# Supplementary material for: Long-term and serious harms of medical cannabis and cannabinoids for chronic pain: a systematic review of non-randomised studies
Source: HighWire-hosted journal article supplement (doi:10.1136/bmjopen-2021-054282), 2022-08-01

# Long-term and serious harms of medical cannabis and cannabinoids for chronic pain: A systematic review and meta-analysis of non-randomized studies

## Appendix

Dr. Jason Busse

[bussejw@mcmaster.ca](mailto:bussejw@mcmaster.ca)

## Contents

|                                                                                                       |    |
|-------------------------------------------------------------------------------------------------------|----|
| Appendix 1: Search strategy .....                                                                     | 3  |
| Appendix 2: Detailed methods for the assessment of risk of bias .....                                 | 18 |
| Appendix 3: List of included studies .....                                                            | 19 |
| Appendix 4: Studies excluded at the full-text screening stage .....                                   | 23 |
| Appendix 5: Risk of bias ratings .....                                                                | 52 |
| Appendix 6: Results for all adverse events (subgroup by design) .....                                 | 53 |
| Appendix 7: Results for all adverse events (subgroup by duration) .....                               | 54 |
| Appendix 8: Results for all adverse events (subgroup by cannabis) .....                               | 55 |
| Appendix 9: Results for all adverse events (subgroup by selection bias) .....                         | 56 |
| Appendix 10: Results for adverse events leading to discontinuation (subgroup by duration) .....       | 57 |
| Appendix 11: Results for adverse events leading to discontinuation (subgroup by cannabis) .....       | 58 |
| Appendix 12: Results for adverse events leading to discontinuation (subgroup by selection bias) ..... | 59 |
| Appendix 13: Results for serious adverse events (subgroup by design) .....                            | 60 |
| Appendix 14: Results for serious adverse events (subgroup by duration) .....                          | 61 |
| Appendix 15: Results for serious adverse events (subgroup by selection bias) .....                    | 62 |
| Appendix 16: Results for psychiatric adverse events .....                                             | 63 |
| Appendix 17: Results for suicide .....                                                                | 64 |
| Appendix 18: Results for suicidal thoughts .....                                                      | 65 |

|                                                       |    |
|-------------------------------------------------------|----|
| Appendix 19: Results for depression .....             | 66 |
| Appendix 20: Results for mania .....                  | 67 |
| Appendix 21: Results for hallucinations.....          | 68 |
| Appendix 22: Results for delusions.....               | 69 |
| Appendix 23: Results for paranoia.....                | 70 |
| Appendix 24: Results for anxiety .....                | 71 |
| Appendix 25: Results for euphoria.....                | 72 |
| Appendix 26: Results for memory impairment.....       | 73 |
| Appendix 27: Results for confusion .....              | 74 |
| Appendix 28: Results for disorientation .....         | 75 |
| Appendix 29: Results for impaired attention.....      | 76 |
| Appendix 30: Results for falls.....                   | 77 |
| Appendix 31: Results for motor vehicle accidents..... | 78 |
| Appendix 32: Results for dependence .....             | 79 |
| Appendix 33: Results for withdrawal symptoms .....    | 80 |
| Appendix 34: Results for withdrawal syndrome.....     | 81 |

## **Appendix 1: Search strategy**

|          |       |
|----------|-------|
| MEDLINE  | 10649 |
| EMBASE   | 6382  |
| Central  | 2426  |
| PsycInfo | 3801  |
| Subtotal | 23260 |
| -dupes   | -6085 |
| Total    | 17175 |

April 1, 2020

Database: OVID Medline Epub Ahead of Print, In-Process & Other Non-Indexed Citations, Ovid MEDLINE(R) Daily and Ovid MEDLINE(R) 1946 to Present

Search Strategy:

-----

- 1 Epidemiologic Studies/ (8256)
- 2 exp Case-Control Studies/ (1067341)
- 3 exp Cohort Studies/ (1974212)
- 4 Case control.tw. (123081)
- 5 (cohort adj (study or studies)).tw. (199133)

- 6 Cohort analy\$.tw. (7799)
  - 7 (Follow up adj (study or studies)).tw. (48708)
  - 8 (observational adj (study or studies)).tw. (103255)
  - 9 Longitudinal.tw. (239715)
  - 10 Retrospective.tw. (515751)
  - 11 Cross sectional.tw. (342224)
  - 12 Cross-sectional studies/ (322752)
  - 13 or/1-12 (2953281)
  - 14 exp animals/ not humans.sh. (4685189)
  - 15 13 not 14 (2889789)
- Annotation: SIGN observational studies filter
- 16 randomized controlled trial.pt. (503041)
  - 17 controlled clinical trial.pt. (93591)
  - 18 randomized.ab. (474985)
  - 19 placebo.ab. (206552)

20 drug therapy.fs. (2191450)

21 randomly.ab. (330409)

22 trial.ab. (500400)

23 groups.ab. (2028909)

24 or/16-23 (4670111)

25 exp animals/ not humans.sh. (4685189)

26 24 not 25 (4048339)

Annotation: Cochrane HSSS RCT filter

27 15 or 26 (6033576)

Annotation: study design filter broad

28 Cannabis/ (8968)

29 exp cannabinoids/ or cannabidiol/ or cannabinol/ or dronabinol/ (13810)

30 Endocannabinoids/ (5630)

31 exp Receptors, Cannabinoid/ (9240)

32 (Cannabis or cannabinol or cannabinoid\* or cannabidiol or bhang or cannador or charas or ganja or ganjah or hashish or hemp or marihuana or marijuana or nabilone or cesamet or cesametic or ajulemic acid or cannabichromene or cannabielsoin or cannabigerol or tetrahydrocannabinol or dronabinol or levonantradol or nabiximols or palmidrol or tetrahydrocannabinolic acid or tetrahydro cannabinol or marinol or tetranabinex or sativex or endocannabinoid\*).mp. (54925)

33 or/28-32 (54925)

Annotation: strategy from 2020 cannabis review

34 27 and 33 (16307)

Annotation: cannabis AND study design filter

35 exp "Drug-Related Side Effects and Adverse Reactions"/ (114376)

36 (ae or to or po or co).fs. (3890270)

37 (safe or safety).ti,ab. (758301)

38 side effect\$.ti,ab. (243706)

39 ((adverse or undesirable or harms\$ or serious or toxic) adj3 (effect\$ or reaction\$ or event\$ or outcome\$)).ti,ab. (501888)

40 exp Product Surveillance, Postmarketing/ (15237)

41 adverse drug reaction reporting systems/ (7463)

42 clinical trials, phase iv/ (295)

- 43 exp Poisoning/ (156177)
- 44 exp Substance-Related Disorders/ (274845)
- 45 Abnormalities, Drug-Induced/ (14514)
- 46 Drug Monitoring/ (20599)
- 47 exp Drug Hypersensitivity/ (45642)
- 48 (toxicity or complication\$ or noxious or tolerability).ti,ab. (1298802)
- 49 or/35-48 (5596308)

Annotation: OVID AE filter

- 50 34 and 49 (10649)

Annotation: Study design filter AND Cannabis AND AE Filter (broad)

Database: Embase <1974 to 2020 March 31>

Search Strategy:

-----

- 1 cannabis/ (33859)

- 2 exp cannabinoid/ (65694)
  - 3 medical cannabis/ (2104)
  - 4 exp cannabinoid receptor/ (14557)
  - 5 exp endocannabinoid/ (8589)
  - 6 (Cannabis or cannabinal or cannabinoid\* or cannabidiol or bhang or cannador or charas or ganja or ganjah or hashish or hemp or marihuana or marijuana or nabilone or cesamet or cesametic or ajulemic acid or cannabichromene or cannabielsoin or cannabigerol or tetrahydrocannabinol or dronabinol or levonantradol or nabiximols or palmidrol or tetrahydrocannabinolic acid or tetrahydro cannabinol or marinol or tetranabinex or sativex or endocannabinoid\*).mp. [mp=title, abstract, heading word, drug trade name, original title, device manufacturer, drug manufacturer, device trade name, keyword, floating subheading word, candidate term word] (86550)
  - 7 or/1-6 (87843)
- Annotation: cannabis
- 8 clinical study/ (154879)
  - 9 case control study/ (153658)
  - 10 family study/ (26012)
  - 11 longitudinal study/ (137463)
  - 12 retrospective study/ (897628)
  - 13 prospective study/ (590879)



- 14 randomized controlled trials/ (176633)
- 15 13 not 14 (584662)
- 16 cohort analysis/ (564001)
- 17 (Cohort adj (study or studies)).mp. [mp=title, abstract, heading word, drug trade name, original title, device manufacturer, drug manufacturer, device trade name, keyword, floating subheading word, candidate term word] (296961)
- 18 (Case control adj (study or studies)).mp. [mp=title, abstract, heading word, drug trade name, original title, device manufacturer, drug manufacturer, device trade name, keyword, floating subheading word, candidate term word] (211490)
- 19 (follow up adj (study or studies)).mp. [mp=title, abstract, heading word, drug trade name, original title, device manufacturer, drug manufacturer, device trade name, keyword, floating subheading word, candidate term word] (65948)
- 20 (observational adj (study or studies)).mp. [mp=title, abstract, heading word, drug trade name, original title, device manufacturer, drug manufacturer, device trade name, keyword, floating subheading word, candidate term word] (242526)
- 21 (epidemiologic\$ adj (study or studies)).mp. [mp=title, abstract, heading word, drug trade name, original title, device manufacturer, drug manufacturer, device trade name, keyword, floating subheading word, candidate term word] (109669)
- 22 (cross sectional adj (study or studies)).mp. [mp=title, abstract, heading word, drug trade name, original title, device manufacturer, drug manufacturer, device trade name, keyword, floating subheading word, candidate term word] (385983)
- 23 or/8-12,15-22 (2808984)

Annotation: SIGN observational studies filter

24 7 and 23 (9720)

Annotation: cannabis AND observational studies

25 randomized controlled trial/ (597702)

26 Controlled clinical study/ (463832)

27 random\$.ti,ab. (1518977)

28 randomization/ (86491)

29 intermethod comparison/ (258334)

30 placebo.ti,ab. (303428)

31 (compare or compared or comparison).ti. (504683)

32 ((evaluated or evaluate or evaluating or assessed or assess) and (compare or compared or comparing or comparison)).ab. (2082229)

33 (open adj label).ti,ab. (78190)

34 ((double or single or doubly or singly) adj (blind or blinded or blindly)).ti,ab. (229917)

35 double blind procedure/ (171048)

36 parallel group\$1.ti,ab. (25201)

37 (crossover or cross over).ti,ab. (104010)

38 ((assign\$ or match or matched or allocation) adj5 (alternate or group\$1 or intervention\$1 or patient\$1 or subject\$1 or participant\$1)).ti,ab. (325625)

39 (assigned or allocated).ti,ab. (383429)

40 (controlled adj7 (study or design or trial)).ti,ab. (343515)

41 (volunteer or volunteers).ti,ab. (244577)

42 human experiment/ (490389)

43 trial.ti. (295850)

44 or/25-43 (4952112)

Annotation: Cochrane RCT filter

45 7 and 44 (14036)

Annotation: cannabis AND RCTs

46 24 or 45 (21357)

Annotation: cannabis AND (Obs studies OR RCTs)

47 7 and (23 or 44) (21357)

Annotation: logic check

48 (ae or si or to or co).fs. (3204803)

49 (safe or safety).ti,ab. (1154971)

50 side effect\$.ti,ab. (358075)

51 ((adverse or undesirable or harm\$ or serious or toxic) adj3 (effect\$ or reaction\$ or event\$ or outcome\$)).ti,ab. (787739)

52 exp adverse drug reaction/ (522775)

53 exp drug toxicity/ (125051)

54 exp intoxication/ (366563)

55 exp drug safety/ (393912)

56 exp drug monitoring/ (53058)

57 exp drug hypersensitivity/ (56248)

58 exp postmarketing surveillance/ (35831)

59 exp drug surveillance program/ (26017)

60 exp phase iv clinical trial/ (3822)

61 (toxicity or complication\$ or noxious or tolerability).ti,ab. (1868476)

62 or/48-61 (6002309)

Annotation: OVID AE filter 1-14

63 47 and 62 (6382)

Cannabis AEs

Search Name: cannabis AEs

Date Run: 01/04/2020 18:42:40

Comment:

ID Search Hits

#1 MeSH descriptor: [Cannabis] explode all trees 298

#2 MeSH descriptor: [Cannabinoids] explode all trees 790

#3 MeSH descriptor: [Endocannabinoids] explode all trees 48

- #4 MeSH descriptor: [Endocannabinoids] explode all trees 48
- #5 (Cannabis or cannabinol or cannabinoid\* or cannabidiol or bhang or cannador or charas or ganja or ganjah or hashish or hemp or marihuana or marijuana or nabilone or cesamet or cesametic or ajulemic acid or cannabichromene or cannabielsoin or cannabigerol or tetrahydrocannabinol or dronabinol or levonantradol or nabiximols or palmidrol or tetrahydrocannabinolic acid or tetrahydrocannabinol or marinol or tetranabinex or sativex or endocannabinoid\*):ti,ab,kw (Word variations have been searched) 4370
- #6 #1 or #2 or #3 or #4 or #5 4370
- #7 MeSH descriptor: [Drug-Related Side Effects and Adverse Reactions] explode all trees 3463
- #8 MeSH descriptor: [] explode all trees and with qualifier(s): [adverse effects - AE, toxicity - TO, poisoning - PO, complications - CO] 169278
- #9 (safe or safety):ti,ab,kw (Word variations have been searched) 258304
- #10 (side effect\*):ti,ab,kw (Word variations have been searched) 149400
- #11 ((adverse or undesirable or harms\* or serious or toxic) near/3 (effect\* or reaction\* or event\* or outcome\*)):ti,ab,kw (Word variations have been searched) 279577
- #12 MeSH descriptor: [Product Surveillance, Postmarketing] explode all trees 191
- #13 MeSH descriptor: [Adverse Drug Reaction Reporting Systems] explode all trees 82
- #14 MeSH descriptor: [Clinical Trial, Phase IV] explode all trees 0
- #15 MeSH descriptor: [Poisoning] explode all trees 2101

- #16 MeSH descriptor: [Substance-Related Disorders] explode all trees 14586
- #17 MeSH descriptor: [Abnormalities, Drug-Induced] explode all trees 47
- #18 MeSH descriptor: [Drug Monitoring] explode all trees 1725
- #19 MeSH descriptor: [Drug Hypersensitivity] explode all trees 965
- #20 (toxicity or complication\* or noxious or tolerability):ti,ab,kw (Word variations have been searched) 332240
- #21 #7 or #8 or #9 or #10 or #11 or #12 or #13 or #14 or #15 or #16 or #17 or #18 or #19 or #20 626064
- #22 #6 and #21 in Trials 2426

#### PsycInfo

Database: APA PsycInfo <1806 to March Week 4 2020>

#### Search Strategy:

-----

- 1 exp cannabis/ or exp cannabinoids/ or tetrahydrocannabinol/ (12819)
- 2 (Cannabis or cannabinoil or cannabinoid\* or cannabidiol or bhang or cannador or charas or ganja or ganjah or hashish or hemp or marihuana or marijuana or nabilone or cesamet or cesametic or ajulemic acid or cannabichromene or cannabielsoin or cannabigerol or tetrahydrocannabinol or dronabinol or levonantradol or nabiximols or palmidrol or tetrahydrocannabinolic acid or tetrahydro cannabinoil or

marinol or tetranabinex or sativex or endocannabinoid\*).mp. [mp=title, abstract, heading word, table of contents, key concepts, original title, tests & measures, mesh] (26466)

3 1 or 2 (26466)

4 exp "side effects (drug)"/ (57604)

5 (safe or safety).ti,ab. (84148)

6 side effect\$.ti,ab. (31950)

7 ((adverse or undesirable or harms\$ or serious or toxic) adj3 (effect\$ or reaction\$ or event\$ or outcome\$)).ti,ab. (44183)

8 toxic disorders/ (1433)

9 exp "substance use disorder"/ (127742)

10 (toxicity or complication\$ or noxious or tolerability).ti,ab. (42844)

11 or/4-10 (310848)

12 3 and 11 (10984)

13 epidemiology/ (49562)

14 ((case\* adj5 control\*) or (case adj3 comparison\*) or case-comparison or control group\*).ti,ab,id. not "Literature Review".md. (95810)



- 15 ((cohort or longitudinal or prospective or retrospective).ti,ab,id. or longitudinal study.md. or prospective study.md. or retrospective study.md.) not "Literature Review".md. (286455)
- 16 (cross section\* or "prevalence study").ti,ab,id. (80384)
- 17 clinical trials/ or "treatment outcome clinical trial".md. or ((randomi?ed adj7 trial\*) or ((single or doubl\* or tripl\* or treb\*) and (blind\* or mask\*)) or (controlled adj3 trial\*) or (clinical adj2 trial\*)).ti,ab,id. (101001)
- 18 Case control.mp. (10736)
- 19 (cohort adj (study or studies)).mp. [mp=title, abstract, heading word, table of contents, key concepts, original title, tests & measures, mesh] (21026)
- 20 Cohort analy\$.mp. (2099)
- 21 (Follow up adj (study or studies)).mp. [mp=title, abstract, heading word, table of contents, key concepts, original title, tests & measures, mesh] (12876)
- 22 (Longitudinal or Retrospective or Cross sectional).mp. [mp=title, abstract, heading word, table of contents, key concepts, original title, tests & measures, mesh] (218589)
- 23 or/13-22 (561443)
- 24 12 and 23 (3801)

## **Appendix 2: Detailed methods for the assessment of risk of bias**

We rated studies at serious risk of confounding bias when they when they did not adjust for important predictors of adverse events and cannabis use, including, at minimum, pain intensity, concomitant pain medication, disability status, alcohol use, past cannabis use and at critical risk if they did not include a control group. We rated studies at serious risk of selection bias when studies included prevalent medical cannabis users (i.e., patients who experience serious or debilitating adverse events are more likely to discontinue cannabis and hence less likely to be included in studies of prevalent users). We rated studies at serious risk of misclassification of the intervention if there was evidence that medical cannabis users were not appropriately classified. We rated studies at serious risk of bias due to departure from the intended intervention if the intervention was not delivered as intended or more than 20% of patients discontinued the intervention for reasons unrelated to adverse effects (e.g., costs). We rated studies at serious risk of missing data when 20% or more of the original patients did not have adverse event data. Finally, we rated studies at moderate risk of selective reporting when the study did not differentiate between minor and serious adverse events or when there were indications that adverse events were selectively, and not comprehensively, reported.

### **Appendix 3: List of included studies**

1. Anderson SP, Zylla DM, McGriff DM, Arneson TJ. Impact of medical cannabis on patient-reported symptoms for patients with cancer enrolled in Minnesota's medical cannabis program. *Journal of Oncology Practice*. 2019;15(6):E338-E45.
2. Bellnier T, Brown GW, Ortega TR. Preliminary evaluation of the efficacy, safety, and costs associated with the treatment of chronic pain with medical cannabis. *The Mental Health Clinician*. 2018;8(3):110-5.
3. Bestard JA, Toth CC. An open-label comparison of nabilone and gabapentin as adjuvant therapy or monotherapy in the management of neuropathic pain in patients with peripheral neuropathy. *Pain Practice*. 2011;11(4):353-68.
4. Bonar EE, Cranford JA, Arterberry BJ, Walton MA, Bohnert KM, Ilgen MA. Driving under the influence of cannabis among medical cannabis patients with chronic pain. *Drug & Alcohol Dependence*. 2019;195:193-7.
5. Cervigni M, Nasta L, Schievano C, Lampropoulou N, Ostardo E. Micronized Palmitoylethanolamide-Polydatin Reduces the Painful Symptomatology in Patients with Interstitial Cystitis/Bladder Pain Syndrome. *BioMed Research International*. 2019;2019 (no pagination)(9828397).
6. Chirchiglia D, Chirchiglia P, Signorelli F. Nonsurgical lumbar radiculopathies treated with ultramicrozoned palmitoylethanolamide (umPEA): A series of 100 cases. *Neurologia i Neurochirurgia Polska*. 2018;52(1):44-7.
7. Cranford JA, Arnedt JT, Conroy DA, Bohnert KM, Bourque C, Blow FC, et al. Prevalence and correlates of sleep-related problems in adults receiving medical cannabis for chronic pain. *Drug & Alcohol Dependence*. 2017;180:227-33.
8. Cremer-Schaeffer P, Schmidt-Wolf G, Broich K. [Cannabis medicines in pain management : Interim analysis of the survey accompanying the prescription of cannabis-based medicines in Germany with regard to pain as primarily treated symptom]. *Der Schmerz*. 2019;33(5):415-23.
9. Crowley K, de Vries ST, Moreno-Sanz G. Self-Reported Effectiveness and Safety of Trokie R Lozenges: A Standardized Formulation for the Buccal Delivery of Cannabis Extracts. *Frontiers in Neuroscience*. 2018;12:564.
10. Del Giorno R, Skaper S, Paladini A, Varrassi G, Coaccioli S. Palmitoylethanolamide in Fibromyalgia: Results from Prospective and Retrospective Observational Studies. *Pain and Therapy*. 2015;4(2):169-78.
11. Domínguez CM, Martín AD, Ferrer FG, Puertas MI, Muro AL, González JM, et al. N-palmitoylethanolamide in the treatment of neuropathic pain associated with lumbosciatica. *Pain Manag*. 2012;2(2):119-24.
12. Fanelli G, De Carolis G, Leonardi C, Longobardi A, Sarli E, Allegri M, et al. Cannabis and intractable chronic pain: an explorative retrospective analysis of Italian cohort of 614 patients. *Journal of pain research*. 2017;10:1217-24.

13. Feingold D, Goor-Aryeh I, Bril S, Delayahu Y, Lev-Ran S. Problematic Use of Prescription Opioids and Medicinal Cannabis Among Patients Suffering from Chronic Pain. *Pain Medicine*. 2017;18(2):294-306.
14. Fiz J, Duran M, Capella D, Carbonell J, Farre M. Cannabis use in patients with Fibromyalgia: Effect on symptoms relief and health-related quality of life. *PLoS ONE*. 2011;6 (4) (no pagination)(e18440).
15. Gatti A, Lazzari M, Gianfelice V, Di Paolo A, Sabato E, Sabato AF. Palmitoylethanolamide in the treatment of chronic pain caused by different etiopathogenesis. *Pain Medicine*. 2012;13(9):1121-30.
16. Giorgi V, Bongiovanni S, Atzeni F, Marotto D, Salaffi F, Sarzi-Puttini P. Adding medical cannabis to standard analgesic treatment for fibromyalgia: a prospective observational study. *Clinical & Experimental Rheumatology*. 2020;38 Suppl 123(1):53-9.
17. Habib G, Artul S. Medical Cannabis for the Treatment of Fibromyalgia. *JCR: Journal of Clinical Rheumatology*. 2018;24(5):255-8.
18. Haroutounian S, Ratz Y, Ginosar Y, Furmanov K, Saifi F, Meidan R, et al. The Effect of Medicinal Cannabis on Pain and Quality-of-Life Outcomes in Chronic Pain: A Prospective Open-label Study. *Clinical Journal of Pain*. 2016;32(12):1036-43.
19. Hoggart B, Ratcliffe S, Ehler E, Simpson KH, Hovorka J, Lejcko J, et al. A multicentre, open-label, follow-on study to assess the long-term maintenance of effect, tolerance and safety of THC/CBD oromucosal spray in the management of neuropathic pain. *Journal of Neurology*. 2015;262(1):27-40.
20. Lejczak S, Rousselot H, Di Patrizio P, Debouverie M. Dronabinol use in France between 2004 and 2017. *Revue Neurologique*. 2019;175(5):298-304.
21. Loi ES, Pontis A, Cofelice V, Pirarba S, Fais MF, Daniilidis A, et al. Effect of ultramicro-nized-palmitoylethanolamide and co-micronized-palmitoylethanolamide/polydatin on chronic pelvic pain and quality of life in endometriosis patients: An open-label pilot study. *International Journal of Women's Health*. 2019;11:443-9.
22. Lynch ME, Young J, Clark AJ. A case series of patients using medicinal marijuana for management of chronic pain under the Canadian Marijuana Medical Access Regulations. *Journal of Pain & Symptom Management*. 2006;32(5):497-501.
23. Naftali T, Bar-Lev Schleider L, Sklerovsky Benjaminov F, Lish I, Konikoff FM, Ringel Y. Medical cannabis for inflammatory bowel disease: real-life experience of mode of consumption and assessment of side-effects. *European Journal of Gastroenterology & Hepatology*. 2019;31(11):1376-81.
24. Paladini A, Varrassi G, Bentivegna G, Carletti S, Piroli A, Coaccioli S. Palmitoylethanolamide in the Treatment of Failed Back Surgery Syndrome. *Pain Res Treat*. 2017;2017:1486010.
25. Passavanti MB, Fiore M, Sansone P, Aurilio C, Pota V, Barbarisi M, et al. The beneficial use of ultramicro-nized palmitoylethanolamide as add-on therapy to Tapentadol in the treatment of low back pain: a pilot study comparing prospective and retrospective observational arms. *BMC Anesthesiology*. 2017;17(1):171.

26. Perron BE, Holt KR, Yeagley E, Ilgen M. Mental health functioning and severity of cannabis withdrawal among medical cannabis users with chronic pain. *Drug & Alcohol Dependence*. 2019;194:401-9.
27. Rog DJ, Nurmikko TJ, Young CA. Oromucosal delta9-tetrahydrocannabinol/cannabidiol for neuropathic pain associated with multiple sclerosis: an uncontrolled, open-label, 2-year extension trial. *Clinical Therapeutics*. 2007;29(9):2068-79.
28. Sagy I, Bar-Lev Schleider L, Abu-Shakra M, Novack V. Safety and Efficacy of Medical Cannabis in Fibromyalgia. *Journal of Clinical Medicine*. 2019;8(6):05.
29. Schifilliti C, Cucinotta L, Fedele V, Ingegnesi C, Luca S, Leotta C. Micronized palmitoylethanolamide reduces the symptoms of neuropathic pain in diabetic patients. *Pain Res Treat*. 2014;2014:849623.
30. Schimrigk S, Marziniak M, Neubauer C, Kugler EM, Werner G, Abramov-Sommariva D. Dronabinol Is a Safe Long-Term Treatment Option for Neuropathic Pain Patients. *European Neurology*. 2017;78(5-6):320-9.
31. Sinclair J, Smith CA, Abbott J, Chalmers KJ, Pate DW, Armour M. Cannabis Use, a Self-Management Strategy Among Australian Women With Endometriosis: Results From a National Online Survey. *Journal of Obstetrics & Gynaecology Canada: JOGC*. 2020;42(3):256-61.
32. Storr M, Devlin S, Kaplan GG, Panaccione R, Andrews CN. Cannabis use provides symptom relief in patients with inflammatory bowel disease but is associated with worse disease prognosis in patients with Crohn's disease. *Inflammatory Bowel Diseases*. 2014;20(3):472-80.
33. Toth C, Mawani S, Brady S, Chan C, Liu C, Mehina E, et al. An enriched-enrolment, randomized withdrawal, flexible-dose, double-blind, placebo-controlled, parallel assignment efficacy study of nabilone as adjuvant in the treatment of diabetic peripheral neuropathic pain. *Pain*. 2012;153(10):2073-82.
34. Ueberall MA, Essner U, Mueller-Schwefe GHH. Effectiveness and tolerability of THC:CBD oromucosal spray as add-on measure in patients with severe chronic pain: Analysis of 12-week open-label real-world data provided by the German pain e-registry. *Journal of Pain Research*. 2019;12:1577-604.
35. Vigil JM, Stith SS, Adams IM, Reeve AP. Associations between medical cannabis and prescription opioid use in chronic pain patients: A preliminary cohort study. *PLoS ONE [Electronic Resource]*. 2017;12(11):e0187795.
36. Ware MA, Doyle CR, Woods R, Lynch ME, Clark AJ. Cannabis use for chronic non-cancer pain: results of a prospective survey. *Pain*. 2003;102(1-2):211-6.
37. Ware MA, Wang T, Shapiro S, Collet JP, team Cs. Cannabis for the Management of Pain: Assessment of Safety Study (COMPASS). *Journal of Pain*. 2015;16(12):1233-42.
38. Weber J, Schley M, Casutt M, Gerber H, Schuepfer G, Rukwied R, et al. Tetrahydrocannabinol (Delta 9-THC) treatment in chronic central neuropathic pain and fibromyalgia patients: Results of a multicenter survey. *Anesthesiology Research and Practice*. 2009;2009 (no pagination)(827290).

39. Yassin M, Oron A, Robinson D. Effect of adding medical cannabis to analgesic treatment in patients with low back pain related to fibromyalgia: an observational cross-over single centre study. *Clinical & Experimental Rheumatology*. 2019;37 Suppl 116(1):13-20.

## **Appendix 4: Studies excluded at the full-text screening stage**

### **Not a full-text report of a non-randomized study**

1. Apro MS. Prevention of chemotherapy-induced nausea and vomiting in patients with cancer. *Arizona Medicine*. 1981;38(11):843-5.
2. Abrams DI, Guzman M. Cannabis in cancer care. *Clinical Pharmacology & Therapeutics*. 2015;97(6):575-86.
3. Actrn. Cannabis-Based Medicine (Sativex) in the Treatment of Pain in Kidney Failure. <http://www.who.int/trialssearch/Trial2.aspx?TrialID=ACTRN12610000783022>. 2010.
4. Actrn. The CANBACK trial, to determine the efficacy of oral cannabidiol, when compared to placebo, as an adjunct for the treatment of acute non-traumatic low back pain. <http://www.who.int/trialssearch/Trial2.aspx?TrialID=ACTRN12618000487213>. 2018.
5. Adhiyaman V, Arshad S. Cannabis for intractable nausea after bilateral cerebellar stroke. *Journal of the American Geriatrics Society*. 2014;62(6):1199.
6. Ahmed A, van der Marck MA, van den Elsen G, Olde Rikkert M. Cannabinoids in late-onset Alzheimer's disease. *Clinical Pharmacology & Therapeutics*. 2015;97(6):597-606.
7. Ahmed AI, van den Elsen GA, van der Marck MA, Olde Rikkert MG. Cannabinoids for pain in dementia: the good, the bad, and the ugly. *Journal of the American Geriatrics Society*. 2014;62(5):1001-2.
8. Anonymous. Latest trial suggests cannabis does not relieve spasticity of multiple sclerosis. *Pharmaceutical Journal*. 2002;268(7198):675.
9. Anonymous. Cannabis derivatives and pain. A small role for delta9-tetrahydrocannabinol (THC) in some forms of multiple sclerosis. *Prescrire International*. 2009;18(103):226.
10. Anonymous. Association between cannabis use and complications related to ulcerative colitis in hospitalized patients: A propensity matched retrospective cohort study: Erratum. *Medicine*. 2019;98(35):e17046.
11. Arboleda MF, Dam V, Prosk E, Dworkind M, Vigano A. Cannabis-Based Medications: The Future Co-analgesics of Choice for Cancer Patients? *Journal of Pain and Symptom Management*. 2018;56(6):e68.
12. Arboleda MF, Dam V, Prosk E, Dworkind M, Vigano A. Transforming symptom management in cancer patients: Is medical cannabis a new paradigm? *Supportive Care in Cancer*. 2018;26 (2 Supplement 1):S53.
13. Ashton CH. Adverse effects of cannabis and cannabinoids. *British Journal of Anaesthesia*. 1999;83(4):637-49.

14. Ballas SK. Use of marijuana in patients with sickle cell disease increased the frequency of hospitalization for acute painful vaso-occlusive crises. *Blood Conference: 58th Annual Meeting of the American Society of Hematology, ASH*. 2016;128(22).
15. Bergamaschi V, Konrad G, Battaglia MA, Brichetto G. Efficacy and discontinuation of nabiximols in patients with multiple sclerosis: A real-life study. *Multiple Sclerosis Journal*. 2018;24 (2 Supplement):959.
16. Bertsche T, Schulz M. Cannabis can relieve spasticity associated with multiple sclerosis. [German]. *Pharmazeutische Zeitung*. 2003;148(8):32-3.
17. Bialas P, Drescher B, Gottschling S, Juckenhofel S, Konietzke D, Kuntz W, et al. [Cannabis-based medicines for chronic pain: indications, selection of drugs, effectiveness and safety : Experiences of pain physicians in Saarland]. *Der Schmerz*. 2019;33(5):399-406.
18. Blondin N. The evolving role of complementary cannabis therapy in glioblastoma treatment. *Neuro-Oncology*. 2018;20 (Supplement 6):vi214-vi5.
19. Bronstein K, Dhaliwal J, Leider H. Rates of inappropriate drug use in the chronic pain population: An update. *Journal of Pain*. 2011;1):P5.
20. Brusberg M, Kang D, Larsson H, Lindstrom E, Martinez V. Inhibition of fatty acid amide hydrolase (FAAH) activity enhances the analgesic action of the endocannabinoid anandamide on visceral pain. *Gastroenterology*. 2009;1):A141.
21. Bulbul A, Mino EA, Khorsand-Sahbaie M, Lentkowski L. Opioid dose reduction and pain control with medical cannabis. *Journal of Clinical Oncology Conference*. 2018;36(34 Supplement).
22. Caulley L, Caplan B, Ross E. Medical Marijuana for Chronic Pain. *New England Journal of Medicine*. 2018;379(16):1575-7.
23. Clements-Nolle K, Lensch T, Larson S, Yang W. Prevalence and correlates of any and frequent synthetic cannabinoid use in a representative sample of high school students. *Substance Use & Misuse*. 2016;51(9):1139-46.
24. Costales B, Van Boemmel-Wegmann S, Segal R. A descriptive analysis of Florida medical marijuana registry patients from 2016-2017. *Pharmacoepidemiology and Drug Safety*. 2019;28 (Supplement 2):268.
25. Cuestas E. [Cannabis for chronic neuropathic pain.]. *Revista de la Facultad de Ciencias Medicas de Cordoba*. 2019;76(1):1-2.
26. De Trane S, Buchanan K, Keenan L, Valentine C, Liddicut M, Stevenson V, et al. Nabiximols has a beneficial effect on self report of MS related spasticity. *Multiple Sclerosis*. 2016;22 (Supplement 3):684.
27. De Trane S, Buchanan K, Keenan L, Valentine C, Liddicut M, Stevenson V, et al. Thc:cbd (nabiximols) has a beneficial effect on multiple sclerosis (MS) related spasticity and delays or negates the need for intrathecal baclofen pump implantation. *Neurology Conference: 69th American Academy of Neurology Annual Meeting, AAN*. 2017;88(16 Supplement 1).



28. Degenhardt L, Hall WD. The adverse effects of cannabinoids: implications for use of medical marijuana. *CMAJ Canadian Medical Association Journal*. 2008;178(13):1685-6.
29. Di Francesco A, Pizzigallo D. Use of micronized palmitoylethanolamide and trans-polydatin in chronic pelvic pain associated with endometriosis. An open-label study. *Giornale Italiano di Ostetricia e Ginecologia*. 2014;36(2):353-8.
30. Dimou T, Spanomanoli A, Michelis S. The use of palmitoylethanolamide (PEA) in FBSS for chronic pain management. *Regional Anesthesia and Pain Medicine*. 2019;44 (10 Supplement 1):A168.
31. Donato F, Turri M, Zanette G, Tugnoli V, Deotto L, Teatini F, et al. A study of cortical and spinal excitability in patients affected by multiple sclerosis and spasticity after oromucosal cannabinoid spray (THC/CBD). *Clinical Neurophysiology*. 2016;127 (4):e147.
32. Donovan KA. Age-related differences in cannabis use by cancer patients referred for supportive care. Diane Portman. *Journal of Clinical Oncology Conference*. 2019;37(31 Supplement 1).
33. Dow GJ, Meyers FH, Stanton W, Devine ML. Serious reactions to oral delta-9-tetrahydrocannabinol in cancer chemotherapy patients. *Clinical Pharmacy*. 1984;3(1):14.
34. Dusi V, Attili SVS, Singaraju M. Observational study on role of crude cannabis in pain control and quality of life in terminally ill cancer patients: An Indian perspective. *Annals of Oncology*. 2019;30 (Supplement 9):ix119.
35. Eltayb A, Etges T, Wright S. An observational post-approval registry study of patients prescribed Sativex. Results from clinical practice. *Multiple Sclerosis*. 2013;1):480.
36. Erbe B. [Cannabis - medicinal use]. *Deutsche Medizinische Wochenschrift*. 2014;139(3):74-5.
37. Eucr AT. SATIVEX® AS ADD-ON THERAPY VS. FURTHER OPTIMIZED FIRST-LINE ANTISPASTICS. <http://www.who.int/trialssearch/Trial2.aspx?TrialID=EUCTR2015-004451-40-AT>. 2016.
38. Eucr BE. An investigational study to assess the effect of GS-5745 on adult patients with Cystic Fibrosis. <http://www.who.int/trialssearch/Trial2.aspx?TrialID=EUCTR2015-002192-23-BE>. 2016.
39. Eucr DE. A cannabis preparation for neuropathic pain. <http://www.who.int/trialssearch/Trial2.aspx?TrialID=EUCTR2014-005344-17-DE>. 2015.
40. Eucr DK. Effect of Sativex on pain and spasticity following spinal cord injury. <http://www.who.int/trialssearch/Trial2.aspx?TrialID=EUCTR2012-005328-14-DK>. 2013.
41. Eucr DK. The effect of cannabis products on nerve pain and muscle stiffness in patients with multiple sclerosis and in patients with spinal cord injury. <http://www.who.int/trialssearch/Trial2.aspx?TrialID=EUCTR2018-002315-98-DK>. 2018.
42. Eucr GB. Study of Sativex for the Treatment of Cancer Related Pain. <http://www.who.int/trialssearch/Trial2.aspx?TrialID=EUCTR2009-016065-29-GB>. 2010.
43. Eucr IT. CLINICAL STUDY TO EVALUATE THE EFFECTIVENESS OF Sativex in relieving pain PEOPLE AFFECTED BY MULTIPLE SCLEROSIS. <http://www.who.int/trialssearch/Trial2.aspx?TrialID=EUCTR2011-002258-30-IT>. 2012.

44. Euctr NL.  $\Delta$ 9-THC (Nabilol<sup>®</sup>) in persistent postsurgical pain. <http://www.who.int/trialssearch/Trial2.aspx?TrialID=EUCTR2012-000812-27-NL>. 2012.
45. Euctr NL. Perioperative  $\Delta$ 9-THC for postsurgical pain. <http://www.who.int/trialssearch/Trial2.aspx?TrialID=EUCTR2012-005808-17-NL>. 2013.
46. Euctr NL. Interaction between opioids and cannabinoids in the treatment of fibromyalgia pain. <http://www.who.int/trialssearch/Trial2.aspx?TrialID=EUCTR2019-001861-33-NL>. 2019.
47. Fernandez O. Advances in the management of multiple sclerosis spasticity: Recent clinical trials. *European Neurology*. 2014;72:9-11.
48. Ferrante F, Polito G, Ferraro M. DELTA-9-tetrahydrocannabinol (Sativex) for the treatment of multiple sclerosis spasticity: Evaluation of effectiveness and safety. *European Journal of Hospital Pharmacy*. 2019;26 (Supplement 1):A239.
49. Ferre L, Nuara A, Pavan G, Radaelli M, Moiola L, Rodegher M, et al. Medium and long term efficacy of nabiximols for the treatment of multiple sclerosis related spasticity: An Italian monocentric study. *Multiple Sclerosis*. 2015;1):728-9.
50. Ferre L, Pavan G, Nuara A, Radaelli M, Liberatore G, Guaschino C, et al. Efficacy, safety and response rate to Nabiximol for the treatment of MS-related spasticity in an Italian monocentric cohort. *Multiple Sclerosis*. 2015;21 (4):501-2.
51. Ferre L, Sorosina M, Santoro S, Moiola L, Rodegher M, Colombo B, et al. Efficacy, safety and response rate of nabiximols assessed in an Italian monocentric cohort. *Multiple Sclerosis*. 2014;1):469-70.
52. Fitzcharles MA, McDougall J, Ste-Marie PA, Padjen I. Clinical implications for cannabinoid use in the rheumatic diseases: potential for help or harm? *Arthritis & Rheumatism*. 2012;64(8):2417-25.
53. Flachenecker P, Zettl U, Henze T. THC:CBD oromucosal spray (nabiximols) in the long term treatment of multiple sclerosis spasticity. The MOVE 2 long-term study. *Multiple Sclerosis*. 2013;1):527.
54. Flank J, Lavoratore S, Vol H, Taylor T, Zelunka E, Nathan P, et al. Chemotherapy-induced nausea and vomiting in children receiving high dose methotrexate with or without vincristine: Preliminary results. *Canadian Journal of Hospital Pharmacy*. 2014;67 (1):61.
55. Freidel M, Tiel-Wilck K, Schreiber H, Lang M. Resistant multiple sclerosis spasticity (MSS) treatment with THC:CBD spray and effects on driving ability. *Multiple Sclerosis*. 2013;1):522-3.
56. Friedman D, Devinsky O. Cannabinoids in the Treatment of Epilepsy. *New England Journal of Medicine*. 2015;373(11):1048-58.
57. Funke A, Spittel S, Kettemann D, Maier A, Munch C, Meyer T. Delta-9-Tetrahydrocannabinol-cannabidiol (THC/CBD) oromucosal spray for the treatment of spasticity in ALS - Assessment of patient reported outcomes. *Clinical Neurophysiology*. 2018;129 (8):e83.
58. Gallo E, Maggini V, Comite M, Sofi F, Baccetti S, Vannacci A, et al. SENeCA Study: Observational study on the effect of medicinal cannabis on quality of life and nutritional outcomes. *BMC*

Complementary and Alternative Medicine Conference: World Congress Integrative Medicine and Health. 2017;17(Supplement 1).

59. Galvin D, Mulkerrin O. Cannabis-based medications: A comparison of patients' knowledge and awareness in pain, neurology and prescription out-patient settings. *Pain Practice*. 2018;18 (Supplement 1):60.

60. Gamaoun R, Kasvis P, Patronidis F, Arboleda MF, Vigano A. Potential impact of medical cannabis treatment on pain control among cancer patients in Quebec-Canada: A pilot study. *Supportive Care in Cancer*. 2019;27 (1 Supplement):S54-S5.

61. Gaston T, Szaflarski M, Hansen B, Grayson L, Bebin EM, Szaflarski J. Improvement in quality of life ratings after one year of treatment with pharmaceutical formulation of cannabidiol (CBD). *Epilepsia*. 2017;58 (Supplement 5):S159.

62. Gauter B, Rukwied R, Konrad C. [Use and effectiveness of dronabinol (delta-9-tetrahydrocannabinol) in chronic pain]. *Der Schmerz*. 2004;18 Suppl 2:S11-4.

63. Gerardi MC, Batticciotto A, Talotta R, Ditto MC, Atzeni F, Sarzi-Puttini P. Efficacy of cannabis flos in patients with fibromyalgia: A monocentric observational study. *Arthritis and Rheumatology*. 2016;68 (Supplement 10):72-4.

64. Gilmore D, Hooper C, Nemastil CJ, Dell ML, McCoy K, Kirkby SE. Effects of self-reported marijuana use on adherence and mental health disease in cystic fibrosis. *Pediatric Pulmonology*. 2018;53 (Supplement 2):424.

65. Gubbiotti M, Illiano E, Costantini E, Giannantoni A. Palmitoylethanolamide/polydatin as add-on therapy in pain resistant patients with interstitial cystitis/bladder painful syndrome. *European Urology, Supplements*. 2019;18 (1):e1970.

66. Guerrero LJ, Maclas IC, Del Castillo SSF, Izquierdo MM, Rengifo CD, Nunez MN. Effectiveness and safety of d-9-tetrahydrocannabinol (sativex) in patients with multiple sclerosis spasticity. *European Journal of Hospital Pharmacy*. 2017;24 (Supplement 1):A113.

67. Guindon J. Nabilone in inflammatory pain: to be or not to be. *Clinical & Experimental Pharmacology & Physiology*. 2012;39(4):327-8.

68. Gurevich T, Bar Lev Chleider L, Rosenberg A, Knaani J, Baruch Y, Djaldetti R. Effect of medical cannabis in Parkinson's disease: Survey of patient experiences. *Movement Disorders*. 2015;1):S88-S9.

69. Gutierrez T, Hohmann AG. Cannabinoids for the treatment of neuropathic pain: Are they safe and effective? *Future Neurology*. 2011;6(2):129-33.

70. Guttenthaler V, Wittmann M. Replacement of benzodiazepines by cannabinoids for the preoperative medication-a feasibility trial (Beach-Trial). *Medical Cannabis and Cannabinoids*. 2019;2 (2):78.

71. Gyang T, Hyland M, Samkoff L, Goodman A. "Real world" experience of medical marijuana in symptomatic management of multiple sclerosis and transverse myelitis. *Neurology Conference: 70th Annual Meeting of the American Academy of Neurology, AAN*. 2018;90(15 Supplement 1).

72. Hansra D, Granada H. Evaluation of safety, efficacy, and clinical endpoints of delta-9-tetrahydrocannabinol in patients age 60 or older with hematologic and oncologic malignancies. *Blood Conference: 59th Annual Meeting of the American Society of Hematology, ASH*. 2017;130(Supplement 1).
73. Hansra DM. Evaluation of safety, efficacy, and other clinical endpoints of delta-9-tetrahydrocannabinol in older patients with hem/onc malignancies. *Journal of Clinical Oncology Conference*. 2017;35(15 Supplement 1).
74. Haupts M, Jonas A, Witte K, Alvarez-Ossorio L. Influence of optimized anti-spastic pre-treatment on the efficacy and tolerability of THC: CBD oromucosal spray in multiple sclerosis spasticity patients. A post-hoc RCT data analyses. *Multiple Sclerosis*. 2015;1):708-9.
75. Hicks K, Snyder C. Impact of high-dose cannabis use in patients with advanced pancreatic cancer undergoing treatment in a phase i clinical trial: Lessons learned and impact on future clinical research design. *Journal of Oncology Pharmacy Practice*. 2018;24 (2 Supplement 1):8.
76. Higgins P, Ginsburg D, Gilder K, Walsh B, English B, Turner S, et al. Safety and efficacy of olorinab, a peripherally restricted, highly-selective, cannabinoid receptor 2 agonist in a phase 2A study in chronic abdominal pain associated with Crohn's disease. *Journal of Crohn's and Colitis*. 2019;13 (Supplement 1):S318.
77. Hill KP, Hurley-Welljams-Dorof WM. Low to moderate quality evidence demonstrates the potential benefits and adverse events of cannabinoids for certain medical indications. *Evidence Based Medicine*. 2016;21(1):17.
78. Hobart JC, Zajicek JP. Cannabis as a symptomatic treatment for MS: Clinically meaningful MUSEC to the stiffness and walking problems of people with MS. *Multiple Sclerosis*. 2012;1):247.
79. Hoffenberg E, Murphy B, Mikulich-Gilbertson S, McWilliams S, Hoffenberg A, Hopfer C. Why and how adolescents and young adults with inflammatory bowel disease use cannabis. *Journal of Pediatric Gastroenterology and Nutrition*. 2017;65 (Supplement 2):S147-S8.
80. Honarmand K, Tierney MC, O'Connor P, Feinstein A. Effects of cannabis on cognitive function in patients with multiple sclerosis. *Neurology*. 2011;76(13):1153-60.
81. Huestis MA, Elsohly M, Netro W, Barnes A, Gustafson RA, Smith ML. Estimating time of last oral ingestion of cannabis from plasma THC and THCCOOH concentrations. *Therapeutic Drug Monitoring*. 2006;28(4):540-4.
82. Hulgán T, Kingsley P, Koethe J, Sterling T, Patel S. Associations between circulating endocannabinoids and cardio-metabolic factors in HIV-infected persons on antiretroviral therapy: A pilot study. *Antiviral Therapy*. 2014;2):A8.
83. Irving P, Iqbal T, Nwokolo C, Subramanian S, Bloom S, Prasad N, et al. Trial to assess cannabidiol in the symptomatic treatment of ulcerative colitis. *Gut*. 2015;1):A430.
84. Isrctn. A one year open label assessment of the use of nabilone in the treatment of chronic neuropathic pain. <http://www.who.int/trialssearch/Trial2.aspx?TrialID=ISRCTN38408594>. 2007.

85. Jamal N, Korman J, Musing M, Malavade A, Coleman BL, Siddiqui N, et al. The effect of preoperative cannabis use on opioid consumption following surgery: A cohort analysis. *Canadian Journal of Hospital Pharmacy*. 2018;71 (1):73.
86. Kalu N, O'Neal PA, Nwokolo C, Diaz S, Owoyemi O. The use of marijuana and hydroxyurea among sickle cell patients. *Blood Conference: 58th Annual Meeting of the American Society of Hematology, ASH*. 2016;128(22).
87. Kanaan AS, Muller-Vahl KR. Cannabinoid-based medicines for the treatment of Gilles de la Tourette syndrome. *Handbook of cannabis and related pathologies: Biology, pharmacology, diagnosis, and treatment*. San Diego, CA: Elsevier Academic Press; US; 2017. p. 883-92.
88. Keating GM. Delta-9-Tetrahydrocannabinol/Cannabidiol Oromucosal Spray (Sativex R): A Review in Multiple Sclerosis-Related Spasticity. *Drugs*. 2017;77(5):563-74.
89. Khalid L, Starrels JL, Sohler N, Arnsten JH, Jost J, Cunningham C. Marijuana use is associated with low prescription opioid analgesic (POA) use among hiv-infected patients with chronic pain. *Journal of General Internal Medicine*. 2016;1):S297.
90. Kiszko K, Patel K, Chudasama B, Samodulski J, Nienaber C, Martins-Welch D, et al. Older adults' perspectives on medical marijuana (MM) use. *Journal of the American Geriatrics Society*. 2017;65 (Supplement 1):S70.
91. Klooker T, Leliefeld K, Van Den Wijngaard RM, Boeckstaens GE. The cannabinoid receptor agonist delta-9-tetrahydrocannabinol increases rectal sensitivity in IBS patients and healthy volunteers. *Gastroenterology*. 2009;1):A726-A7.
92. Koehler J, Feneberg W, Gorodetzky H, Meier M, Pollmann W. Clinical experiences with on-label nabiximols therapy in multiple sclerosis-induced spasticity. *Multiple Sclerosis*. 2013;1):281-2.
93. Koehler J, Gorodetzky H, Pollmann W, Meier M, Feneberg W. Monotherapy with nabiximols in multiple sclerosis-induced spasticity. *Multiple Sclerosis*. 2013;1):282.
94. Laux L, Devinsky O, Miller I, Nabbout R, Zolnowska M, Wright S, et al. Maintenance of long-term safety and efficacy of cannabidiol (CBD) treatment in dravet syndrome (DS): Results of the open-label extension (OLE) trial (GWPCARE5). *Annals of Neurology*. 2018;84 (Supplement 22):S344.
95. Leehey M, Liu Y, Epstein C, Hart F, Bainbridge J, Cook M, et al. Open label study of cannabidiol in Parkinson's disease. *Movement Disorders*. 2017;32 (Supplement 2):913.
96. Leehey MA, Liu Y, Hart F, Klawitter J, Sempio C, Fischer S, et al. Preliminary findings of the use of cannabis in Parkinson disease. *Movement Disorders*. 2019;34 (Supplement 1):S18-S9.
97. Libzon S, Schleider LB, Saban N, Levit L, Tamari Y, Linder I, et al. Medical Cannabis for Pediatric Moderate to Severe Complex Motor Disorders. *Journal of Child Neurology*. 2018;33(9):565-71.
98. Lindley EM, Razavi-Shearer D, Patel VV, Henry SE, McBeth Z, Burger EL, et al. Medical marijuana use characteristics in patients with chronic spine pain disorders. *Spine Journal*. 2013;1):845.
99. Lissoni P, Porro G, Messina G, Porta E, Rovelli F, Roselli MG, et al. Morphine, melatonin, Marijuana, Magnolia and MYRRH as the "five m" schedule in the treatment of cancer pain and the

- possible dose-dependency of the antitumor and analgesic effects of the pineal hormone melatonin. *Anticancer Research*. 2014;34 (10):6033-4.
100. Lothe C. The painful truth. *Nursing Standard*. 1999;13(52):25.
101. Lockett T, Agar M, Chye R, Lintzeris N, McGregor I, Allsop D, et al. Medicinal cannabis use and preferred mode of administration: Preliminary results from an anonymous patient survey to inform medicinal cannabis phase II and III trials for cancer-related anorexia-cachexia. *Palliative Medicine*. 2016;30 (6):NP88.
102. Macari D, Gbadamosi B, Ezekwudo D, Khoury J, Jaiyesimi IA, Gaikazian SS. Medical cannabis in cancer patients: Prevalence, efficacy, and safety. *Journal of Clinical Oncology Conference*. 2019;37(Supplement 15).
103. Maggioli C, Giannone FA, Baldassarre M, Fanelli F, Mezzullo M, Belluomo I, et al. Endocannabinoids in advanced cirrhosis: Have we picked the right one? *Digestive and Liver Disease*. 2012;1):S40.
104. Malfitano AM, Laezza C, D'Alessandro A, Procaccini C, Saccomanni G, Tuccinardi T, et al. Effects on immune cells of a new 1,8-naphthyridin-2-one derivative and its analogues as selective CB2 agonists: implications in multiple sclerosis. *PLoS ONE [Electronic Resource]*. 2013;8(5):e62511.
105. Martellucci I, Laera L, Lippi S, Marsili S, Petrioli R, Francini G. Impact of cannabinoids on the quality of life in oncology: Prospective observational study. *Annals of Oncology Conference: 17th National Congress of Medical Oncology Rome Italy Conference Publication*:. 2015;26(SUPPL. 6).
106. Mbachi C, Wang Y, Barkin JA, Demetria MV, Barkin JS, Kroner PT, et al. Does cannabis consumption impact chronic pancreatitis related complications? *American Journal of Gastroenterology*. 2019;114 (Supplement):S21-S2.
107. McVige J, Bargnes VH, Shukri S, Mechtler L. Cannabis, concussion, and chronic pain: An ongoing retrospective analysis at Dent Neurologic Institute in Buffalo, NY. *Neurology*. 2018;91 (23 Supplement 1):S18-S9.
108. McLeod SA, Lemay JF. Medical cannabinoids. *CMAJ Canadian Medical Association Journal*. 2017;189(30):E995.
109. McQuay HJ. More evidence cannabis can help in neuropathic pain. *CMAJ Canadian Medical Association Journal*. 2010;182(14):1494-5.
110. McVige J, Kaur D, Hart P, Lillis M, Mechtler L, Bargnes V, et al. Medical cannabis in the treatment of post-traumatic concussion. *Neurology Conference: 71st Annual Meeting of the American Academy of Neurology, AAN*. 2019;92(15 Supplement 1).
111. Mechtler L, Bargnes V, Hart P, McVige J, Saikali N. Medical cannabis for chronic migraine: A retrospective review. *Neurology Conference: 71st Annual Meeting of the American Academy of Neurology, AAN*. 2019;92(15 Supplement 1).

112. Mechtler L, Hart P, Bargnes V, Saikali N. Medical cannabis treatment in patients with trigeminal neuralgia. *Neurology Conference: 71st Annual Meeting of the American Academy of Neurology, AAN.* 2019;92(15 Supplement 1).
113. Melen CM, Merrien M, Wasik A, Sonnevi K, Junlen HR, Christersson B, et al. A clinical trial of cannabis as targeted therapy for indolent leukemic lymphoma. *Blood Conference: 61st Annual Meeting of the American Society of Hematology, ASH.* 2019;134(Supplement 1).
114. Melen CM, Merrien M, Wasik AM, Sonnevi K, Junlen H, Christensson B, et al. The cannabinoid study-01: Investigating the effects of cannabinoids in indolent leukemic B-cell lymphoma. *Hematological Oncology.* 2019;37 (Supplement 2):572.
115. Mesquita B, Ferreira G, Corral LL, Riviera D, Pita A, Carrillo J, et al. Cannabinoids in the management of chronic GVHD - Experience of a center. *Bone Marrow Transplantation.* 2017;52 (Supplement 1):233.
116. Messenheimer JA, O'Brien T, Berkovic S, French J, Bonn-Miller M, Gutterman D. Transdermal cannabidiol (CBD) gel for the treatment of focal epilepsy in adults. *Neurology.* 2018;90 (24):e2188.
117. Milstein SL, MacCannell K, Karr G, Clark S. Marijuana-produced changes in pain tolerance. Experienced and non-experienced subjects. *International pharmacopsychiatry.* 1975;10(3):177-82.
118. Miodownik H, Bradford C, Starrels JL, Ogu UO, Thomas M, Cunningham CO, et al. Clinical characteristics and health care utilization patterns of sickle cell disease patients using marijuana. *Blood Conference: 60th Annual Meeting of the American Society of Hematology, ASH.* 2018;132(Suppl. 1).
119. Mirman J. Why we need to legalize medical marijuana. One more potential therapy. *Minnesota Medicine.* 2014;97(4):38.
120. Moreno M, Vaillancourt R, Pouliot A, Sell E, Hevenor B, Viracoumarane K. A survey of the use of cannabis in children at a tertiary teaching hospital. *Canadian Journal of Hospital Pharmacy.* 2018;71 (1):72.
121. Morera C. Palmitoylethanolamide (PEA) for sciatic pain associated to usual treatment. *Pain Practice.* 2012;1):88-9.
122. Morrison G, Sardu ML, Rasmussen CH, Sommerville K, Roberts C, Blakey GE. Exposure-response analysis of cannabidiol for the treatment of lennox-gastaut syndrome. *Epilepsia.* 2018;59 (Supplement 3):S11-S2.
123. Morrison G, Sardu ML, Rasmussen CH, Sommerville K, Roberts C, Blakey GE. Exposure-Response Analysis of Cannabidiol (CBD) oral solution for the treatment of lennox-gastaut syndrome. *Neurology Conference: 70th Annual Meeting of the American Academy of Neurology, AAN.* 2018;90(15 Supplement 1).
124. Mousa A, Petrovic M, Laszlo S, Fleshner N. Is there a therapeutic role for cannabis in advanced prostate cancer? Exploring the patterns and predictors of use among men receiving androgen-deprivation therapy. *Canadian Urological Association Journal.* 2018;12 (6 Supplement 2):S126.

125. Mupamombe CT, Nathan RA, Case AA, Walter M, Hansen E. Efficacy of medical cannabis for cancer-related pain in the elderly: A single-center retrospective analysis. *Journal of Clinical Oncology Conference*. 2019;37(31 Supplement 1).
126. Myers B, Geist T, Hart P, Aladeen T, Begley A, Westphal ES, et al. Medical cannabis in the treatment of parkinson's disease. *Neurology Conference: 71st Annual Meeting of the American Academy of Neurology, AAN*. 2019;92(15 Supplement 1).
127. Nadal X, Del Rio C, Casano S, Palomares B, Ferreiro-Vera C, Navarrete C, et al. Tetrahydrocannabinolic acid is a potent PPARgamma agonist with neuroprotective activity. *British Journal of Pharmacology*. 2017;174(23):4263-76.
128. Naftali T, Bar Lev Schlieder L, Hirsch J, Lish I, Benjaminov F, Konikoff F. Cannabis use patterns in patients with IBD. *Journal of Crohn's and Colitis*. 2016;10 (Supplement 1):S375-S6.
129. Naftali T, Bar Lev Schlieder L, Sklerovsky Benjaminov F, Lish I, Hirsch J, Konikoff FM. Cannabis induces clinical and endoscopic improvement in moderately active ulcerative colitis (UC). *Journal of Crohn's and Colitis*. 2018;12 (Supplement 1):S306.
130. Naftali T, Bar-Lev L, Gabay G, Chowers Y, Dotan I, Bronshtein M, et al. Tetrahydrocannabinol (THC) rich medical cannabis induces clinical and biochemical improvement with a steroid sparing effect in active crohn's disease. *Gastroenterology*. 2012;1):S780.
131. Naftali T, Barlev L, Gabay G, Chowers Y, Dotan I, Stein A, et al. Tetrahydrocannabinol (THC) induces clinical and biochemical improvement with a steroid sparing effect in active inflammatory bowel disease. *Journal of Crohn's and Colitis*. 2013;7 (SUPPL.1):S153.
132. Nathan RA, Tonderai C, Mupamombe, Walter M, Case AA, Hansen E. Use of medical cannabis in treating anorexia and nausea in elderly cancer patients. *Journal of Clinical Oncology Conference*. 2019;37(31 Supplement 1).
133. Nauck F, Klaschik E. [Dronabinol (delta9-tetrahydrocannabinol) in long-term treatment. Symptom control in patients with multiple sclerosis and spasticity, neuropathic pain, loss of appetite and cachexia]. *Der Schmerz*. 2004;18 Suppl 2:S26-30.
134. Nct. Study to Evaluate the Efficacy of Dronabinol (Marinol) as Add-On Therapy for Patients on Opioids for Chronic Pain. <https://clinicaltrials.gov/show/NCT00153192>. 2005.
135. Nct. Medicinal Cannabis for Painful HIV Neuropathy. <https://clinicaltrials.gov/show/NCT00255580>. 2005.
136. Nct. Supporting Effect of Dronabinol on Behavioral Therapy in Fibromyalgia and Chronic Back Pain. <https://clinicaltrials.gov/show/NCT00176163>. 2005.
137. Nct. Nabilone Versus Amitriptyline in Improving Quality of Sleep in Patients With Fibromyalgia. <https://clinicaltrials.gov/show/NCT00381199>. 2006.
138. Nct. MULTIPLE Sclerosis and Extract of Cannabis (MUSEC) Study. <https://clinicaltrials.gov/show/NCT00552604>. 2007.



139. Nct. Efficacy and Safety Evaluation of Nabilone as Adjunctive Therapy to Gabapentin for the Management of Neuropathic Pain in Multiple Sclerosis. Clinicaltrials gov, national institutes of health [<http://www.clinicaltrials.gov>]. 2007.
140. Nct. A Study to Determine the Maintenance of Effect After Long-term Treatment of Sativex® in Subjects With Neuropathic Pain. <https://clinicaltrials.gov/show/NCT00713817>. 2008.
141. Nct. Prevention of Postoperative Nausea and Vomiting (PONV) in Surgical Patients. <https://clinicaltrials.gov/show/NCT00757822>. 2008.
142. Nct. Sativex for Treatment of Chemotherapy Induced Neuropathic Pain. <https://clinicaltrials.gov/show/NCT00872144>. 2009.
143. Nct. Efficacy and Safety of the Pain Relieving Effect of Dronabinol in Central Neuropathic Pain Related to Multiple Sclerosis. Clinicaltrials gov, national institutes of health [<http://www.clinicaltrials.gov>]. 2009.
144. Nct. A Study of the Safety and Effectiveness of Sativex®<sup>®</sup>, for the Relief of Symptoms of Spasticity in Subjects With Multiple Sclerosis (MS). Clinicaltrials gov, national institutes of health [<http://www.clinicaltrials.gov>]. 2010.
145. Nct. Palmitoylethanolamide for Post-operative Pain Prevention. <https://clinicaltrials.gov/show/NCT01491191>. 2011.
146. Nct. Efficacy Study of Δ9-THC to Treat Chronic Abdominal Pain. <https://clinicaltrials.gov/show/NCT01318369>. 2011.
147. Nct. Vaporized Cannabis and Spinal Cord Injury Pain. <https://clinicaltrials.gov/show/NCT01555983>. 2012.
148. Nct. Δ9-THC (Namisol®) in Chronic Pancreatitis Patients Suffering From Persistent Abdominal Pain. <https://clinicaltrials.gov/show/NCT01551511>. 2012.
149. Nct. A Study of Cannabis Based Medicine Extracts and Placebo in Patients With Pain Due to Spinal Cord Injury. <https://clinicaltrials.gov/show/NCT01606202>. 2012.
150. Nct. Safety and Efficacy Study of Dronabinol to Treat Obstructive Sleep Apnea. <https://clinicaltrials.gov/show/NCT01755091>. 2012.
151. Nct. Vaporized Cannabis for Chronic Pain Associated With Sickle Cell Disease. <https://clinicaltrials.gov/show/NCT01771731>. 2013.
152. Nct. Combined THC and CBD Drops for Treatment of Crohn's Disease. <https://clinicaltrials.gov/show/NCT01826188>. 2013.
153. Nct. Phase 1 Study to Study the Efficacy and Safety of Cannabis in the Treatment of Tinnitus. Clinicaltrials.gov [[www.clinicaltrials.gov](http://www.clinicaltrials.gov)]. 2013.
154. Nct. Safety and Efficacy of Nabilone in Alzheimer's Disease. <http://clinicaltrials.gov/show/NCT02351882>. 2014.

155. Nct. Cannabidiol Oral Solution as an Adjunctive Therapy for Treatment of Participants With Inadequately Controlled Dravet Syndrome. <https://clinicaltrials.gov/show/NCT02318563>. 2014.
156. Nct. Cannabidiol Oral Solution as an Adjunctive Therapy for Treatment of Participants With Inadequately Controlled Lennox-Gastaut Syndrome. <https://clinicaltrials.gov/show/NCT02318537>. 2014.
157. Nct. Cannabinoid Profile Investigation of Vapourized Cannabis in Patients With Osteoarthritis of the Knee. <https://clinicaltrials.gov/show/NCT02324777>. 2014.
158. Nct. Investigation of Cannabinoid Receptor Agonist Dronabinol in Patients With Functional Chest Pain. <https://clinicaltrials.gov/show/NCT02569073>. 2015.
159. Nct. The Safety, Tolerability and Efficacy of Dronabinol, for the Treatment of Nausea and Vomiting in Familial Dysautonomia. <https://clinicaltrials.gov/show/NCT02608931>. 2015.
160. Nct. Trial of Dronabinol and Vaporized Cannabis in Neuropathic Low Back Pain. <https://clinicaltrials.gov/show/NCT02460692>. 2015.
161. Nct. The Effects of Cannabis on Dystonia and Spasticity on Pediatric Patients. <https://clinicaltrials.gov/show/NCT02470325>. 2015.
162. Nct. Evaluating Safety and Efficacy of Cannabis in Participants With Chronic Posttraumatic Stress Disorder. <https://clinicaltrials.gov/show/NCT02517424>. 2015.
163. Nct. Nabilone Effect on the Attenuation of Anorexia, Nutritional Status and Quality of Life in Lung Cancer Patients. <https://clinicaltrials.gov/show/NCT02802540>. 2016.
164. Nct. Cannabidiol Oral Solution for the Treatment of Subjects With Prader-Willi Syndrome. <https://clinicaltrials.gov/show/NCT02844933>. 2016.
165. Nct. Investigation of Cannabis for Chronic Pain and Palliative Care. <https://clinicaltrials.gov/show/NCT02683018>. 2016.
166. Nct. Effect of Cannabis and Endocannabinoids on HIV Neuropathic Pain. <https://clinicaltrials.gov/show/NCT03099005>. 2017.
167. Nct. Cannabis Oil for Pain in Parkinson's Disease. <https://clinicaltrials.gov/show/NCT03639064>. 2018.
168. Nct. A Study to Assess the Efficacy, Safety, and Tolerability of Cannabidiol Oral Solution With Vigabatrin as Initial Therapy in Participants With Infantile Spasms. <https://clinicaltrials.gov/show/NCT03421496>. 2018.
169. Nct. A Study to Examine the Efficacy of a Therapeutic THX-110 for Tourette Syndrome. <https://clinicaltrials.gov/show/NCT03651726>. 2018.
170. Nct. Cannabis For Cancer-Related Symptoms. <https://clinicaltrials.gov/show/NCT03948074>. 2019.

171. Nct. A Phase 2a Study to Evaluate the Safety, Tolerability and Efficacy of Cannabidiol as a Steroid-sparing Therapy in Steroid-dependent Crohn's Disease Patients. <https://clinicaltrials.gov/show/NCT04056442>. 2019.
172. Nct. Cannabinoids and an Anti-inflammatory Diet for the Treatment of Neuropathic Pain After Spinal Cord Injury. <https://clinicaltrials.gov/show/NCT04057456>. 2019.
173. Nct. Efficacy and Safety of Dronabinol in the Improvement of Chemotherapy-induced and Tumor-related Symptoms in Advanced Pancreatic Cancer. <https://clinicaltrials.gov/show/NCT03984214>. 2019.
174. Nct. Study to Investigate the Efficacy and Safety of Cannabis Oil for the Treatment of Subjects With Hidradenitis Suppurativa. <https://clinicaltrials.gov/show/NCT03929835>. 2019.
175. Nct. Pain Response to Cannabidiol in Induced Acute Nociceptive Pain, Allodynia and Hyperalgesia By Using a Model Mimicking Acute Pain in Healthy Adults. <https://clinicaltrials.gov/show/NCT03985995>. 2019.
176. Nct. Efficacy and Safety of Cannabidiol for Gastroparesis and Functional Dyspepsia. <https://clinicaltrials.gov/show/NCT03941288>. 2019.
177. Ngan TYT, Litt M, Eguzo K, Thiel JA. Patient Outcomes Following Initiation of Medical Cannabis in Women with Chronic Pelvic Pain. *Journal of Minimally Invasive Gynecology*. 2019;26 (7 Supplement):S89-S90.
178. Nickels K. Cannabidiol in patients with intractable epilepsy due to TSC: A possible medication but not a miracle. *Epilepsy Currents*. 2017;17(2):91-2.
179. Nicolodi M, Pinnaro MS, Sandoval V. Selected cannabinoids and cutaneous allodynia in chronic refractory migraine. *Journal of Headache and Pain Conference: 12th European Headache Federation Congress and the 32nd National Congress of the Italian Society for the Study of Headaches Italy*. 2018;19(Supplement 1).
180. Nicolodi M, Pinnaro MS, Sandoval V, Torrini A. Possible effects, side-effects and adverse events of a selective cannabinoid (6% THC/7.5% CBD) in refractory chronic migraine. 2013-2018 pilot data. *Journal of Headache and Pain Conference: 12th European Headache Federation Congress and the 32nd National Congress of the Italian Society for the Study of Headaches Italy*. 2018;19(Supplement 1).
181. Nicolodi M, Sandoval V, Torrini A. Therapeutic use of cannabinoids-dose finding, effects and pilot data of effects in chronic migraine and cluster headache. *European Journal of Neurology*. 2017;24 (Supplement 1):287.
182. Nikles CJ, Yelland M, Glasziou PP, Del Mar C. Do individualized medication effectiveness tests (n-of-1 trials) change clinical decisions about which drugs to use for osteoarthritis and chronic pain? *American Journal of Therapeutics*. 2005;12(1):92-7.
183. Notcutt W, Phillips C, Hughes J, Lacoux P, Vijayakulasingam V, Baldock L. A retrospective description of the use of nabilone in UK clinical practice. *Multiple Sclerosis*. 2014;1):468.

184. Patel A, Gil-Nagel A, Chin R, Mitchell W, Perry MS, Weinstock A, et al. Long-term safety and efficacy of add-on cannabidiol (CBD) treatment in patients with lennox gastaut syndrome in an openlabel extension trial (GWPCARE5). *Neurology Conference: 71st Annual Meeting of the American Academy of Neurology, AAN*. 2019;92(15 Supplement 1).
185. Patel A, Gil-Nagel A, Chin R, Mitchell W, Perry MS, Weinstock A, et al. Long-term safety and efficacy of add-on cannabidiol treatment in patients with Lennox Gastaut syndrome in an open-label extension trial (GWPCARE5). *Developmental Medicine and Child Neurology*. 2019;61 (Supplement 1):13.
186. Patti F, Chisari C, D'Amico E, Solaro C, Arena S, Annunziata P, et al. Long-term effectiveness of 9-delta-tetrahydrocannabinol:Cannabidiol oromucosal spray in clinical practice: Results from a 18-months multicenter Italian study. *Neurology Conference: 71st Annual Meeting of the American Academy of Neurology, AAN*. 2019;92(15 Supplement 1).
187. Patti F, Messina S, Amato MP, Benedetti MD, Bergamaschi R, Bertolotto A, et al. Multicenter, prospective, observational study aimed at evaluating SATivex effEcts (effectiveness and tolerability) in a large population of Italian multiple sclerosis patients: SA.FE. Study. *Multiple Sclerosis*. 2015;1):613-5.
188. Perello Alonso M, Ivanov P. [Pain, cannabis, psychosis. A logical sequence?]. *Revista Espanola de Geriatria y Gerontologia*. 2017;52(6):350-1.
189. Pires C, Lachiewicz M. A pilot survey of marijuana use and self-reported benefit in women with chronic pelvic pain. *Pain Medicine (United States)*. 2018;19 (4):890.
190. Plummer R, Anthoney A, Evans J, Haris N, D'Archangelo M, Slater S, et al. A phase I dose escalation study to assess the safety tolerability and pharmacokinetics of ETS2101 in patients (pts) with advanced solid tumours. *European Journal of Cancer*. 2015;3):S58-S9.
191. Poli P, Salvadori C, Sannino C. Effects of cannabis based drugs on chronic neuropathic pain: Comparison between italian and dutch medical cannabis variety. *Pain Practice*. 2018;18 (Supplement 1):101.
192. Quintans JS, Antoniulli AR, Almeida JR, Santana-Filho VJ, Quintans-Junior LJ. Natural products evaluated in neuropathic pain models - a systematic review. *Basic & Clinical Pharmacology & Toxicology*. 2014;114(6):442-50.
193. Reisfield GM. Medical cannabis and chronic opioid therapy. *Journal of Pain & Palliative Care Pharmacotherapy*. 2010;24(4):356-61.
194. Reznik I. Post-traumatic stress disorder and medical cannabis use: A naturalistic observational study. *European Neuropsychopharmacology*. 2012;2):S363-S4.
195. Reznik I. Medical marijuana/cannabis treatment of Tourette's syndrome: Focus on the quality of life. *European Neuropsychopharmacology*. 2014;2):S645-S6.
196. Robinson D, Garti A, Yassin M. Cannabis treatment of diabetic neuropathy: Treatment effect and change in health over a 6 month period. *Foot and Ankle Surgery*. 2016;1):58.
197. Ron A, Abuhasira R, Novack V. Establishment of a specialized geriatric clinic providing medical cannabis. *Journal of the American Geriatrics Society*. 2019;67 (Supplement 1):S299.

198. Roy A, Konda M, Goel A, Sasapu A. Characteristics of marijuana usage in sickle cell patients. *Journal of Investigative Medicine*. 2020;68 (2):646.
199. Roy AM, Konda M, Goel A, Sasapu A. Characteristics of marijuana usage in sickle cell patients: A nationwide analysis. *Blood Conference: 61st Annual Meeting of the American Society of Hematology, ASH*. 2019;134(Supplement 1).
200. Russo EB, Killestein J, Uitdehaag BMJ, Polman CH. Safety, tolerability, and efficacy of orally administered cannabinoids in MS (multiple letters). *Neurology*. 2003;60(4):729-30.
201. Sacca F, Pane C, Carotenuto A, Massarelli M, Lanzillo R, Florio EB, et al. The use of medical-grade Cannabis (Bedrocane<sup>®</sup>) in patients non-responders to nabiximols (sativex<sup>®</sup>). *Multiple sclerosis (houndsbills, basingstoke, england)*. 2016;22:686-.
202. Sallan S, Zinberg N, Frei E. Oral delta 9 tetrahydrocannabinol (THC) in the prevention of vomiting (V) associated with cancer chemotherapy (CC). *Proceedings of the American Association for Cancer Research*. 1975;16(66):No. 575.
203. Sastre-Garriga J, Vila C, Clissold S, Montalban X. THC and CBD oromucosal spray (Sativex) in the management of spasticity associated with multiple sclerosis. *Expert Review of Neurotherapeutics*. 2011;11(5):627-37.
204. Saxon AJ, Browne KW. Marijuana not ready for prime time as an analgesic. *General Hospital Psychiatry*. 2014;36(1):4-6.
205. Scheffer IE, Halford J, Nababout R, Sanchez-Carpintero R, Shiloh Malawsky Y, Wong M, et al. Long-term safety and efficacy of add-on cannabidiol (CBD) treatment in patients with Dravet syndrome (DS) in an open-label extension (OLE) trial. *Developmental Medicine and Child Neurology*. 2019;61 (Supplement 1):63.
206. Schimpfoss M, Berweck S, Betzler C, Dotzler E, Herberhold T, Pringsheim M, et al. Retrospective analysis of tetrahydrocannabinol based on 31 neurologically critically ill children. *Neuropediatrics Conference: 41st Annual Meeting of the Society of Neuropediatrics Switzerland*. 2015;46(Supplement 1).
207. Schorn M, Krashin D, Mannava A, Belaskova S, Murinova N. Marijuana use in headache in a university-based headache clinic. *Neurology Conference: 71st Annual Meeting of the American Academy of Neurology, AAN*. 2019;92(15 Supplement 1).
208. Seibert SM, Kumar P, Gomez PL, Gomez CN, Miller LM, Logsdon M. Cannabis in cancer patients [CP] to improve quality of life [QOL] and cancer related symptoms [CRS]: Illinois cancer care cannabis education and clinical analysis. *Journal of Clinical Oncology Conference*. 2018;36(15 Supplement 1).
209. Shipton EA, Shipton EE. Should doctors be allowed to prescribe cannabinoids for pain in Australia and New Zealand? *Australian & New Zealand Journal of Psychiatry*. 2014;48(4):310-3.
210. Slaven M, Levine M, Parpia S, Shaw E. An approach to dosing: The cannabis oil in pain effectiveness (COPE) trial. *Medical Cannabis and Cannabinoids*. 2019;2 (2):2.
211. Spittel S, Funke A, Kettemann D, Maier A, Gajewski N, Baldes T, et al. Patients' satisfaction and usability for tetrahydrocannabinol/cannabidiol (THC:CBD) in the treatment of spasticity in patients with

- amyotrophic lateral sclerosis (ALS). *Amyotrophic Lateral Sclerosis and Frontotemporal Degeneration*. 2018;19 (Supplement 1):376.
212. Stern P, Roberts L. The future of pain research. *Science*. 2016;354(6312):564-5.
213. Sutton IR, Daeninck P. Cannabinoids in the management of intractable chemotherapy-induced nausea and vomiting and cancer-related pain. *The Journal of Supportive Oncology*. 2006;4(10):531-5.
214. Szaflarski JP, Bebin EM, Gaston T, Grayson L, Liu Y, Cutter G, et al. Improvements in seizure frequency parallel improvements in seizure severity in an open label study of cannabidiol. *Epilepsia*. 2017;58 (Supplement 5):S158.
215. Taha T, Meiri D, Talhamy S, Wollner M, Peer A, Bar-Sela G. Cannabis Impacts Tumor Response Rate to Nivolumab in Patients with Advanced Malignancies. *Oncologist*. 2019;24(4):549-54.
216. Thirlwell C, Rainville K, Miri D, Donath A, Shulman H. New frontiers in treating chronic insomnia in Canadian veterans with PTSD: Retrospective analysis reveals an innovative role for medical cannabis in optimizing sleep/wake health. *Medical Cannabis and Cannabinoids*. 2018;1 (2):126.
217. Tripp D, Nickel JC, Laura K, Ginting JV, Mark W, Santor D. Cannabis (marijuana) use in men with chronic prostatitis / chronic pelvic pain syndrome. *Journal of Urology*. 2012;1):e439-e40.
218. Trojano M. THC:CBD Observational Study Data: Evolution of Resistant MS Spasticity and Associated Symptoms. *European Neurology*. 2016;75 Suppl 1:4-8.
219. Vermersch P, Trojano M. Tetrahydrocannabinol + cannabidiol oromucosal spray for multiple sclerosis resistant spasticity on daily practice, new data. *Multiple Sclerosis*. 2016;22 (Supplement 3):377.
220. Vezyroglou K, Eltze C, Varadkar S, Carr L, O'Sullivan C, Ninnis E, et al. Efficacy and safety of cannabidiol as add-on therapy in drugresistant epilepsy, a single center experience. *European Journal of Paediatric Neurology*. 2017;21 (Supplement 1):e87.
221. Vezyroglou K, Eltze C, Varadkar S, Carr L, Sullivan CO, Ninnis E, et al. Cannabidiol as add on therapy in children with complex epilepsy. *Developmental Medicine and Child Neurology*. 2017;59 (Supplement 1):17.
222. Voelker R. States Move to Substitute Opioids With Medical Marijuana to Quell Epidemic. *JAMA*. 2018;320(23):2408-10.
223. Vorobeichik L, Bhatia A, Buzon-Tan A, Walker S, Kirkham K, Ilangomaran D, et al. Risk factors for failure of Patient-Controlled Oral Analgesia after total hip and knee arthroplasty. *Regional Anesthesia and Pain Medicine Conference: 42nd Annual Regional Anesthesiology and Acute Pain Medicine Meeting, ASRA*. 2017;42(6).
224. Webb CW, Webb SM. Therapeutic benefits of cannabis: a patient survey. *Hawai'i Journal of Medicine & Public Health : A Journal of Asia Pacific Medicine & Public Health*. 2014;73(4):109-11.
225. Werth VP, Hejazi E, Pena S, Haber J, Feng R, Patel B, et al. Study of safety and efficacy of lenabasum, a cannabinoid receptor type 2 agonist, in refractory skin-predominant dermatomyositis. *Journal of Investigative Dermatology*. 2018;138 (5 Supplement 1):S103.

226. Wilsey B, Marcotte T, Deutsch R, Gouaux B, Sakai S, Donaghe H. Low-dose vaporized cannabis significantly improves neuropathic pain. *Journal of Pain*. 2013;14(2):136-48.
227. Wilsey B, Marcotte T, Tsodikov A, Millman J, Bentley H, Gouaux B, et al. A randomized, placebo-controlled, crossover trial of cannabis cigarettes in neuropathic pain. *Journal of Pain*. 2008;9(6):506-21.
228. Wilson M, Masterson E, Broglio K. Cannabis Use Among Patients Prescribed Opioids in a Palliative Care Clinic (S875). *Journal of Pain and Symptom Management*. 2019;57 (2):522.
229. Wilson MM, Masterson E, Broglio K. Cannabis Use among Patients in a Rural Academic Palliative Care Clinic. *Journal of Palliative Medicine*. 2019;22(10):1224-6.
230. Wirrell E, Privitera M, Bhathal H, Wong M, Cross J, Sommerville K. Cannabidiol (CBD) treatment effect and adverse events (AES) by time in patients with lennox-gastaut syndrome (LGS): Pooled results from 2 trials. *Annals of Neurology*. 2018;84 (Supplement 22):S341.
231. Wright S, Etges T. An observational post approval registry study of patients prescribed Sativex. Results from clinical practice. (#14). *Multiple Sclerosis*. 2012;18 (5):S30.
232. Xu JJ, Diaz P, Astruc-Diaz F, Craig S, Munoz E, Naguib M. Pharmacological characterization of a novel cannabinoid ligand, MDA19, for treatment of neuropathic pain. *Anesthesia & Analgesia*. 2010;111(1):99-109.
233. Zajicek J. Cannabinoids on trial for multiple sclerosis. *Lancet Neurology*. 2002;1(3):147.
234. Zajicek JP, Hobart JC, Slade A, Barnes D, Mattison PG, Group MR. Multiple sclerosis and extract of cannabis: results of the MUSEC trial. *Journal of Neurology, Neurosurgery & Psychiatry*. 2012;83(11):1125-32.
235. Zajicek JP, Sanders HP, Wright DE, Vickery PJ, Ingram WM, Reilly SM, et al. Cannabinoids in multiple sclerosis (CAMS) study: safety and efficacy data for 12 months follow up. *Journal of Neurology, Neurosurgery & Psychiatry*. 2005;76(12):1664-9.
236. Zettl U, Henze T, Pfiffner C, Vila Silvan C, Flachenecker P. Effectiveness of Sativex in multiple sclerosis spasticity. First data from a large observational study in Germany. *Multiple Sclerosis*. 2012;1):246.
237. Zettl UK, Rommer P, Hipp P, Patejdl R. Evidence for the efficacy and effectiveness of THC-CBD oromucosal spray in symptom management of patients with spasticity due to multiple sclerosis. *Therapeutic Advances in Neurological Disorders*. 2016;9(1):9-30.
238. Zhou R, Jacobson C, Weng J, Cheng E, Lay J, Hung P, et al. Potential efficacy of cannabidiol for treatment of refractory infantile spasms and lennox gastaut syndrome. *Epilepsy Currents*. 2015;1):360-1.
239. Ziemssen T. Tetrahydrocannabinol: Cannabidiol oromucosal spray for treating symptoms of multiple sclerosis spasticity: Newest evidence. *Neurodegenerative Disease Management*. 2019;9(2s):1-2.

#### **Study did not include patients with chronic pain**

1. Abuhasira R, Ron A, Sikorin I, Novack V. Medical cannabis for older patients-treatment protocol and initial results. *Journal of Clinical Medicine*. 2019;8 (11) (no pagination)(1819).

2. Adejumo AC, Adegbala OM, Adejumo KL, Bukong TN. Reduced Incidence and Better Liver Disease Outcomes among Chronic HCV Infected Patients Who Consume Cannabis. *Canadian Journal of Gastroenterology and Hepatology*. 2018;2018 (no pagination)(9430953).
3. Allen D. Dronabinol Therapy: Central Nervous System Adverse Events in Adults With Primary Brain Tumors. *Clinical Journal of Oncology Nursing*. 2019;23(1):23-6.
4. Balash Y, Bar-Lev Schleider L, Korczyn AD, Shabtai H, Knaani J, Rosenberg A, et al. Medical Cannabis in Parkinson Disease: Real-Life Patients' Experience. *Clinical Neuropharmacology*. 2017;40(6):268-72.
5. Bar-Lev Schleider L, Mechoulam R, Lederman V, Hilou M, Lencovsky O, Betzalel O, et al. Prospective analysis of safety and efficacy of medical cannabis in large unselected population of patients with cancer. *European Journal of Internal Medicine*. 2018;49:37-43.
6. Bar-Sela G, Vorobeichik M, Drawsheh S, Omer A, Goldberg V, Muller E. The medical necessity for medicinal cannabis: prospective, observational study evaluating the treatment in cancer patients on supportive or palliative care. *Evidence-Based Complementary & Alternative Medicine: eCAM*. 2013;2013:510392.
7. Beal JE, Olson R, Lefkowitz L, Laubenstein L, Bellman P, Yangco B, et al. Long-term efficacy and safety of dronabinol for acquired immunodeficiency syndrome-associated anorexia. *Journal of Pain & Symptom Management*. 1997;14(1):7-14.
8. Bobitt J, Qualls SH, Schuchman M, Wickersham R, Lum HD, Arora K, et al. Qualitative Analysis of Cannabis Use Among Older Adults in Colorado. *Drugs & Aging*. 2019;36(7):655-66.
9. Bouso JC, Jimenez-Garrido D, Ona G, Woznica D, Dos Santos RG, Hallak JEC, et al. Quality of Life, Mental Health, Personality and Patterns of Use in Self-Medicating Cannabis Users with Chronic Diseases: A 12-Month Longitudinal Study. *Phytotherapy Research*. 2020;21:21.
10. Boyd CJ, Veliz PT, McCabe SE. Adolescents' Use of Medical Marijuana: A Secondary Analysis of Monitoring the Future Data. *Journal of Adolescent Health*. 2015;57(2):241-4.
11. Bruce D, Brady JP, Foster E, Shattell M. Preferences for Medical Marijuana over Prescription Medications Among Persons Living with Chronic Conditions: Alternative, Complementary, and Tapering Uses. *Journal of Alternative & Complementary Medicine*. 2018;24(2):146-53.
12. Cameron C, Watson D, Robinson J. Use of a synthetic cannabinoid in a correctional population for posttraumatic stress disorder-related insomnia and nightmares, chronic pain, harm reduction, and other indications: a retrospective evaluation. *Journal of Clinical Psychopharmacology*. 2014;34(5):559-64.
13. Carlini BH, Garrett SB, Carter GT. Medicinal Cannabis: A Survey Among Health Care Providers in Washington State. *The American journal of hospice & palliative care*. 2017;34(1):85-91.
14. Chen KA, Farrar M, Cardamone M, Gill D, Smith R, Cowell CT, et al. Cannabidiol for treating drug-resistant epilepsy in children: the New South Wales experience. *Medical Journal of Australia*. 2018;209(5):217-21.



15. Choi NG, DiNitto DM, Marti CN. Nonmedical versus medical marijuana use among three age groups of adults: Associations with mental and physical health status. *American Journal on Addictions*. 2017;26(7):697-706.
16. Clark AJ, Ware MA, Yazer E, Murray TJ, Lynch ME. Patterns of cannabis use among patients with multiple sclerosis. *Neurology*. 2004;62(11):2098-100.
17. Darke S, Duflou J, Farrell M, Peacock A, Lappin J. Characteristics and circumstances of synthetic cannabinoid-related death. *Clinical Toxicology: The Official Journal of the American Academy of Clinical Toxicology & European Association of Poisons Centres & Clinical Toxicologists*. 2019:1-7.
18. Davies BH, Weatherstone RM, Graham JDP, Griffiths RD. A pilot study of orally administered DELTA trans tetrahydrocannabinol in the management of patients undergoing radiotherapy for carcinoma of the bronchus. *BritJClinPharmacol*. 1974;1(4):301-6.
19. Devinsky O, Marsh E, Friedman D, Thiele E, Laux L, Sullivan J, et al. Cannabidiol in patients with treatment-resistant epilepsy: an open-label interventional trial. *Lancet Neurology*. 2016;15(3):270-8.
20. Devinsky O, Marsh E, Friedman D, Thiele E, Laux L, Sullivan J, et al. "Cannabidiol in patients with treatment-resistant epilepsy: An open-label interventional trial": Corrections. *The Lancet Neurology*. 2016;15(4):352.
21. Ebrahimi-Fakhari D, Agricola KD, Tudor C, Krueger D, Franz DN. Cannabidiol Elevates Mechanistic Target of Rapamycin Inhibitor Levels in Patients With Tuberous Sclerosis Complex. *Pediatric Neurology*. 2020;105:59-61.
22. Etges T, Karolia K, Grint T, Taylor A, Lauder H, Daka B, et al. An observational postmarketing safety registry of patients in the UK, Germany, and Switzerland who have been prescribed Sativex (THC: CBD, nabiximols) oromucosal spray. *Therapeutics and Clinical Risk Management*. 2016;12:1667-75.
23. Felix-Ukwu F, Reichert K, Bernhardt MB, Schafer ES, Berger A. Evaluation of aprepitant for acute chemotherapy-induced nausea and vomiting in children and adolescents with acute lymphoblastic leukemia receiving high-dose methotrexate. *Pediatric Blood and Cancer*. 2018;65 (2) (no pagination)(e26857).
24. Ferre L, Nuara A, Pavan G, Radaelli M, Moiola L, Rodegher M, et al. Efficacy and safety of nabiximols (Sativex) on multiple sclerosis spasticity in a real-life Italian monocentric study. *Neurological Sciences*. 2016;37(2):235-42.
25. Flachenecker P, Henze T, Zettl UK. Nabiximols (THC/CBD Oromucosal Spray, Sativex) in clinical practice - results of a multicenter, non-interventional study (MOVE 2) in patients with multiple sclerosis spasticity. *European Neurology*. 2014;71(5-6):271-9.
26. Freeman JL. Safety of cannabidiol prescribed for children with refractory epilepsy. *Medical Journal of Australia*. 2018;209(5):228-9.
27. Gazibara T, Prpic M, Maric G, Pekmezovic T, Kusic-Tepavcevic D. Medical Cannabis in Serbia: The Survey of Knowledge and Attitudes in an Urban Adult Population. *Journal of Psychoactive Drugs*. 2017;49(3):217-24.

28. Gorter RW, Butorac M, Cobian EP, van der Sluis W. Medical use of cannabis in the Netherlands. *Neurology*. 2005;64(5):917-9.
29. Goulet-Stock S, Rueda S, Vafaei A, Ialomiteanu A, Manthey J, Rehm J, et al. Comparing Medical and Recreational Cannabis Users on Socio-Demographic, Substance and Medication Use, and Health and Disability Characteristics. *European Addiction Research*. 2017;23(3):129-35.
30. Grella CE, Rodriguez L, Kim T. Patterns of medical marijuana use among individuals sampled from medical marijuana dispensaries in los angeles. *Journal of Psychoactive Drugs*. 2014;46(4):267-75.
31. Gulbransen G, Xu W, Arroll B. Cannabidiol prescription in clinical practice: an audit on the first 400 patients in New Zealand. *Bjgp Open*. 2020;04:04.
32. Hausman-Kedem M, Menascu S, Kramer U. Efficacy of CBD-enriched medical cannabis for treatment of refractory epilepsy in children and adolescents - An observational, longitudinal study. *Brain & Development*. 2018;40(7):544-51.
33. Hermanns-Clausen M, Kneisel S, Szabo B, Auwarter V. Acute toxicity due to the confirmed consumption of synthetic cannabinoids: clinical and laboratory findings. *Addiction*. 2013;108(3):534-44.
34. Highet BH, Lesser ER, Johnson PW, Kaur JS. Tetrahydrocannabinol and Cannabidiol Use in an Outpatient Palliative Medicine Population. *American Journal of Hospice & Palliative Medicine*. 2020:1049909119900378.
35. Hussain SA, Zhou R, Jacobson C, Weng J, Cheng E, Lay J, et al. Perceived efficacy of cannabidiol-enriched cannabis extracts for treatment of pediatric epilepsy: A potential role for infantile spasms and Lennox-Gastaut syndrome. *Epilepsy & Behavior*. 2015;47:138-41.
36. Johnson-Sasso CP, Tompkins C, Kao DP, Walker LA. Marijuana use and short-term outcomes in patients hospitalized for acute myocardial infarction. *PLoS ONE*. 2018;13 (7) (no pagination)(e0199705).
37. Khelemsky Y, Goldberg AT, Hurd YL, Winkel G, Ninh A, Qian L, et al. Perioperative Patient Beliefs Regarding Potential Effectiveness of Marijuana (Cannabinoids) for Treatment of Pain: A Prospective Population Survey. *Regional Anesthesia & Pain Medicine*. 2017;42(5):652-9.
38. Klotz KA, Grob D, Hirsch M, Metternich B, Schulze-Bonhage A, Jacobs J. Efficacy and Tolerance of Synthetic Cannabidiol for Treatment of Drug Resistant Epilepsy. *Frontiers in Neurology*. 2019;10 (no pagination)(1313).
39. Koehler J, Feneberg W, Meier M, Pollmann W. Clinical experience with THC:CBD oromucosal spray in patients with multiple sclerosis-related spasticity. *International Journal of Neuroscience*. 2014;124(9):652-6.
40. Kolansky H, Moore WT. Toxic effects of chronic marihuana use. *JAMA*. 1972;222(1):35-41.
41. Krceviski-Skvarc N, Wells C, Hauser W. Availability and approval of cannabis-based medicines for chronic pain management and palliative/supportive care in Europe: A survey of the status in the chapters of the European Pain Federation. *European Journal of Pain*. 2018;22(3):440-54.

42. Lagae L, Schoonjans AS, Gammaitoni AR, Galer BS, Ceulemans B. A pilot, open-label study of the effectiveness and tolerability of low-dose ZX008 (fenfluramine HCl) in Lennox-Gastaut syndrome. *Epilepsia*. 2018;59(10):1881-8.
43. Laux LC, Bebin EM, Checketts D, Chez M, Flamini R, Marsh ED, et al. Long-term safety and efficacy of cannabidiol in children and adults with treatment-resistant Lennox-Gastaut syndrome or Dravet syndrome: Expanded access program results. *Epilepsy Research*. 2019;154:13-20.
44. Leconte M, Nicco C, Ngo C, Arkwright S, Chereau C, Guibourdenche J, et al. Antiproliferative effects of cannabinoid agonists on deep infiltrating endometriosis. *American Journal of Pathology*. 2010;177(6):2963-70.
45. Liebrechts N, Benschop A, van der Pol P, Van Laar M, De Graaf R, Van den Brink W, et al. Cannabis dependence and peer selection in social networks of frequent users. *Contemporary Drug Problems: An Interdisciplinary Quarterly*. 2011;38(1):93-120.
46. Lim M, Kirchoff MG. Dermatology-Related Uses of Medical Cannabis Promoted by Dispensaries in Canada, Europe, and the United States. *Journal of Cutaneous Medicine & Surgery*. 2019;23(2):178-84.
47. Lorente Fernandez L, Monte Boquet E, Perez-Miralles F, Gil Gomez I, Escutia Roig M, Bosca Blasco I, et al. Clinical experiences with cannabinoids in spasticity management in multiple sclerosis. [Spanish]. *Neurologia*. 2014;29(5):257-60.
48. Luckett T, Phillips J, Lintzeris N, Allsop D, Lee J, Solowij N, et al. Clinical trials of medicinal cannabis for appetite-related symptoms from advanced cancer: a survey of preferences, attitudes and beliefs among patients willing to consider participation. *Internal Medicine Journal*. 2016;46(11):1269-75.
49. Marcellin F, Lions C, Rosenthal E, Roux P, Sogni P, Wittkop L, et al. No significant effect of cannabis use on the count and percentage of circulating CD4 T-cells in HIV-HCV co-infected patients (ANRS CO13-HEPAVIH French cohort). *Drug & Alcohol Review*. 2017;36(2):227-38.
50. McCabe SE, West BT, Veliz P, Frank KA, Boyd CJ. Social contexts of substance use among U.S. high school seniors: A multicohort national study. *Journal of Adolescent Health*. 2014;55(6):842-4.
51. Michalski CW, Laukert T, Sauliunaite D, Pacher P, Bergmann F, Agarwal N, et al. Cannabinoids ameliorate pain and reduce disease pathology in cerulein-induced acute pancreatitis. *Gastroenterology*. 2007;132(5):1968-78.
52. Milloy MJ, Marshall B, Kerr T, Richardson L, Hogg R, Guillemi S, et al. High-intensity cannabis use associated with lower plasma human immunodeficiency virus-1 RNA viral load among recently infected people who use injection drugs. *Drug & Alcohol Review*. 2015;34(2):135-40.
53. Mitelpunkt A, Kramer U, Hausman Kedem M, Zilbershot Fink E, Orbach R, Chernuha V, et al. The safety, tolerability, and effectiveness of PTL-101, an oral cannabidiol formulation, in pediatric intractable epilepsy: A phase II, open-label, single-center study. *Epilepsy and Behavior*. 2019;Part A. 98:233-7.
54. Mousa A, Petrovic M, Fleshner NE. Prevalence and predictors of cannabis use among men receiving androgen-deprivation therapy for advanced prostate cancer. *Canadian Urological Association Journal*. 2020;14(1):E20-E6.

55. Nordmann S, Vilotitch A, Roux P, Esterle L, Spire B, Marcellin F, et al. Daily cannabis and reduced risk of steatosis in human immunodeficiency virus and hepatitis C virus-co-infected patients (ANRS CO13-HEPAVIH). *Journal of Viral Hepatitis*. 2018;25(2):171-9.
56. Notcutt WG. A questionnaire survey of patients and carers of patients prescribed Sativex as an unlicensed medicine. *Primary Health Care Research & Development*. 2013;14(2):192-9.
57. Novotna A, Mares J, Ratcliffe S, Novakova I, Vachova M, Zapletalova O, et al. A randomized, double-blind, placebo-controlled, parallel-group, enriched-design study of nabiximols (Sativex( R) ), as add-on therapy, in subjects with refractory spasticity caused by multiple sclerosis. *European Journal of Neurology*. 2011;18(9):1122-31.
58. Ofir R, Bar-Sela G, Weyl Ben-Arush M, Postovsky S. Medical marijuana use for pediatric oncology patients: single institution experience. *Pediatric Hematology & Oncology*. 2019;36(5):255-66.
59. Palmieri B, Laurino C, Vadala M. A therapeutic effect of cbd-enriched ointment in inflammatory skin diseases and cutaneous scars. *Clinica Terapeutica*. 2019;170(2):e93-e9.
60. Paolicelli D, Direnzo V, Manni A, D'Onghia M, Tortorella C, Zoccolella S, et al. Long-Term Data of Efficacy, Safety, and Tolerability in a Real-Life Setting of THC/CBD Oromucosal Spray-Treated Multiple Sclerosis Patients. *Journal of Clinical Pharmacology*. 2016;56(7):845-51.
61. Patel VP, Feinstein A. Cannabis and cognitive functioning in multiple sclerosis: The role of gender. *Multiple Sclerosis Journal Experimental Translational & Clinical*. 2017;3(2):2055217317713027.
62. Patti F. Health Authorities Data Collection of THC:CBD Oromucosal Spray (L'Agenzia Italiana del Farmaco Web Registry): Figures after 1.5 Years. *European Neurology*. 2016;75 Suppl 1:9-12.
63. Patti F, Messina S, Solaro C, Amato MP, Bergamaschi R, Bonavita S, et al. Efficacy and safety of cannabinoid oromucosal spray for multiple sclerosis spasticity. *Journal of Neurology, Neurosurgery & Psychiatry*. 2016;87(9):944-51.
64. Pavisian B, MacIntosh BJ, Szilagyi G, Staines RW, O'Connor P, Feinstein A. Effects of cannabis on cognition in patients with MS: a psychometric and MRI study. *Neurology*. 2014;82(21):1879-87.
65. Punzo F, Tortora C, Di Pinto D, Pota E, Argenziano M, Di Paola A, et al. Bortezomib and endocannabinoid/endovanilloid system: a synergism in osteosarcoma. *Pharmacological Research*. 2018;137:25-33.
66. Purcell C, Davis A, Moolman N, Taylor SM. Reduction of Benzodiazepine Use in Patients Prescribed Medical Cannabis. *Cannabis and Cannabinoid Research*. 2019;4(3):214-8.
67. Radke PM, Mokhtarzadeh A, Lee MS, Harrison AR. Medical Cannabis, a Beneficial High in Treatment of Blepharospasm? An Early Observation. *Neuro-Ophthalmology*. 2017;41(5):253-8.
68. Romero K, Pavisian B, Staines WR, Feinstein A. Multiple sclerosis, cannabis, and cognition: A structural MRI study. *NeuroImage Clinical*. 2015;8:140-7.
69. Russo M, Calabro RS, Naro A, Sessa E, Rifichi C, D'Aleo G, et al. Sativex in the Management of Multiple Sclerosis-Related Spasticity: Role of the Corticospinal Modulation. *Neural Plasticity*. 2015;2015 (no pagination)(656582).

70. Sarnelli G, D'Alessandro A, Iuvone T, Capoccia E, Gigli S, Pesce M, et al. Palmitoylethanolamide Modulates Inflammation-Associated Vascular Endothelial Growth Factor (VEGF) Signaling via the Akt/mTOR Pathway in a Selective Peroxisome Proliferator-Activated Receptor Alpha (PPAR-alpha)-Dependent Manner. *PLoS ONE [Electronic Resource]*. 2016;11(5):e0156198.
71. Savage TE, Sourbron J, Bruno PL, Skirvin LA, Wolper ES, Anagnos CJ, et al. Efficacy of cannabidiol in subjects with refractory epilepsy relative to concomitant use of clobazam. *Epilepsy Research*. 2020;160 (no pagination)(106263).
72. Schabas AJ, Vukojevic V, Taylor C, Thu Z, Badyal A, Chan JK, et al. Cannabis-based product use in a multiple sclerosis cohort. *Multiple Sclerosis Journal Experimental Translational & Clinical*. 2019;5(3):2055217319869360.
73. Stillman M, Capron M, Mallow M, Ransom T, Gustafson K, Bell A, et al. Utilization of medicinal cannabis for pain by individuals with spinal cord injury. *Spinal Cord Series and Cases*. 2019;5:66.
74. Swift W, Gates P, Dillon P. Survey of Australians using cannabis for medical purposes. *Harm Reduction Journal*. 2005;2:18.
75. Sylvestre DL, Clements BJ, Malibu Y. Cannabis use improves retention and virological outcomes in patients treated for hepatitis C. *European Journal of Gastroenterology & Hepatology*. 2006;18(10):1057-63.
76. Tyree GA, Sarkar R, Bellows BK, Ellis RJ, Atkinson JH, Marcotte TD, et al. A Cost-Effectiveness Model for Adjunctive Smoked Cannabis in the Treatment of Chronic Neuropathic Pain. *Cannabis and Cannabinoid Research*. 2019;4(1):62-72.
77. Vermersch P, Trojano M. Tetrahydrocannabinol:Cannabidiol Oromucosal Spray for Multiple Sclerosis-Related Resistant Spasticity in Daily Practice. *European Neurology*. 2016;76(5-6):216-26.
78. Vidot DC, Lerner B, Gonzalez R. Cannabis Use, Medication Management and Adherence Among Persons Living with HIV. *AIDS & Behavior*. 2017;21(7):2005-13.
79. Voon P, Hayashi K, Milloy MJ, Nguyen P, Wood E, Montaner J, et al. Pain Among High-Risk Patients on Methadone Maintenance Treatment. *Journal of Pain*. 2015;16(9):887-94.
80. Wade DT, Makela PM, House H, Bateman C, Robson P. Long-term use of a cannabis-based medicine in the treatment of spasticity and other symptoms in multiple sclerosis. *Multiple Sclerosis*. 2006;12(5):639-45.
81. Waissengrin B, Urban D, Leshem Y, Garty M, Wolf I. Patterns of use of medical cannabis among Israeli cancer patients: a single institution experience. *Journal of Pain & Symptom Management*. 2015;49(2):223-30.
82. Walsh Z, Callaway R, Belle-Isle L, Capler R, Kay R, Lucas P, et al. Cannabis for therapeutic purposes: patient characteristics, access, and reasons for use. *International Journal of Drug Policy*. 2013;24(6):511-6.
83. Ware MA, Rueda S, Singer J, Kilby D. Cannabis use by persons living with HIV/AIDS: Patterns and prevalence of use. *Journal of Cannabis Therapeutics*. 2003;3(2):3-15.

84. Witt CM, Berling NEJ, Rinpoche NT, Cuomo M, Willich SN. Evaluation of medicinal plants as part of Tibetan medicine prospective observational study in Sikkim and Nepal. *Journal of Alternative and Complementary Medicine*. 2009;15(1):59-65.
85. Woolridge E, Barton S, Samuel J, Osorio J, Dougherty A, Holdcroft A. Cannabis use in HIV for pain and other medical symptoms. *Journal of Pain & Symptom Management*. 2005;29(4):358-67.
86. Zhang H, Xie M, Levin M, Archibald SD, Jackson BS, Young JEM, et al. Survival outcomes of marijuana users in p16 positive oropharynx cancer patients. *Journal of Otolaryngology: Head and Neck Surgery*. 2019;48(1):43.

#### **Study did not report on medical cannabis**

1. Brenton JN, Schreiner T, Karoscik K, Richter M, Ferrante S, Waldman A, et al. Attitudes, perceptions, and use of marijuana in youth with multiple sclerosis. *Journal of Neurology*. 2018;265(2):417-23.
2. Chirchiglia D, Paventi S, Seminara P, Cione E, Gallelli L. N-Palmitoyl Ethanol Amide Pharmacological Treatment in Patients With Nonsurgical Lumbar Radiculopathy. *Journal of Clinical Pharmacology*. 2018;58(6):733-9.
3. Coates MD, Soriano C, Dalessio S, Stuart A, Walter V, Koltun W, et al. Gastrointestinal hypoalgesia in inflammatory bowel disease. *Annals of Gastroenterology*. 2020;33(1):45-52.
4. Cooke AC, Knight KR, Miaskowski C. Patients' and clinicians' perspectives of co-use of cannabis and opioids for chronic non-cancer pain management in primary care. *International Journal of Drug Policy*. 2019;63:23-8.
5. Costiniuk CT, Saneei Z, Salahuddin S, Cox J, Routy JP, Rueda S, et al. Cannabis Consumption in People Living with HIV: Reasons for Use, Secondary Effects, and Opportunities for Health Education. *Cannabis and Cannabinoid Research*. 2019;4(3):204-13.
6. Cuomo A, Russo G, Esposito G, Forte CA, Connola M, Marcassa C. Efficacy and gastrointestinal tolerability of oral oxycodone/naloxone combination for chronic pain in outpatients with cancer: An observational study. *American Journal of Hospice & Palliative Medicine*. 2014;31(8):867-76.
7. Finnerup NB, Norrbrink C, Trok K, Piehl F, Johannesen IL, Sorensen JC, et al. Phenotypes and predictors of pain following traumatic spinal cord injury: A prospective study. *Journal of Pain*. 2014;15(1):40-8.
8. Gallagher R, Best JA, Fyles G, Hawley P, Yeomans W. Attitudes and beliefs about the use of Cannabis for symptom control in a palliative population. *Journal of Cannabis Therapeutics*. 2003;3(2):41-50.
9. Gill A, Williams AC. Preliminary study of chronic pain patients' concerns about cannabinoids as analgesics. *Clinical Journal of Pain*. 2001;17(3):245-8.
10. Habib G, Avisar I. The Consumption of Cannabis by Fibromyalgia Patients in Israel. *Pain Research and Treatment*. 2018;2018:7829427.

11. Harder S, Groenvold M, Isaksen J, Sigaard J, Frandsen KB, Neergaard MA, et al. Antiemetic use of olanzapine in patients with advanced cancer: results from an open-label multicenter study. *Supportive Care in Cancer*. 2019;27(8):2849-56.
12. Hefner K, Sofuoglu M, Rosenheck R. Concomitant cannabis abuse/dependence in patients treated with opioids for non-cancer pain. *American Journal on Addictions*. 2015;24(6):538-45.
13. Johnson JR, Lossignol D, Burnell-Nugent M, Fallon MT. An open-label extension study to investigate the long-term safety and tolerability of THC/CBD oromucosal spray and oromucosal THC spray in patients with terminal cancer-related pain refractory to strong opioid analgesics. *Journal of Pain & Symptom Management*. 2013;46(2):207-18.
14. Lal S, Prasad N, Ryan M, Tangri S, Silverberg MS, Gordon A, et al. Cannabis use amongst patients with inflammatory bowel disease. *European Journal of Gastroenterology & Hepatology*. 2011;23(10):891-6.
15. Mai LM, Clark AJ, Gordon AS, Lynch ME, Morley-Forster PK, Nathan H, et al. Long-Term Outcomes in the Management of Painful Diabetic Neuropathy. *Canadian Journal of Neurological Sciences*. 2017;44(4):337-42.
16. Noyes R, Jr., Brunk SF, Avery DA, Canter AC. The analgesic properties of delta-9-tetrahydrocannabinol and codeine. *Clinical Pharmacology & Therapeutics*. 1975;18(1):84-9.
17. Pezzilli R, Ciuffreda P, Ottria R, Ravelli A, Melzi d'Eril G, Barassi A. Serum endocannabinoids in assessing pain in patients with chronic pancreatitis and in those with pancreatic ductal adenocarcinoma. *Scandinavian Journal of Gastroenterology*. 2017;52(10):1133-9.
18. Rogers AH, Shepherd JM, Paulus DJ, Orr MF, Ditre JW, Bakhshaie J, et al. The Interaction of Alcohol Use and Cannabis Use Problems in Relation to Opioid Misuse Among Adults with Chronic Pain. *International Journal of Behavioral Medicine*. 2019;26(5):569-75.
19. Shiplo S, Asbridge M, Leatherdale ST, Hammond D. Medical cannabis use in Canada: Vapourization and modes of delivery. *Harm Reduction Journal*. 2016;13 (1) (no pagination)(30).
20. Ste-Marie PA, Shir Y, Rampakakis E, Sampalis JS, Karellis A, Cohen M, et al. Survey of herbal cannabis (marijuana) use in rheumatology clinic attenders with a rheumatologist confirmed diagnosis. *Pain*. 2016;157(12):2792-7.
21. Stein MD, Herman DS, Bailey GL, Straus J, Anderson BJ, Uebelacker LA, et al. Chronic pain and depression among primary care patients treated with buprenorphine. *Journal of General Internal Medicine*. 2015;30(7):935-41.
22. Stillman M, Mallow M, Ransom T, Gustafson K, Bell A, Graves D. Attitudes toward and knowledge of medical cannabis among individuals with spinal cord injury. *Spinal Cord Series and Cases*. 2019;5:6.
23. Tripp DA, Nickel JC, Katz L, Krsmanovic A, Ware MA, Santor D. A survey of cannabis (marijuana) use and self-reported benefit in men with chronic prostatitis/chronic pelvic pain syndrome. *Canadian Urological Association Journal*. 2014;8(11-12):E901-5.

24. Weinkle L, Domen CH, Shelton I, Sillau S, Nair K, Alvarez E. Exploring cannabis use by patients with multiple sclerosis in a state where cannabis is legal. *Multiple Sclerosis and Related Disorders*. 2019;27:383-90.

25. Weinrieb RM, Barnett R, Lynch KG, DePiano M, Atanda A, Olthoff KM. A matched comparison study of medical and psychiatric complications and anesthesia and analgesia requirements in methadone-maintained liver transplant recipients. *Liver Transplantation*. 2004;10(1):97-106.

#### **Study did not report on harms or adverse events**

1. Aggarwal S, Carter G, Sullivan M, Zumbrunnen C, Morrill R, Mayer J. Prospectively surveying health-related quality of life and symptom relief in a lot-based sample of medical cannabis-using patients in urban Washington State reveals managed chronic illness and debility. *American Journal of Hospice & Palliative Medicine*. 2013;30(6):523-31.
2. Ashrafioun L, Bohnert KM, Jannausch M, Ilgen MA. Characteristics of substance use disorder treatment patients using medical cannabis for pain. *Addictive Behaviors*. 2015;42:185-8.
3. Bigand T, Anderson CL, Roberts ML, Shaw MR, Wilson M. Benefits and adverse effects of cannabis use among adults with persistent pain. *Nursing Outlook*. 2019;67(3):223-31.
4. Boehnke KF, Litinas E, Clauw DJ. Medical Cannabis Use Is Associated With Decreased Opiate Medication Use in a Retrospective Cross-Sectional Survey of Patients With Chronic Pain. *Journal of Pain*. 2016;17(6):739-44.
5. Boehnke KF, Scott JR, Litinas E, Sisley S, Williams DA, Clauw DJ. Pills to Pot: Observational Analyses of Cannabis Substitution Among Medical Cannabis Users With Chronic Pain. *Journal of Pain*. 2019;20(7):830-41.
6. Capano A, Weaver R, Burkman E. Evaluation of the effects of CBD hemp extract on opioid use and quality of life indicators in chronic pain patients: a prospective cohort study. *Postgraduate Medicine*. 2020;132(1):56-61.
7. Consroe P, Musty R, Rein J, Tillery W, Pertwee R. The perceived effects of smoked cannabis on patients with multiple sclerosis. *European Neurology*. 1997;38(1):44-8.
8. Cranford JA, Bohnert KM, Perron BE, Bourque C, Ilgen M. Prevalence and correlates of "Vaping" as a route of cannabis administration in medical cannabis patients. *Drug and Alcohol Dependence*. 2016;169:41-7.
9. Curtis SA, Spodick J, Lew D, Roberts JD. Medical marijuana certification for patients with sickle cell disease: A survey study of patient's use and preferences. *Blood Conference: 60th Annual Meeting of the American Society of Hematology, ASH*. 2018;132(Suppl. 1).
10. Davis AK, Walton MA, Bohnert KM, Bourque C, Ilgen MA. Factors associated with alcohol consumption among medical cannabis patients with chronic pain. *Addictive Behaviors*. 2018;77:166-71.
11. Donovan KA, Oberoi-Jassal R, Chang YD, Rajasekhara S, Haas MF, Randich AL, et al. Cannabis Use in Young Adult Cancer Patients. *Journal of Adolescent & Young Adult Oncology*. 2020;9(1):30-5.



12. Drossel C, Forchheimer M, Meade MA. Characteristics of Individuals with Spinal Cord Injury Who Use Cannabis for Therapeutic Purposes. *Topics in Spinal Cord Injury Rehabilitation*. 2016;22(1):3-12.
13. Ehde DM, Alschuler KN, Osborne TL, Hanley MA, Jensen MP, Kraft GH. Utilization and patients' perceptions of the effectiveness of pain treatments in multiple sclerosis: A cross-sectional survey. *Disability & Health Journal*. 2015;8(3):452-6.
14. Gras A, Broughton J. A cost-effectiveness model for the use of a cannabis-derived oromucosal spray for the treatment of spasticity in multiple sclerosis. *Expert Review of Pharmacoeconomics and Outcomes Research*. 2016;16(6):771-9.
15. Jehangir A, Parkman HP. Cannabinoid Use in Patients With Gastroparesis and Related Disorders: Prevalence and Benefit. *American Journal of Gastroenterology*. 2019;114(6):945-53.
16. Kindred JH, Li K, Ketelhut NB, Proessl F, Fling BW, Honce JM, et al. Cannabis use in people with Parkinson's disease and Multiple Sclerosis: A web-based investigation. *Complementary Therapies in Medicine*. 2017;33:99-104.
17. Lake S, Walsh Z, Kerr T, Cooper ZD, Buxton J, Wood E, et al. Frequency of cannabis and illicit opioid use among people who use drugs and report chronic pain: A longitudinal analysis. *PLoS Medicine / Public Library of Science*. 2019;16(11):e1002967.
18. Li X, Vigil JM, Stith SS, Brockelman F, Keeling K, Hall B. The effectiveness of self-directed medical cannabis treatment for pain. *Complementary Therapies in Medicine*. 2019;46:123-30.
19. Lucas P, Baron EP, Jikomes N. Medical cannabis patterns of use and substitution for opioids & other pharmaceutical drugs, alcohol, tobacco, and illicit substances; Results from a cross-sectional survey of authorized patients. *Harm Reduction Journal Vol 16 2019, ArtID 9*. 2019;16.
20. Mallada Frechin J. Effect of tetrahydrocannabinol:cannabidiol oromucosal spray on activities of daily living in multiple sclerosis patients with resistant spasticity: a retrospective, observational study. *Neurodegenerative Disease Management*. 2018;8(3):151-9.
21. Marinelli L, Mori L, Canneva S, Colombano F, Curra A, Fattapposta F, et al. The effect of cannabinoids on the stretch reflex in multiple sclerosis spasticity. *International Clinical Psychopharmacology*. 2016;31(4):232-9.
22. Mbachi C, Attar B, Oyenubi O, Yuchen W, Efesomwan A, Paintsil I, et al. Association between cannabis use and complications related to ulcerative colitis in hospitalized patients: A propensity matched retrospective cohort study. *Medicine*. 2019;98(32):e16551.
23. Mbachi C, Attar B, Wang Y, Paintsil I, Mba B, Fugar S, et al. Association Between Cannabis Use and Complications Related to Crohn's Disease: A Retrospective Cohort Study. *Digestive Diseases & Sciences*. 2019;64(10):2939-44.
24. Mercurio A, Aston ER, Claborn KR, Waye K, Rosen RK. Marijuana as a substitute for prescription medications: A qualitative study. *Substance Use & Misuse*. 2019;54(11):1894-902.

25. Merker AM, Riaz M, Friedman S, Allegretti JR, Korzenik J. Legalization of Medicinal Marijuana Has Minimal Impact on Use Patterns in Patients With Inflammatory Bowel Disease. *Inflammatory Bowel Diseases*. 2018;24(11):2309-14.
26. Messina S, Solaro C, Righini I, Bergamaschi R, Bonavita S, Bossio RB, et al. Sativex in resistant multiple sclerosis spasticity: Discontinuation study in a large population of Italian patients (SA.FE. study). *PLoS ONE [Electronic Resource]*. 2017;12(8):e0180651.
27. Meyer T, Funke A, Munch C, Kettemann D, Maier A, Walter B, et al. Real world experience of patients with amyotrophic lateral sclerosis (ALS) in the treatment of spasticity using tetrahydrocannabinol:cannabidiol (THC:CBD). *BMC Neurology*. 2019;19(1):222.
28. Michalski CW, Oti FE, Erkan M, Sauliunaite D, Bergmann F, Pacher P, et al. Cannabinoids in pancreatic cancer: Correlation with survival and pain. *International Journal of Cancer*. 2008;122(4):742-50.
29. Naftali T, Lev LB, Yablecovitch D, Half E, Konikoff FM. Treatment of Crohn's disease with cannabis: an observational study. *Israel Medical Association Journal: Imaj*. 2011;13(8):455-8.
30. Page SA, Verhoef MJ, Stebbins RA, Metz LM, Levy JC. Cannabis use as described by people with multiple sclerosis. *Canadian Journal of Neurological Sciences*. 2003;30(3):201-5.
31. Perron BE, Bohnert K, Perone AK, Bonn-Miller MO, Ilgen M. Use of prescription pain medications among medical cannabis patients: comparisons of pain levels, functioning, and patterns of alcohol and other drug use. *Journal of Studies on Alcohol & Drugs*. 2015;76(3):406-13.
32. Piper BJ, Dekeuster RM, Beals ML, Cobb CM, Burchman CA, Perkinson L, et al. Substitution of medical cannabis for pharmaceutical agents for pain, anxiety, and sleep. *Journal of Psychopharmacology*. 2017;31(5):569-75.
33. Reiman A, Welty M, Solomon P. Cannabis as a Substitute for Opioid-Based Pain Medication: Patient Self-Report. *Cannabis and Cannabinoid Research*. 2017;2(1):160-6.
34. Rochford C, Edgeworth D, Hashim M, Harmon D. Attitudes of Irish patients with chronic pain towards medicinal cannabis. *Irish Journal of Medical Science*. 2019;188(1):267-72.
35. Russo M, De Luca R, Torrisi M, Rifici C, Sessa E, Bramanti P, et al. Should we care about sativex-induced neurobehavioral effects? A 6-month follow-up study. *European Review for Medical & Pharmacological Sciences*. 2016;20(14):3127-33.
36. Saadeh CE, Rustem DR. Medical Marijuana Use in a Community Cancer Center. *Journal of oncology practice/American Society of Clinical Oncology*. 2018;14(9):e566-e78.
37. Spencer N, Shaw E, Slaven M. Medical cannabis use in an outpatient palliative care clinic: A retrospective chart review. *Journal of Pain Management*. 2016;9(4):507-13.
38. Ste-Marie PA, Fitzcharles MA, Gamsa A, Ware MA, Shir Y. Association of herbal cannabis use with negative psychosocial parameters in patients with fibromyalgia. *Arthritis care & research*. 2012;64(8):1202-8.

39. Sznitman SR, Goldberg V, Sheinman-Yuffe H, Flechter E, Bar-Sela G. Storage and disposal of medical cannabis among patients with cancer: Assessing the risk of diversion and unintentional digestion. *Cancer*. 2016;122(21):3363-70.
40. Victorson D, McMahon M, Horowitz B, Glickson S, Parker B, Mendoza-Temple L. Exploring cancer survivors' attitudes, perceptions, and concerns about using medical cannabis for symptom and side effect management: A qualitative focus group study. *Complementary Therapies in Medicine*. 2019;47:102204.
41. Ware MA, Adams H, Guy GW. The medicinal use of cannabis in the UK: results of a nationwide survey. *International Journal of Clinical Practice*. 2005;59(3):291-5.
42. Ware MA, Martel MO, Jovey R, Lynch ME, Singer J. A prospective observational study of problematic oral cannabinoid use. *Psychopharmacology*. 2018;235(2):409-17.

**Study included <25 patients**

1. Apel A, Greim B, Zettl UK. How frequently do patients with multiple sclerosis use complementary and alternative medicine? *Complementary Therapies in Medicine*. 2005;13(4):258-63.
2. Mondello E, Quattrone D, Cardia L, Bova G, Mallamace R, Barbagallo AA, et al. Cannabinoids and spinal cord stimulation for the treatment of failed back surgery syndrome refractory pain. *Journal of Pain Research*. 2018;11:1761-7.
3. Toth C, Au S. A prospective identification of neuropathic pain in specific chronic polyneuropathy syndromes and response to pharmacological therapy. *Pain*. 2008;138(3):657-66.

## Appendix 5: Risk of bias ratings

| Study                    | Confounding | Selection of participants into the study | Classification of the intervention | Departures from the intended intervention | Missing data | Measurement of outcomes | Selection of the reported Results |
|--------------------------|-------------|------------------------------------------|------------------------------------|-------------------------------------------|--------------|-------------------------|-----------------------------------|
| Ware, 2003               | ●           | ●                                        | ●                                  | ●                                         | ●            | ●                       | ●                                 |
| Lynch, 2006              | ●           | ●                                        | ●                                  | ●                                         | ●            | ●                       | ●                                 |
| Rog, 2007                | ●           | ●                                        | ●                                  | ●                                         | ●            | ●                       | ●                                 |
| Weber, 2009              | ●           | ●                                        | ●                                  | ●                                         | ●            | ●                       | ●                                 |
| Bestard, 2011*           | ●           | ●                                        | ●                                  | ●                                         | ●            | ●                       | ●                                 |
| Fiz, 2011                | ●           | ●                                        | ●                                  | ●                                         | ●            | ●                       | ●                                 |
| Dominguez, 2012          | ●           | ●                                        | ●                                  | ●                                         | ●            | ●                       | ●                                 |
| Gatti, 2012              | ●           | ●                                        | ●                                  | ●                                         | ●            | ●                       | ●                                 |
| Toth, 2012               | ●           | ●                                        | ●                                  | ●                                         | ●            | ●                       | ●                                 |
| Schifilliti, 2014        | ●           | ●                                        | ●                                  | ●                                         | ●            | ●                       | ●                                 |
| Storr, 2014              | ●           | ●                                        | ●                                  | ●                                         | ●            | ●                       | ●                                 |
| Del Giorno, 2015         | ●           | ●                                        | ●                                  | ●                                         | ●            | ●                       | ●                                 |
| Hoggart, 2015            | ●           | ●                                        | ●                                  | ●                                         | ●            | ●                       | ●                                 |
| Ware, 2015†              | ●           | ●                                        | ●                                  | ●                                         | ●            | ●                       | ●                                 |
| Haroutounian, 2016       | ●           | ●                                        | ●                                  | ●                                         | ●            | ●                       | ●                                 |
| Bellnier, 2017           | ●           | ●                                        | ●                                  | ●                                         | ●            | ●                       | ●                                 |
| Cranford, 2017           | ●           | ●                                        | ●                                  | ●                                         | ●            | ●                       | ●                                 |
| Fanelli, 2017            | ●           | ●                                        | ●                                  | ●                                         | ●            | ●                       | ●                                 |
| Feingold, 2017           | ●           | ●                                        | ●                                  | ●                                         | ●            | ●                       | ●                                 |
| Paladini, 2017           | ●           | ●                                        | ●                                  | ●                                         | ●            | ●                       | ●                                 |
| Passavanti, 2017         | ●           | ●                                        | ●                                  | ●                                         | ●            | ●                       | ●                                 |
| Schimrigk, 2017          | ●           | ●                                        | ●                                  | ●                                         | ●            | ●                       | ●                                 |
| Chirchiglia, 2018        | ●           | ●                                        | ●                                  | ●                                         | ●            | ●                       | ●                                 |
| Crowley, 2018            | ●           | ●                                        | ●                                  | ●                                         | ●            | ●                       | ●                                 |
| Habib, 2018              | ●           | ●                                        | ●                                  | ●                                         | ●            | ●                       | ●                                 |
| Anderson, 2019           | ●           | ●                                        | ●                                  | ●                                         | ●            | ●                       | ●                                 |
| Bonar, 2019              | ●           | ●                                        | ●                                  | ●                                         | ●            | ●                       | ●                                 |
| Cervigni, 2019           | ●           | ●                                        | ●                                  | ●                                         | ●            | ●                       | ●                                 |
| Cremer-Schaeffer, 2019 ‡ | ●           | ●                                        | ●                                  | ●                                         | ●            | ●                       | ●                                 |
| Lejczak, 2019            | ●           | ●                                        | ●                                  | ●                                         | ●            | ●                       | ●                                 |
| Loi, 2019                | ●           | ●                                        | ●                                  | ●                                         | ●            | ●                       | ●                                 |
| Naftali, 2019            | ●           | ●                                        | ●                                  | ●                                         | ●            | ●                       | ●                                 |
| Perron, 2019             | ●           | ●                                        | ●                                  | ●                                         | ●            | ●                       | ●                                 |
| Sagy, 2019               | ●           | ●                                        | ●                                  | ●                                         | ●            | ●                       | ●                                 |
| Sinclair, 2019           | ●           | ●                                        | ●                                  | ●                                         | ●            | ●                       | ●                                 |
| Ueberall, 2019           | ●           | ●                                        | ●                                  | ●                                         | ●            | ●                       | ●                                 |
| Vigil, 2019              | ●           | ●                                        | ●                                  | ●                                         | ●            | ●                       | ●                                 |
| Yassin, 2019             | ●           | ●                                        | ●                                  | ●                                         | ●            | ●                       | ●                                 |
| Giorgi, 2020             | ●           | ●                                        | ●                                  | ●                                         | ●            | ●                       | ●                                 |

\* Risk of bias for confounding for comparative results were rated as serious.

† Risk of bias for confounding for unadjusted comparative comparative results were rated as serious. Adjusted comparative results were rated as moderate.

‡ The study reported on dronabinol, nabiximols, and herbal cannabis separately. The results for herbal cannabis were at serious risk of selection bias due to prior herbal cannabis use among participants.

|                       |   |
|-----------------------|---|
| Low risk of bias      | ● |
| Moderate risk of bias | ● |
| Serious risk of bias  | ● |
| Critical risk of bias | ● |

**Appendix 6: Results for all adverse events (subgroup by design)**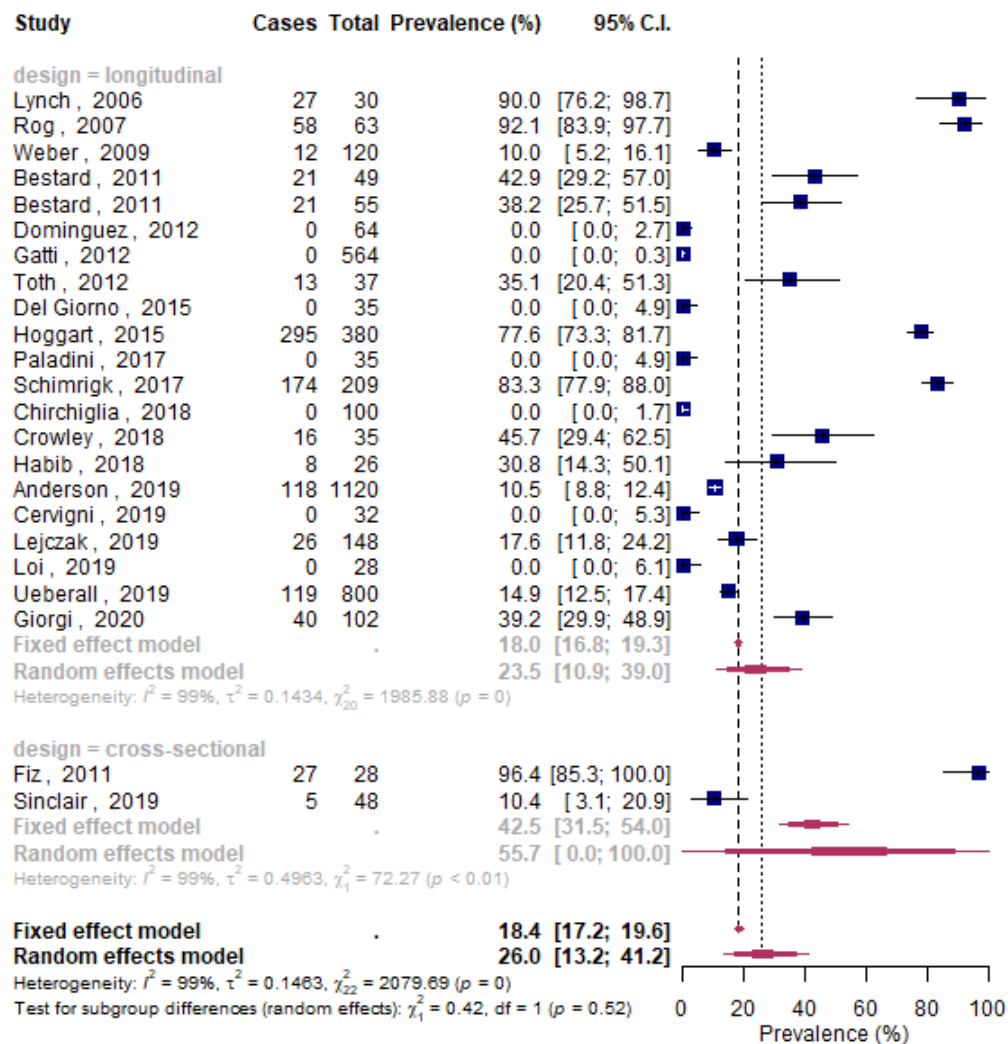

**Appendix 7: Results for all adverse events (subgroup by duration)**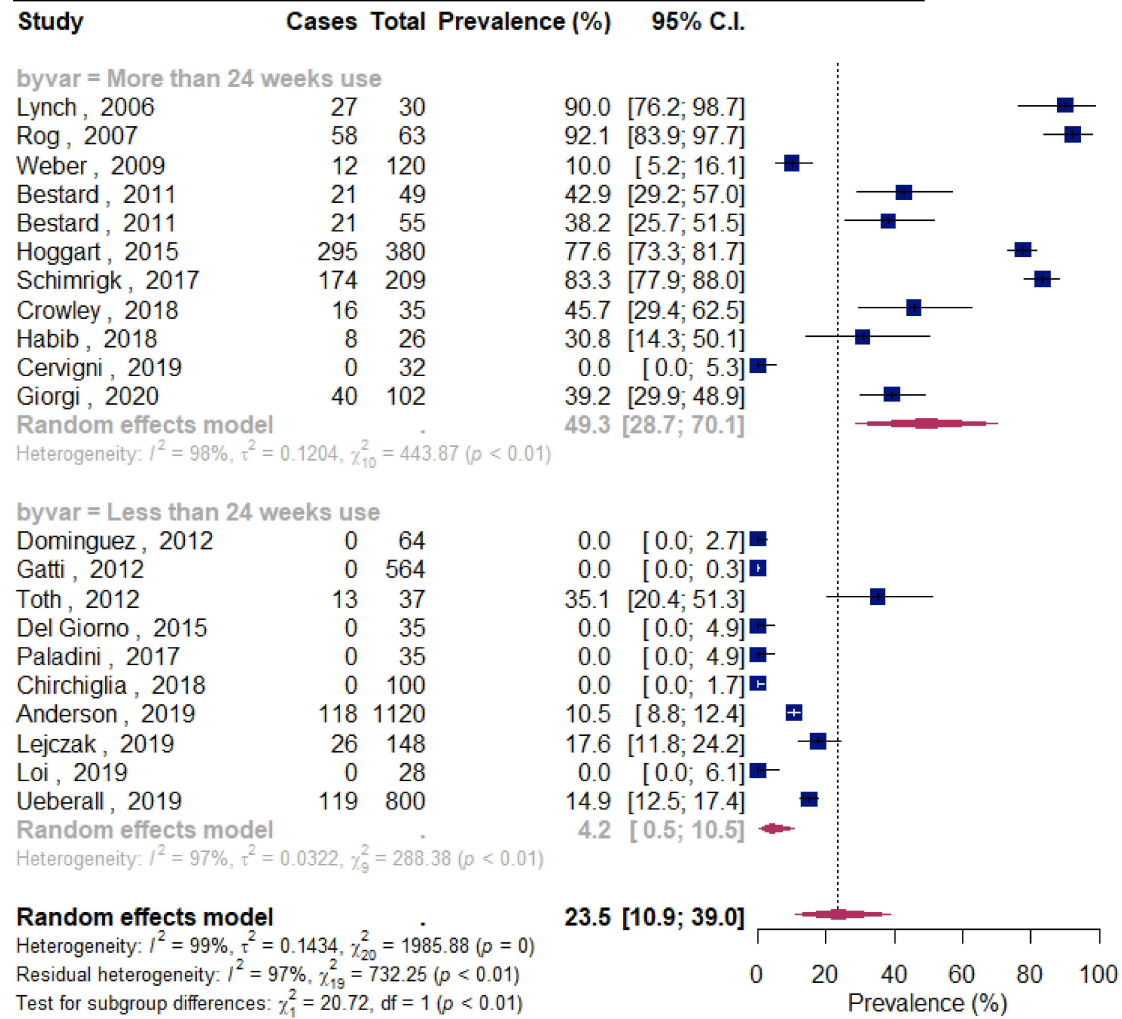

**Appendix 8: Results for all adverse events (subgroup by cannabis)**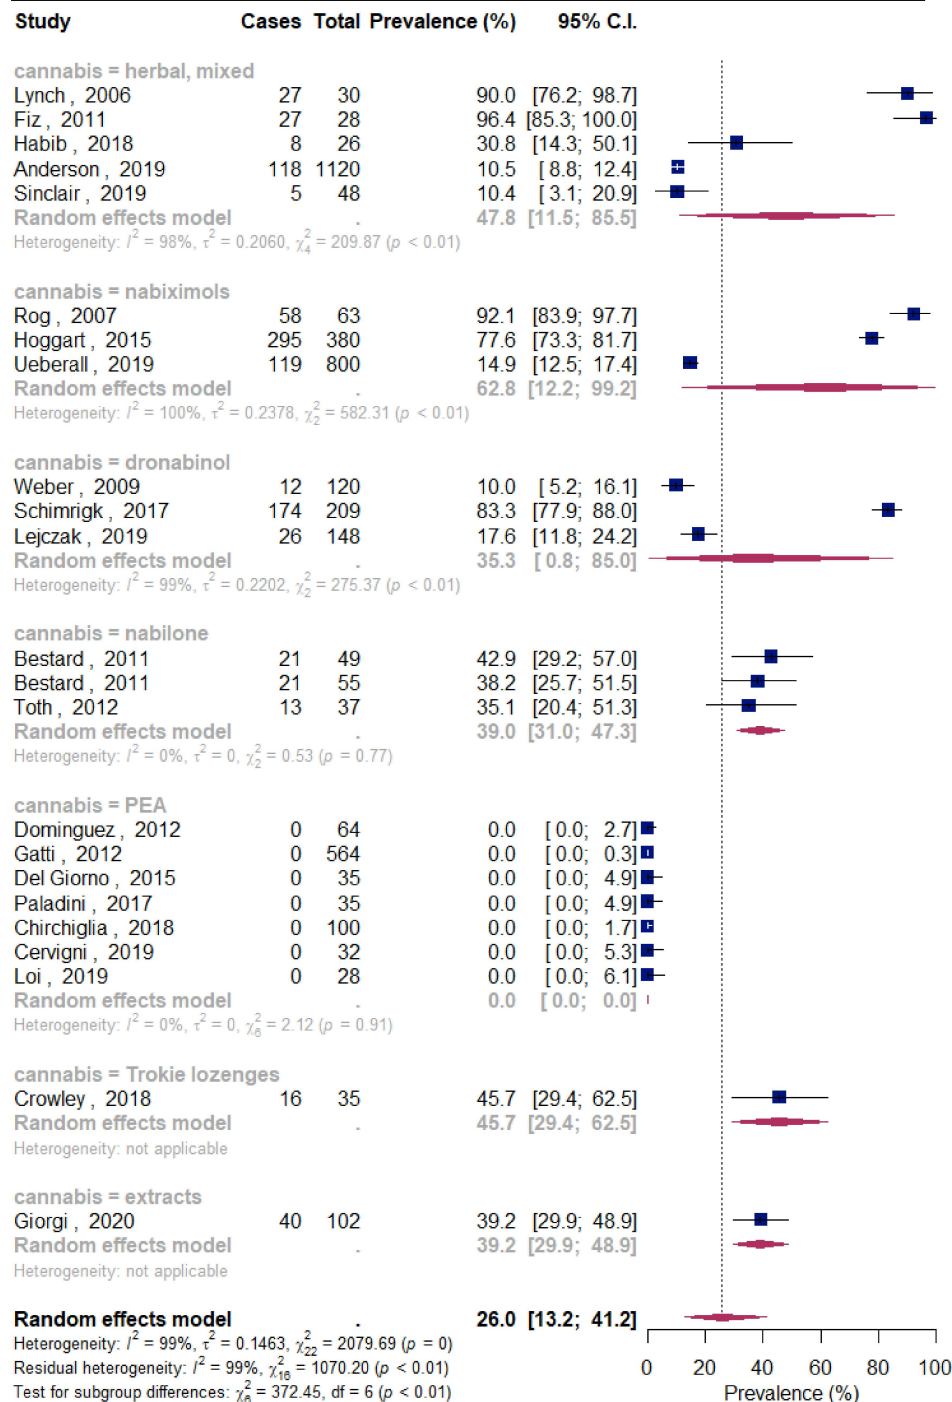

**Appendix 9: Results for all adverse events (subgroup by selection bias)**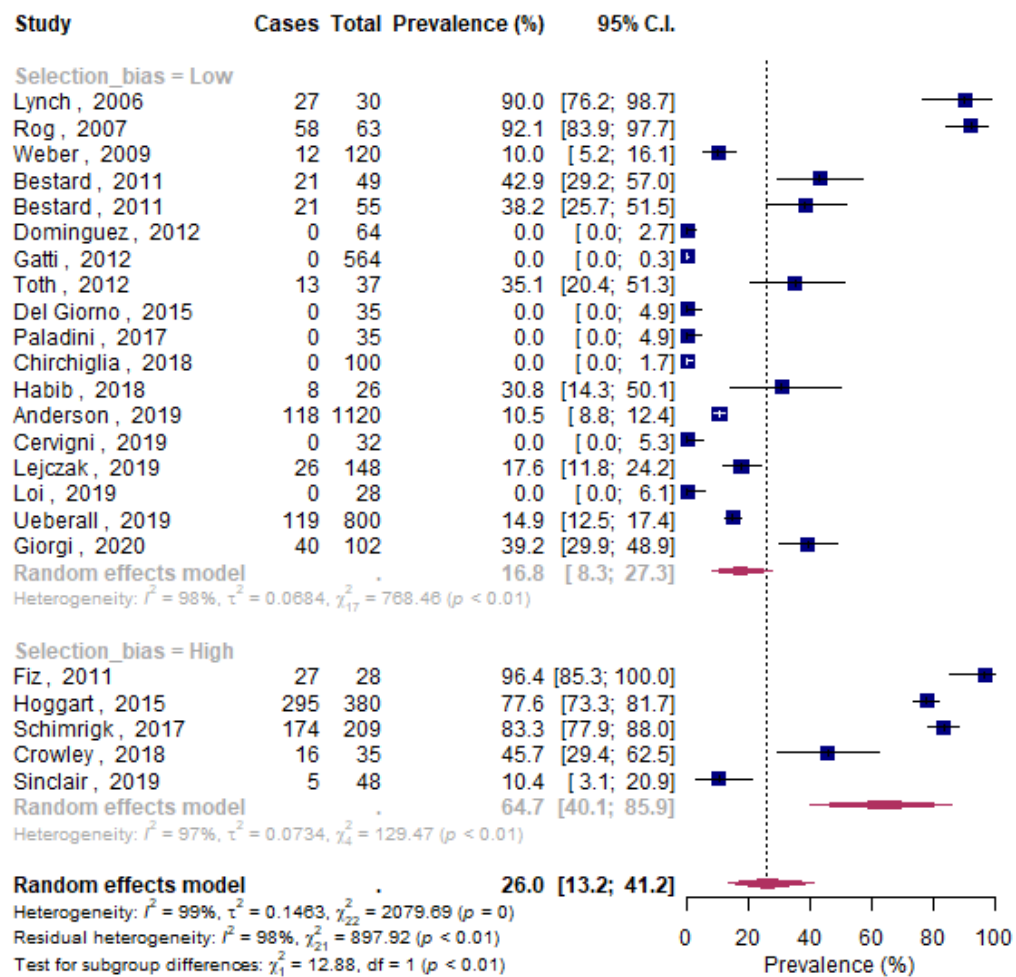



## Appendix 10: Results for adverse events leading to discontinuation (subgroup by duration)

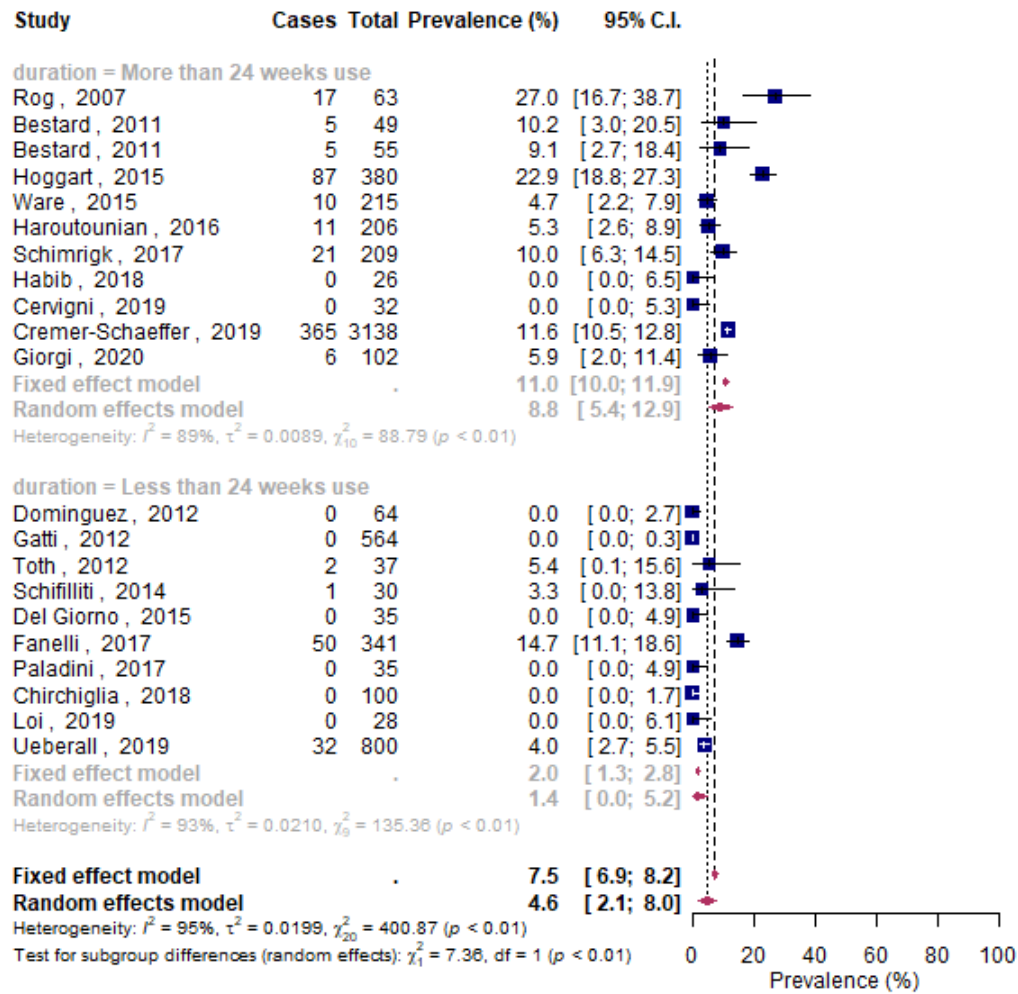

## Appendix 11: Results for adverse events leading to discontinuation (subgroup by cannabis)

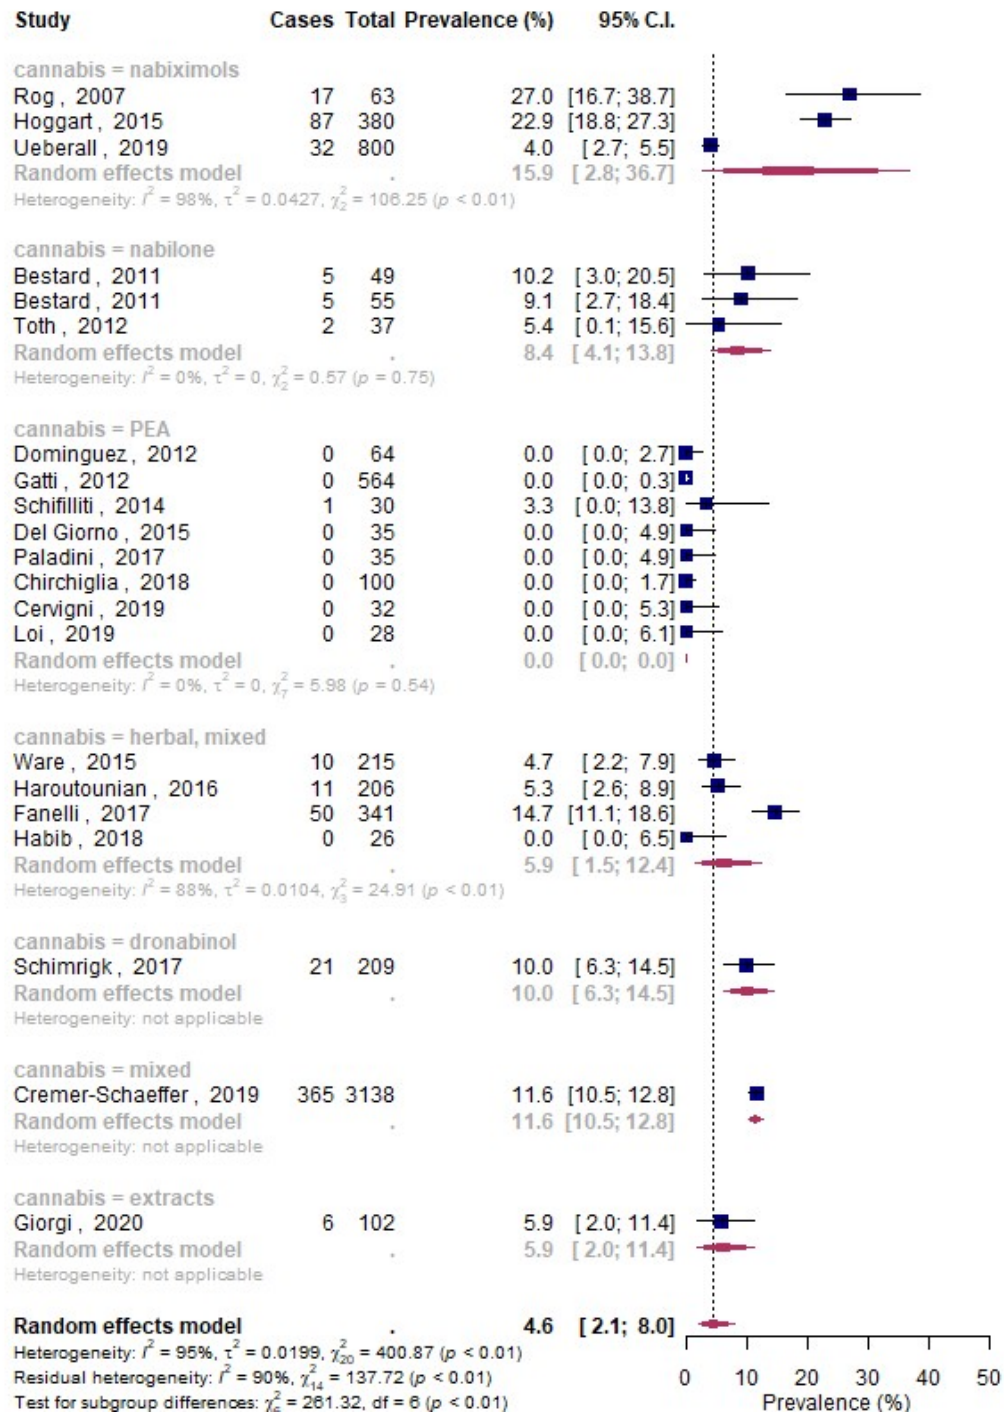

## Appendix 12: Results for adverse events leading to discontinuation (subgroup by selection bias)

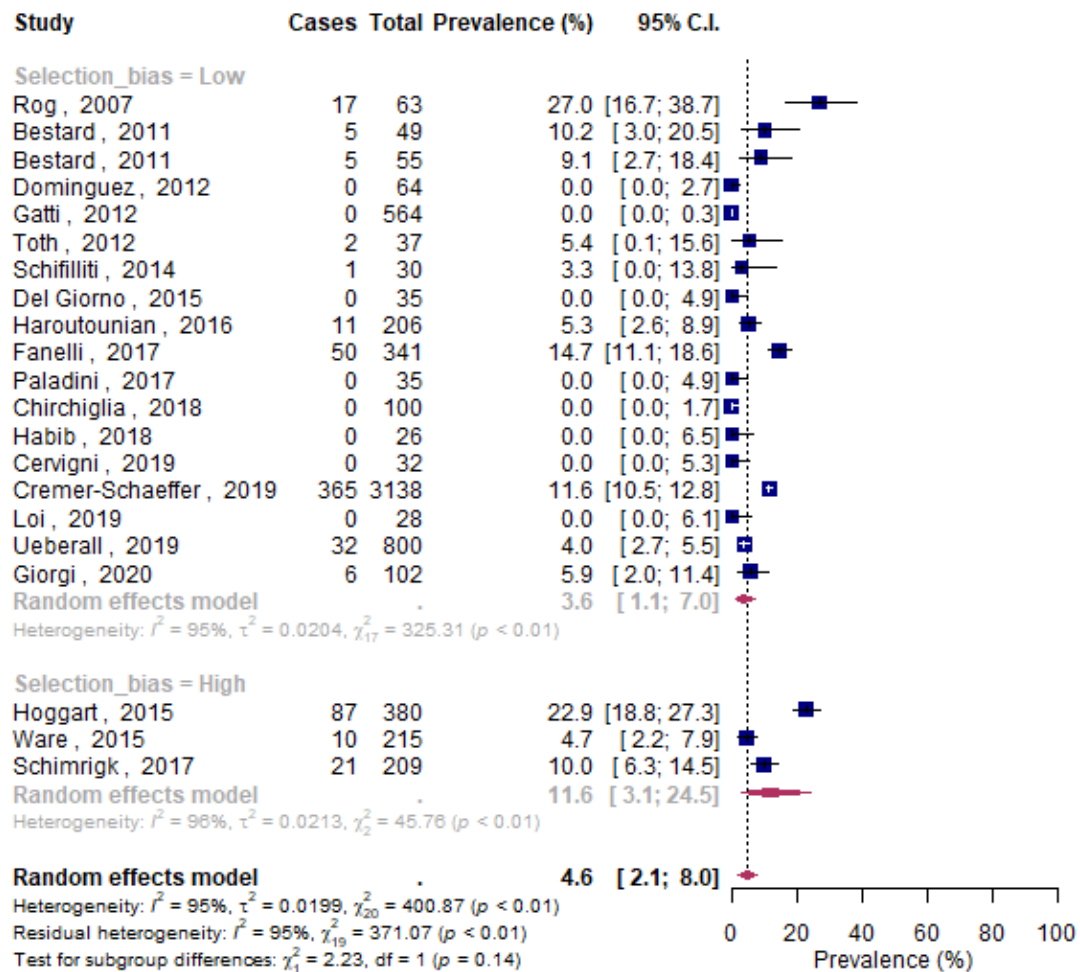

### Appendix 13: Results for serious adverse events (subgroup by design)

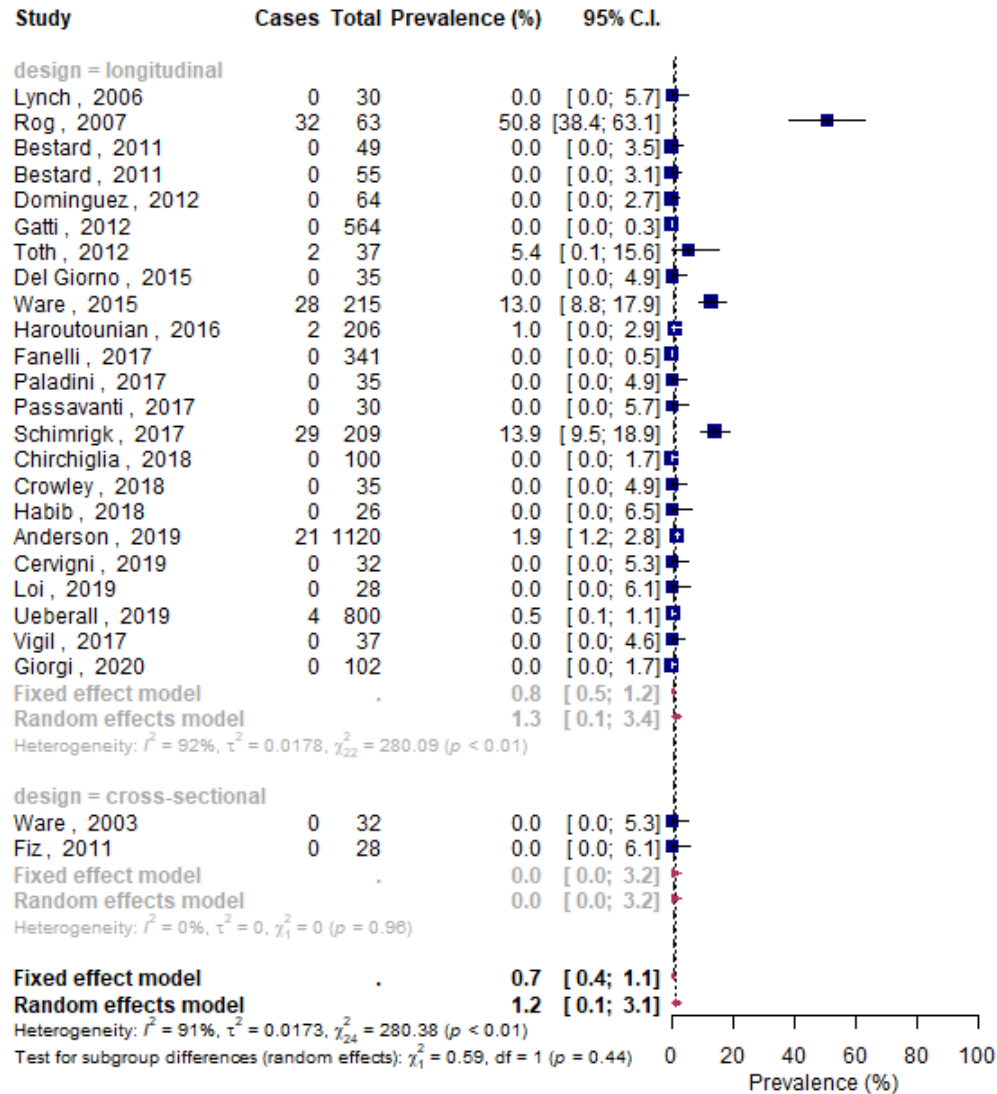

## Appendix 14: Results for serious adverse events (subgroup by duration)

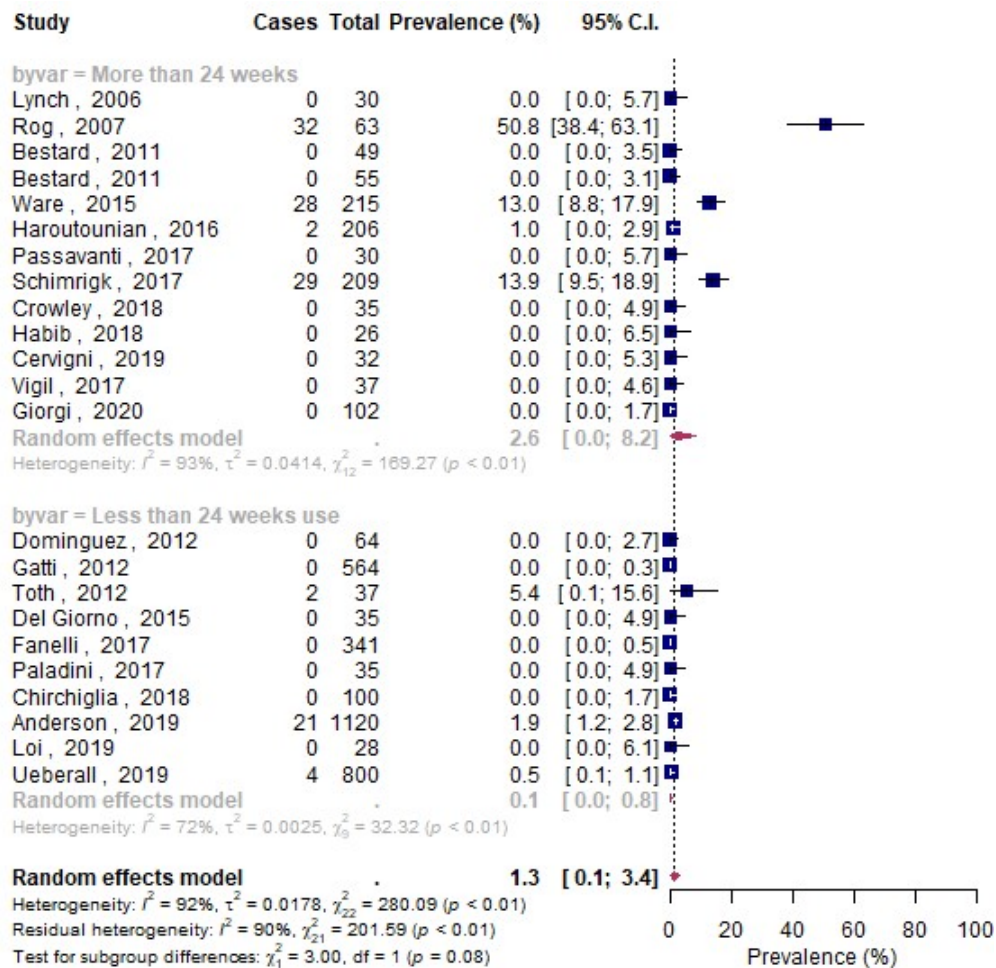

## Appendix 15: Results for serious adverse events (subgroup by selection bias)

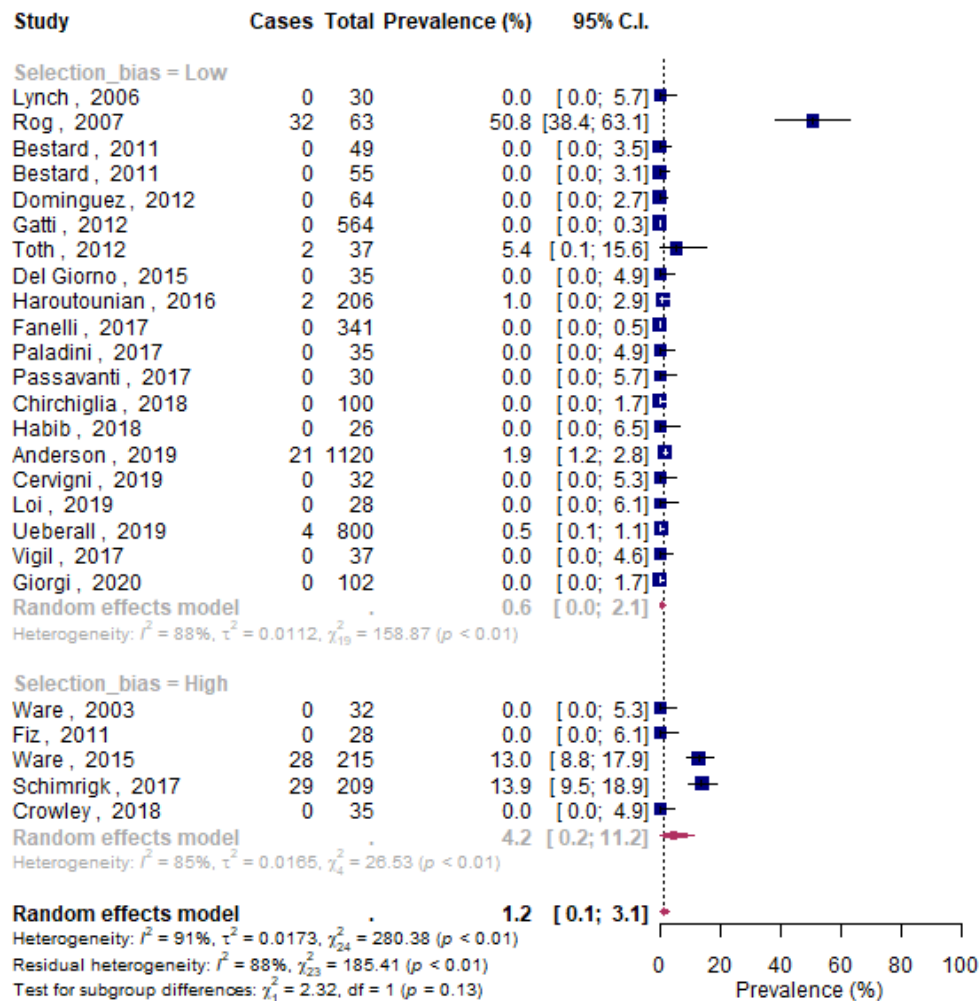

## Appendix 16: Results for psychiatric adverse events

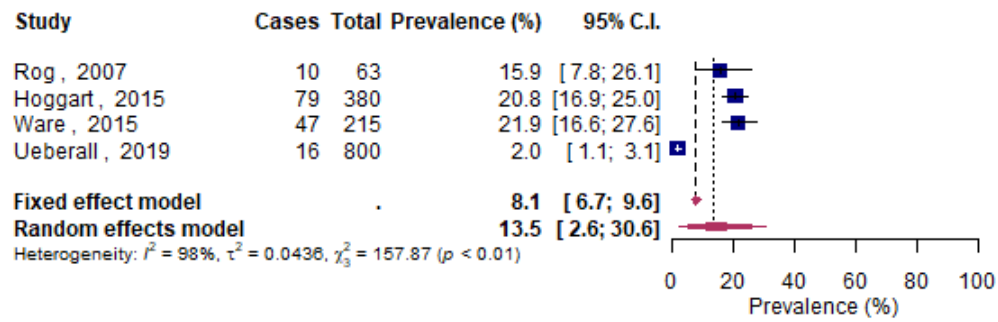

## Appendix 17: Results for suicide

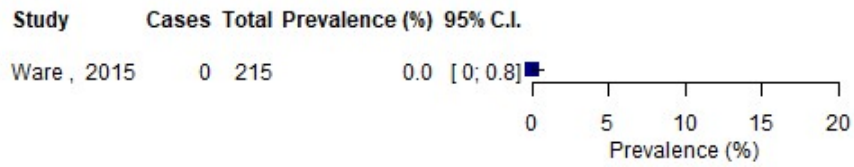



## Appendix 18: Results for suicidal thoughts

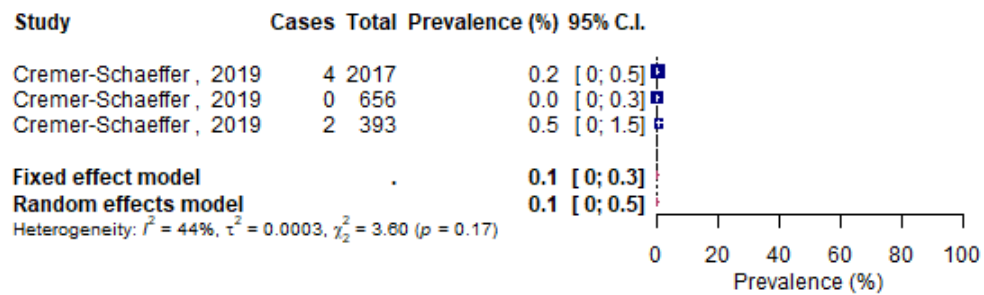

## Appendix 19: Results for depression

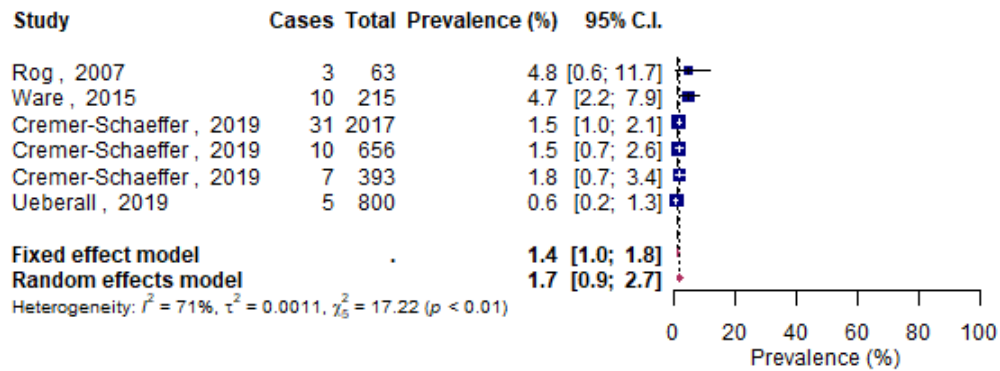

## **Appendix 20: Results for mania**

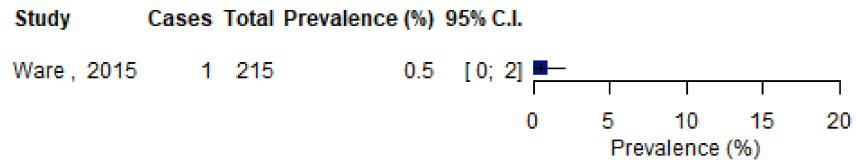

## Appendix 21: Results for hallucinations

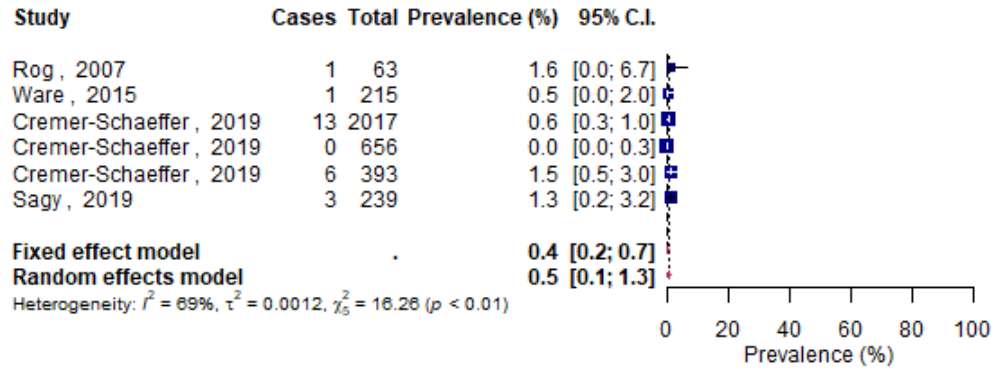

## Appendix 22: Results for delusions

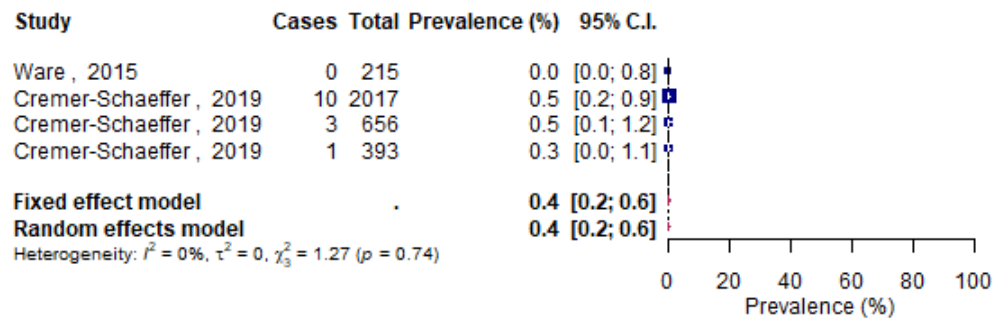

## Appendix 23: Results for paranoia

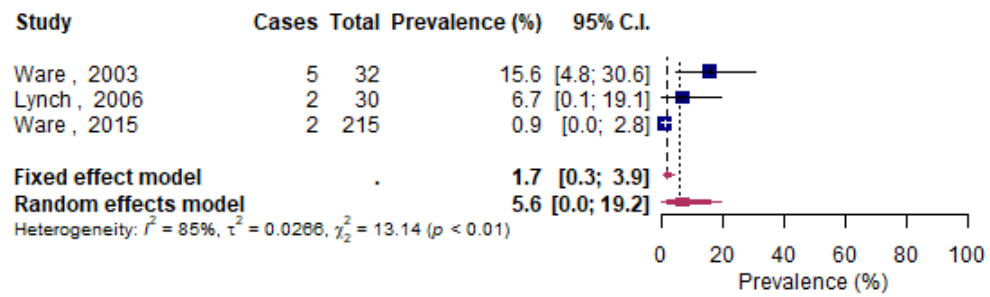

## Appendix 24: Results for anxiety

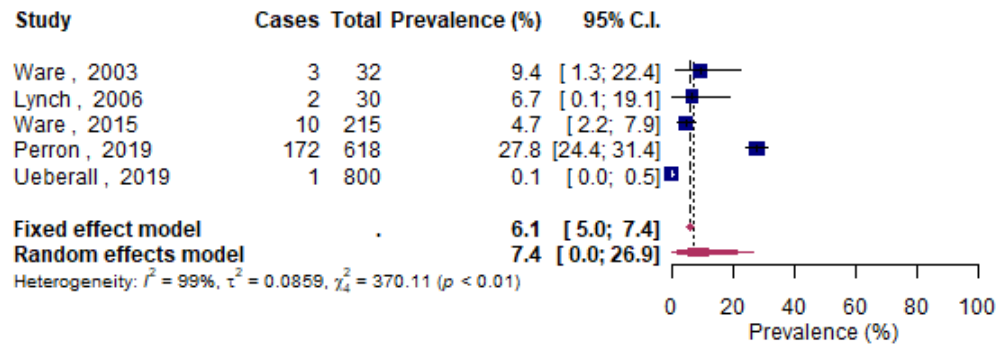

## Appendix 25: Results for euphoria

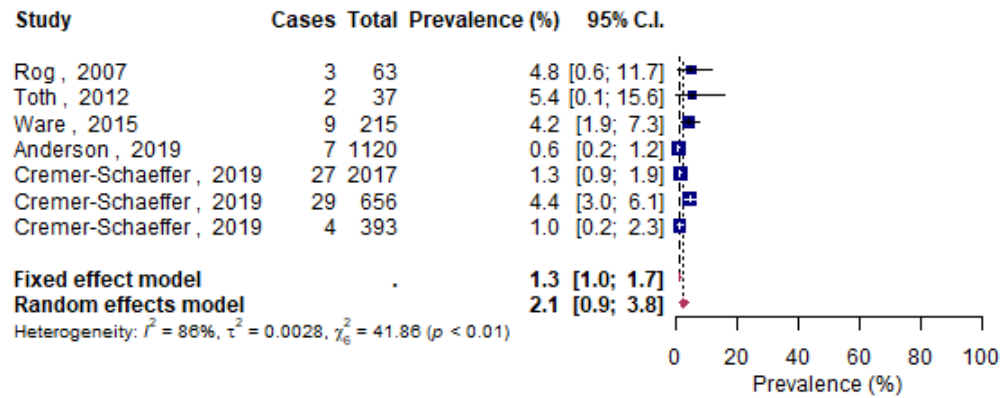



## Appendix 26: Results for memory impairment

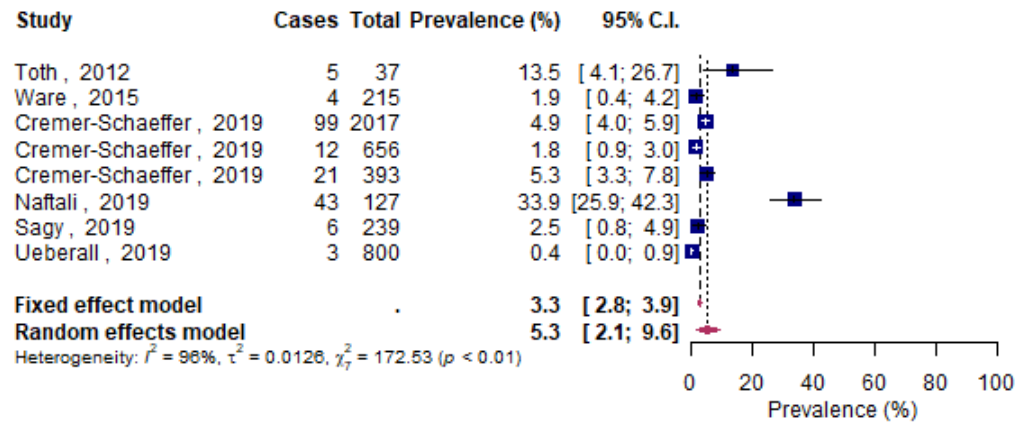

## Appendix 27: Results for confusion

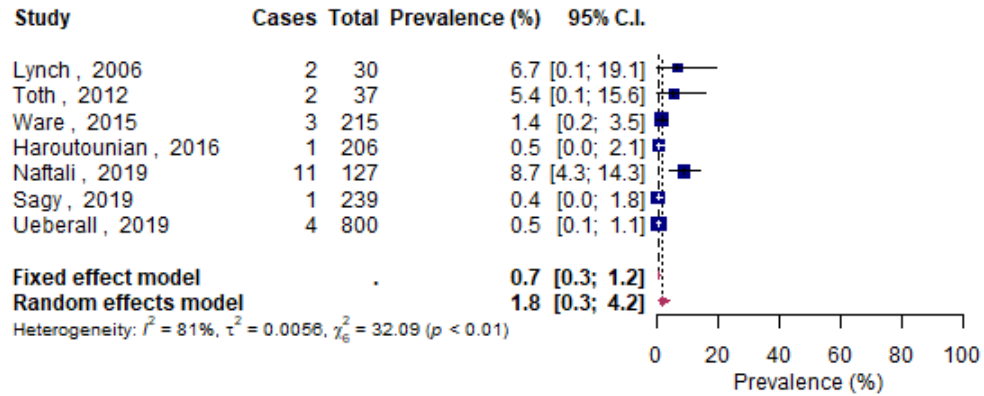

## Appendix 28: Results for disorientation

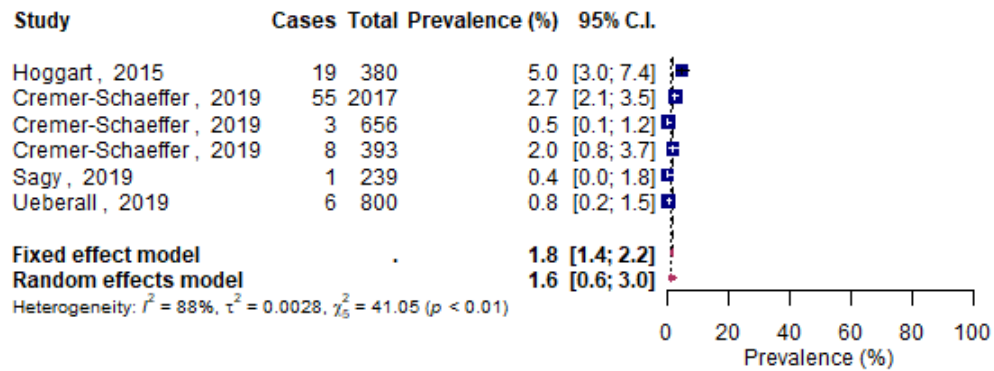

## Appendix 29: Results for impaired attention

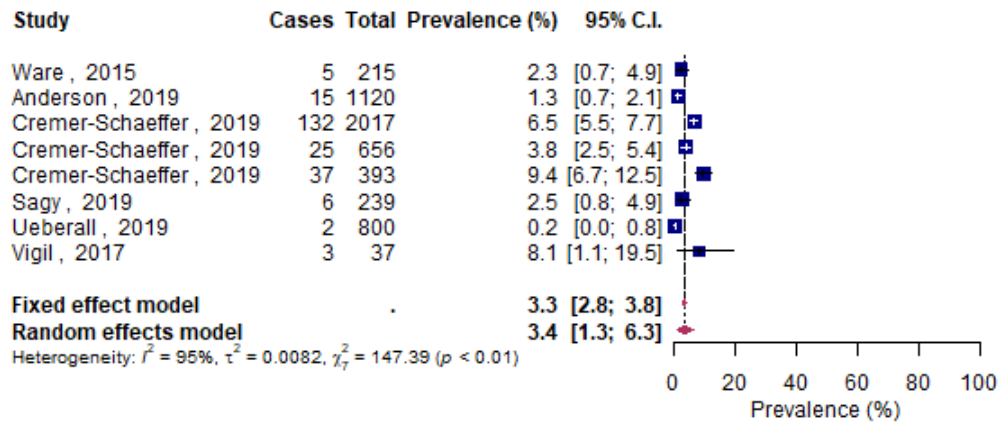

### **Appendix 30: Results for falls**

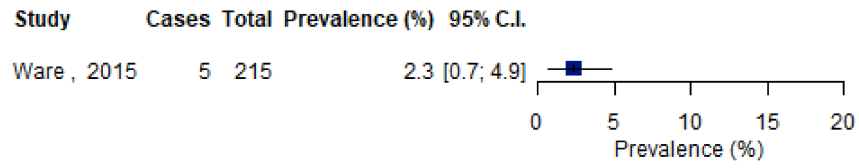

## **Appendix 31: Results for motor vehicle accidents**

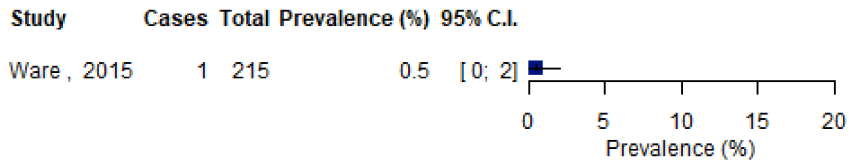

## Appendix 32: Results for dependence

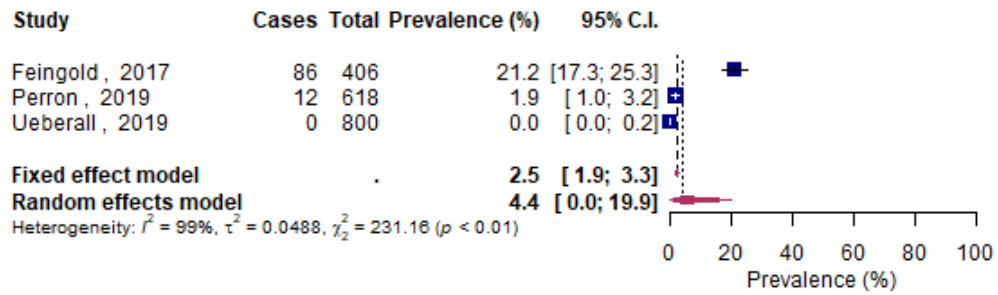

### **Appendix 33: Results for withdrawal symptoms**

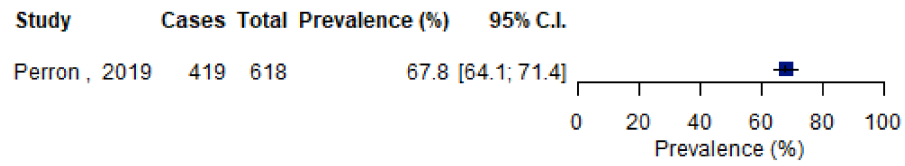



## Appendix 34: Results for withdrawal syndrome

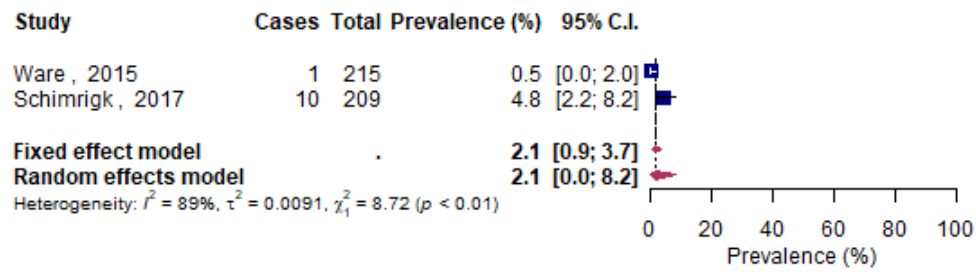

Supplement: bmjopen-2021-054282supp001_data_supplement.pdf [file bmjopen-2021-054282supp001_data_supplement.pdf]
