# Supplementary material for: Long-term and serious harms of medical cannabis and cannabinoids for chronic pain: a systematic review of non-randomised studies
Source: PubMed Central journal article supplement — BMJ Open. 2022 Aug 4;12(8):e054282. doi: 10.1136/bmjopen-2021-054282 (PMC9358949; doi:10.1136/bmjopen-2021-054282), 2022-08-04
Supplement: bmjopen-2021-054282.draft_revisions.pdf [file bmjopen-2021-054282.draft_revisions.pdf]

# BMJ Open

BMJ Open is committed to open peer review. As part of this commitment we make the peer review history of every article we publish publicly available.

When an article is published we post the peer reviewers' comments and the authors' responses online. We also post the versions of the paper that were used during peer review. These are the versions that the peer review comments apply to.

The versions of the paper that follow are the versions that were submitted during the peer review process. They are not the versions of record or the final published versions. They should not be cited or distributed as the published version of this manuscript.

BMJ Open is an open access journal and the full, final, typeset and author-corrected version of record of the manuscript is available on our site with no access controls, subscription charges or pay-per-view fees (<http://bmjopen.bmj.com>).

If you have any questions on BMJ Open's open peer review process please email [info.bmjopen@bmj.com](mailto:info.bmjopen@bmj.com)

# BMJ Open

## Long-term and serious harms of medical cannabis and cannabinoids for chronic pain: A systematic review of non-randomized studies

|                               |                                                                                                                                                                                                                                                                                                                                                                                                                                                                                                                                                                                                                                                                                                                                                                                                                                                                                                                                                                                                                                                                                                                                                                                                                                                                                 |
|-------------------------------|---------------------------------------------------------------------------------------------------------------------------------------------------------------------------------------------------------------------------------------------------------------------------------------------------------------------------------------------------------------------------------------------------------------------------------------------------------------------------------------------------------------------------------------------------------------------------------------------------------------------------------------------------------------------------------------------------------------------------------------------------------------------------------------------------------------------------------------------------------------------------------------------------------------------------------------------------------------------------------------------------------------------------------------------------------------------------------------------------------------------------------------------------------------------------------------------------------------------------------------------------------------------------------|
| Journal:                      | <i>BMJ Open</i>                                                                                                                                                                                                                                                                                                                                                                                                                                                                                                                                                                                                                                                                                                                                                                                                                                                                                                                                                                                                                                                                                                                                                                                                                                                                 |
| Manuscript ID                 | bmjopen-2021-054282                                                                                                                                                                                                                                                                                                                                                                                                                                                                                                                                                                                                                                                                                                                                                                                                                                                                                                                                                                                                                                                                                                                                                                                                                                                             |
| Article Type:                 | Original research                                                                                                                                                                                                                                                                                                                                                                                                                                                                                                                                                                                                                                                                                                                                                                                                                                                                                                                                                                                                                                                                                                                                                                                                                                                               |
| Date Submitted by the Author: | 09-Jun-2021                                                                                                                                                                                                                                                                                                                                                                                                                                                                                                                                                                                                                                                                                                                                                                                                                                                                                                                                                                                                                                                                                                                                                                                                                                                                     |
| Complete List of Authors:     | Zeraatkar, Dena; McMaster University, Health Research Methods, Evidence, and Impact; Harvard Medical School, Department of Biomedical Informatics<br>Cooper, Matthew; McMaster University, Michael G. Degroote School of Medicine<br>Agarwal, Arnav; University of Toronto, Department of Medicine<br>Vernooij, Robin; Netherlands Comprehensive Cancer Organization<br>Leung, Gareth; University of Cambridge, Department of Public Health and Primary Care<br>Loniewski, Kevin; York University, Faculty of Health<br>Dookie, Jared E ; Western University, Schulich School of Medicine and Dentistry<br>Ahmed, Muhammad Muneeb; McMaster University, Michael G. Degroote School of Medicine<br>Hong, Brian Y; University of Toronto, Division of Plastic and Reconstructive Surgery<br>Hong, Christopher; University of Toronto<br>Hong, Patrick; University of Toronto, Department of Anesthesiology and Pain Medicine<br>Couban, Rachel; McMaster University, Michael G. DeGroote Institute for Pain Research and Care<br>Agoritsas, Thomas; McMaster University, Department of Clinical Epidemiology and Biostatistics; University Hospitals of Geneva, Division of General Internal Medicine & Division of Epidemiology<br>Busse, Jason; McMaster University, Anesthesia |
| Keywords:                     | Pain management < ANAESTHETICS, PAIN MANAGEMENT, PRIMARY CARE                                                                                                                                                                                                                                                                                                                                                                                                                                                                                                                                                                                                                                                                                                                                                                                                                                                                                                                                                                                                                                                                                                                                                                                                                   |
|                               |                                                                                                                                                                                                                                                                                                                                                                                                                                                                                                                                                                                                                                                                                                                                                                                                                                                                                                                                                                                                                                                                                                                                                                                                                                                                                 |

SCHOLARONE™  
Manuscripts

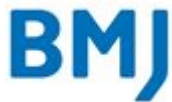

I, the Submitting Author has the right to grant and does grant on behalf of all authors of the Work (as defined in the below author licence), an exclusive licence and/or a non-exclusive licence for contributions from authors who are: i) UK Crown employees; ii) where BMJ has agreed a CC-BY licence shall apply, and/or iii) in accordance with the terms applicable for US Federal Government officers or employees acting as part of their official duties; on a worldwide, perpetual, irrevocable, royalty-free basis to BMJ Publishing Group Ltd ("BMJ") its licensees and where the relevant Journal is co-owned by BMJ to the co-owners of the Journal, to publish the Work in this journal and any other BMJ products and to exploit all rights, as set out in our [licence](#).

The Submitting Author accepts and understands that any supply made under these terms is made by BMJ to the Submitting Author unless you are acting as an employee on behalf of your employer or a postgraduate student of an affiliated institution which is paying any applicable article publishing charge ("APC") for Open Access articles. Where the Submitting Author wishes to make the Work available on an Open Access basis (and intends to pay the relevant APC), the terms of reuse of such Open Access shall be governed by a Creative Commons licence – details of these licences and which [Creative Commons](#) licence will apply to this Work are set out in our licence referred to above.

Other than as permitted in any relevant BMJ Author's Self Archiving Policies, I confirm this Work has not been accepted for publication elsewhere, is not being considered for publication elsewhere and does not duplicate material already published. I confirm all authors consent to publication of this Work and authorise the granting of this licence.

1  
2  
3 1 **Long-term and serious harms of medical cannabis and cannabinoids for chronic pain: A**  
4  
5 2 **systematic review and meta-analysis of non-randomized studies**  
6  
7  
8 3  
9

10 4 **Dena Zeraatkar, *methodologist***

11 *Department of Health Research Methods, Evidence, and Impact, McMaster University, Hamilton, ON*

12 *Department of Biomedical Informatics, Harvard Medical School, Boston, MA*

13 7 **Matthew Adam Cooper, *medical student***

14 *Michael G. Degroote School of Medicine*

15 *McMaster University, Hamilton, ON*

16 10 **Arnav Agarwal, *resident physician***

17 *Department of Medicine*

18 *University of Toronto, Toronto, ON*

19 13 **Robin W. M. Vernooij, *methodologist***

20 *Netherlands Comprehensive Cancer Organization (IKNL)*

21 *Utrecht, the Netherlands*

22 16 **Gareth Leung, *methodologist***

23 *Department of Public Health and Primary Care,*

24 *University of Cambridge, Cambridge, UK*

25 19 **Kevin Loniewski, *nursing student***

26 *Faculty of Health, Seneca College, King City, ON.*

27 *York University, Toronto, ON*

28 22 **Jared E. Dookie, *medical student***

29 *Schulich School of Medicine and Dentistry*

30 *Western University, London, ON*

31 25 **Muhammad Muneeb Ahmed, *medical student***

32 *Michael G. Degroote School of Medicine*

33 *McMaster University, Hamilton, ON*

34 28 **Brian Younho Hong, *resident physician***

35 *Division of Plastic and Reconstructive Surgery*

36 *University of Toronto, Toronto, ON*

37 31 **Chris J. Hong, *resident physician***

38 *Department of Otolaryngology-Head & Neck Surgery*

39 *University of Toronto, Toronto, ON*

40 34 **Patrick Jiho Hong, *resident physician***

41 *Department of Anesthesiology and Pain Medicine*

42 *University of Toronto, Toronto, ON*

43 37 **Rachel Couban, *medical librarian***

44 *Department of Anesthesia*

45 *Department of Health Research Methods, Evidence, and Impact*

46 *McMaster University, Hamilton, ON*

47 41 **Thomas Agoritsas, *assistant professor***

48 *Department Medicine, University Hospitals of Geneva, Geneva, Switzerland*

49 *Department of Health Research Methods, Evidence, and Impact, McMaster University, Hamilton, ON*

50 44 **Jason W. Busse, *associate professor\****

51 *Department of Anesthesia*

52 *Department of Health Research Methods, Evidence, and Impact*

53 *McMaster University, Hamilton, ON*

54 *bussejw@mcmaster.ca*

1  
2  
3 50 \*Corresponding author

4  
5 51 **Running head:** Harms of medical cannabis

6 52 **Abbreviations:** Cochrane Central Register of Controlled Trials (CENTRAL), Palmitoylethanolamide (PEA),  
7  
8 53 tetrahydrocannabinol (THC)

9  
10 54 **Keywords:** Medical cannabis, chronic pain, adverse events, harms, non-randomized studies,  
11  
12 55 observational, systematic review, meta-analysis

13 56 **Disclaimers:** None.

14  
15 57 **Funding:** DZ is supported by a Banting Postdoctoral Fellowship.

16 58 **Ethics approval:** The systematic review is exempt from ethics approval.

17  
18 59 **Data:** Data will be made available upon publication: <https://osf.io/ut36z/>

19  
20 60 **Acknowledgements:** We thank the members of the Rapid Recommendations panel for critical feedback  
21  
22 61 on the selection of the adverse events of interest. We thank James MacKillop, PhD, for his help with the  
23  
24 62 interpretation of problematic cannabis use, abuse, dependence and withdrawal syndrome within studies.

25 63 **Authors' Contributions:** JWB and TA conceived the idea. RC designed and conducted the search. DZ, MAC,  
26  
27 64 AA, GL, KL, JD, BYH, CH, and PJH screened search records, extracted data, and assessed the risk of bias of  
28  
29 65 the eligible studies. DZ conducted analyses. DZ, JWB, and TA interpreted the data. DZ wrote the first draft  
30  
31 66 of the manuscript. JWB and TA critically revised the manuscript. All authors reviewed and approved the  
32  
33 67 final version. DZ and JWB are the guarantors.

34  
35 68  
36 69 \* I, the Submitting Author, have the right to grant and does grant on behalf of all authors of the Work (as  
37  
38 70 defined in the author licence), an exclusive licence and/or a non-exclusive licence for contributions from  
39  
40 71 authors who are: i) UK Crown employees; ii) where BMJ has agreed a CC-BY licence shall apply, and/or iii)  
41  
42 72 in accordance with the terms applicable for US Federal Government officers or employees acting as part  
43  
44 73 of their official duties; on a worldwide, perpetual, irrevocable, royalty-free basis to BMJ Publishing Group  
45  
46 74 Ltd ("BMJ") its licensees.

47 75  
48  
49  
50  
51  
52  
53  
54  
55  
56  
57  
58  
59  
60 76 Word count: 5,170

1  
2  
3 77 **Abstract**  
4

5  
6 78 **Objective:** To establish the risk and prevalence of long-term and serious harms of medical cannabis and  
7  
8 79 cannabinoids for chronic pain.  
9

10 80 **Design:** Systematic review and meta-analysis.  
11

12  
13 81 **Data sources:** MEDLINE, EMBASE, PsycInfo, and the Cochrane Central Register of Controlled Trials  
14  
15 82 (CENTRAL) from inception to April 1, 2020.  
16

17 83 **Study selection:** Non-randomized studies reporting on harms of medical cannabis or cannabinoids in  
18  
19 84 adults or children living with chronic pain with  $\geq 4$  weeks of follow-up.  
20

21  
22 85 **Data extraction and synthesis:** A parallel guideline panel provided input on the design and interpretation  
23  
24 86 of the systematic review, including selection of adverse events for consideration. Two reviewers, working  
25  
26 87 independently and in duplicate, screened the search results, extracted data, and assessed risk of bias. We  
27  
28 88 used random-effects models for all meta-analyses and the GRADE approach to evaluate the certainty of  
29  
30 89 evidence.  
31

32 90 **Results:** We identified 39 eligible studies that enrolled 12,143 adult patients with chronic pain. Very low  
33  
34 91 certainty evidence suggests that adverse events are common (prevalence: 26.0%; 95% CI 13.2 to 41.2)  
35  
36 92 among users of medical cannabis or cannabinoids for chronic pain, particularly any psychiatric adverse  
37  
38 93 events (prevalence: 13.5%; 95% CI 2.6 to 30.6). Very low certainty evidence, however, indicates serious  
39  
40 94 adverse events, adverse events leading to discontinuation, cognitive adverse events, accidents and  
41  
42 95 injuries, and dependence and withdrawal syndrome are uncommon and each typically occur in fewer than  
43  
44 96 one in 20 patients. We compared studies with  $< 24$  weeks and  $\geq 24$  weeks of cannabis use and found more  
45  
46 97 adverse events reported among studies with longer follow-up (test for interaction  $p < 0.01$ ).  
47  
48 98 Palmitoylethanolamide was usually associated with few to no adverse events. We found insufficient  
49  
50 99 evidence addressing the harms of medical cannabis compared to other pain management options, such  
51  
52 100 as opioids.  
53

54 101 **Conclusions:** There is very low certainty evidence that adverse events are common among people living  
55  
56 102 with chronic pain who use medical cannabis or cannabinoids, but that few patients experience serious  
57  
58 103 adverse events. Future research should compare long-term and serious harms of medical cannabis with  
59  
60 104 other management options for chronic pain, including opioids.

1  
2  
3  
4  
5  
6  
7  
8  
9  
10  
11  
12  
13  
14  
15  
16  
17  
18  
19  
20  
21  
22  
23  
24  
25  
26  
27  
28  
29  
30  
31  
32  
33  
34  
35  
36  
37  
38  
39  
40  
41  
42  
43  
44  
45  
46  
47  
48  
49  
50  
51  
52  
53  
54  
55  
56  
57  
58  
59  
60

105    **Systematic review registration** <https://osf.io/25bxf>

For peer review only

1  
2  
3 106 **What is already known on this topic**  
4  
5

- 6 107     • Medical cannabis and cannabinoids are increasingly used for the management of chronic pain.  
7  
8 108     • Clinicians and patients considering medical cannabis or cannabinoids as a treatment option for  
9  
10 109     chronic pain require evidence on benefits and harms, including long-term and serious adverse  
11 110     events to make informed decisions.  
12

13  
14 111 **What this study adds**  
15

- 16 112     • Very low certainty evidence suggests that adverse events are common among people living with  
17 113     chronic pain who use medical cannabis or cannabinoids, including psychiatric adverse events,  
18 114     though serious adverse events, adverse events leading to discontinuation, cognitive adverse  
19 115     events, accidents and injuries, and dependence and withdrawal syndrome are uncommon.  
20  
21 116     • There is insufficient evidence comparing the harms of medical cannabis or cannabinoids to other  
22 117     pain management options, such as opioids.  
23  
24  
25  
26  
27  
28  
29  
30  
31  
32  
33  
34  
35  
36  
37  
38  
39  
40  
41  
42  
43  
44  
45  
46  
47  
48  
49  
50  
51  
52  
53  
54  
55  
56  
57  
58  
59  
60



## 120 **Background**

121 Chronic pain is the primary cause of health care resource use and disability among working adults in North  
122 America and Western Europe.<sup>1 2</sup> The use of cannabis for the management of chronic pain is becoming  
123 increasingly common due to pressure to reduce opioid use, increased availability and changing legislation,  
124 shift in public attitudes and decreased stigma, and aggressive marketing.<sup>3 4</sup> The two most-studied  
125 cannabinoids in medical cannabis are delta-9-tetrahydrocannabinol (THC) and cannabidiol (CBD).<sup>5</sup> THC  
126 binds to cannabinoid receptors type 1 and 2, is an analog to the endogenous cannabinoid, anandamide,  
127 and has shown psychoactive, analgesic, anti-inflammatory, antioxidant, antipruritic, anti-spasmodic, and  
128 muscle-relaxant activities. CBD directly interacts with various ion channels to produce analgesic, anti-  
129 inflammatory, anti-convulsant and anxiolytic activities, without the psychoactive effect of THC.<sup>5</sup> Use of  
130 cannabis for therapeutic purposes, however, remains contentious due to the social and legal context and  
131 its known and suspected harms.<sup>6-9</sup>

132 Though common adverse events caused by medical cannabis, including nausea, vomiting, headache,  
133 drowsiness, and dizziness, have been well documented in randomized controlled trials and reviews of  
134 randomized controlled trials,<sup>10 11</sup> less is known about potentially uncommon but serious adverse events,  
135 particularly events that may occur with longer durations of medical cannabis use, such as dependence,  
136 withdrawal symptoms, and psychosis.<sup>4 12-17</sup> Such adverse events are usually observed in large non-  
137 randomized studies that recruit larger numbers of patients and typically follow them for longer durations  
138 of time. Further, evidence from non-randomized studies may be more generalizable, since randomized  
139 controlled trials typically use strict eligibility criteria. There have been no reviews of systematic reviews  
140 and existing systematic reviews have not consistently meta-analyzed the risks or prevalence of adverse  
141 events from non-randomized studies nor have they addressed adverse events that may be particularly  
142 important to patients such as serious and potentially fatal adverse events.

143 The objective of this systematic review and meta-analysis is to summarize the evidence on the risks and,  
144 when evidence on risk is not available, the prevalence of adverse events related to medical cannabis and  
145 cannabinoids from non-randomized studies for a new *BMJ Rapid Recommendation* guideline addressing  
146 medical cannabis for chronic pain.<sup>18</sup> This evidence synthesis is part of the *BMJ Rapid Recommendations*  
147 project, a collaborative effort from the *MAGIC Evidence Ecosystem Foundation* ([www.magicevidence.org](http://www.magicevidence.org))  
148 and the *BMJ*.<sup>19</sup> A guideline panel helped define the study question and selected adverse events for review.  
149 The adverse events of interest include psychiatric and cognitive adverse events, injuries and accidents,

1  
2  
3 150 and dependence and withdrawal. It is one of four systematic reviews that together informed a parallel  
4  
5 151 guideline.<sup>11 18 20 21</sup> A parallel systematic review addressed evidence from randomized trials.<sup>11</sup>

6  
7 152

## 10 153 **Methods**

11  
12 154 We report our systematic review in accordance with the PRISMA Harms Checklist.<sup>22</sup> We registered the  
13  
14 155 protocol for our review at OSF (<https://osf.io/25bxf>) and followed this protocol unless otherwise reported  
15  
16 156 in this manuscript.<sup>22</sup>

### 18 157 ***Guideline panel involvement***

19  
20  
21 158 A guideline panel helped define the study question and selected the adverse events for review. The panel  
22  
23 159 included nine content experts (two general internists, two family physicians, a pediatrician, a physiatrist,  
24  
25 160 a pediatric anesthesiologist, a clinical pharmacologist, and a rheumatologist), nine methodologists (five of  
26  
27 161 whom are also front-line clinicians), and three people living with chronic pain (one of whom used  
28  
29 162 cannabinoids for medical purposes).

### 30 163 ***Patient and public involvement***

31  
32 164 Three patient partners were included as part of the guideline panel and contributed to the selection and  
33  
34 165 prioritization of outcomes, protocol, and interpretation of review findings, and provided insight on values  
35  
36 166 and preferences.

### 38 167 ***Search***

39  
40 168 A medical librarian searched MEDLINE, EMBASE, PsychInfo, and Cochrane Central Register of Controlled  
41  
42 169 Trials (CENTRAL) from inception to April 1, 2020, with no restrictions on language, for non-randomized  
43  
44 170 studies reporting on harms or adverse events of medical cannabis or cannabinoids for chronic pain  
45  
46 171 (Appendix 1). We scanned reference lists of relevant reviews to identify any eligible studies not retrieved  
47  
48 172 by our electronic search and solicited content experts from our panel for unpublished studies. Search  
49  
50 173 records, and later full-texts of studies, not reported in English were translated by a native speaker of the  
51  
52 174 language.

### 175 **Study selection**

176 Reviewers (DZ, MAC, AA, RWMV, GL, KL, JED, MMA, BYH, CJH, PJH), working independently and in  
177 duplicate, reviewed titles and abstracts of search records and subsequently full texts of records found  
178 potentially eligible at the title and abstract screening stage. Reviewers resolved disagreements by  
179 discussion or by adjudication by a third reviewer (DZ).

180 We included all non-randomized studies that reported on any patient-important harm or adverse event  
181 associated with the use of any formulation of medical cannabis or cannabinoids in adults or children, living  
182 with chronic pain (pain lasting for  $\geq 3$  months) or a medical condition associated with chronic pain (i.e.,  
183 fibromyalgia, arthritis, multiple sclerosis, neuropathy, inflammatory bowel disease, stroke, or advanced  
184 cancer) or that compared adverse events associated with medical cannabis or cannabinoids with another  
185 pharmacologic or non-pharmacologic intervention. We considered herbal cannabis consumed for medical  
186 reasons as medical cannabis. Based on input from the guideline panel, we excluded studies in which  
187 patients used cannabis for less than 4 weeks because we anticipated that four weeks would be the  
188 minimum amount of time after which we would reasonably expect to observe potential serious or long  
189 term harms associated with medical cannabis.<sup>23</sup> We looked for explicit statements or evidence that  
190 patients were experiencing chronic pain. We excluded studies in which: (1) fewer than 25 patients used  
191 medical cannabis or cannabinoids (to exclude studies that would not appreciably contribute to pooled  
192 estimates and studies that may be too small to reliably estimate the prevalence of adverse events), (2)  
193 patients did not suffer from chronic pain or a condition that commonly causes chronic pain or more than  
194 20% of patients reported using medical cannabis or cannabinoids for a condition other than chronic pain  
195 (to exclude studies in which patients did not predominantly suffer from chronic pain), (3) patients were  
196 using medical cannabis for recreational reasons, (4) only surrogate measures of patient-important harms  
197 and adverse effects (e.g., performance on cognitive tests, lab values) were reported, and (5) systematic  
198 reviews and other types of studies that did not describe primary data. We also excluded studies that  
199 reported on the same data for the same participants.

### 200 **Data extraction and risk of bias**

201 Reviewers (DZ, MAC, AA, RWMV, GL, KL, JED, MMA, BYH, CJH, PJH), working independently and in  
202 duplicate and using a standardized and pilot-tested data collection form, extracted the following  
203 information from each eligible study: (1) study design, (2) patient characteristics (age, sex,  
204 condition/diagnosis), (3) characteristics of medical cannabis or cannabinoids (name of product, dose, and

1  
2  
3 205 duration), and (4) number of patients that experienced adverse events, including all adverse events,  
4  
5 206 serious adverse events, and withdrawal due to adverse events. Reviewers resolved disagreements by  
6  
7 207 discussion or by adjudication with a third party (DZ). We classified adverse events as serious based on the  
8  
9 208 classification used in primary studies. For comparative studies, we collected results from models adjusted  
10  
11 209 for confounders, when reported, and unadjusted models when results for adjusted models were not  
12  
13 210 reported.

14 211 When studies reported the number of events rather than the number of patients experiencing adverse  
15  
16 212 events, we only extracted the number of events if they were infrequent (the number of events accounted  
17  
18 213 for less than 10% of the total number of study participants). For studies that reported on adverse events  
19  
20 214 at multiple timepoints, we extracted data for the longest point of follow-up that included, at minimum,  
21  
22 215 80% of the patients recruited into the study. Reviewers resolved disagreements by discussion or by  
23  
24 216 adjudication with a third reviewer (DZ).

25 217 Reviewers (DZ, MAC, AA, RWMV, GL, KL, JED, MMA, BYH, CJH, PJH), working independently and in  
26  
27 218 duplicate, used the Cochrane-endorsed ROBINS-I tool to rate the risk of bias of studies as low, moderate,  
28  
29 219 serious, or critical across seven domains: (1) bias due to confounding, (2) selection of patients into the  
30  
31 220 study, (3) classification of the intervention, (4) bias due to deviations from the intended intervention, (5)  
32  
33 221 missing data, (6) measurement of outcomes, and (7) selection of reported results.<sup>24</sup> Reviewers resolved  
34  
35 222 discrepancies by discussion or by adjudication by a third party (DZ). Appendix 2 presents additional details  
36  
37 223 on the assessment of risk of bias. Studies were considered to adequately adjust for confounders if they  
38  
39 224 adjusted, at minimum, for pain intensity, concomitant pain medication, disability status, alcohol use, past  
40  
41 225 cannabis use. Studies were rated at low risk of bias overall when all domains were at low risk of bias;  
42  
43 226 moderate risk of bias if all domains were rated at low or moderate risk of bias; at serious risk of bias when  
44  
45 227 all domains were rated either at low, moderate, or serious risk of bias; and at critical risk of bias when one  
46  
47 228 or more domains were rated as critical.

### 48 229 ***Data synthesis***

49 230 In this review, we synthesized data on serious adverse events and adverse events that may emerge with  
50  
51 231 longer duration of medical cannabis use for which data is typically not reported in randomized trials.  
52  
53 232 Identified by a parallel BMJ Rapid Recommendations guideline panel as important, these patient-  
54  
55 233 important outcomes included psychiatric and cognitive adverse events, injuries and accidents, and  
56  
57 234 dependence and withdrawal. Data on all other adverse events reported in primary studies are available

235 in an open-access database (<https://osf.io/ut36z/>). We classified adverse events as serious based on the  
236 classification used in primary studies.

237 Adverse events are reported as binary outcomes. For comparative studies, when possible, we present risk  
238 differences and associated 95% confidence intervals (95% CIs). Since there were only two eligible  
239 comparative studies, each with different comparators, we did not perform meta-analysis. For single-arm  
240 studies, we pooled the proportion of patients experiencing adverse events of interest by first applying a  
241 Freeman-Tukey type arcsine square root transformation to stabilize the variance. Without this  
242 transformation, very high or very low prevalence estimates can produce confidence intervals that contain  
243 values lower than 0% or higher than 100%. All meta-analyses used DerSimonian-Laird random-effects  
244 models, which are conservative as they consider both within- and between-study variability.<sup>25-27</sup> We  
245 evaluated heterogeneity for all pooled estimates through visual inspection of forest plots and calculation  
246 of tau-squared ( $\tau^2$ ), because some statistical tests of heterogeneity ( $I^2$  and Cochrane's Q) can be misleading  
247 when sample sizes are large and CIs are therefore narrow.<sup>28</sup> Higher values of  $\tau^2$ ,  $I^2$ , and Cochrane's Q  
248 indicate higher statistical heterogeneity. For studies that reported estimates for all-cause adverse events  
249 and those deemed to be potentially related to cannabis use, we preferentially synthesized results for all  
250 adverse events.

251 For analyses for which we observed high clinical heterogeneity (i.e., substantial differences in the  
252 estimates of individual studies and minimal overlap in the confidence intervals), we presented results  
253 narratively.

254 In consultation with the parallel BMJ Rapid Recommendations guideline panel, we also prespecified six  
255 subgroup hypotheses to explain heterogeneity between studies: (1) study design (longitudinal vs. cross-  
256 sectional), (2) type of medical cannabis, (3) cancer vs. non-cancer pain, (4) children vs. adults, (5) duration  
257 of medical cannabis use (shorter or longer than the median duration of follow-up across studies), and (6)  
258 risk of bias (low/moderate vs. serious/critical). We also performed two post-hoc subgroup analyses: (1)  
259 duration of follow-up (shorter or longer than the median duration of follow-up across studies) and (2)  
260 selection bias (studies at moderate, serious, or critical risk of selection bias vs. studies at low risk of  
261 selection bias). We anticipated that studies reporting on shorter use of medical cannabis, as well as cross-  
262 sectional studies, studies on cancer patients, studies including adults, studies with active comparators,  
263 studies at high risk of bias would report fewer adverse events. We anticipated that studies at moderate,  
264 serious, or critical risk of selection bias that included prevalent cannabis users (i.e., people who were using

1  
2  
3 265 medical cannabis before the inception of the study) or were preceded by a run-in period or clinical trial  
4  
5 266 during which patients that experienced adverse events or found medical cannabis intolerable could  
6  
7 267 discontinue would report fewer adverse events because prevalent of medical cannabis are likely to  
8  
9 268 represent populations that have self-selected for tolerance to cannabis. We performed tests for  
10  
11 269 interaction to establish whether subgroups differed significantly from one another. We assessed the  
12  
13 270 credibility of significant subgroup effects (test for interaction  $p < .05$ ) using published criteria.<sup>29 30</sup>

14 271 We performed all analyses using the 'meta' package in R (version 3.5.1, R Foundation for Statistical  
15  
16 272 Computing).<sup>31</sup>

### 18 273 ***Certainty of evidence***

20  
21 274 We used the GRADE approach to rate the certainty of evidence.<sup>32 33</sup> Based on GRADE guidance for using  
22  
23 275 the ROBINS-I tool, evidence starts at high certainty and is downgraded by one level when the majority of  
24  
25 276 the evidence comes from studies at moderate risk of bias, two levels when the majority of the evidence  
26  
27 277 comes from studies at high risk of bias, and three levels when the majority of the evidence comes from  
28  
29 278 studies rated at critical risk of bias.<sup>32</sup> We additionally considered potential limitations due to indirectness  
30  
31 279 if the population, intervention, or adverse events assessed in studies did not reflect the populations,  
32  
33 280 interventions, or adverse events of interest, inconsistency if there was important unexplained differences  
34  
35 281 in the results of studies, and imprecision if the upper and lower bounds of confidence intervals indicated  
36  
37 282 appreciably different rates of adverse events. For assessing inconsistency and imprecision for the outcome  
38  
39 283 all adverse events, based on feedback from the guideline panel, we deemed a 20% difference in the  
40  
41 284 prevalence of all adverse evidence to be patient-important; a 10% difference for adverse events leading  
42  
43 285 to discontinuation, serious adverse events, and psychiatric, cognitive, withdrawal and dependence,  
44  
45 286 injuries; and a 3% difference for potentially fatal adverse events, such as suicides and motor vehicle  
46  
47 287 accidents. We followed GRADE guidance for communicating our findings.<sup>34</sup> Guideline panel members  
48  
49 288 interpreted the magnitude of adverse events and decided whether the observed prevalence of adverse  
50  
51 289 events was sufficient to affect patients' decisions to use medical cannabis or cannabinoids for chronic pain.

## 49 290 **Results**

### 52 291 ***Study selection***

53  
54 292 Our search yielded 17,178 unique records of which 434 were reviewed in full. We excluded more than  
55  
56 293 half of references because they did not describe a non-randomized study, a quarter because they did not

1  
2  
3 294 include patients with chronic pain, and a small minority because they did not report on adverse events.  
4  
5 295 Of these records, 39 non-randomized studies were eligible for review (Appendix 3).<sup>35-73</sup> Figure 1 presents  
6  
7 296 additional details related to study selection. Appendix 4 presents studies excluded at the full-text  
8  
9 297 screening stage and accompanying reasons for exclusion.

### 11 298 **Description of studies**

13 299 One study was published in German and the remainder in English. Studies included 12,143 adults living  
14  
15 300 with chronic pain and included a median of 100 (IQR 34 to 361) participants (Table 1). Most studies (30/39;  
16  
17 301 76.9%) were longitudinal in design. Eighteen studies (46.2 %) were conducted in Western Europe,  
18  
19 302 fourteen (35.9%) in North America, six (15.4%) in Israel, and two (5.1%) in the United Kingdom. Ten studies  
20  
21 303 (25.6%) were funded by industry alone or industry in combination with government and institutional  
22  
23 304 funds; the remainder were funded either by governments, institutions, or not-for-profit organizations  
24  
25 305 (n=9; 23.1%), did not receive funds (n=3; 7.7%), or did not report funding information (n=17; 43.6%).

26 306 Thirty studies (76.9%) reported on people living with chronic non-cancer pain, eight (n=20.5%) with mixed  
27  
28 307 cancer and non-cancer chronic pain, and one (2.6%) with chronic cancer pain. All studies reported on  
29  
30 308 adults. Sixteen studies reported on mixed types of herbal cannabis (e.g., buds for smoking, vaporizing, and  
31  
32 309 ingesting, hashish, oils, extracts, edibles), nine on palmitoylethanolamide (PEA), four each on nabiximols  
33  
34 310 and dronabinol, two on nabilone, one each on Trokie lozenges and extracts, and four did not report the  
35  
36 311 type of medical cannabis used. One study reported on three types of medical cannabis (dronabinol,  
37  
38 312 nabiximols, and mixed herbal) separately. The median duration of medical cannabis use was 24 weeks  
39  
40 313 (IQR 12.0 to 33.8 weeks). Two studies were comparative: one study compared nabilone with gabapentin  
41  
42 314 and another compared herbal cannabis with standard care.<sup>39 48</sup> Studies reported a total of 525 unique  
43  
44 315 adverse events.

### 44 316 **Risk of bias**

46 317 Appendix 5 presents the risk of bias of included studies. We rated all results at critical risk of bias except  
47  
48 318 for the comparative results from two studies,<sup>39 48</sup> which were rated at serious and moderate risk of bias.  
49  
50 319 The primary limitation across studies was inadequate control for potential confounding either due to the  
51  
52 320 absence of a control group or inadequate adjustment for confounders. A third of studies were rated at  
53  
54 321 serious risk of bias for selection bias, primarily because they included prevalent users of medical cannabis.  
55  
56 322 Such studies may underestimate the incidence of adverse events since patients that experience adverse

1  
2  
3 323 events are more likely to discontinue medical cannabis early. Such studies may also include adverse events  
4  
5 324 that may have been present at inception and that are unrelated to medical cannabis use.

6  
7 325 ***All adverse events***

8  
9 326 Twenty longitudinal and two cross-sectional studies, including 4,108 patients, reported the number of  
10  
11 327 patients experiencing one or more adverse events.<sup>36-43 46 47 54 56-60 62 64 65 69 70 73</sup> Seven studies reported on  
12  
13 328 PEA, five on mixed herbal cannabis, three each on nabilone and nabiximols, two on dronabinol, and one  
14  
15 329 each on extracts and Trokie lozenges. The median duration of medical cannabis use was 24 weeks [IQR 12  
16  
17 330 to 32]. We observed substantial unexplained heterogeneity and so summarize the results descriptively  
18  
19 331 (Appendices 6 to 9). The prevalence of any adverse event ranged between 0% to 92.1%. Studies with less  
20  
21 332 than 24 weeks of cannabis use (the median duration of cannabis) typically reported fewer adverse events  
22  
23 333 than those with more than 24 weeks. Patients using PEA experienced no adverse events. The evidence  
24  
25 334 was overall very uncertain due to risk of bias and inconsistency.

26 335 One study suggested that nabilone may reduce the risk of adverse events compared to gabapentin (-  
27  
28 336 13.1%; 95% CI -26.2 to 0), but the certainty of evidence was very low due to risk of bias and imprecision  
29  
30 337 (Table 2).

31  
32 338 ***Adverse events leading to discontinuation***

33  
34 339 Twenty longitudinal studies, including 6,509 patients, reported on the number of patients that  
35  
36 340 discontinued medical cannabis or cannabinoids due to adverse events.<sup>37 39 41-44 46-49 52 54 56 57 59 62 63 65 70 73</sup>  
37  
38 341 Eight studies reported on PEA, four studies on mixed herbal cannabis, three on nabiximols, two on  
39  
40 342 nabilone, and one each on dronabinol and extracts, and one study did not report the type of medical  
41  
42 343 cannabis used by patients. The median duration of cannabis use was 24 weeks [IQR 8.6 to 32]. We  
43  
44 344 observed substantial unexplained heterogeneity and so summarize the results descriptively (Appendices  
45  
46 345 10 to 12). The prevalence of discontinuations due to adverse events ranged between 0% to 27.0%. Studies  
47  
48 346 with less than 24 weeks of cannabis use typically reported fewer discontinuations than those with more  
49  
50 347 than 24 weeks. Patients using PEA experienced no adverse events. The evidence was overall very  
51  
52 348 uncertain due to risk of bias and inconsistency.

53  
54 349 One study suggested herbal cannabis may increase the risk of adverse events leading to discontinuation  
55  
56 350 compared to standard care without cannabis (4.7%; 95% CI 1.8 to 7.5). Another study suggested that  
57  
58 351 nabilone may reduce the risk of adverse events leading to discontinuation compared to gabapentin (-



352 9.4%; 95% CI -18.5 to -0.2). The certainty of evidence was low to very low due to risk of bias and  
353 imprecision.

### 354 ***Serious adverse events***

355 Twenty-two longitudinal and two cross-sectional studies, including 4,273 patients, reported on the  
356 number of patients experiencing one or more serious adverse events.<sup>35-37 39-43 46 48 49 52 54-60 62 65 70 71 73</sup> Eight  
357 studies reported on mixed herbal cannabis, eight on PEA, two each on nabilone and nabiximols each, and  
358 one study each on dronabinol, extracts, and Trokie lozenges, and one study did not report the type of  
359 cannabis used. The median duration of medical cannabis or cannabinoid use was 24 weeks (IQR 12 to 32),  
360 and few patients experienced serious adverse events (1.2%; 95% CI 0.1 to 3.1;  $I^2=91%$ ) (Figure 2)  
361 (Appendices 13 to 15). There was a statistically significant subgroup effect across different types of  
362 medical cannabis though serious adverse events appeared consistently uncommon among different types  
363 (low credibility). The certainty of evidence was very low overall due to serious risk of bias.

364 One study suggested herbal cannabis increased the risk of serious adverse events compared to standard  
365 care without cannabis (1.5%; 95% CI -8.3 to 20.2). Another study found use of nabilone vs. gabapentin  
366 showed no difference in the risk of serious adverse events. The certainty of evidence was low to very low  
367 for both studies due to risk of bias and imprecision.

### 368 ***Psychiatric adverse events***

369 Eleven longitudinal and two cross-sectional studies, including 6,600 patients, reported on any psychiatric  
370 adverse events, including psychiatric disorders, suicide, suicidal thoughts, depression, mania,  
371 hallucinations, delusions, paranoia, anxiety, and euphoria (Appendices 16 to 25).<sup>35-37 43 47 48 60 63 67 68 70</sup> Five  
372 studies reported on mixed herbal cannabis, four on nabiximols, one each on dronabinol, nabilone, and  
373 mixed types and one study did not specify the type of medical cannabis. The median duration of cannabis  
374 use across studies was 52 weeks (IQR 20 to 52). Approximately one in seven medical cannabis users  
375 experienced one or more psychiatric disorders or adverse events (13.5%; 95% CI 2.6 to 30.6;  $I^2=98%$ ). The  
376 most frequently occurring psychiatric adverse events were paranoia (5.6%; 9% CI 0 to 19.2;  $I^2=85%$ ) and  
377 anxiety (7.4%; 95% CI 0 to 26.9;  $I^2=99%$ ). The certainty of evidence was very low due to risk of bias,  
378 inconsistency (for psychiatric disorders and paranoia), and imprecision (for psychiatric disorder, paranoia,  
379 and anxiety).

1  
2  
3 380 One study suggested that herbal cannabis may result in a trivial to moderate increase in the risk for  
4  
5 381 psychiatric disorders, mania, hallucinations, depression, paranoia, anxiety, and euphoria and a reduction  
6  
7 382 in the risk for suicides and delusions, compared with standard care without cannabis, though the certainty  
8  
9 383 of evidence was low to very low due to risk of bias and imprecision.

#### 10 384 ***Cognitive and attentional adverse events***

11  
12 385 Eleven longitudinal studies, including 6,257 patients, reported on cognitive adverse events, including  
13  
14 386 memory impairment, confusion, disorientation, and impaired attention (Appendices 26 to 29).<sup>35-37 43 47 48</sup>  
15  
16 387 <sup>60 63 67 68 70</sup> Five studies reported on herbal cannabis, three on nabiximols, three on mixed types of cannabis,  
17  
18 388 and one each on dronabinol and nabilone. The median duration of cannabis use was 52 weeks (IQR 24 to  
19  
20 389 52). The prevalence of cognitive adverse events ranged from 1.6% (95% CI 0.6 to 3.0; I<sup>2</sup>=88%) to 5.3% (95%  
21  
22 390 CI 2.1 to 9.6; I<sup>2</sup>=96%) for disorientation and memory impairment, respectively. The certainty of evidence  
23  
24 391 was very low due to risk of bias.

25  
26 392 One study suggests herbal cannabis may slightly increase the risk for memory impairment and  
27  
28 393 disturbances in attention compared to standard care without cannabis, but reduce the risk for confusion,  
29  
30 394 though the certainty of evidence was low to very low due to risk of bias and imprecision.

#### 31 395 ***Accidents and injuries***

32  
33  
34 396 One longitudinal study, including 431 patients, reported on accidents and injuries in patients using mixed  
35  
36 397 herbal cannabis for 52 weeks (Appendices 30 & 31).<sup>48</sup> This study suggests herbal cannabis used for medical  
37  
38 398 purposes may slightly increase the risk of motor vehicle accidents (0.5%; 95% CI -0.4 to 1.4) but may not  
39  
40 399 increase the risk of falls (0%; 95% CI -2.8 to 2.9). The certainty of evidence was low due to risk of bias.

#### 41 400 ***Dependence and withdrawal***

42  
43 401 Four longitudinal and one cross-sectional study, including 2,248 patients, reported on dependence-  
44  
45 402 related adverse events, including dependence (one study reported on 'abuse' based on unspecified  
46  
47 403 criteria, one study reported on 'problematic use' using the Alcohol Use Disorder and Associated  
48  
49 404 Disabilities Interview Schedule–Diagnostic and Statistical Manual of Mental Disorders–Fourth Edition  
50  
51 405 (AUDADIS-IV)<sup>74</sup>, and one study reported on 'dependence' using the Alcohol, Smoking, and Substance  
52  
53 406 Involvement Screening Test<sup>75</sup>), withdrawal symptoms (defined as one or moderate or severe withdrawal  
54  
55 407 symptoms including sleep difficulties, anxiety, irritability, and appetite disturbance), and withdrawal  
56  
57 408 syndrome (two studies that used unspecified criteria) (Appendices 32 to 34).<sup>48 53 56 67 70</sup> Two studies

1  
2  
3 409 reported on herbal cannabis, one each on nabiximols and nabilone, and one did not specify type of  
4  
5 410 medical cannabis used by patients. Follow-up ranged from 12 to 52 weeks. Though dependence and  
6  
7 411 withdrawal syndrome were uncommon with a prevalence of 4.4% (95% CI 0.0 to 19.9;  $I^2=99%$ ) and 2.1%  
8  
9 412 (95% CI 0 to 8.2;  $I^2=89%$ ), respectively, withdrawal symptoms were common (67.8%; 95% CI 64.1 to 71.4).  
10 413 The certainty of evidence was very low due to risk of bias, inconsistency, imprecision (for dependence),  
11 414 and indirectness due to definitions of outcomes in studies were too vague to confidently distinguish  
12  
13 415 between dependence, addiction, withdrawal symptoms, and withdrawal syndrome.

14  
15  
16 416 One study suggested that herbal cannabis compared to standard care may slightly increase the risk of  
17  
18 417 withdrawal syndrome (0.5%; 95% CI -0.4 to 1.4) but the certainty of evidence was low due to risk of bias.

## 418 **Discussion**

### 419 ***Main findings***

420 Our systematic review and meta-analysis provides evidence that adverse events are common among  
421 people living with chronic pain who use medical cannabis or cannabinoids, with approximately one in four  
422 experiencing at least one adverse event—though the certainty of evidence is very low and the true  
423 prevalence of adverse events may be substantially different. In contrast, serious adverse events, adverse  
424 events leading to discontinuation, cognitive adverse events, accidents and injuries, and dependence and  
425 withdrawal syndrome are uncommon. We compared studies with <24 weeks and  $\geq 24$  weeks cannabis  
426 use and found more adverse events reported among studies with longer follow-up. This may be explained  
427 by increased tolerance (tachyphylaxis) with prolonged exposure, necessitating increases in dosage with  
428 consequent increased risk of harms. PEA, compared to other formulations of medical cannabis, may result  
429 in the fewest adverse events. Though adverse events appear to be common, few patients discontinued  
430 medical cannabis due to adverse events suggesting that most adverse events are transient and/or  
431 outweighed by perceived benefits.

432 Our review represents the most comprehensive review of evidence from non-randomized studies  
433 addressing adverse events of medical cannabis or cannabinoid use in people living with chronic pain.  
434 While several previous reviews have summarized the evidence on short-term and common adverse events  
435 of medical cannabis reported in randomized trials, such as oral discomfort, dizziness, and headaches, our  
436 review focuses on serious and rare adverse events—the choice of which was informed by a panel including  
437 patients, clinicians, and methodologists—and non-randomized studies, which can follow larger numbers  
438 of patients for longer periods of time and thus may detect adverse events that are infrequent or that are

1  
2  
3 439 associated with longer durations of cannabis use.<sup>10 76-80</sup> A parallel systematic review of evidence from  
4  
5 440 randomized controlled trials found no evidence to inform long-term harms of medical cannabis as no  
6  
7 441 eligible trial followed patients for more than 5.5 months.<sup>11</sup> One previously published review that included  
8  
9 442 non-randomized studies searched the literature until 2007, included studies exploring medical cannabis  
10  
11 443 for any indication (excluding synthetic cannabinoids) of which only two enrolled people living with chronic  
12  
13 444 pain.<sup>12</sup> The review also did not synthesize adverse event data from non-randomized studies.<sup>12</sup> Unlike  
14  
15 445 previous reviews, we focused exclusively on medical cannabis for chronic pain and excluded recreational  
16  
17 446 cannabis, because cannabis used for recreational purposes often contains higher concentrations of  
18  
19 447 tetrahydrocannabinol (THC) than medical cannabis. We also focused on chronic pain because this patient  
20  
21 448 population may be susceptible to different adverse events. Depression and anxiety, for example, are  
22  
23 449 commonly occurring comorbidities of chronic pain, which may be exacerbated by cannabis.<sup>15-17</sup>

### 24 25 450 ***Strengths and limitations***

26  
27 451 Strengths of this systematic review and meta-analysis include a comprehensive search for non-  
28  
29 452 randomized studies, explicit eligibility criteria, screening of studies and collection of data in duplicate to  
30  
31 453 increase reliability, and use of the GRADE approach to evaluate the certainty of evidence.

32  
33 454 Our review is limited by the non-comparative design of most studies, which precludes confident  
34  
35 455 inferences regarding the proportion of adverse events that can be attributed to medical cannabis or  
36  
37 456 cannabinoids and the magnitude by which medical cannabis may increase or decrease the risk of adverse  
38  
39 457 events compared to other pain management options. Though adverse events appear common among  
40  
41 458 medical cannabis users, it is possible that other management options for chronic pain, particularly opioids,  
42  
43 459 may be associated with more (and more severe) adverse events.<sup>81</sup> Partly due to the non-comparative  
44  
45 460 design of most studies, nearly all results included in our review were at serious or critical risk of bias for  
46  
47 461 confounding and Simpson's paradox,<sup>82</sup> either due to the absence of a control group or due to insufficient  
48  
49 462 adjustment for important confounders. Further, a third of studies were at high risk of selection bias,  
50  
51 463 primarily because they included prevalent cannabis users. In such studies, the prevalence of adverse  
52  
53 464 events may be underestimated. Our review provides limited evidence on the harms of medical cannabis  
54  
55 465 beyond one year of use since most studies reported adverse events for less than one year of follow-up.

56  
57 466 We observed some inconsistency for many adverse events of interest and substantial inconsistency for all  
58  
59 467 adverse events and adverse events leading to discontinuation. We downgraded the certainty of evidence  
60  
468 when we observed important inconsistency and we did not present estimates from meta-analyses for all

1  
2  
3 469 adverse events and adverse events leading to discontinuation due to substantial inconsistency. Further,  
4  
5 470 some analyses included too few studies or participants, due to which estimates were imprecise.  
6

7  
8 471 Sixteen of 39 studies reported on herbal medical cannabis, some of which were consumed by smoking or  
9  
10 472 vaporizing, and may be associated with different adverse events (e.g. respiratory) than other formulations  
11  
12 473 of medical cannabis. We attempted to perform subgroup analyses based on the type of medical cannabis.  
13  
14 474 Results for subgroups, however, lacked credibility due to inconsistency and/or imprecision.

15  
16 475 Clinicians and patients may be more inclined to use medical cannabis or cannabinoids for pain relief if  
17  
18 476 adverse events are mild; however, the evidence on whether adverse events are transient, life threatening,  
19  
20 477 or the extent to which they impact quality of life is limited. While more than half of studies reported on  
21  
22 478 the proportion of adverse events that were serious, criteria for ascertaining severity were rarely reported.  
23  
24 479 None of the included studies reported the duration for which patients experienced adverse events.  
25  
26 480 Further, most primary studies did not report adequate details on methods for the ascertainment of  
27  
28 481 adverse events, including definitions or diagnostic criteria. The two studies that reported on withdrawal  
29  
30 482 syndrome, for example, did not provide diagnostic criteria.<sup>48 56</sup> However, the DSM-5 requires  $\geq 3$  of 7  
31  
32 483 withdrawal symptoms to be present within a week of stopping cannabis use to meet a diagnosis of  
33  
34 484 cannabis withdrawal syndrome.<sup>83</sup> It is therefore reasonable that people living with chronic pain that use  
35  
36 485 medical cannabis would be more likely to experience withdrawal symptoms vs. withdrawal syndrome.

37  
38 486 While children and youth account for approximately 15% of all chronic pain patients, we did not identify  
39  
40 487 any evidence addressing the harms of medical cannabis in this population.<sup>84</sup> As such, the extent to which  
41  
42 488 our findings are generalizable to pediatric populations is uncertain. Although there is evidence that  
43  
44 489 cannabis use during youth is associated with increased risk of acute psychotic disorders, particularly acute  
45  
46 490 psychosis,<sup>85</sup> such studies have explored use of recreational cannabis that contains greater amounts of THC  
47  
48 491 than is typically seen in medical preparations. Further, the population of patients with chronic pain on  
49  
50 492 which the studies report may not be representative of all patients with chronic pain—particularly rare  
51  
52 493 conditions that cause chronic pain.

53  
54 494 We used the DerSimonian and Laird method for meta-analysis.<sup>26</sup> A growing body of evidence, however,  
55  
56 495 suggests that this model has important limitations that may be addressed by alternative models<sup>86</sup>—  
57  
58 496 though there is limited evidence on the performance of these models for meta-analyses of proportions  
59  
60 497 and prevalence.

1  
2  
3 498 Finally, we excluded studies from meta-analyses when they did not explicitly report the adverse events of  
4  
5 499 interest to our panel members. This may have overestimated the prevalence of adverse events if the  
6  
7 500 adverse events of interest were not observed in the studies in which they were not reported. This was,  
8  
9 501 however, not possible to confirm because methods for the collection and reporting of adverse event data  
10  
11 502 across studies were variable (e.g., active monitoring vs. passive surveillance; collecting data on specific  
12  
13 503 adverse events vs. all adverse events) and poorly described in study reports.

#### 14 504 **Implications**

15  
16 505 Our systematic review and meta-analysis shows that evidence regarding long-term and serious harms of  
17  
18 506 medical cannabis or cannabinoids is insufficient—an issue with important implications for patients and  
19  
20 507 clinicians considering this management option for chronic pain. While the evidence suggests that adverse  
21  
22 508 events are common in patients using medical cannabis for chronic pain, serious adverse events appear  
23  
24 509 uncommon, which suggests that the potential benefits of medical cannabis or cannabinoids (although  
25  
26 510 very modest) may outweigh potential harms for some patients.<sup>11 18</sup>

27  
28 511 Clinicians and patients considering medical cannabis should be aware that more adverse events were  
29  
30 512 reported among studies with longer follow-up, necessitating long term follow-up of patients and re-  
31  
32 513 evaluation of pain treatment options. Our findings also have implications for the choice of medical  
33  
34 514 cannabis. We found PEA, for example, to consistently be associated with few or no adverse events across  
35  
36 515 studies, though the evidence on the efficacy of PEA is limited.<sup>11</sup>

37  
38 516 We found very limited evidence comparing medical cannabis or cannabinoids with other pain  
39  
40 517 management options. Other pharmacological treatments for chronic pain, such as gabapentinoids,  
41  
42 518 antidepressants, and opioids, may be associated with more (and more serious) adverse events.<sup>87-89</sup> To  
43  
44 519 guide patients' and clinicians' decisions on medical cannabis for chronic pain, future research should  
45  
46 520 compare the harms of medical cannabis and cannabinoids with other pain management options, including  
47  
48 521 opioids, ideally beyond one year of use, and adjust results for confounders. Comparative studies may be  
49  
50 522 synthesized by way of network meta-analysis, which would allow indirect comparisons across  
51  
52 523 formulations of medical cannabis. Future research could also explore whether the harms of medical  
53  
54 524 cannabis vary depending on the type of chronic pain.

55  
56 525 Our review highlights the need for standardization of reporting of adverse events in non-randomized  
57  
58 526 studies since such studies represent a critical source of data on long-term and infrequently occurring

1  
2  
3 527 harms. To enhance the interpretability of adverse event data, future studies should also report the  
4  
5 528 duration and severity of adverse events, since these factors are important to patients' decisions.  
6

7  
8 529 A valuable output of our systematic review is an open-source database of over 500 unique adverse events  
9  
10 530 reported to date in non-randomized studies of medical cannabis or cannabinoids for chronic pain with  
11  
12 531 corresponding assessments of risk of bias. This database was compiled in duplicate by trained and  
13  
14 532 calibrated data extractors and is freely available to those interested in further analyzing the prevalence of  
15  
16 533 different types of adverse events or to those interested in expanding the database to include adverse  
17  
18 534 events in patients using medical cannabis or cannabinoids for other indications.

### 19 535 **Conclusion**

20  
21 536 Our systematic review and meta-analysis found very low certainty evidence that suggests ~~that~~ adverse  
22  
23 537 events are common among people living with chronic pain using medical cannabis or cannabinoids, but  
24  
25 538 that serious adverse events, adverse events causing discontinuation, cognitive adverse events, motor  
26  
27 539 vehicle accidents, falls, and dependence and withdrawal syndrome are uncommon. We also found very  
28  
29 540 low certainty evidence that longer duration of use was associated more adverse events and that PEA,  
30  
31 541 compared with other types of medical cannabis, may result in few or no adverse events. Future research  
32  
33 542 should compare the risks of adverse events of medical cannabis and cannabinoids with alternative pain  
34  
35 543 management options, including opioids, and adjust for potential confounders.  
36  
37  
38  
39  
40  
41  
42  
43  
44  
45  
46  
47  
48  
49  
50  
51  
52  
53  
54  
55  
56  
57  
58  
59  
60

544

545 Tables

**Table 1: Study characteristics**

| Study                           | Design           | Country                                      | Condition                                                                      | Cannabis/<br>comparator | Dose                                                                                                                                                           | # of<br>participants | Duration of<br>cannabis use<br>(weeks)              |
|---------------------------------|------------------|----------------------------------------------|--------------------------------------------------------------------------------|-------------------------|----------------------------------------------------------------------------------------------------------------------------------------------------------------|----------------------|-----------------------------------------------------|
| Ware, 2003 <sup>35</sup>        | cross-sectional* | Canada                                       | mixed non-cancer pain                                                          | mixed herbal            | frequency: rarely (n=9), weekly (n=8), daily (n=5), >once daily (n=7)<br>dose: 1-2 puffs (n=4), 3-4 puffs (n=13), whole joint (n=8), more than one joint (n=4) | 32                   | NR                                                  |
| Lynch, 2006 <sup>36</sup>       | longitudinal*    | Canada                                       | mixed non-cancer pain                                                          | mixed herbal            | mean: 2.5 g/day                                                                                                                                                | 30                   | mean: 94.4                                          |
| Rog, 2007 <sup>37</sup>         | longitudinal*    | UK                                           | multiple sclerosis                                                             | nabiximols              | mean: 7.5 sprays/day                                                                                                                                           | 63                   | 66.1                                                |
| Weber, 2009 <sup>38</sup>       | longitudinal*†   | Germany                                      | mixed non-cancer pain                                                          | dronabinol              | median: 7.5 mg/day                                                                                                                                             | 172                  | mean: 31                                            |
| Bestard, 2011 <sup>39</sup>     | longitudinal*    | Canada                                       | peripheral neuropathic pain                                                    | nabilone                | mean: 3.0 mg/day                                                                                                                                               | 104                  | 24                                                  |
|                                 |                  |                                              |                                                                                | gabapentin              | mean: 2.3 g/day                                                                                                                                                | 107                  |                                                     |
| Fiz, 2011 <sup>40</sup>         | cross-sectional* | Spain                                        | fibromyalgia                                                                   | mixed herbal            | ~1 to 2 cigarettes or spoonful<br>daily (n=12) once every 2 to 4 days (n=5), less than twice a week (n=3), or occasionally (n=8)                               | 28                   | <52 (n=11), 52 to 156 (n=9), >156 weeks (n=8)       |
| Dominguez, 2012 <sup>41</sup>   | longitudinal*    | Spain                                        | lumbosciatica                                                                  | PEA                     | 300 mg bid                                                                                                                                                     | 64                   | 4                                                   |
| Gatti, 2012 <sup>42</sup>       | longitudinal††   | Italy                                        | mixed cancer and non-cancer pain                                               | PEA                     | 600 mg bid three weeks; 600 mg/day for four weeks                                                                                                              | 564                  | 7                                                   |
| Toth, 2012 <sup>43</sup>        | longitudinal*†   | Canada                                       | diabetic peripheral neuropathy                                                 | nabilone                | mean: 2.85 mg/day                                                                                                                                              | 37                   | 4                                                   |
| Schifilliti, 2014 <sup>44</sup> | longitudinal††   | Italy                                        | diabetic neuropathy                                                            | PEA                     | 300 mg bid                                                                                                                                                     | 30                   | 8.6                                                 |
| Storr, 2014 <sup>45</sup>       | cross-sectional* | Canada                                       | Crohn's disease (n=42), ulcerative colitis (n=10), indeterminate colitis (n=4) | mixed herbal            | NR                                                                                                                                                             | 56                   | <4 (n=3), 4 to 24 (n=9), 24 to 52 (n=5), >52 (n=32) |
| Del Giorno, 2015 <sup>46</sup>  | longitudinal††   | Italy                                        | fibromyalgia                                                                   | PEA                     | 600 mg bid first month; 300 mg bid in the next 2 months                                                                                                        | 35                   | 12                                                  |
| Hoggart, 2015 <sup>47</sup>     | longitudinal††   | UK, Czech Republic, Romania, Belgium, Canada | diabetic neuropathy                                                            | nabiximols              | median: 6 to 8 sprays/day                                                                                                                                      | 380                  | median: 35.6                                        |
| Ware, 2015 <sup>48</sup>        | longitudinal*†   | Canada                                       | mixed non-cancer pain                                                          | mixed herbal            | median: 2.5 g/day                                                                                                                                              | 215                  | 52                                                  |



|    |                                             |                   |                  |                                             |                 |                                                                                                                                                  |      |                      |
|----|---------------------------------------------|-------------------|------------------|---------------------------------------------|-----------------|--------------------------------------------------------------------------------------------------------------------------------------------------|------|----------------------|
| 1  |                                             |                   |                  |                                             | standard care   |                                                                                                                                                  | 216  |                      |
| 2  |                                             |                   |                  |                                             |                 |                                                                                                                                                  |      |                      |
| 3  |                                             |                   |                  |                                             |                 |                                                                                                                                                  |      |                      |
| 4  |                                             |                   |                  |                                             |                 |                                                                                                                                                  |      |                      |
| 5  | <b>Haroutounian, 2016</b> <sup>49</sup>     | longitudinal*     | Israel           | mixed cancer and non-cancer pain            | mixed herbal    | mean: 43.2 g/month                                                                                                                               | 206  | 30                   |
| 6  |                                             | longitudinal*     |                  |                                             |                 | Capsule: 10 mg /8 to 10 hours                                                                                                                    |      |                      |
| 7  |                                             |                   |                  |                                             |                 |                                                                                                                                                  |      |                      |
| 8  | <b>Bellnier, 2017</b> <sup>50</sup>         |                   | US               | mixed cancer and non-cancer pain            | mixed herbal    | Vapor pen inhaler for breakthrough pain: 2 mg THC, 0.1 mg CBD; 1 to 5 puffs every 15 minutes until pain relief; could be used every 4 to 6 hours | 29   | 12                   |
| 9  |                                             |                   |                  |                                             |                 |                                                                                                                                                  |      |                      |
| 10 |                                             |                   |                  |                                             |                 |                                                                                                                                                  |      |                      |
| 11 |                                             | cross-sectional*  |                  |                                             |                 |                                                                                                                                                  |      |                      |
| 12 | <b>Cranford, 2017</b> <sup>51</sup>         |                   | US               | mixed non-cancer pain                       | NR              | 0 (n=69), <1/8 oz/week (n=130), 1/8 to 1/4 oz/week (n=156), 1/4 to 1/2 oz/week (n=179), 1/2 to 1 oz/week (n=122), 1 or more oz/week (n=115)      | 775  | NR                   |
| 13 |                                             |                   |                  |                                             |                 |                                                                                                                                                  |      |                      |
| 14 |                                             |                   |                  |                                             |                 |                                                                                                                                                  |      |                      |
| 15 | <b>Fanelli, 2017</b> <sup>52</sup>          | longitudinal††    | Italy            | mixed cancer and non-cancer pain            | mixed herbal    | mean: 69.5 mg/day bediol; 67.0 mg/day bedrocan                                                                                                   | 341  | mean: 14.01          |
| 16 | <b>Feingold, 2017</b> <sup>53</sup>         | cross-sectional*  | Israel           | mixed cancer and non-cancer pain            | mixed herbal    | NR                                                                                                                                               | 406  | NR                   |
| 17 |                                             |                   |                  |                                             |                 |                                                                                                                                                  |      |                      |
| 18 | <b>Paladini, 2017</b> <sup>54</sup>         | longitudinal††    | Italy            | failed back surgery syndrome                | PEA             | 600 mg bid for one month; 600 mg/day for one month                                                                                               | 35   | 8                    |
| 19 | <b>Passavanti, 2017</b> <sup>55</sup>       | longitudinal††    | Italy            | lower back pain                             | PEA             | 600 mg bid                                                                                                                                       | 30   | 24                   |
| 20 | <b>Schimrigk, 2017</b> <sup>56</sup>        | longitudinal*†    | Germany, Austria | multiple sclerosis                          | dronabinol      | range: 7.5 to 15 mg/day                                                                                                                          | 209  | 32                   |
| 21 | <b>Chirchiglia, 2018</b> <sup>57</sup>      | longitudinal††    | Italy            | lower back pain                             | PEA             | 1.2 g/day                                                                                                                                        | 100  | 4                    |
| 22 | <b>Crowley, 2018</b> <sup>58</sup>          | longitudinal*     | US               | mixed non-cancer pain                       | Trokie lozenges | NR                                                                                                                                               | 35   | 4 to 60              |
| 23 | <b>Habib, 2018</b> <sup>59</sup>            | longitudinal*     | Israel           | fibromyalgia                                | mixed herbal    | mean: 26 g/month                                                                                                                                 | 26   | mean: 41.6           |
| 24 | <b>Anderson, 2019</b> <sup>60</sup>         | longitudinal*     | US               | cancer pain                                 | mixed herbal    | NR                                                                                                                                               | 1120 | 16                   |
| 25 |                                             |                   |                  |                                             |                 |                                                                                                                                                  |      |                      |
| 26 |                                             |                   |                  |                                             |                 |                                                                                                                                                  |      |                      |
| 27 |                                             | cross-sectional†† |                  |                                             |                 |                                                                                                                                                  |      |                      |
| 28 | <b>Bonar, 2019</b> <sup>61</sup>            |                   | US               | mixed non-cancer pain                       | NR              | 0 (n=95), <1/8 oz/week (n=126), 1/8 to 1/4 oz/week (n=158), 1/4 to 1/2 oz/week (n=174), 1/2 to 1 oz/week (n=119), 1 or more oz/week (n=119)      | 790  | NR                   |
| 29 |                                             |                   |                  |                                             |                 |                                                                                                                                                  |      |                      |
| 30 |                                             |                   |                  |                                             |                 |                                                                                                                                                  |      |                      |
| 31 | <b>Cervigni, 2019</b> <sup>62</sup>         | longitudinal†     | Italy            | interstitial cystitis/bladder pain syndrome | PEA             | 400 mg m-PEA plus 40 mg polydatin bid for 3 months, od for 3 months                                                                              | 32   | 24                   |
| 32 | <b>Cremer-Schaeffer, 2019</b> <sup>63</sup> | longitudinal††    | Germany          | mixed cancer and non-cancer pain            | dronabinol      | NR                                                                                                                                               | 2017 | 52                   |
| 33 |                                             |                   |                  |                                             |                 |                                                                                                                                                  |      |                      |
| 34 |                                             |                   |                  |                                             | mixed herbal    | NR                                                                                                                                               | 656  |                      |
| 35 |                                             |                   |                  |                                             | nabiximols      | NR                                                                                                                                               | 393  |                      |
| 36 |                                             |                   |                  |                                             |                 |                                                                                                                                                  |      |                      |
| 37 | <b>Lejczak, 2019</b> <sup>64</sup>          | longitudinal†     | France           | mixed cancer and non-cancer pain            | dronabinol      | range: 2.5 to 30 mg/day                                                                                                                          | 148  | range: 4 to 24 weeks |
| 38 | <b>Loi, 2019</b> <sup>65</sup>              | longitudinal*     | Italy            | endometriosis                               | PEA             | 600 mg/bid for 10 days; 400 mg m-PEA plus 40 mg polydatin bid                                                                                    | 28   | 12.9                 |
| 39 |                                             |                   |                  |                                             |                 |                                                                                                                                                  |      |                      |
| 40 |                                             |                   |                  |                                             |                 |                                                                                                                                                  |      |                      |
| 41 |                                             |                   |                  |                                             |                 |                                                                                                                                                  |      |                      |
| 42 |                                             |                   |                  |                                             |                 |                                                                                                                                                  |      |                      |
| 43 |                                             |                   |                  |                                             |                 |                                                                                                                                                  |      |                      |
| 44 |                                             |                   |                  |                                             |                 |                                                                                                                                                  |      |                      |
| 45 |                                             |                   |                  |                                             |                 |                                                                                                                                                  |      |                      |
| 46 |                                             |                   |                  |                                             |                 |                                                                                                                                                  |      |                      |
| 47 |                                             |                   |                  |                                             |                 |                                                                                                                                                  |      |                      |

|    |                                     |                  |           |                                                                                                                                                                                                                                                                                                                                                    |              |                                                                                                                              |            |
|----|-------------------------------------|------------------|-----------|----------------------------------------------------------------------------------------------------------------------------------------------------------------------------------------------------------------------------------------------------------------------------------------------------------------------------------------------------|--------------|------------------------------------------------------------------------------------------------------------------------------|------------|
| 1  |                                     |                  |           |                                                                                                                                                                                                                                                                                                                                                    |              |                                                                                                                              |            |
| 2  |                                     |                  |           |                                                                                                                                                                                                                                                                                                                                                    |              |                                                                                                                              |            |
| 3  |                                     |                  |           |                                                                                                                                                                                                                                                                                                                                                    |              |                                                                                                                              |            |
| 4  | <b>Naftali, 2019</b> <sup>66</sup>  | longitudinal*    | Israel    | inflammatory bowel disease                                                                                                                                                                                                                                                                                                                         | mixed herbal | mean: 31 g/month                                                                                                             |            |
| 5  |                                     |                  |           |                                                                                                                                                                                                                                                                                                                                                    |              |                                                                                                                              | 127        |
| 6  | <b>Perron, 2019</b> <sup>67</sup>   | cross-sectional* | US        | mixed non-cancer pain                                                                                                                                                                                                                                                                                                                              | NR           | mean: 21 g/day THC; 170 g/day CBD                                                                                            | 618        |
| 7  |                                     |                  |           |                                                                                                                                                                                                                                                                                                                                                    |              |                                                                                                                              | ≥12        |
| 8  | <b>Sagy, 2019</b> <sup>68</sup>     | longitudinal††   | Israel    | mixed cancer and non-cancer pain                                                                                                                                                                                                                                                                                                                   | mixed herbal | median: 1000 mg/day cannabis                                                                                                 | 239        |
| 9  |                                     |                  |           |                                                                                                                                                                                                                                                                                                                                                    |              |                                                                                                                              | 24         |
| 10 | <b>Sinclair, 2019</b> <sup>69</sup> | cross-sectional* | Australia | endometriosis                                                                                                                                                                                                                                                                                                                                      | mixed herbal | median: 140 mg/day THC; 39 mg/day CBD                                                                                        | 48         |
| 11 |                                     |                  |           |                                                                                                                                                                                                                                                                                                                                                    |              | less than once per week (n=12), once per week (n=6), two to six times per week (n=9), daily or multiple times per day (n=21) | NR         |
| 12 |                                     | longitudinal*    |           |                                                                                                                                                                                                                                                                                                                                                    |              |                                                                                                                              |            |
| 13 |                                     |                  |           | low back pain (n=234), failed back surgery syndrome (n=148), shoulder/neck pain (n=91), post-herpetic neuralgia (n=72), peripheral diabetic neuropathy (n=56), brachial plexus injury (n=48), lumbar spinal stenosis (n=38), cancer (n=31), fibromyalgia (n=26), peripheral/focal nerve lesions (n=22), phantom pain (n=19), osteoarthritis (n=15) |              |                                                                                                                              |            |
| 14 | <b>Ueberall, 2019</b> <sup>70</sup> |                  | Germany   |                                                                                                                                                                                                                                                                                                                                                    | nabiximols   | mean: 7.1 sprays/day                                                                                                         | 800        |
| 15 |                                     |                  |           |                                                                                                                                                                                                                                                                                                                                                    |              |                                                                                                                              | 12         |
| 16 |                                     |                  |           |                                                                                                                                                                                                                                                                                                                                                    |              |                                                                                                                              |            |
| 17 |                                     |                  |           |                                                                                                                                                                                                                                                                                                                                                    |              |                                                                                                                              |            |
| 18 |                                     |                  |           |                                                                                                                                                                                                                                                                                                                                                    |              |                                                                                                                              |            |
| 19 |                                     |                  |           |                                                                                                                                                                                                                                                                                                                                                    |              |                                                                                                                              |            |
| 20 |                                     |                  |           |                                                                                                                                                                                                                                                                                                                                                    |              |                                                                                                                              |            |
| 21 |                                     |                  |           |                                                                                                                                                                                                                                                                                                                                                    |              |                                                                                                                              |            |
| 22 |                                     |                  |           |                                                                                                                                                                                                                                                                                                                                                    |              |                                                                                                                              |            |
| 23 | <b>Vigil, 2017</b> <sup>71</sup>    | longitudinal*    | US        | mixed non-cancer pain                                                                                                                                                                                                                                                                                                                              | NR           | NR                                                                                                                           | 37         |
| 24 |                                     |                  |           |                                                                                                                                                                                                                                                                                                                                                    |              |                                                                                                                              | mean: 82.4 |
| 25 | <b>Yassin, 2019</b> <sup>72</sup>   | longitudinal††   | Israel    | fibromyalgia                                                                                                                                                                                                                                                                                                                                       | mixed herbal | 20 to 30 g/month                                                                                                             | 31         |
| 26 |                                     |                  |           |                                                                                                                                                                                                                                                                                                                                                    |              |                                                                                                                              | 24         |
| 27 | <b>Giorgi, 2020</b> <sup>73</sup>   | longitudinal††   | Italy     | fibromyalgia                                                                                                                                                                                                                                                                                                                                       | extracts     | 10 to 30 drops/day; no more than 120 drops/day                                                                               | 102        |
| 28 |                                     |                  |           |                                                                                                                                                                                                                                                                                                                                                    |              |                                                                                                                              | 24         |

NR=not reported  
 \*Patient-report  
 †Clinician-report  
 ††NR

546

547

548

**Table 2: Prevalence of adverse events from non-comparative studies**

| Outcome                                       | Number of studies | Number of participants | Duration of follow-up (weeks)         | Prevalence % (95% CI)                                                                                                                                                                                                                                                                                                                               | I <sup>2</sup> (τ <sup>2</sup> ) | Certainty | Reasons for downgrading                             |
|-----------------------------------------------|-------------------|------------------------|---------------------------------------|-----------------------------------------------------------------------------------------------------------------------------------------------------------------------------------------------------------------------------------------------------------------------------------------------------------------------------------------------------|----------------------------------|-----------|-----------------------------------------------------|
| <b>All adverse events</b>                     | 22                | 4,108                  | 4 to 94                               | The prevalence of adverse events ranged between 0% to 92.1%. Studies with less than 24 weeks of cannabis use typically reported fewer adverse events than those with more than 24 weeks. Patients using PEA experienced no adverse events. The evidence was overall very uncertain due to risk of bias and inconsistency.                           |                                  | very low  | risk of bias (3 levels), inconsistency              |
| <b>Adverse events causing discontinuation</b> | 20                | 6,509                  | 4 to 66                               | The prevalence of discontinuations due to adverse events ranged between 0% to 27.0%. Studies with less than 24 weeks of cannabis use typically reported fewer discontinuations than those with more than 24 weeks. Patients using PEA experienced no adverse events. The evidence was overall very uncertain due to risk of bias and inconsistency. |                                  | very low  | risk of bias (3 levels), inconsistency              |
| <b>Serious adverse events</b>                 | 24                | 4,273                  | 4 to 94                               | 1.2 (0.1 to 3.1)                                                                                                                                                                                                                                                                                                                                    | 91 (0.01273)                     | very low  | risk of bias (3 levels)                             |
| <b>Psychiatric adverse events</b>             |                   |                        |                                       |                                                                                                                                                                                                                                                                                                                                                     |                                  |           |                                                     |
| Psychiatric disorder                          | 4                 | 1,458                  | 12 to 66                              | 13.5 (2.6 to 30.6)                                                                                                                                                                                                                                                                                                                                  | 98 (0.0436)                      | very low  | risk of bias (3 levels), inconsistency, imprecision |
| Suicide                                       | 1                 | 215                    | 52                                    | 0 (0 to 0.8)                                                                                                                                                                                                                                                                                                                                        | NA                               | very low  | risk of bias (3 levels)                             |
| Suicidal thoughts                             | 1                 | 3,066                  | 52                                    | 0.1 (0 to 0.5)                                                                                                                                                                                                                                                                                                                                      | 44 (0.0003)                      | very low  | risk of bias (3 levels)                             |
| Depression                                    | 6                 | 4,144                  | 12 to 66                              | 1.7 (0.9 to 2.7)                                                                                                                                                                                                                                                                                                                                    | 71 (0.0011)                      | very low  | risk of bias (3 levels)                             |
| Mania                                         | 1                 | 215                    | 52                                    | 0.5 (0 to 2)                                                                                                                                                                                                                                                                                                                                        | NA                               | very low  | risk of bias (3 levels)                             |
| Hallucinations                                | 6                 | 3,583                  | 24 to 66                              | 0.5 (0.1 to 1.3)                                                                                                                                                                                                                                                                                                                                    | 69 (0.0012)                      | very low  | risk of bias (3 levels)                             |
| Delusions                                     | 4                 | 3,281                  | 52                                    | 0.4 (0.2 to 0.6)                                                                                                                                                                                                                                                                                                                                    | 0 (0)                            | very low  | risk of bias (3 levels)                             |
| Paranoia                                      | 3                 | 277                    | 52 to 94; one cross-sectional study   | 5.6 (0 to 19.2)                                                                                                                                                                                                                                                                                                                                     | 85 (0.0266)                      | very low  | risk of bias (3 levels), inconsistency, imprecision |
| Anxiety                                       | 5                 | 1,695                  | 12 to 94; two cross-sectional studies | 7.4 (0 to 26.9)                                                                                                                                                                                                                                                                                                                                     | 99 (0.0859)                      | very low  | risk of bias (3 levels), imprecision                |
| Euphoria                                      | 7                 | 4,501                  | 4 to 66                               | 2.1 (0.9 to 3.8)                                                                                                                                                                                                                                                                                                                                    | 96 (0.0028)                      | very low  | risk of bias (3 levels)                             |
| <b>Cognitive adverse events</b>               |                   |                        |                                       |                                                                                                                                                                                                                                                                                                                                                     |                                  |           |                                                     |

|                                  |   |       |                               |                     |                |          |                                                                   |
|----------------------------------|---|-------|-------------------------------|---------------------|----------------|----------|-------------------------------------------------------------------|
| Memory impairment                | 6 | 4,484 | 4 to 176                      | 5.3 (2.1 to 9.6)    | 96<br>(0.0126) | very low | risk of bias (3 levels)                                           |
| Confusion                        | 7 | 1,654 | 4 to 176                      | 1.8 (0.3 to 4.2)    | 81<br>(0.0056) | very low | risk of bias (3 levels)                                           |
| Disorientation                   | 6 | 4,485 | 12 to 52                      | 1.6 (0.6 to 3.0)    | 88<br>(0.0028) | very low | risk of bias (3 levels)                                           |
| Attention disorder or deficit    | 8 | 5,477 | 12 to 82                      | 3.4 (1.3 to 6.3)    | 95<br>(0.0082) | very low | risk of bias (3 levels)                                           |
| <b>Accidents and injuries</b>    |   |       |                               |                     |                |          |                                                                   |
| Falls                            | 1 | 215   | 52                            | 2.3 (0.7 to 4.9)    | NA             | very low | risk of bias (3 levels)                                           |
| Motor vehicle accidents          | 1 | 215   | 52                            | 0.5 (0 to 2.0)      | NA             | very low | risk of bias (3 levels)                                           |
| <b>Dependence and withdrawal</b> |   |       |                               |                     |                |          |                                                                   |
| Dependence                       | 3 | 1,824 | 12; one cross-sectional study | 4.4 (0.0 to 19.9)   | 99<br>(0.0488) | very low | risk of bias (3 levels), inconsistency, imprecision, indirectness |
| Withdrawal syndrome              | 2 | 424   | 32 to 52                      | 2.1 (0 to 8.2)      | 89<br>(0.0091) | very low | risk of bias (3 levels), indirectness                             |
| Withdrawal symptoms              | 1 | 618   | NA; cross-sectional           | 67.8 (64.1 to 71.4) | NA             | very low | risk of bias (3 levels), indirectness                             |

Table 3: Risk differences for adverse events from comparative studies

| Outcome                                | Exposure                          | Number of studies | Number of participants | Follow-up (weeks) | Risk with cannabis (/1000) | Risk with comparator (/1000) | Risk difference (95% CI) | Certainty | Reasons for downgrading              |
|----------------------------------------|-----------------------------------|-------------------|------------------------|-------------------|----------------------------|------------------------------|--------------------------|-----------|--------------------------------------|
| All adverse events                     | Nabilone vs. gabapentin           | 1                 | 220                    | 24                | 404                        | 534                          | -13.1% (-26.2 to 0)      | Very low  | Risk of bias (2 levels), imprecision |
| Adverse events causing discontinuation | Herbal cannabis vs. standard care | 1                 | 431                    | 52                | 47                         | 0                            | 4.7% (1.8 to 7.5)        | Low       | Risk of bias (2 levels),             |
|                                        | Nabilone vs. gabapentin           | 1                 | 220                    | 24                | 96                         | 190                          | -9.4% (-18.5 to -0.2)    | Very low  | Risk of bias (2 levels), imprecision |
| Serious                                | Herbal cannabis vs. standard care | 1                 | 431                    | 52                | 130                        | 194                          | 1.5% (-8.3 to 20.2) *    | Low       | Risk of bias, imprecision            |
|                                        | Nabilone vs. gabapentin           | 1                 | 220                    | 24                | 0                          | 0                            | 0% (0 to 0)              | Very low  | Risk of bias (2 levels), imprecision |
| Psychiatric disorder                   | Herbal cannabis vs. standard care | 1                 | 431                    | 52                | 219                        | 97                           | 16.9% (5.8 to 40.5) †    | Very low  | Risk of bias (2 levels), imprecision |
| Suicide                                | Herbal cannabis vs. standard care | 1                 | 431                    | 52                | 0                          | 5                            | -0.5% (-1.4 to 0.4)      | Low       | Risk of bias (2 levels)              |
| Mania                                  | Herbal cannabis vs. standard care | 1                 | 431                    | 52                | 5                          | 0                            | 0.5% (-0.4 to 1.4)       | Low       | Risk of bias (2 levels)              |
| Hallucinations                         | Herbal cannabis vs. standard care | 1                 | 431                    | 52                | 5                          | 0                            | 0.5% (-0.4 to 1.4)       | Low       | Risk of bias (2 levels)              |
| Delusions                              | Herbal cannabis vs. standard care | 1                 | 431                    | 52                | 0                          | 5                            | -0.5% (-1.4 to 0.4)      | Low       | Risk of bias (2 levels)              |
| Depression                             | Herbal cannabis vs. standard care | 1                 | 431                    | 52                | 47                         | 46                           | 0.1% (-4 to 4)           | Low       | Risk of bias (2 levels)              |
| Paranoia                               | Herbal cannabis vs. standard care | 1                 | 431                    | 52                | 9                          | 0                            | 0.9% (-0.4 to 2.2)       | Low       | Risk of bias (2 levels)              |
| Anxiety                                | Herbal cannabis vs. standard care | 1                 | 431                    | 52                | 47                         | 9                            | 3.8% (0.6 to 6.8)        | Low       | Risk of bias (2 levels)              |
| Euphoria                               | Herbal cannabis vs. standard care | 1                 | 431                    | 52                | 42                         | 0                            | 4.2% (1.5 to 6.9)        | Low       | Risk of bias (2 levels)              |

1  
2  
3  
4  
5  
6  
7  
8  
9  
10  
11  
12  
13  
14  
15  
16  
17  
18  
19  
20  
21  
22  
23  
24  
25  
26  
27  
28  
29  
30  
31  
32  
33  
34  
35  
36  
37  
38  
39  
40  
41  
42  
43  
44  
45  
46  
47

For peer review only

|                                 |                                   |   |     |    |    |    |                     |          |                          |
|---------------------------------|-----------------------------------|---|-----|----|----|----|---------------------|----------|--------------------------|
| <b>Memory impairment</b>        | Herbal cannabis vs. standard care | 1 | 431 | 52 | 19 | 0  | 1.9% (0.1 to 3.7)   | Low      | Risk of bias (2 levels)  |
| <b>Confusion</b>                | Herbal cannabis vs. standard care | 1 | 431 | 52 | 14 | 19 | -0.5% (-2.8 to 1.9) | Low      | Risk of bias (2 levels)  |
| <b>Disturbance in attention</b> | Herbal cannabis vs. standard care | 1 | 431 | 52 | 23 | 9  | 1.4% (-1 to 3.8)    | Low      | Risk of bias (2 levels)  |
| <b>Falls</b>                    | Herbal cannabis vs. standard care | 1 | 431 | 52 | 23 | 23 | 0% (-2.8 to 2.9)    | Low      | Risk of bias (2 levels)  |
| <b>Motor vehicle accidents</b>  | Herbal cannabis vs. standard care | 1 | 431 | 52 | 5  | 0  | 0.5% (-0.4 to 1.4)  | Low      | Risk of bias (2 levels)  |
| <b>Withdrawal syndrome</b>      | Herbal cannabis vs. standard care | 1 | 431 | 52 | 5  | 0  | 0.5% (-0.4 to 1.4)  | Very low | Risk of bias (2 levels), |

\* Risk difference calculated from adjusted incident rate ratio reported in study.

† Risk difference calculated from unadjusted incident rate ratio reported in study.

551 **Figures**552 **Figure 1: Study selection process**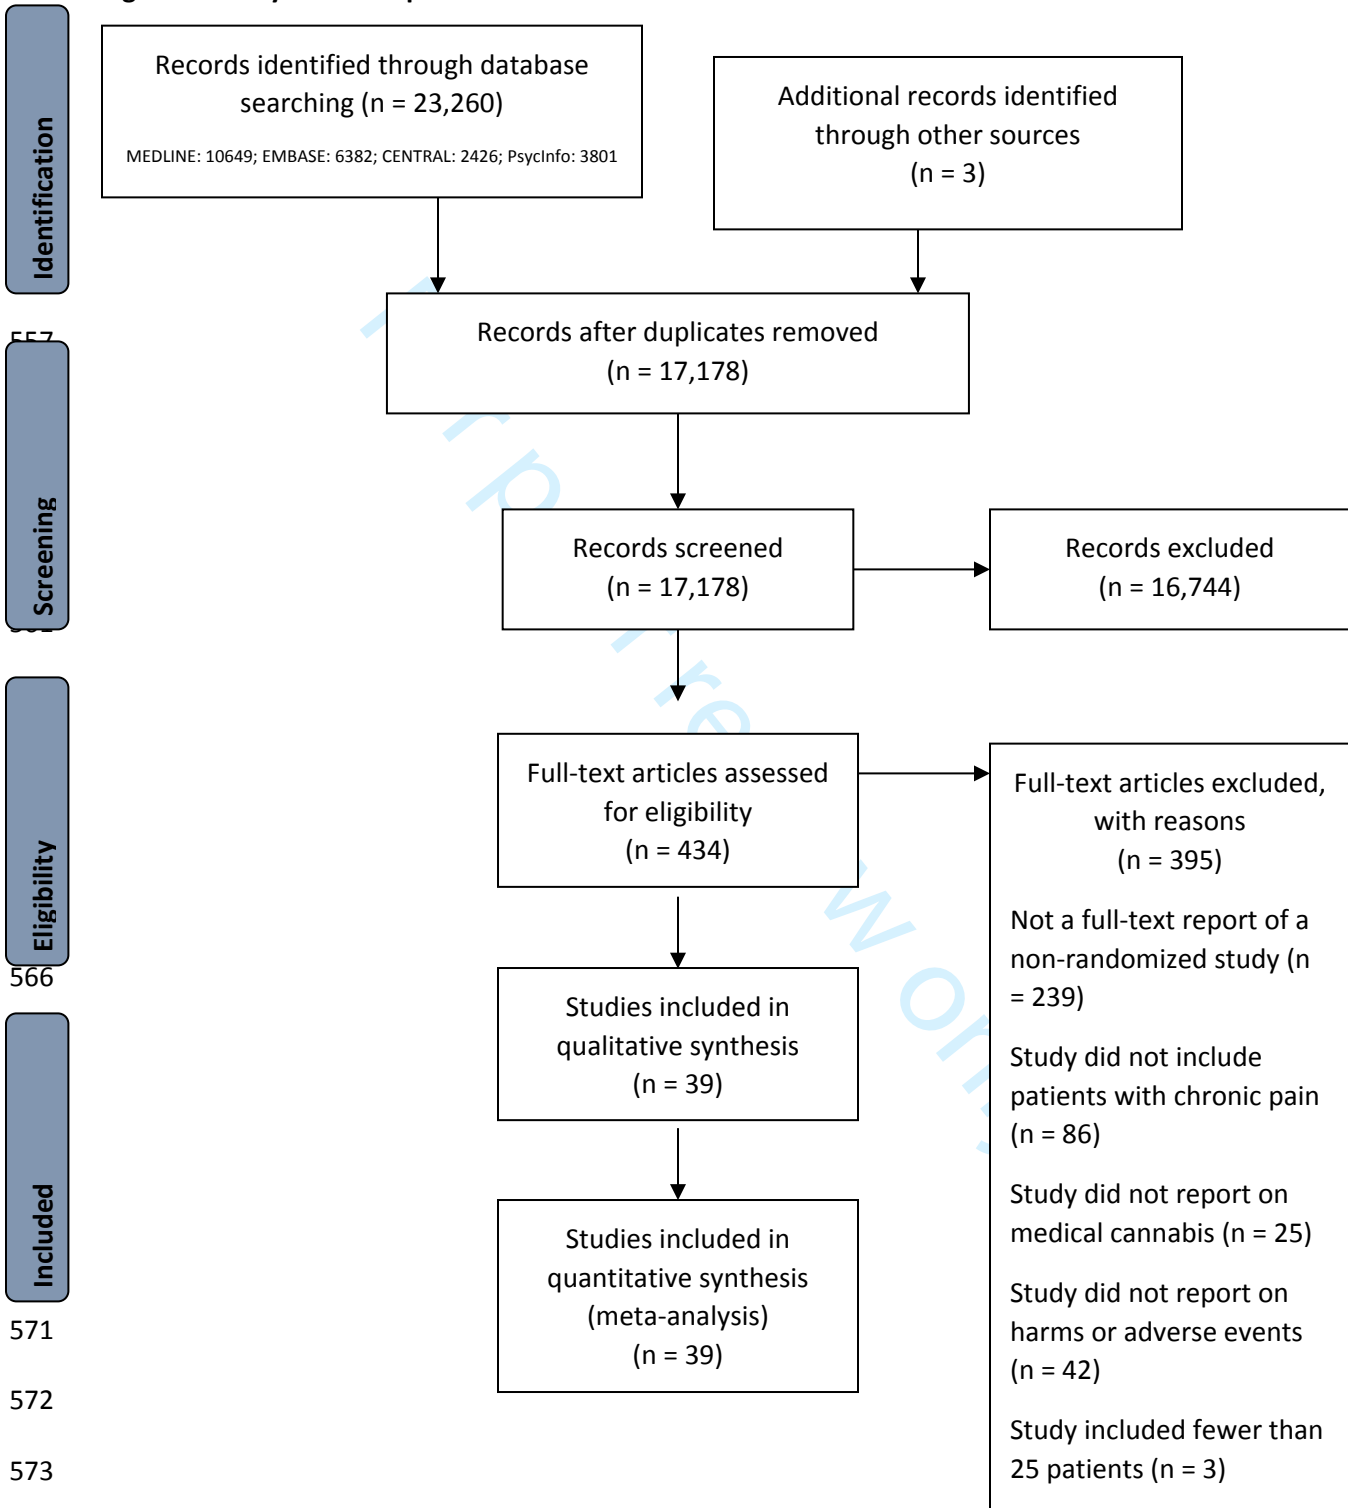

575 **Figure 2: Forest plot of the meta-analysis for all adverse events stratified by type of medical cannabis**

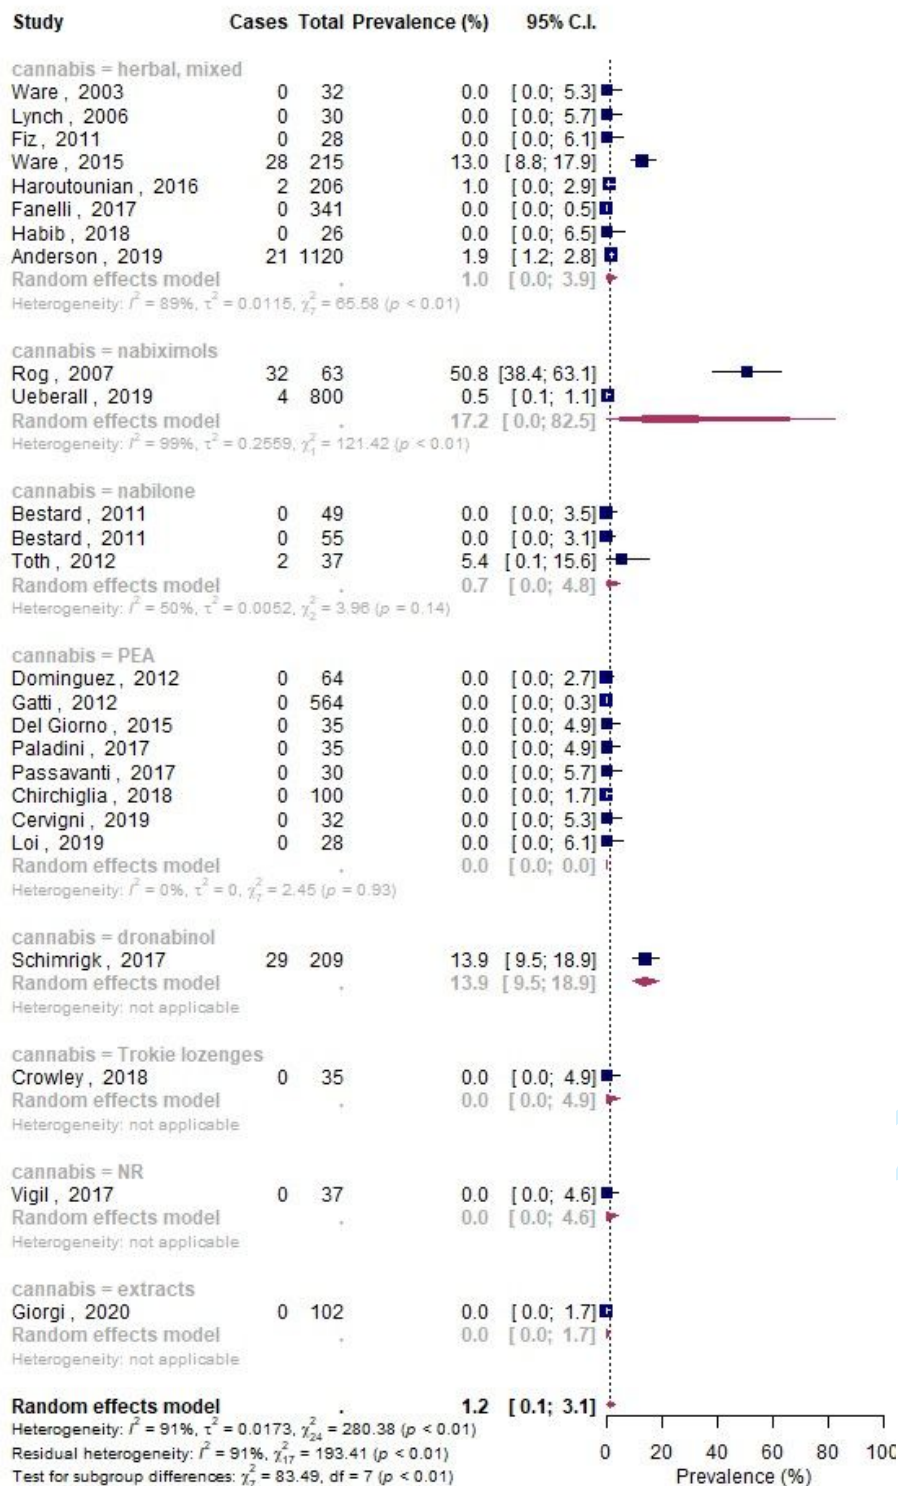

576

577

578



579 **References**

- 580 1. Mills SEE, Nicolson KP, Smith BH. Chronic pain: a review of its epidemiology and associated factors in  
581 population-based studies. *Br J Anaesth* 2019;123(2):e273-e83. doi: 10.1016/j.bja.2019.03.023  
582 [published Online First: 2019/05/14]
- 583 2. Mills SEE, van Hecke O, Smith BH. Handbook of Pain and Palliative Care: Biopsychosocial and  
584 Environmental Approaches for the Life Course. 2019.
- 585 3. Keyhani S, Steigerwald S, Ishida J, et al. Risks and Benefits of Marijuana Use: A National Survey of U.S.  
586 Adults. *Ann Intern Med* 2018;169(5):282-90. doi: 10.7326/m18-0810 [published Online First:  
587 2018/07/25]
- 588 4. Dai H, Richter KP. A National Survey of Marijuana Use Among US Adults With Medical Conditions,  
589 2016-2017. *JAMA Netw Open* 2019;2(9):e1911936. doi: 10.1001/jamanetworkopen.2019.11936  
590 [published Online First: 2019/09/21]
- 591 5. National Academies of Sciences E, Medicine, Health, et al. The National Academies Collection: Reports  
592 funded by National Institutes of Health. The Health Effects of Cannabis and Cannabinoids: The  
593 Current State of Evidence and Recommendations for Research. Washington (DC): National  
594 Academies Press (US) 2017.
- 595 6. Carr D, Schatman M. Cannabis for Chronic Pain: Not Ready for Prime Time. *American Journal of Public*  
596 *Health* 2019;109(1):50-51. doi: 10.2105/AJPH.2018.304593 [published Online First: 2019/01/]  
597 7. Ziemianski D, Capler R, Tekanoff R, et al. Cannabis in medicine: a national educational needs  
598 assessment among Canadian physicians. *BMC Med Educ* 2015;15:52. doi: 10.1186/s12909-015-  
599 0335-0 [published Online First: 2015/04/19]
- 600 8. Kahan M, Srivastava A. Is there a role for marijuana in medical practice? No. *Can Fam Physician*  
601 2007;53(1):22-5. [published Online First: 2007/09/18]
- 602 9. Ware MA. Is there a role for marijuana in medical practice? Yes. *Can Fam Physician* 2007;53(1):22-5.  
603 [published Online First: 2007/09/18]
- 604 10. Deshpande A, Mailis-Gagnon A, Zoheiry N, et al. Efficacy and adverse effects of medical marijuana  
605 for chronic noncancer pain: Systematic review of randomized controlled trials. *Can Fam*  
606 *Physician* 2015;61(8):e372-81. [published Online First: 2015/10/28]
- 607 11. Wang L, Hong P, May C, et al. Medical cannabis for chronic pain: a systematic review and meta-  
608 analysis of randomized clinical trials. *BMJ* 2020;Accepted
- 609 12. Wang T, Collet JP, Shapiro S, et al. Adverse effects of medical cannabinoids: a systematic review.  
610 *Cmaj* 2008;178(13):1669-78. doi: 10.1503/cmaj.071178 [published Online First: 2008/06/19]
- 611 13. Whiting PF, Wolff RF, Deshpande S, et al. Cannabinoids for Medical Use: A Systematic Review and  
612 Meta-analysis. *Jama* 2015;313(24):2456-73. doi: 10.1001/jama.2015.6358 [published Online  
613 First: 2015/06/24]
- 614 14. Hill KP, Hurley-Welljams-Dorof WM. Low to moderate quality evidence demonstrates the potential  
615 benefits and adverse events of cannabinoids for certain medical indications. *Evid Based Med*  
616 2016;21(1):17. doi: 10.1136/ebmed-2015-110264 [published Online First: 2015/10/23]
- 617 15. Bair MJ, Robinson RL, Katon W, et al. Depression and pain comorbidity: a literature review. *Arch*  
618 *Intern Med* 2003;163(20):2433-45. doi: 10.1001/archinte.163.20.2433 [published Online First:  
619 2003/11/12]
- 620 16. Magni G, Marchetti M, Moreschi C, et al. Chronic musculoskeletal pain and depressive symptoms in  
621 the National Health and Nutrition Examination. I. Epidemiologic follow-up study. *Pain*  
622 1993;53(2):163-8. doi: 10.1016/0304-3959(93)90076-2 [published Online First: 1993/05/01]
- 623 17. Wilson KG, Eriksson MY, D'Eon JL, et al. Major depression and insomnia in chronic pain. *Clin J Pain*  
624 2002;18(2):77-83. doi: 10.1097/00002508-200203000-00002 [published Online First:  
625 2002/03/08]

- 1  
2  
3 626 18. Busse J, Vankrunkelsven P, Zeng L, et al. Medical cannabis for chronic pain: a clinical practice  
4 627 guideline. *BMJ* 2020;Submitted.
- 5 628 19. Siemieniuk RA, Agoritsas T, Macdonald H, et al. Introduction to BMJ Rapid Recommendations. *Bmj*  
6 629 2016;354:i5191. doi: 10.1136/bmj.i5191 [published Online First: 2016/09/30]
- 7 630 20. Zeng L, Lytvyn L, Wang X, et al. Values and preferences towards medical cannabis among patients  
8 631 with chronic pain: A mixed methods systematic review. *BMJ* 2020;Submitted
- 9 632 21. Noori A, Miroshnychenko A, Shergill Y, et al. Opioid-Sparing effects of medical cannabis for chronic  
10 633 pain: A systematic review and meta-analysis of randomized and observational studies. *BMJ*  
11 634 2020;Submitted
- 12 635 22. Zorzela L, Loke YK, Ioannidis JP, et al. PRISMA harms checklist: improving harms reporting in  
13 636 systematic reviews. *Bmj* 2016;352:i157. doi: 10.1136/bmj.i157 [published Online First:  
14 637 2016/02/03]
- 15 638 23. Busse JW, Bartlett SJ, Dougados M, et al. Optimal Strategies for Reporting Pain in Clinical Trials and  
16 639 Systematic Reviews: Recommendations from an OMERACT 12 Workshop. *J Rheumatol*  
17 640 2015;42(10):1962-70. doi: 10.3899/jrheum.141440 [published Online First: 2015/05/17]
- 18 641 24. Sterne JA, Hernán MA, Reeves BC, et al. ROBINS-I: a tool for assessing risk of bias in non-randomised  
19 642 studies of interventions. *Bmj* 2016;355:i4919. doi: 10.1136/bmj.i4919 [published Online First:  
20 643 2016/10/14]
- 21 644 25. Freeman MF, Tukey JW. Transformations related to the angular and the square root. *The Annals of*  
22 645 *Mathematical Statistics* 1950:607-11.
- 23 646 26. DerSimonian R, Laird N. Meta-analysis in clinical trials. *Controlled clinical trials* 1986;7(3):177-88.
- 24 647 27. Murad M, Montori V, Ioannidis J, et al. Fixed-effects and random-effects models. *Users' guide to the*  
25 648 *medical literature A manual for evidence-based clinical practice McGraw-Hill, 3rd ed New York,*  
26 649 *America* 2015
- 27 650 28. Rücker G, Schwarzer G, Carpenter JR, et al. Undue reliance on I(2) in assessing heterogeneity may  
28 651 mislead. *BMC Med Res Methodol* 2008;8:79. doi: 10.1186/1471-2288-8-79 [published Online  
29 652 First: 2008/11/28]
- 30 653 29. Sun X, Briel M, Walter SD, et al. Is a subgroup effect believable? Updating criteria to evaluate the  
31 654 credibility of subgroup analyses. *Bmj* 2010;340:c117. doi: 10.1136/bmj.c117 [published Online  
32 655 First: 2010/04/01]
- 33 656 30. Schandelmaier S, Briel M, Varadhan R, et al. Development of the Instrument to assess the Credibility  
34 657 of Effect Modification Analyses (ICEMAN) in randomized controlled trials and meta-analyses.  
35 658 *Cmaj* 2020;192(32):E901-e06. doi: 10.1503/cmaj.200077 [published Online First: 2020/08/12]
- 36 659 31. Schwarzer G. meta: An R package for meta-analysis. *R news* 2007;7(3):40-45.
- 37 660 32. Schünemann HJ, Cuello C, Akl EA, et al. GRADE guidelines: 18. How ROBINS-I and other tools to  
38 661 assess risk of bias in nonrandomized studies should be used to rate the certainty of a body of  
39 662 evidence. *J Clin Epidemiol* 2019;111:105-14. doi: 10.1016/j.jclinepi.2018.01.012 [published  
40 663 Online First: 2018/02/13]
- 41 664 33. Guyatt GH, Oxman AD, Vist GE, et al. GRADE: an emerging consensus on rating quality of evidence  
42 665 and strength of recommendations. *Bmj* 2008;336(7650):924-6. doi:  
43 666 10.1136/bmj.39489.470347.AD [published Online First: 2008/04/26]
- 44 667 34. Santesso N, Glenton C, Dahm P, et al. GRADE guidelines 26: informative statements to communicate  
45 668 the findings of systematic reviews of interventions. *J Clin Epidemiol* 2020;119:126-35. doi:  
46 669 10.1016/j.jclinepi.2019.10.014 [published Online First: 2019/11/13]
- 47 670 35. Ware MA, Doyle CR, Woods R, et al. Cannabis use for chronic non-cancer pain: results of a  
48 671 prospective survey. *Pain* 2003;102(1-2):211-6.

- 1  
2  
3 672 36. Lynch ME, Young J, Clark AJ. A case series of patients using medicinal marihuana for management of  
4 673 chronic pain under the Canadian Marihuana Medical Access Regulations. *Journal of Pain &*  
5 674 *Symptom Management* 2006;32(5):497-501.
- 6 675 37. Rog DJ, Nurmikko TJ, Young CA. Oromucosal delta9-tetrahydrocannabinol/cannabidiol for  
7 676 neuropathic pain associated with multiple sclerosis: an uncontrolled, open-label, 2-year  
8 677 extension trial. *Clinical Therapeutics* 2007;29(9):2068-79.
- 9 678 38. Weber J, Schley M, Casutt M, et al. Tetrahydrocannabinol (Delta 9-THC) treatment in chronic central  
10 679 neuropathic pain and fibromyalgia patients: Results of a multicenter survey. *Anesthesiology*  
11 680 *Research and Practice* 2009;2009 (no pagination)(827290) doi:  
12 681 <http://dx.doi.org/10.1155/2009/827290>
- 13 682 39. Bestard JA, Toth CC. An open-label comparison of nabilone and gabapentin as adjuvant therapy or  
14 683 monotherapy in the management of neuropathic pain in patients with peripheral neuropathy.  
15 684 *Pain Practice* 2011;11(4):353-68. doi: <https://dx.doi.org/10.1111/j.1533-2500.2010.00427.x>
- 16 685 40. Fiz J, Duran M, Capella D, et al. Cannabis use in patients with Fibromyalgia: Effect on symptoms relief  
17 686 and health-related quality of life. *PLoS ONE* 2011;6 (4) (no pagination)(e18440) doi:  
18 687 <http://dx.doi.org/10.1371/journal.pone.0018440>
- 19 688 41. Domínguez CM, Martín AD, Ferrer FG, et al. N-palmitoylethanolamide in the treatment of  
20 689 neuropathic pain associated with lumbosciatica. *Pain Manag* 2012;2(2):119-24. doi:  
21 690 10.2217/pmt.12.5 [published Online First: 2012/03/01]
- 22 691 42. Gatti A, Lazzari M, Gianfelice V, et al. Palmitoylethanolamide in the treatment of chronic pain caused  
23 692 by different etiopathogenesis. *Pain Medicine* 2012;13(9):1121-30. doi:  
24 693 <https://dx.doi.org/10.1111/j.1526-4637.2012.01432.x>
- 25 694 43. Toth C, Mawani S, Brady S, et al. An enriched-enrolment, randomized withdrawal, flexible-dose,  
26 695 double-blind, placebo-controlled, parallel assignment efficacy study of nabilone as adjuvant in  
27 696 the treatment of diabetic peripheral neuropathic pain. *Pain* 2012;153(10):2073-82. doi:  
28 697 <http://dx.doi.org/10.1016/j.pain.2012.06.024>
- 29 698 44. Schifilliti C, Cucinotta L, Fedele V, et al. Micronized palmitoylethanolamide reduces the symptoms of  
30 699 neuropathic pain in diabetic patients. *Pain Res Treat* 2014;2014:849623. doi:  
31 700 10.1155/2014/849623 [published Online First: 2014/05/08]
- 32 701 45. Storr M, Devlin S, Kaplan GG, et al. Cannabis use provides symptom relief in patients with  
33 702 inflammatory bowel disease but is associated with worse disease prognosis in patients with  
34 703 Crohn's disease. *Inflammatory Bowel Diseases* 2014;20(3):472-80. doi:  
35 704 <https://dx.doi.org/10.1097/01.MIB.0000440982.79036.d6>
- 36 705 46. Del Giorno R, Skaper S, Paladini A, et al. Palmitoylethanolamide in Fibromyalgia: Results from  
37 706 Prospective and Retrospective Observational Studies. *Pain and Therapy* 2015;4(2):169-78. doi:  
38 707 <http://dx.doi.org/10.1007/s40122-015-0038-6>
- 39 708 47. Hoggart B, Ratcliffe S, Ehler E, et al. A multicentre, open-label, follow-on study to assess the long-  
40 709 term maintenance of effect, tolerance and safety of THC/CBD oromucosal spray in the  
41 710 management of neuropathic pain. *Journal of Neurology* 2015;262(1):27-40. doi:  
42 711 <https://dx.doi.org/10.1007/s00415-014-7502-9>
- 43 712 48. Ware MA, Wang T, Shapiro S, et al. Cannabis for the Management of Pain: Assessment of Safety  
44 713 Study (COMPASS). *Journal of Pain* 2015;16(12):1233-42. doi:  
45 714 <https://dx.doi.org/10.1016/j.jpain.2015.07.014>
- 46 715 49. Haroutounian S, Ratz Y, Ginosar Y, et al. The Effect of Medicinal Cannabis on Pain and Quality-of-Life  
47 716 Outcomes in Chronic Pain: A Prospective Open-label Study. *Clinical Journal of Pain*  
48 717 2016;32(12):1036-43.

- 1  
2  
3 718 50. Bellnier T, Brown G, Ortega T, et al. A preliminary evaluation of the efficacy, safety, and costs  
4 719 associated with the treatment of chronic pain with medical marijuana in the elderly. *Consultant*  
5 720 *Pharmacist* 2017;32 (10):597. doi: <http://dx.doi.org/10.4140/TCPn.2017.577>  
6 721  
7 721 51. Cranford JA, Arnedt JT, Conroy DA, et al. Prevalence and correlates of sleep-related problems in  
8 722 adults receiving medical cannabis for chronic pain. *Drug & Alcohol Dependence* 2017;180:227-  
9 723 33. doi: <https://dx.doi.org/10.1016/j.drugalcdep.2017.08.017>  
10 724  
11 724 52. Fanelli G, De Carolis G, Leonardi C, et al. Cannabis and intractable chronic pain: an explorative  
12 725 retrospective analysis of Italian cohort of 614 patients. *Journal of pain research* 2017;10:1217-  
13 726 24. doi: <https://dx.doi.org/10.2147/JPR.S132814>  
14 727  
15 727 53. Feingold D, Goor-Aryeh I, Bril S, et al. Problematic Use of Prescription Opioids and Medicinal  
16 728 Cannabis Among Patients Suffering from Chronic Pain. *Pain Medicine* 2017;18(2):294-306. doi:  
17 729 <https://dx.doi.org/10.1093/pm/pnw134>  
18 730  
19 730 54. Paladini A, Varrassi G, Bentivegna G, et al. Palmitoylethanolamide in the Treatment of Failed Back  
20 731 Surgery Syndrome. *Pain Res Treat* 2017;2017:1486010. doi: 10.1155/2017/1486010 [published  
21 732 Online First: 2017/09/07]  
22 733  
23 733 55. Passavanti MB, Fiore M, Sansone P, et al. The beneficial use of ultramicrozoned  
24 734 palmitoylethanolamide as add-on therapy to Tapentadol in the treatment of low back pain: a  
25 735 pilot study comparing prospective and retrospective observational arms. *BMC Anesthesiology*  
26 736 2017;17(1):171. doi: <https://dx.doi.org/10.1186/s12871-017-0461-9>  
27 737  
28 737 56. Schimrigk S, Marziniak M, Neubauer C, et al. Dronabinol Is a Safe Long-Term Treatment Option for  
29 738 Neuropathic Pain Patients. *European Neurology* 2017;78(5-6):320-29. doi:  
30 739 <https://dx.doi.org/10.1159/000481089>  
31 740  
32 740 57. Chirchiglia D, Chirchiglia P, Signorelli F. Nonsurgical lumbar radiculopathies treated with  
33 741 ultramicrozoned palmitoylethanolamide (umPEA): A series of 100 cases. *Neurologia i*  
34 742 *Neurochirurgia Polska* 2018;52(1):44-47. doi: <https://dx.doi.org/10.1016/j.pjnns.2017.11.002>  
35 743  
36 743 58. Crowley K, de Vries ST, Moreno-Sanz G. Self-Reported Effectiveness and Safety of Trokie R Lozenges:  
37 744 A Standardized Formulation for the Buccal Delivery of Cannabis Extracts. *Frontiers in*  
38 745 *Neuroscience* 2018;12:564. doi: <https://dx.doi.org/10.3389/fnins.2018.00564>  
39 746  
40 746 59. Habib G, Artul S. Medical Cannabis for the Treatment of Fibromyalgia. *JCR: Journal of Clinical*  
41 747 *Rheumatology* 2018;24(5):255-58. doi: <https://dx.doi.org/10.1097/RHU.0000000000000702>  
42 748  
43 748 60. Anderson SP, Zylla DM, McGriff DM, et al. Impact of medical cannabis on patient-reported symptoms  
44 749 for patients with cancer enrolled in Minnesota's medical cannabis program. *Journal of Oncology*  
45 750 *Practice* 2019;15(6):E338-E45. doi: <http://dx.doi.org/10.1200/JOP.18.00619>  
46 751  
47 751 61. Bonar EE, Cranford JA, Arterberry BJ, et al. Driving under the influence of cannabis among medical  
48 752 cannabis patients with chronic pain. *Drug & Alcohol Dependence* 2019;195:193-97. doi:  
49 753 <https://dx.doi.org/10.1016/j.drugalcdep.2018.11.016>  
50 754  
51 754 62. Cervigni M, Nasta L, Schievano C, et al. Micronized Palmitoylethanolamide-Polydatin Reduces the  
52 755 Painful Symptomatology in Patients with Interstitial Cystitis/Bladder Pain Syndrome. *BioMed*  
53 756 *Research International* 2019;2019 (no pagination)(9828397) doi:  
54 757 <http://dx.doi.org/10.1155/2019/9828397>  
55 758  
56 758 63. Cremer-Schaeffer P, Schmidt-Wolf G, Broich K. [Cannabis medicines in pain management : Interim  
57 759 analysis of the survey accompanying the prescription of cannabis-based medicines in Germany  
58 760 with regard to pain as primarily treated symptom]. *Der Schmerz* 2019;33(5):415-23. doi:  
59 761 <https://dx.doi.org/10.1007/s00482-019-00399-z>  
60 762  
61 762 64. Lejczak S, Rousselot H, Di Patrizio P, et al. Dronabinol use in France between 2004 and 2017. *Revue*  
62 763 *Neurologique* 2019;175(5):298-304. doi: <https://dx.doi.org/10.1016/j.neurol.2018.07.011>  
63 764  
64 764 65. Loi ES, Pontis A, Cofelice V, et al. Effect of ultramicrozoned-palmitoylethanolamide and co-  
65 765 micronizedpalmitoylethanolamide/polydatin on chronic pelvic pain and quality of life in

- 1  
2  
3 766 endometriosis patients: An open-label pilot study. *International Journal of Women's Health*  
4 767 2019;11:443-49. doi: <http://dx.doi.org/10.2147/IJWH.S204275>
- 5 768 66. Naftali T, Bar-Lev Schleider L, Sklerovsky Benjaminov F, et al. Medical cannabis for inflammatory  
6 769 bowel disease: real-life experience of mode of consumption and assessment of side-effects.  
7 770 *European Journal of Gastroenterology & Hepatology* 2019;31(11):1376-81. doi:  
8 771 <https://dx.doi.org/10.1097/MEG.0000000000001565>
- 9 772 67. Perron BE, Holt KR, Yeagley E, et al. Mental health functioning and severity of cannabis withdrawal  
10 773 among medical cannabis users with chronic pain. *Drug & Alcohol Dependence* 2019;194:401-09.  
11 774 doi: <https://dx.doi.org/10.1016/j.drugalcdep.2018.09.029>
- 12 775 68. Sagy I, Bar-Lev Schleider L, Abu-Shakra M, et al. Safety and Efficacy of Medical Cannabis in  
13 776 Fibromyalgia. *Journal of Clinical Medicine* 2019;8(6):05. doi:  
14 777 <https://dx.doi.org/10.3390/jcm8060807>
- 15 778 69. Sinclair J, Smith CA, Abbott J, et al. Cannabis Use, a Self-Management Strategy Among Australian  
16 779 Women With Endometriosis: Results From a National Online Survey. *Journal of Obstetrics &*  
17 780 *Gynaecology Canada: JOGC* 2020;42(3):256-61. doi:  
18 781 <https://dx.doi.org/10.1016/j.jogc.2019.08.033>
- 19 782 70. Ueberall MA, Essner U, Mueller-Schwefe GHH. Effectiveness and tolerability of THC:CBD oromucosal  
20 783 spray as add-on measure in patients with severe chronic pain: Analysis of 12-week open-label  
21 784 real-world data provided by the German pain e-registry. *Journal of Pain Research* 2019;12:1577-  
22 785 604. doi: <http://dx.doi.org/10.2147/JPR.S192174>
- 23 786 71. Vigil JM, Stith SS, Adams IM, et al. Associations between medical cannabis and prescription opioid  
24 787 use in chronic pain patients: A preliminary cohort study. *PLoS ONE [Electronic Resource]*  
25 788 2017;12(11):e0187795. doi: <https://dx.doi.org/10.1371/journal.pone.0187795>
- 26 789 72. Yassin M, Oron A, Robinson D. Effect of adding medical cannabis to analgesic treatment in patients  
27 790 with low back pain related to fibromyalgia: an observational cross-over single centre study.  
28 791 *Clinical & Experimental Rheumatology* 2019;37 Suppl 116(1):13-20.
- 29 792 73. Giorgi V, Bongiovanni S, Atzeni F, et al. Adding medical cannabis to standard analgesic treatment for  
30 793 fibromyalgia: a prospective observational study. *Clinical & Experimental Rheumatology* 2020;38  
31 794 Suppl 123(1):53-59.
- 32 795 74. Grant BF, Dawson DA, Stinson FS, et al. The Alcohol Use Disorder and Associated Disabilities  
33 796 Interview Schedule-IV (AUDADIS-IV): reliability of alcohol consumption, tobacco use, family  
34 797 history of depression and psychiatric diagnostic modules in a general population sample. *Drug*  
35 798 *Alcohol Depend* 2003;71(1):7-16. doi: 10.1016/s0376-8716(03)00070-x [published Online First:  
36 799 2003/06/25]
- 37 800 75. Humeniuk R, Ali R. Validation of the Alcohol, Smoking and Substance Involvement Screening Test  
38 801 (ASSIST) and pilot brief intervention: a technical report of phase II findings of the WHO ASSIST  
39 802 Project. Validation of the alcohol, smoking and substance involvement screening test (ASSIST)  
40 803 and pilot brief intervention: a technical report of phase II findings of the WHO ASSIST  
41 804 Project2006.
- 42 805 76. Stockings E, Campbell G, Hall WD, et al. Cannabis and cannabinoids for the treatment of people with  
43 806 chronic noncancer pain conditions: a systematic review and meta-analysis of controlled and  
44 807 observational studies. *Pain* 2018;159(10):1932-54. doi: 10.1097/j.pain.0000000000001293  
45 808 [published Online First: 2018/05/31]
- 46 809 77. Allan GM, Finley CR, Ton J, et al. Systematic review of systematic reviews for medical cannabinoids:  
47 810 Pain, nausea and vomiting, spasticity, and harms. *Can Fam Physician* 2018;64(2):e78-e94.  
48 811 [published Online First: 2018/02/17]

- 1  
2  
3 812 78. Campeny E, López-Pelayo H, Nutt D, et al. The blind men and the elephant: Systematic review of  
4 813 systematic reviews of cannabis use related health harms. *Eur Neuropsychopharmacol* 2020;33:1-  
5 814 35. doi: 10.1016/j.euroneuro.2020.02.003 [published Online First: 2020/03/14]  
6  
7 815 79. Memedovich KA, Dowsett LE, Spackman E, et al. The adverse health effects and harms related to  
8 816 marijuana use: an overview review. *CMAJ Open* 2018;6(3):E339-e46. doi:  
9 817 10.9778/cmajo.20180023 [published Online First: 2018/08/18]  
10 818 80. Nugent SM, Morasco BJ, O'Neil ME, et al. The Effects of Cannabis Among Adults With Chronic Pain  
11 819 and an Overview of General Harms: A Systematic Review. *Ann Intern Med* 2017;167(5):319-31.  
12 820 doi: 10.7326/m17-0155 [published Online First: 2017/08/15]  
13 821 81. Els C, Jackson TD, Kunyk D, et al. Adverse events associated with medium- and long-term use of  
14 822 opioids for chronic non-cancer pain: an overview of Cochrane Reviews. *Cochrane Database Syst*  
15 823 *Rev* 2017;10(10):Cd012509. doi: 10.1002/14651858.CD012509.pub2 [published Online First:  
16 824 2017/10/31]  
17 825 82. Rücker G, Schumacher M. Simpson's paradox visualized: the example of the rosiglitazone meta-  
18 826 analysis. *BMC Med Res Methodol* 2008;8:34. doi: 10.1186/1471-2288-8-34 [published Online  
19 827 First: 2008/06/03]  
20 828 83. Diagnostic and statistical manual of mental disorders : DSM-5. Arlington, VA: American Psychiatric  
21 829 Association 2013.  
22 830 84. Goodman JE, McGrath PJ. The epidemiology of pain in children and adolescents: a review. *Pain*  
23 831 1991;46(3):247-64. doi: 10.1016/0304-3959(91)90108-a [published Online First: 1991/09/01]  
24 832 85. Myles H, Myles N, Large M. Cannabis use in first episode psychosis: Meta-analysis of prevalence, and  
25 833 the time course of initiation and continued use. *Aust N Z J Psychiatry* 2016;50(3):208-19. doi:  
26 834 10.1177/0004867415599846 [published Online First: 2015/08/20]  
27 835 86. Veroniki AA, Jackson D, Bender R, et al. Methods to calculate uncertainty in the estimated overall  
28 836 effect size from a random-effects meta-analysis. *Res Synth Methods* 2019;10(1):23-43. doi:  
29 837 10.1002/jrsm.1319 [published Online First: 2018/08/22]  
30 838 87. Shanthanna H, Gilron I, Rajarathinam M, et al. Benefits and safety of gabapentinoids in chronic low  
31 839 back pain: A systematic review and meta-analysis of randomized controlled trials. *PLoS Med*  
32 840 2017;14(8):e1002369. doi: 10.1371/journal.pmed.1002369 [published Online First: 2017/08/16]  
33 841 88. Ferraro MC, Bagg MK, Wewege MA, et al. Efficacy, acceptability, and safety of antidepressants for  
34 842 low back pain: a systematic review and meta-analysis. *Syst Rev* 2021;10(1):62. doi:  
35 843 10.1186/s13643-021-01599-4 [published Online First: 2021/02/26]  
36 844 89. Busse JW, Craigie S, Juurlink DN, et al. Guideline for opioid therapy and chronic noncancer pain.  
37 845 *Cmaj* 2017;189(18):E659-e66. doi: 10.1503/cmaj.170363 [published Online First: 2017/05/10]  
38  
39  
40  
41  
42 846  
43  
44  
45  
46  
47  
48  
49  
50  
51  
52  
53  
54  
55  
56  
57  
58  
59  
60

Figure 1: Study selection process

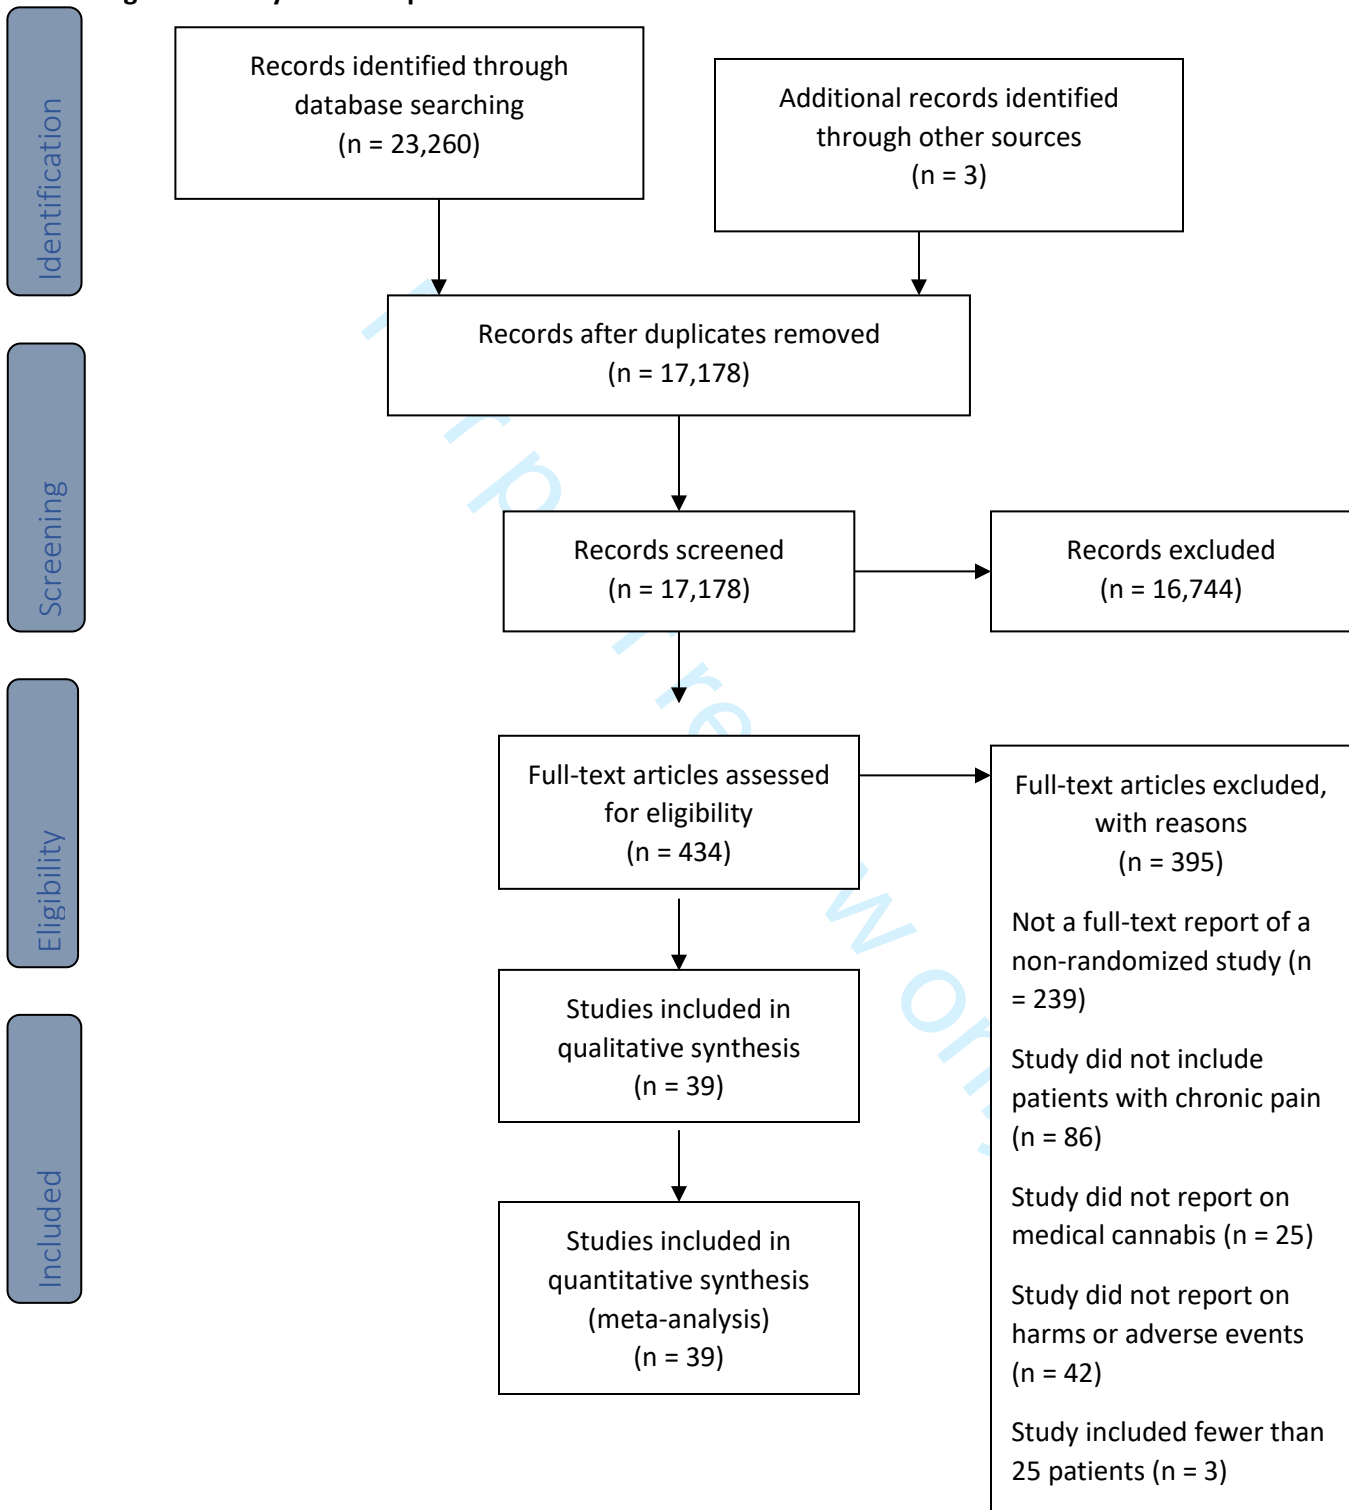

Figure 2: Forest plot of the meta-analysis for all adverse events stratified by type of medical cannabis

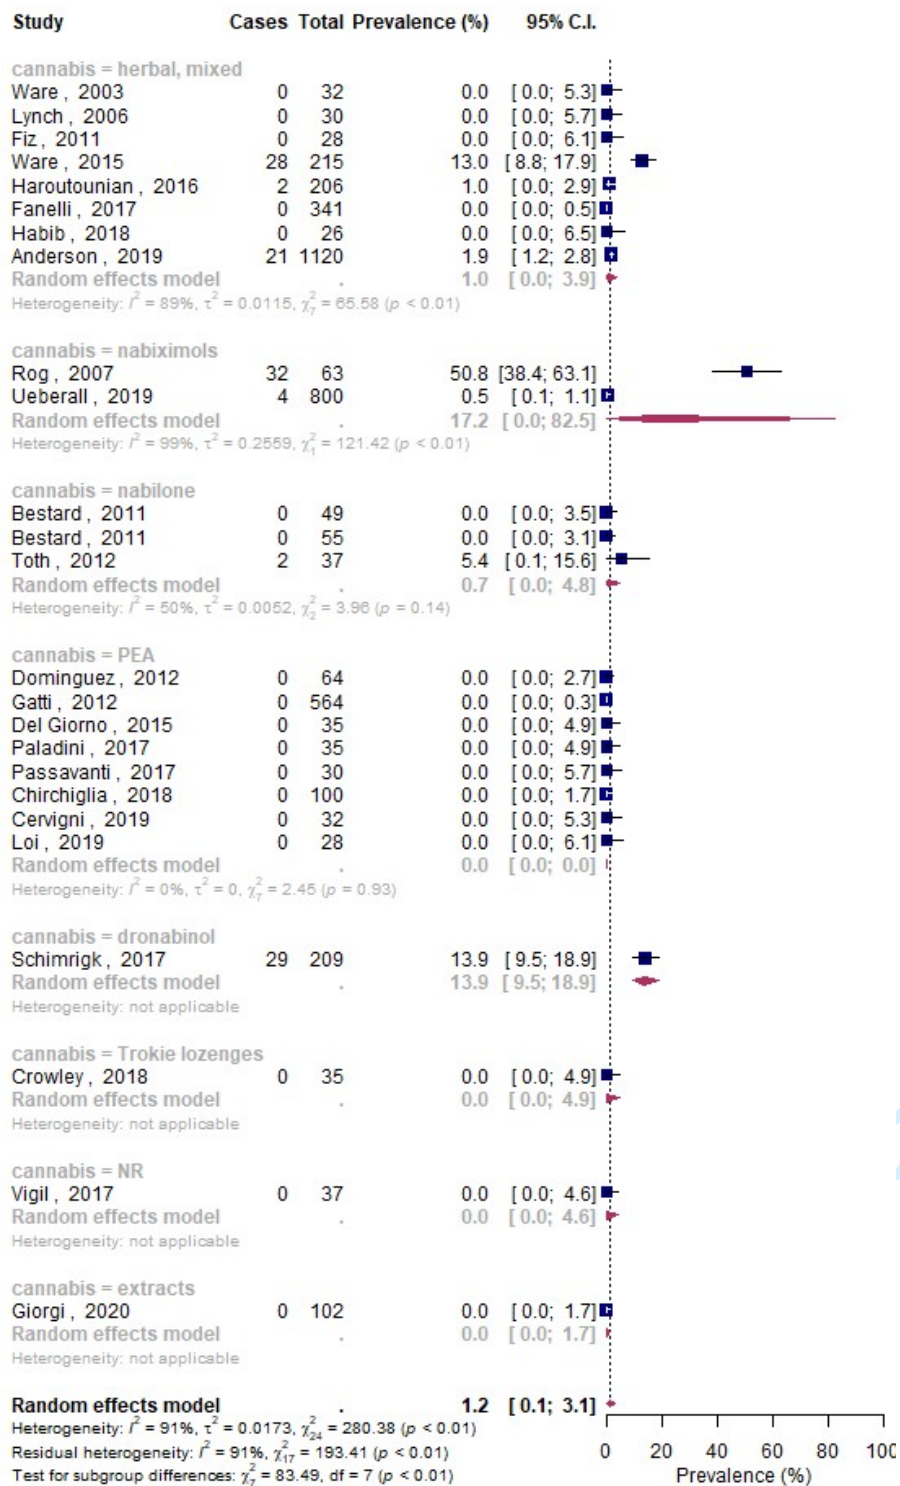



# Long-term and serious harms of medical cannabis and cannabinoids for chronic pain: A systematic review and meta-analysis of non-randomized studies

## Appendix

Dr. Jason Busse

[bussejw@mcmaster.ca](mailto:bussejw@mcmaster.ca)

## Contents

|                                                                                                      |    |
|------------------------------------------------------------------------------------------------------|----|
| Appendix 1: Search strategy .....                                                                    | 3  |
| Appendix 2: Detailed methods for the assessment of risk of bias .....                                | 18 |
| Appendix 3: List of included studies .....                                                           | 19 |
| Appendix 4: Studies excluded at the full-text screening stage.....                                   | 23 |
| Appendix 5: Risk of bias ratings .....                                                               | 52 |
| Appendix 6: Results for all adverse events (subgroup by design) .....                                | 53 |
| Appendix 7: Results for all adverse events (subgroup by duration) .....                              | 54 |
| Appendix 8: Results for all adverse events (subgroup by cannabis).....                               | 55 |
| Appendix 9: Results for all adverse events (subgroup by selection bias) .....                        | 56 |
| Appendix 10: Results for adverse events leading to discontinuation (subgroup by duration).....       | 57 |
| Appendix 11: Results for adverse events leading to discontinuation (subgroup by cannabis) .....      | 58 |
| Appendix 12: Results for adverse events leading to discontinuation (subgroup by selection bias)..... | 59 |
| Appendix 13: Results for serious adverse events (subgroup by design) .....                           | 60 |
| Appendix 14: Results for serious adverse events (subgroup by duration) .....                         | 61 |
| Appendix 15: Results for serious adverse events (subgroup by selection bias) .....                   | 62 |
| Appendix 16: Results for psychiatric adverse events .....                                            | 63 |
| Appendix 17: Results for suicide.....                                                                | 64 |
| Appendix 18: Results for suicidal thoughts .....                                                     | 65 |

|    |                                                        |    |
|----|--------------------------------------------------------|----|
| 1  |                                                        |    |
| 2  |                                                        |    |
| 3  | Appendix 19: Results for depression .....              | 66 |
| 4  |                                                        |    |
| 5  | Appendix 20: Results for mania .....                   | 67 |
| 6  |                                                        |    |
| 7  | Appendix 21: Results for hallucinations .....          | 68 |
| 8  | Appendix 22: Results for delusions.....                | 69 |
| 9  |                                                        |    |
| 10 | Appendix 23: Results for paranoia.....                 | 70 |
| 11 | Appendix 24: Results for anxiety .....                 | 71 |
| 12 |                                                        |    |
| 13 | Appendix 25: Results for euphoria .....                | 72 |
| 14 |                                                        |    |
| 15 | Appendix 26: Results for memory impairment .....       | 73 |
| 16 | Appendix 27: Results for confusion .....               | 74 |
| 17 |                                                        |    |
| 18 | Appendix 28: Results for disorientation .....          | 75 |
| 19 | Appendix 29: Results for impaired attention .....      | 76 |
| 20 |                                                        |    |
| 21 | Appendix 30: Results for falls .....                   | 77 |
| 22 |                                                        |    |
| 23 | Appendix 31: Results for motor vehicle accidents ..... | 78 |
| 24 | Appendix 32: Results for dependence.....               | 79 |
| 25 |                                                        |    |
| 26 | Appendix 33: Results for withdrawal symptoms.....      | 80 |
| 27 |                                                        |    |
| 28 | Appendix 34: Results for withdrawal syndrome.....      | 81 |
| 29 |                                                        |    |
| 30 |                                                        |    |
| 31 |                                                        |    |
| 32 |                                                        |    |
| 33 |                                                        |    |
| 34 |                                                        |    |
| 35 |                                                        |    |
| 36 |                                                        |    |
| 37 |                                                        |    |
| 38 |                                                        |    |
| 39 |                                                        |    |
| 40 |                                                        |    |
| 41 |                                                        |    |
| 42 |                                                        |    |
| 43 |                                                        |    |
| 44 |                                                        |    |
| 45 |                                                        |    |
| 46 |                                                        |    |
| 47 |                                                        |    |
| 48 |                                                        |    |
| 49 |                                                        |    |
| 50 |                                                        |    |
| 51 |                                                        |    |
| 52 |                                                        |    |
| 53 |                                                        |    |
| 54 |                                                        |    |
| 55 |                                                        |    |
| 56 |                                                        |    |
| 57 |                                                        |    |
| 58 |                                                        |    |
| 59 |                                                        |    |
| 60 |                                                        |    |

## **Appendix 1: Search strategy**

|             |       |
|-------------|-------|
| MEDLINE     | 10649 |
| EMBASE      | 6382  |
| Central     | 2426  |
| PsycInfo    | 3801  |
| Subtotal    | 23260 |
| -duplicates | -6085 |
| Total       | 17175 |

April 1, 2020

Database: OVID Medline Epub Ahead of Print, In-Process & Other Non-Indexed Citations, Ovid MEDLINE(R) Daily and Ovid MEDLINE(R) 1946 to Present

Search Strategy:

- 
- 1 Epidemiologic Studies/ (8256)
  - 2 exp Case-Control Studies/ (1067341)
  - 3 exp Cohort Studies/ (1974212)
  - 4 Case control.tw. (123081)
  - 5 (cohort adj (study or studies)).tw. (199133)

- 1
- 2
- 3 6 Cohort analy\$.tw. (7799)
- 4
- 5
- 6
- 7 7 (Follow up adj (study or studies)).tw. (48708)
- 8
- 9
- 10
- 11 8 (observational adj (study or studies)).tw. (103255)
- 12
- 13
- 14
- 15 9 Longitudinal.tw. (239715)
- 16
- 17
- 18 10 Retrospective.tw. (515751)
- 19
- 20
- 21
- 22 11 Cross sectional.tw. (342224)
- 23
- 24
- 25
- 26 12 Cross-sectional studies/ (322752)
- 27
- 28
- 29 13 or/1-12 (2953281)
- 30
- 31
- 32
- 33 14 exp animals/ not humans.sh. (4685189)
- 34
- 35
- 36
- 37 15 13 not 14 (2889789)
- 38
- 39

40 Annotation: SIGN observational studies filter

- 41
- 42
- 43
- 44 16 randomized controlled trial.pt. (503041)
- 45
- 46
- 47
- 48 17 controlled clinical trial.pt. (93591)
- 49
- 50
- 51
- 52 18 randomized.ab. (474985)
- 53
- 54
- 55
- 56 19 placebo.ab. (206552)
- 57
- 58
- 59
- 60

1  
2  
3  
4  
5 20 drug therapy.fs. (2191450)  
6  
7

8  
9 21 randomly.ab. (330409)  
10

11  
12 22 trial.ab. (500400)  
13  
14

15  
16 23 groups.ab. (2028909)  
17  
18

19  
20 24 or/16-23 (4670111)  
21  
22

23  
24 25 exp animals/ not humans.sh. (4685189)  
25  
26

27  
28 26 24 not 25 (4048339)  
29  
30

31 Annotation: Cochrane HSSS RCT filter  
32  
33

34  
35 27 15 or 26 (6033576)  
36  
37

38  
39 Annotation: study design filter broad  
40  
41

42 28 Cannabis/ (8968)  
43  
44

45  
46 29 exp cannabinoids/ or cannabidiol/ or cannabinol/ or dronabinol/ (13810)  
47  
48

49  
50 30 Endocannabinoids/ (5630)  
51  
52

53  
54 31 exp Receptors, Cannabinoid/ (9240)  
55  
56  
57  
58  
59  
60

1  
2  
3 32 (Cannabis or cannabiniol or cannabinoid\* or cannabidiol or bhang or cannador or charas or ganja or  
4 ganjah or hashish or hemp or marihuana or marijuana or nabilone or cesamet or cesametic or ajulemic  
5 acid or cannabichromene or cannabielsoin or cannabigerol or tetrahydrocannabinol or dronabinol or  
6 levonantradol or nabiximols or palmidrol or tetrahydrocannabinolic acid or tetrahydro cannabiniol or  
7 marinol or tetranabinex or sativex or endocannabinoid\*).mp. (54925)  
8  
9

10  
11  
12 33 or/28-32 (54925)  
13  
14

15 Annotation: strategy from 2020 cannabis review  
16  
17

18  
19 34 27 and 33 (16307)  
20  
21

22  
23 Annotation: cannabis AND study design filter  
24  
25

26  
27 35 exp "Drug-Related Side Effects and Adverse Reactions"/ (114376)  
28  
29

30  
31 36 (ae or to or po or co).fs. (3890270)  
32  
33

34  
35 37 (safe or safety).ti,ab. (758301)  
36  
37

38  
39 38 side effect\$.ti,ab. (243706)  
40  
41

42 39 ((adverse or undesirable or harms\$ or serious or toxic) adj3 (effect\$ or reaction\$ or event\$ or  
43 outcome\$)).ti,ab. (501888)  
44  
45

46  
47 40 exp Product Surveillance, Postmarketing/ (15237)  
48  
49

50  
51 41 adverse drug reaction reporting systems/ (7463)  
52  
53

54  
55 42 clinical trials, phase iv/ (295)  
56  
57

1  
2  
3  
4  
5 43 exp Poisoning/ (156177)  
6  
7

8  
9 44 exp Substance-Related Disorders/ (274845)  
10

11  
12 45 Abnormalities, Drug-Induced/ (14514)  
13  
14

15  
16 46 Drug Monitoring/ (20599)  
17  
18

19  
20 47 exp Drug Hypersensitivity/ (45642)  
21  
22

23  
24 48 (toxicity or complication\$ or noxious or tolerability).ti,ab. (1298802)  
25  
26

27  
28 49 or/35-48 (5596308)  
29  
30

31 Annotation: OVID AE filter  
32  
33

34  
35 50 34 and 49 (10649)  
36  
37

38  
39 Annotation: Study design filter AND Cannabis AND AE Filter (broad)  
40  
41

42 Database: Embase <1974 to 2020 March 31>  
43  
44

45  
46 Search Strategy:  
47  
48

49  
50 -----  
51  
52  
53 1 cannabis/ (33859)  
54  
55  
56  
57  
58  
59  
60

1  
2  
3 2 exp cannabinoid/ (65694)  
4  
5

6  
7 3 medical cannabis/ (2104)  
8  
9

10 4 exp cannabinoid receptor/ (14557)  
11  
12

13  
14 5 exp endocannabinoid/ (8589)  
15  
16

17  
18 6 (Cannabis or cannabinol or cannabinoid\* or cannabidiol or bhang or cannador or charas or ganja or  
19 ganjah or hashish or hemp or marihuana or marijuana or nabilone or cesamet or cesametic or ajulemic  
20 acid or cannabichromene or cannabielsoin or cannabigerol or tetrahydrocannabinol or dronabinol or  
21 levonantradol or nabiximols or palmidrol or tetrahydrocannabinolic acid or tetrahydro cannabinol or  
22 marinol or tetranabinex or sativex or endocannabinoid\*).mp. [mp=title, abstract, heading word, drug  
23 trade name, original title, device manufacturer, drug manufacturer, device trade name, keyword, floating  
24 subheading word, candidate term word] (86550)  
25  
26

27  
28  
29 7 or/1-6 (87843)  
30  
31

32  
33 Annotation: cannabis  
34  
35

36 8 clinical study/ (154879)  
37  
38

39 9 case control study/ (153658)  
40  
41

42  
43 10 family study/ (26012)  
44  
45

46  
47 11 longitudinal study/ (137463)  
48  
49

50  
51 12 retrospective study/ (897628)  
52  
53

54  
55 13 prospective study/ (590879)  
56  
57



1  
2  
3  
4  
5 14 randomized controlled trials/ (176633)  
6  
7

8  
9 15 13 not 14 (584662)  
10  
11

12 16 cohort analysis/ (564001)  
13  
14  
15

16 17 (Cohort adj (study or studies)).mp. [mp=title, abstract, heading word, drug trade name, original title,  
17 device manufacturer, drug manufacturer, device trade name, keyword, floating subheading word,  
18 candidate term word] (296961)  
19  
20

21  
22 18 (Case control adj (study or studies)).mp. [mp=title, abstract, heading word, drug trade name, original  
23 title, device manufacturer, drug manufacturer, device trade name, keyword, floating subheading word,  
24 candidate term word] (211490)  
25  
26

27  
28 19 (follow up adj (study or studies)).mp. [mp=title, abstract, heading word, drug trade name, original  
29 title, device manufacturer, drug manufacturer, device trade name, keyword, floating subheading word,  
30 candidate term word] (65948)  
31  
32

33  
34 20 (observational adj (study or studies)).mp. [mp=title, abstract, heading word, drug trade name,  
35 original title, device manufacturer, drug manufacturer, device trade name, keyword, floating subheading  
36 word, candidate term word] (242526)  
37  
38

39  
40 21 (epidemiologic\$ adj (study or studies)).mp. [mp=title, abstract, heading word, drug trade name,  
41 original title, device manufacturer, drug manufacturer, device trade name, keyword, floating subheading  
42 word, candidate term word] (109669)  
43  
44

45  
46 22 (cross sectional adj (study or studies)).mp. [mp=title, abstract, heading word, drug trade name,  
47 original title, device manufacturer, drug manufacturer, device trade name, keyword, floating subheading  
48 word, candidate term word] (385983)  
49  
50

51  
52 23 or/8-12,15-22 (2808984)  
53  
54  
55  
56  
57

1  
2  
3 Annotation: SIGN observational studies filter  
4  
5

6  
7 24 7 and 23 (9720)  
8  
9

10 Annotation: cannabis AND observational studies  
11  
12

13  
14 25 randomized controlled trial/ (597702)  
15  
16

17  
18 26 Controlled clinical study/ (463832)  
19  
20

21  
22 27 random\$.ti,ab. (1518977)  
23  
24

25  
26 28 randomization/ (86491)  
27  
28

29  
30 29 intermethod comparison/ (258334)  
31  
32

33  
34 30 placebo.ti,ab. (303428)  
35  
36

37  
38 31 (compare or compared or comparison).ti. (504683)  
39  
40

41 32 ((evaluated or evaluate or evaluating or assessed or assess) and (compare or compared or comparing  
42 or comparison)).ab. (2082229)  
43  
44

45  
46 33 (open adj label).ti,ab. (78190)  
47  
48

49  
50 34 ((double or single or doubly or singly) adj (blind or blinded or blindly)).ti,ab. (229917)  
51  
52

53  
54 35 double blind procedure/ (171048)  
55  
56  
57  
58  
59  
60

1  
2  
3 36 parallel group\$1.ti,ab. (25201)  
4  
5

6  
7 37 (crossover or cross over).ti,ab. (104010)  
8  
9

10  
11 38 ((assign\$ or match or matched or allocation) adj5 (alternate or group\$1 or intervention\$1 or  
12 patient\$1 or subject\$1 or participant\$1)).ti,ab. (325625)  
13  
14

15  
16 39 (assigned or allocated).ti,ab. (383429)  
17  
18

19  
20 40 (controlled adj7 (study or design or trial)).ti,ab. (343515)  
21  
22

23  
24 41 (volunteer or volunteers).ti,ab. (244577)  
25  
26

27  
28 42 human experiment/ (490389)  
29  
30

31  
32 43 trial.ti. (295850)  
33  
34

35  
36 44 or/25-43 (4952112)  
37

38  
39 Annotation: Cochrane RCT filter  
40  
41

42  
43 45 7 and 44 (14036)  
44  
45

46  
47 Annotation: cannabis AND RCTs  
48  
49

50  
51 46 24 or 45 (21357)  
52

53  
54 Annotation: cannabis AND (Obs studies OR RCTs)  
55  
56  
57  
58  
59  
60

1  
2  
3 47 7 and (23 or 44) (21357)  
4  
5  
6

7 Annotation: logic check  
8  
9

10 48 (ae or si or to or co).fs. (3204803)  
11  
12

13  
14 49 (safe or safety).ti,ab. (1154971)  
15  
16

17  
18 50 side effect\$.ti,ab. (358075)  
19  
20

21  
22 51 ((adverse or undesirable or harm\$ or serious or toxic) adj3 (effect\$ or reaction\$ or event\$ or  
23 outcome\$)).ti,ab. (787739)  
24  
25

26  
27 52 exp adverse drug reaction/ (522775)  
28  
29

30  
31 53 exp drug toxicity/ (125051)  
32  
33

34  
35 54 exp intoxication/ (366563)  
36  
37

38  
39 55 exp drug safety/ (393912)  
40  
41

42  
43 56 exp drug monitoring/ (53058)  
44  
45

46  
47 57 exp drug hypersensitivity/ (56248)  
48  
49

50  
51 58 exp postmarketing surveillance/ (35831)  
52  
53

54  
55 59 exp drug surveillance program/ (26017)  
56  
57  
58  
59  
60

60 exp phase iv clinical trial/ (3822)

61 (toxicity or complication\$ or noxious or tolerability).ti,ab. (1868476)

62 or/48-61 (6002309)

Annotation: OVID AE filter 1-14

63 47 and 62 (6382)

Cannabis AEs

Search Name: cannabis AEs

Date Run: 01/04/2020 18:42:40

Comment:

ID Search Hits

#1 MeSH descriptor: [Cannabis] explode all trees 298

#2 MeSH descriptor: [Cannabinoids] explode all trees 790

#3 MeSH descriptor: [Endocannabinoids] explode all trees 48

- 1  
2  
3 #4 MeSH descriptor: [Endocannabinoids] explode all trees 48  
4  
5  
6  
7 #5 (Cannabis or cannabinal or cannabinoid\* or cannabidiol or bhang or cannador or charas or ganja  
8 or ganjah or hashish or hemp or marihuana or marijuana or nabilone or cesamet or cesametic or ajulemic  
9 acid or cannabichromene or cannabielsoin or cannabigerol or tetrahydrocannabinol or dronabinol or  
10 levonantradol or nabiximols or palmidrol or tetrahydrocannabinolic acid or tetrahydro cannabinal or  
11 marinol or tetranabinex or sativex or endocannabinoid\*):ti,ab,kw (Word variations have been searched)  
12 4370  
13  
14  
15  
16 #6 #1 or #2 or #3 or #4 or #5 4370  
17  
18  
19  
20 #7 MeSH descriptor: [Drug-Related Side Effects and Adverse Reactions] explode all trees 3463  
21  
22  
23  
24 #8 MeSH descriptor: [] explode all trees and with qualifier(s): [adverse effects - AE, toxicity - TO,  
25 poisoning - PO, complications - CO] 169278  
26  
27  
28  
29 #9 (safe or safety):ti,ab,kw (Word variations have been searched) 258304  
30  
31  
32  
33 #10 (side effect\*):ti,ab,kw (Word variations have been searched) 149400  
34  
35  
36  
37 #11 ((adverse or undesirable or harms\* or serious or toxic) near/3 (effect\* or reaction\* or event\* or  
38 outcome\*)):ti,ab,kw (Word variations have been searched) 279577  
39  
40  
41  
42 #12 MeSH descriptor: [Product Surveillance, Postmarketing] explode all trees 191  
43  
44  
45 #13 MeSH descriptor: [Adverse Drug Reaction Reporting Systems] explode all trees 82  
46  
47  
48  
49 #14 MeSH descriptor: [Clinical Trial, Phase IV] explode all trees 0  
50  
51  
52  
53 #15 MeSH descriptor: [Poisoning] explode all trees 2101  
54  
55  
56  
57  
58  
59  
60

- 1  
2  
3 #16 MeSH descriptor: [Substance-Related Disorders] explode all trees 14586  
4  
5  
6  
7 #17 MeSH descriptor: [Abnormalities, Drug-Induced] explode all trees 47  
8  
9  
10  
11 #18 MeSH descriptor: [Drug Monitoring] explode all trees 1725  
12  
13  
14 #19 MeSH descriptor: [Drug Hypersensitivity] explode all trees 965  
15  
16  
17  
18 #20 (toxicity or complication\* or noxious or tolerability):ti,ab,kw (Word variations have been  
19 searched) 332240  
20  
21  
22  
23 #21 #7 or #8 or #9 or #10 or #11 or #12 or #13 or #14 or #15 or #16 or #17 or #18 or #19 or #20  
24 626064  
25  
26  
27  
28 #22 #6 and #21 in Trials 2426  
29  
30

31 PsycInfo

32  
33  
34  
35 Database: APA PsycInfo <1806 to March Week 4 2020>  
36  
37  
38

39 Search Strategy:  
40  
41  
42  
43  
44  
45  
46

47 1 exp cannabis/ or exp cannabinoids/ or tetrahydrocannabinol/ (12819)  
48  
49

50  
51 2 (Cannabis or cannabinal or cannabinoid\* or cannabidiol or bhang or cannador or charas or ganja or  
52 ganjah or hashish or hemp or marihuana or marijuana or nabilone or cesamet or cesametic or ajulemic  
53 acid or cannabichromene or cannabielsoin or cannabigerol or tetrahydrocannabinol or dronabinol or  
54 levonantradol or nabiximols or palmidrol or tetrahydrocannabinolic acid or tetrahydro cannabinal or  
55  
56  
57  
58  
59  
60

1  
2  
3 marinol or tetranabinex or sativex or endocannabinoid\*).mp. [mp=title, abstract, heading word, table of  
4 contents, key concepts, original title, tests & measures, mesh] (26466)  
5  
6  
7

8 3 1 or 2 (26466)  
9

10  
11  
12 4 exp "side effects (drug)"/ (57604)  
13

14  
15 5 (safe or safety).ti,ab. (84148)  
16  
17

18  
19 6 side effect\$.ti,ab. (31950)  
20  
21

22  
23 7 ((adverse or undesirable or harms\$ or serious or toxic) adj3 (effect\$ or reaction\$ or event\$ or  
24 outcome\$)).ti,ab. (44183)  
25  
26

27  
28 8 toxic disorders/ (1433)  
29  
30

31  
32 9 exp "substance use disorder"/ (127742)  
33  
34

35  
36 10 (toxicity or complication\$ or noxious or tolerability).ti,ab. (42844)  
37  
38

39  
40 11 or/4-10 (310848)  
41  
42

43  
44 12 3 and 11 (10984)  
45  
46

47  
48 13 epidemiology/ (49562)  
49  
50

51 14 ((case\* adj5 control\*) or (case adj3 comparison\*) or case-comparison or control group\*).ti,ab,id. not  
52 "Literature Review".md. (95810)  
53  
54  
55  
56  
57  
58  
59  
60



- 1  
2  
3 15 ((cohort or longitudinal or prospective or retrospective).ti,ab,id. or longitudinal study.md. or  
4 prospective study.md. or retrospective study.md.) not "Literature Review".md. (286455)  
5  
6  
7  
8 16 (cross section\* or "prevalence study").ti,ab,id. (80384)  
9  
10  
11  
12 17 clinical trials/ or "treatment outcome clinical trial".md. or ((randomi?ed adj7 trial\*) or ((single or  
13 doubl\* or tripl\* or treb\*) and (blind\* or mask\*)) or (controlled adj3 trial\*) or (clinical adj2 trial\*)).ti,ab,id.  
14 (101001)  
15  
16  
17  
18 18 Case control.mp. (10736)  
19  
20  
21  
22 19 (cohort adj (study or studies)).mp. [mp=title, abstract, heading word, table of contents, key concepts,  
23 original title, tests & measures, mesh] (21026)  
24  
25  
26  
27 20 Cohort analy\$.mp. (2099)  
28  
29  
30  
31 21 (Follow up adj (study or studies)).mp. [mp=title, abstract, heading word, table of contents, key  
32 concepts, original title, tests & measures, mesh] (12876)  
33  
34  
35  
36 22 (Longitudinal or Retrospective or Cross sectional).mp. [mp=title, abstract, heading word, table of  
37 contents, key concepts, original title, tests & measures, mesh] (218589)  
38  
39  
40  
41 23 or/13-22 (561443)  
42  
43  
44 24 12 and 23 (3801)  
45  
46  
47  
48  
49  
50  
51  
52  
53  
54  
55  
56  
57  
58  
59  
60

## **Appendix 2: Detailed methods for the assessment of risk of bias**

We rated studies at serious risk of confounding bias when they when they did not adjust for important predictors of adverse events and cannabis use, including, at minimum, pain intensity, concomitant pain medication, disability status, alcohol use, past cannabis use and at critical risk if they did not include a control group. We rated studies at serious risk of selection bias when studies included prevalent medical cannabis users (i.e., patients who experience serious or debilitating adverse events are more likely to discontinue cannabis and hence less likely to be included in studies of prevalent users). We rated studies at serious risk of misclassification of the intervention if there was evidence that medical cannabis users were not appropriately classified. We rated studies at serious risk of bias due to departure from the intended intervention if the intervention was not delivered as intended or more than 20% of patients discontinued the intervention for reasons unrelated to adverse effects (e.g., costs). We rated studies at serious risk of missing data when 20% or more of the original patients did not have adverse event data. Finally, we rated studies at moderate risk of selective reporting when the study did not differentiate between minor and serious adverse events or when there were indications that adverse events were selectively, and not comprehensively, reported.

### **Appendix 3: List of included studies**

1. Anderson SP, Zylla DM, McGriff DM, Arneson TJ. Impact of medical cannabis on patient-reported symptoms for patients with cancer enrolled in Minnesota's medical cannabis program. *Journal of Oncology Practice*. 2019;15(6):E338-E45.
2. Bellnier T, Brown GW, Ortega TR. Preliminary evaluation of the efficacy, safety, and costs associated with the treatment of chronic pain with medical cannabis. *The Mental Health Clinician*. 2018;8(3):110-5.
3. Bestard JA, Toth CC. An open-label comparison of nabilone and gabapentin as adjuvant therapy or monotherapy in the management of neuropathic pain in patients with peripheral neuropathy. *Pain Practice*. 2011;11(4):353-68.
4. Bonar EE, Cranford JA, Arterberry BJ, Walton MA, Bohnert KM, Ilgen MA. Driving under the influence of cannabis among medical cannabis patients with chronic pain. *Drug & Alcohol Dependence*. 2019;195:193-7.
5. Cervigni M, Nasta L, Schievano C, Lampropoulou N, Ostardo E. Micronized Palmitoylethanolamide-Polydatin Reduces the Painful Symptomatology in Patients with Interstitial Cystitis/Bladder Pain Syndrome. *BioMed Research International*. 2019;2019 (no pagination)(9828397).
6. Chirchiglia D, Chirchiglia P, Signorelli F. Nonsurgical lumbar radiculopathies treated with ultramicronized palmitoylethanolamide (umPEA): A series of 100 cases. *Neurologia i Neurochirurgia Polska*. 2018;52(1):44-7.
7. Cranford JA, Arnedt JT, Conroy DA, Bohnert KM, Bourque C, Blow FC, et al. Prevalence and correlates of sleep-related problems in adults receiving medical cannabis for chronic pain. *Drug & Alcohol Dependence*. 2017;180:227-33.
8. Cremer-Schaeffer P, Schmidt-Wolf G, Broich K. [Cannabis medicines in pain management : Interim analysis of the survey accompanying the prescription of cannabis-based medicines in Germany with regard to pain as primarily treated symptom]. *Der Schmerz*. 2019;33(5):415-23.
9. Crowley K, de Vries ST, Moreno-Sanz G. Self-Reported Effectiveness and Safety of Trokie R Lozenges: A Standardized Formulation for the Buccal Delivery of Cannabis Extracts. *Frontiers in Neuroscience*. 2018;12:564.
10. Del Giorno R, Skaper S, Paladini A, Varrassi G, Coaccioli S. Palmitoylethanolamide in Fibromyalgia: Results from Prospective and Retrospective Observational Studies. *Pain and Therapy*. 2015;4(2):169-78.
11. Domínguez CM, Martín AD, Ferrer FG, Puertas MI, Muro AL, González JM, et al. N-palmitoylethanolamide in the treatment of neuropathic pain associated with lumbosciatica. *Pain Manag*. 2012;2(2):119-24.
12. Fanelli G, De Carolis G, Leonardi C, Longobardi A, Sarli E, Allegri M, et al. Cannabis and intractable chronic pain: an explorative retrospective analysis of Italian cohort of 614 patients. *Journal of pain research*. 2017;10:1217-24.

13. Feingold D, Goor-Aryeh I, Bril S, Delayahu Y, Lev-Ran S. Problematic Use of Prescription Opioids and Medicinal Cannabis Among Patients Suffering from Chronic Pain. *Pain Medicine*. 2017;18(2):294-306.
14. Fiz J, Duran M, Capella D, Carbonell J, Farre M. Cannabis use in patients with Fibromyalgia: Effect on symptoms relief and health-related quality of life. *PLoS ONE*. 2011;6 (4) (no pagination)(e18440).
15. Gatti A, Lazzari M, Gianfelice V, Di Paolo A, Sabato E, Sabato AF. Palmitoylethanolamide in the treatment of chronic pain caused by different etiopathogenesis. *Pain Medicine*. 2012;13(9):1121-30.
16. Giorgi V, Bongiovanni S, Atzeni F, Marotto D, Salaffi F, Sarzi-Puttini P. Adding medical cannabis to standard analgesic treatment for fibromyalgia: a prospective observational study. *Clinical & Experimental Rheumatology*. 2020;38 Suppl 123(1):53-9.
17. Habib G, Artul S. Medical Cannabis for the Treatment of Fibromyalgia. *JCR: Journal of Clinical Rheumatology*. 2018;24(5):255-8.
18. Haroutounian S, Ratz Y, Ginosar Y, Furmanov K, Saifi F, Meidan R, et al. The Effect of Medicinal Cannabis on Pain and Quality-of-Life Outcomes in Chronic Pain: A Prospective Open-label Study. *Clinical Journal of Pain*. 2016;32(12):1036-43.
19. Hoggart B, Ratcliffe S, Ehler E, Simpson KH, Hovorka J, Lejcko J, et al. A multicentre, open-label, follow-on study to assess the long-term maintenance of effect, tolerance and safety of THC/CBD oromucosal spray in the management of neuropathic pain. *Journal of Neurology*. 2015;262(1):27-40.
20. Lejczak S, Rousselot H, Di Patrizio P, Debouverie M. Dronabinol use in France between 2004 and 2017. *Revue Neurologique*. 2019;175(5):298-304.
21. Loi ES, Pontis A, Cofelice V, Pirarba S, Fais MF, Daniilidis A, et al. Effect of ultramicro-nized-palmitoylethanolamide and co-micro-nized-palmitoylethanolamide/polydatin on chronic pelvic pain and quality of life in endometriosis patients: An open-label pilot study. *International Journal of Women's Health*. 2019;11:443-9.
22. Lynch ME, Young J, Clark AJ. A case series of patients using medicinal marijuana for management of chronic pain under the Canadian Marijuana Medical Access Regulations. *Journal of Pain & Symptom Management*. 2006;32(5):497-501.
23. Naftali T, Bar-Lev Schleider L, Sklerovsky Benjaminov F, Lish I, Konikoff FM, Ringel Y. Medical cannabis for inflammatory bowel disease: real-life experience of mode of consumption and assessment of side-effects. *European Journal of Gastroenterology & Hepatology*. 2019;31(11):1376-81.
24. Paladini A, Varrassi G, Bentivegna G, Carletti S, Piroli A, Coaccioli S. Palmitoylethanolamide in the Treatment of Failed Back Surgery Syndrome. *Pain Res Treat*. 2017;2017:1486010.
25. Passavanti MB, Fiore M, Sansone P, Aurilio C, Pota V, Barbarisi M, et al. The beneficial use of ultramicro-nized palmitoylethanolamide as add-on therapy to Tapentadol in the treatment of low back pain: a pilot study comparing prospective and retrospective observational arms. *BMC Anesthesiology*. 2017;17(1):171.

- 1
  - 2
  - 3
  - 4
  - 5
  - 6
  - 7
  - 8
  - 9
  - 10
  - 11
  - 12
  - 13
  - 14
  - 15
  - 16
  - 17
  - 18
  - 19
  - 20
  - 21
  - 22
  - 23
  - 24
  - 25
  - 26
  - 27
  - 28
  - 29
  - 30
  - 31
  - 32
  - 33
  - 34
  - 35
  - 36
  - 37
  - 38
  - 39
  - 40
  - 41
  - 42
  - 43
  - 44
  - 45
  - 46
  - 47
  - 48
  - 49
  - 50
  - 51
  - 52
  - 53
  - 54
  - 55
  - 56
  - 57
  - 58
  - 59
  - 60
26. Perron BE, Holt KR, Yeagley E, Ilgen M. Mental health functioning and severity of cannabis withdrawal among medical cannabis users with chronic pain. *Drug & Alcohol Dependence*. 2019;194:401-9.
27. Rog DJ, Nurmikko TJ, Young CA. Oromucosal delta9-tetrahydrocannabinol/cannabidiol for neuropathic pain associated with multiple sclerosis: an uncontrolled, open-label, 2-year extension trial. *Clinical Therapeutics*. 2007;29(9):2068-79.
28. Sagy I, Bar-Lev Schleider L, Abu-Shakra M, Novack V. Safety and Efficacy of Medical Cannabis in Fibromyalgia. *Journal of Clinical Medicine*. 2019;8(6):05.
29. Schifilliti C, Cucinotta L, Fedele V, Ingegnosi C, Luca S, Leotta C. Micronized palmitoylethanolamide reduces the symptoms of neuropathic pain in diabetic patients. *Pain Res Treat*. 2014;2014:849623.
30. Schimrigk S, Marziniak M, Neubauer C, Kugler EM, Werner G, Abramov-Sommariva D. Dronabinol Is a Safe Long-Term Treatment Option for Neuropathic Pain Patients. *European Neurology*. 2017;78(5-6):320-9.
31. Sinclair J, Smith CA, Abbott J, Chalmers KJ, Pate DW, Armour M. Cannabis Use, a Self-Management Strategy Among Australian Women With Endometriosis: Results From a National Online Survey. *Journal of Obstetrics & Gynaecology Canada: JOGC*. 2020;42(3):256-61.
32. Storr M, Devlin S, Kaplan GG, Panaccione R, Andrews CN. Cannabis use provides symptom relief in patients with inflammatory bowel disease but is associated with worse disease prognosis in patients with Crohn's disease. *Inflammatory Bowel Diseases*. 2014;20(3):472-80.
33. Toth C, Mawani S, Brady S, Chan C, Liu C, Mehina E, et al. An enriched-enrolment, randomized withdrawal, flexible-dose, double-blind, placebo-controlled, parallel assignment efficacy study of nabilone as adjuvant in the treatment of diabetic peripheral neuropathic pain. *Pain*. 2012;153(10):2073-82.
34. Ueberall MA, Essner U, Mueller-Schwefe GHH. Effectiveness and tolerability of THC:CBD oromucosal spray as add-on measure in patients with severe chronic pain: Analysis of 12-week open-label real-world data provided by the German pain e-registry. *Journal of Pain Research*. 2019;12:1577-604.
35. Vigil JM, Stith SS, Adams IM, Reeve AP. Associations between medical cannabis and prescription opioid use in chronic pain patients: A preliminary cohort study. *PLoS ONE [Electronic Resource]*. 2017;12(11):e0187795.
36. Ware MA, Doyle CR, Woods R, Lynch ME, Clark AJ. Cannabis use for chronic non-cancer pain: results of a prospective survey. *Pain*. 2003;102(1-2):211-6.
37. Ware MA, Wang T, Shapiro S, Collet JP, team Cs. Cannabis for the Management of Pain: Assessment of Safety Study (COMPASS). *Journal of Pain*. 2015;16(12):1233-42.
38. Weber J, Schley M, Casutt M, Gerber H, Schuepfer G, Rukwied R, et al. Tetrahydrocannabinol (Delta 9-THC) treatment in chronic central neuropathic pain and fibromyalgia patients: Results of a multicenter survey. *Anesthesiology Research and Practice*. 2009;2009 (no pagination)(827290).

1  
2  
3 39. Yassin M, Oron A, Robinson D. Effect of adding medical cannabis to analgesic treatment in patients  
4 with low back pain related to fibromyalgia: an observational cross-over single centre study. *Clinical &*  
5 *Experimental Rheumatology*. 2019;37 Suppl 116(1):13-20.  
6  
7  
8  
9  
10  
11  
12  
13  
14  
15  
16  
17  
18  
19  
20  
21  
22  
23  
24  
25  
26  
27  
28  
29  
30  
31  
32  
33  
34  
35  
36  
37  
38  
39  
40  
41  
42  
43  
44  
45  
46  
47  
48  
49  
50  
51  
52  
53  
54  
55  
56  
57  
58  
59  
60

For peer review only

## **Appendix 4: Studies excluded at the full-text screening stage**

### **Not a full-text report of a non-randomized study**

1. Apro MS. Prevention of chemotherapy-induced nausea and vomiting in patients with cancer. *Arizona Medicine*. 1981;38(11):843-5.
2. Abrams DI, Guzman M. Cannabis in cancer care. *Clinical Pharmacology & Therapeutics*. 2015;97(6):575-86.
3. Actrn. Cannabis-Based Medicine (Sativex) in the Treatment of Pain in Kidney Failure. <http://www.who.int/trialssearch/Trial2.aspx?TrialID=ACTRN12610000783022>. 2010.
4. Actrn. The CANBACK trial, to determine the efficacy of oral cannabidiol, when compared to placebo, as an adjunct for the treatment of acute non-traumatic low back pain. <http://www.who.int/trialssearch/Trial2.aspx?TrialID=ACTRN12618000487213>. 2018.
5. Adhiyaman V, Arshad S. Cannabis for intractable nausea after bilateral cerebellar stroke. *Journal of the American Geriatrics Society*. 2014;62(6):1199.
6. Ahmed A, van der Marck MA, van den Elsen G, Olde Rikkert M. Cannabinoids in late-onset Alzheimer's disease. *Clinical Pharmacology & Therapeutics*. 2015;97(6):597-606.
7. Ahmed AI, van den Elsen GA, van der Marck MA, Olde Rikkert MG. Cannabinoids for pain in dementia: the good, the bad, and the ugly. *Journal of the American Geriatrics Society*. 2014;62(5):1001-2.
8. Anonymous. Latest trial suggests cannabis does not relieve spasticity of multiple sclerosis. *Pharmaceutical Journal*. 2002;268(7198):675.
9. Anonymous. Cannabis derivatives and pain. A small role for delta9-tetrahydrocannabinol (THC) in some forms of multiple sclerosis. *Prescrire International*. 2009;18(103):226.
10. Anonymous. Association between cannabis use and complications related to ulcerative colitis in hospitalized patients: A propensity matched retrospective cohort study: Erratum. *Medicine*. 2019;98(35):e17046.
11. Arboleda MF, Dam V, Prosk E, Dworkind M, Vigano A. Cannabis-Based Medications: The Future Co-analgesics of Choice for Cancer Patients? *Journal of Pain and Symptom Management*. 2018;56 (6):e68.
12. Arboleda MF, Dam V, Prosk E, Dworkind M, Vigano A. Transforming symptom management in cancer patients: Is medical cannabis a new paradigm? *Supportive Care in Cancer*. 2018;26 (2 Supplement 1):S53.
13. Ashton CH. Adverse effects of cannabis and cannabinoids. *British Journal of Anaesthesia*. 1999;83(4):637-49.
14. Ballas SK. Use of marijuana in patients with sickle cell disease increased the frequency of hospitalization for acute painful vaso-occlusive crises. *Blood Conference: 58th Annual Meeting of the American Society of Hematology, ASH*. 2016;128(22).

15. Bergamaschi V, Konrad G, Battaglia MA, Brichetto G. Efficacy and discontinuation of nabiximols in patients with multiple sclerosis: A real-life study. *Multiple Sclerosis Journal*. 2018;24 (2 Supplement):959.
16. Bertsche T, Schulz M. Cannabis can relieve spasticity associated with multiple sclerosis. [German]. *Pharmazeutische Zeitung*. 2003;148(8):32-3.
17. Bialas P, Drescher B, Gottschling S, Juckenhofel S, Konietzke D, Kuntz W, et al. [Cannabis-based medicines for chronic pain: indications, selection of drugs, effectiveness and safety : Experiences of pain physicians in Saarland]. *Der Schmerz*. 2019;33(5):399-406.
18. Blondin N. The evolving role of complementary cannabis therapy in glioblastoma treatment. *Neuro-Oncology*. 2018;20 (Supplement 6):vi214-vi5.
19. Bronstein K, Dhaliwal J, Leider H. Rates of inappropriate drug use in the chronic pain population: An update. *Journal of Pain*. 2011;1):P5.
20. Brusberg M, Kang D, Larsson H, Lindstrom E, Martinez V. Inhibition of fatty acid amide hydrolase (FAAH) activity enhances the analgesic action of the endocannabinoid anandamide on visceral pain. *Gastroenterology*. 2009;1):A141.
21. Bulbul A, Mino EA, Khorsand-Sahbaie M, Lentkowski L. Opioid dose reduction and pain control with medical cannabis. *Journal of Clinical Oncology Conference*. 2018;36(34 Supplement).
22. Caulley L, Caplan B, Ross E. Medical Marijuana for Chronic Pain. *New England Journal of Medicine*. 2018;379(16):1575-7.
23. Clements-Nolle K, Lensch T, Larson S, Yang W. Prevalence and correlates of any and frequent synthetic cannabinoid use in a representative sample of high school students. *Substance Use & Misuse*. 2016;51(9):1139-46.
24. Costales B, Van Boemmel-Wegmann S, Segal R. A descriptive analysis of Florida medical marijuana registry patients from 2016-2017. *Pharmacoepidemiology and Drug Safety*. 2019;28 (Supplement 2):268.
25. Cuestas E. [Cannabis for chronic neuropathic pain.]. *Revista de la Facultad de Ciencias Medicas de Cordoba*. 2019;76(1):1-2.
26. De Trane S, Buchanan K, Keenan L, Valentine C, Liddicut M, Stevenson V, et al. Nabiximols has a beneficial effect on self report of MS related spasticity. *Multiple Sclerosis*. 2016;22 (Supplement 3):684.
27. De Trane S, Buchanan K, Keenan L, Valentine C, Liddicut M, Stevenson V, et al. Thc:cbd (nabiximols) has a beneficial effect on multiple sclerosis (MS) related spasticity and delays or negates the need for intrathecal baclofen pump implantation. *Neurology Conference: 69th American Academy of Neurology Annual Meeting, AAN*. 2017;88(16 Supplement 1).
28. Degenhardt L, Hall WD. The adverse effects of cannabinoids: implications for use of medical marijuana. *CMAJ Canadian Medical Association Journal*. 2008;178(13):1685-6.
29. Di Francesco A, Pizzigallo D. Use of micronized palmitoylethanolamide and trans-polydatin in chronic pelvic pain associated with endometriosis. An open-label study. *Giornale Italiano di Ostetricia e Ginecologia*. 2014;36(2):353-8.



- 1  
2  
3 30. Dimou T, Spanomanoli A, Michelis S. The use of palmitoylethanolamide (PEA) in FBSS for chronic  
4 pain management. *Regional Anesthesia and Pain Medicine*. 2019;44 (10 Supplement 1):A168.  
5  
6 31. Donato F, Turri M, Zanette G, Tugnoli V, Deotto L, Teatini F, et al. A study of cortical and spinal  
7 excitability in patients affected by multiple sclerosis and spasticity after oromucosal cannabinoid spray  
8 (THC/CBD). *Clinical Neurophysiology*. 2016;127 (4):e147.  
9  
10 32. Donovan KA. Age-related differences in cannabis use by cancer patients referred for supportive  
11 care. Diane Portman. *Journal of Clinical Oncology Conference*. 2019;37(31 Supplement 1).  
12  
13 33. Dow GJ, Meyers FH, Stanton W, Devine ML. Serious reactions to oral delta-9-  
14 tetrahydrocannabinol in cancer chemotherapy patients. *Clinical Pharmacy*. 1984;3(1):14.  
15  
16 34. Dusi V, Attili SVS, Singaraju M. Observational study on role of crude cannabis in pain control and  
17 quality of life in terminally ill cancer patients: An Indian perspective. *Annals of Oncology*. 2019;30  
18 (Supplement 9):ix119.  
19  
20 35. Eltayb A, Etges T, Wright S. An observational post-approval registry study of patients prescribed  
21 Sativex. Results from clinical practice. *Multiple Sclerosis*. 2013;1):480.  
22  
23 36. Erbe B. [Cannabis - medicinal use]. *Deutsche Medizinische Wochenschrift*. 2014;139(3):74-5.  
24  
25 37. Euctr AT. SATIVEX® AS ADD-ON THERAPY VS. FURTHER OPTIMIZED FIRST-LINE ANTISPASTICS.  
26 <http://www.who.int/trialssearch/Trial2.aspx?TrialID=EUCTR2015-004451-40-AT>. 2016.  
27  
28 38. Euctr BE. An investigational study to assess the effect of GS-5745 on adult patients with Cystic  
29 Fibrosis. <http://www.who.int/trialssearch/Trial2.aspx?TrialID=EUCTR2015-002192-23-BE>. 2016.  
30  
31 39. Euctr DE. A cannabis preparation for neuropathic pain.  
32 <http://www.who.int/trialssearch/Trial2.aspx?TrialID=EUCTR2014-005344-17-DE>. 2015.  
33  
34 40. Euctr DK. Effect of Sativex on pain and spasticity following spinal cord injury.  
35 <http://www.who.int/trialssearch/Trial2.aspx?TrialID=EUCTR2012-005328-14-DK>. 2013.  
36  
37 41. Euctr DK. The effect of cannabis products on nerve pain and muscle stiffness in patients with  
38 multiple sclerosis and in patients with spinal cord injury.  
39 <http://www.who.int/trialssearch/Trial2.aspx?TrialID=EUCTR2018-002315-98-DK>. 2018.  
40  
41 42. Euctr GB. Study of Sativex for the Treatment of Cancer Related Pain.  
42 <http://www.who.int/trialssearch/Trial2.aspx?TrialID=EUCTR2009-016065-29-GB>. 2010.  
43  
44 43. Euctr IT. CLINICAL STUDY TO EVALUATE THE EFFECTIVENESS OF Sativex in relieving pain PEOPLE  
45 AFFECTED BY MULTIPLE SCLEROSIS. <http://www.who.int/trialssearch/Trial2.aspx?TrialID=EUCTR2011-002258-30-IT>. 2012.  
46  
47 44. Euctr NL. ?9-THC (Namisol®) in persistent postsurgical pain.  
48 <http://www.who.int/trialssearch/Trial2.aspx?TrialID=EUCTR2012-000812-27-NL>. 2012.  
49  
50 45. Euctr NL. Perioperative ?9-THC for postsurgical pain.  
51 <http://www.who.int/trialssearch/Trial2.aspx?TrialID=EUCTR2012-005808-17-NL>. 2013.  
52  
53  
54  
55  
56  
57  
58  
59  
60

- 1  
2  
3 46. Eucetr NL. Interaction between opioids and cannabinoids in the treatment of fibromyalgia pain.  
4 <http://www.who.int/trialssearch/Trial2.aspx?TrialID=EUCTR2019-001861-33-NL>. 2019.  
5  
6 47. Fernandez O. Advances in the management of multiple sclerosis spasticity: Recent clinical trials.  
7 *European Neurology*. 2014;72:9-11.  
8  
9 48. Ferrante F, Polito G, Ferraro M. DELTA-9-tetrahydrocannabinol (Sativex) for the treatment of  
10 multiple sclerosis spasticity: Evaluation of effectiveness and safety. *European Journal of Hospital*  
11 *Pharmacy*. 2019;26 (Supplement 1):A239.  
12  
13 49. Ferre L, Nuara A, Pavan G, Radaelli M, Moiola L, Rodegher M, et al. Medium and long term efficacy  
14 of nabiximols for the treatment of multiple sclerosis related spasticity: An Italian monocentric study.  
15 *Multiple Sclerosis*. 2015;1):728-9.  
16  
17 50. Ferre L, Pavan G, Nuara A, Radaelli M, Liberatore G, Guaschino C, et al. Efficacy, safety and  
18 response rate to Nabiximol for the treatment of MS-related spasticity in an Italian monocentric cohort.  
19 *Multiple Sclerosis*. 2015;21 (4):501-2.  
20  
21 51. Ferre L, Sorosina M, Santoro S, Moiola L, Rodegher M, Colombo B, et al. Efficacy, safety and  
22 response rate of nabiximols assessed in an Italian monocentric cohort. *Multiple Sclerosis*. 2014;1):469-70.  
23  
24 52. Fitzcharles MA, McDougall J, Ste-Marie PA, Padjen I. Clinical implications for cannabinoid use in  
25 the rheumatic diseases: potential for help or harm? *Arthritis & Rheumatism*. 2012;64(8):2417-25.  
26  
27 53. Flachenecker P, Zettl U, Henze T. THC:CBD oromucosal spray (nabiximols) in the long term  
28 treatment of multiple sclerosis spasticity. The MOVE 2 long-term study. *Multiple Sclerosis*. 2013;1):527.  
29  
30 54. Flank J, Lavoratore S, Vol H, Taylor T, Zelunka E, Nathan P, et al. Chemotherapy-induced nausea  
31 and vomiting in children receiving high dose methotrexate with or without vincristine: Preliminary results.  
32 *Canadian Journal of Hospital Pharmacy*. 2014;67 (1):61.  
33  
34 55. Freidel M, Tiel-Wilck K, Schreiber H, Lang M. Resistant multiple sclerosis spasticity (MSS)  
35 treatment with THC:CBD spray and effects on driving ability. *Multiple Sclerosis*. 2013;1):522-3.  
36  
37 56. Friedman D, Devinsky O. Cannabinoids in the Treatment of Epilepsy. *New England Journal of*  
38 *Medicine*. 2015;373(11):1048-58.  
39  
40 57. Funke A, Spittel S, Kettemann D, Maier A, Munch C, Meyer T. Delta-9-Tetrahydrocannabinol-  
41 cannabidiol (THC/CBD) oromucosal spray for the treatment of spasticity in ALS - Assessment of patient  
42 reported outcomes. *Clinical Neurophysiology*. 2018;129 (8):e83.  
43  
44 58. Gallo E, Maggini V, Comite M, Sofi F, Baccetti S, Vannacci A, et al. SENeCA Study: Observational  
45 study on the effect of medicinal cannabis on quality of life and nutritional outcomes. *BMC Complementary*  
46 *and Alternative Medicine Conference: World Congress Integrative Medicine and Health*.  
47 2017;17(Supplement 1).  
48  
49 59. Galvin D, Mulkerrin O. Cannabis-based medications: A comparison of patients' knowledge and  
50 awareness in pain, neurology and prescription out-patient settings. *Pain Practice*. 2018;18 (Supplement  
51 1):60.  
52  
53  
54  
55  
56  
57  
58  
59  
60

- 1  
2  
3 60. Gamaoun R, Kasvis P, Patronidis F, Arboleda MF, Vigano A. Potential impact of medical cannabis  
4 treatment on pain control among cancer patients in Quebec-Canada: A pilot study. *Supportive Care in*  
5 *Cancer*. 2019;27 (1 Supplement):S54-S5.  
6  
7 61. Gaston T, Szaflarski M, Hansen B, Grayson L, Bebin EM, Szaflarski J. Improvement in quality of life  
8 ratings after one year of treatment with pharmaceutical formulation of cannabidiol (CBD). *Epilepsia*.  
9 2017;58 (Supplement 5):S159.  
10  
11 62. Gauter B, Rukwied R, Konrad C. [Use and effectiveness of dronabinol (delta9-  
12 tetrahydrocannabinol) in chronic pain]. *Der Schmerz*. 2004;18 Suppl 2:S11-4.  
13  
14 63. Gerardi MC, Batticciotto A, Talotta R, Ditto MC, Atzeni F, Sarzi-Puttini P. Efficacy of cannabis flos  
15 in patients with fibromyalgia: A monocentric observational study. *Arthritis and Rheumatology*. 2016;68  
16 (Supplement 10):72-4.  
17  
18 64. Gilmore D, Hooper C, Nemastil CJ, Dell ML, McCoy K, Kirkby SE. Effects of self-reported marijuana  
19 use on adherence and mental health disease in cystic fibrosis. *Pediatric Pulmonology*. 2018;53  
20 (Supplement 2):424.  
21  
22 65. Gubbiotti M, Illiano E, Costantini E, Giannantoni A. Palmitoylethanolamide/polydatin as add-on  
23 therapy in pain resistant patients with interstitial cystitis/bladder painful syndrome. *European Urology,*  
24 *Supplements*. 2019;18 (1):e1970.  
25  
26 66. Guerrero LJ, Maclas IC, Del Castillo SSF, Izquierdo MM, Rengifo CD, Nunez MN. Effectiveness and  
27 safety of d-9-tetrahydrocannabinol (sativex) in patients with multiple sclerosis spasticity. *European*  
28 *Journal of Hospital Pharmacy*. 2017;24 (Supplement 1):A113.  
29  
30 67. Guindon J. Nabilone in inflammatory pain: to be or not to be. *Clinical & Experimental*  
31 *Pharmacology & Physiology*. 2012;39(4):327-8.  
32  
33 68. Gurevich T, Bar Lev Chleider L, Rosenberg A, Knaani J, Baruch Y, Djaldetti R. Effect of medical  
34 cannabis in Parkinson's disease: Survey of patient experiences. *Movement Disorders*. 2015;1):S88-S9.  
35  
36 69. Gutierrez T, Hohmann AG. Cannabinoids for the treatment of neuropathic pain: Are they safe and  
37 effective? *Future Neurology*. 2011;6(2):129-33.  
38  
39 70. Guttenthaler V, Wittmann M. Replacement of benzodiazepines by cannabinoids for the  
40 preoperative medication-a feasibility trial (Beach-Trial). *Medical Cannabis and Cannabinoids*. 2019;2  
41 (2):78.  
42  
43 71. Gyang T, Hyland M, Samkoff L, Goodman A. "Real world" experience of medical marijuana in  
44 symptomatic management of multiple sclerosis and transverse myelitis. *Neurology Conference: 70th*  
45 *Annual Meeting of the American Academy of Neurology, AAN*. 2018;90(15 Supplement 1).  
46  
47 72. Hansra D, Granada H. Evaluation of safety, efficacy, and clinical endpoints of delta-9-  
48 tetrahydrocannabinol in patients age 60 or older with hematologic and oncologic malignancies. *Blood*  
49 *Conference: 59th Annual Meeting of the American Society of Hematology, ASH*. 2017;130(Supplement 1).  
50  
51  
52  
53  
54  
55  
56  
57  
58  
59  
60

- 1  
2  
3 73. Hansra DM. Evaluation of safety, efficacy, and other clinical endpoints of delta-9-  
4 tetrahydrocannabinol in older patients with hem/onc malignancies. *Journal of Clinical Oncology*  
5 *Conference*. 2017;35(15 Supplement 1).  
6  
7 74. Haupts M, Jonas A, Witte K, Alvarez-Ossorio L. Influence of optimized anti-spastic pre-treatment  
8 on the efficacy and tolerability of THC: CBD oromucosal spray in multiple sclerosis spasticity patients. A  
9 post-hoc RCT data analyses. *Multiple Sclerosis*. 2015;1):708-9.  
10  
11 75. Hicks K, Snyder C. Impact of high-dose cannabis use in patients with advanced pancreatic cancer  
12 undergoing treatment in a phase i clinical trial: Lessons learned and impact on future clinical research  
13 design. *Journal of Oncology Pharmacy Practice*. 2018;24 (2 Supplement 1):8.  
14  
15 76. Higgins P, Ginsburg D, Gilder K, Walsh B, English B, Turner S, et al. Safety and efficacy of olorinab,  
16 a peripherally restricted, highly-selective, cannabinoid receptor 2 agonist in a phase 2A study in chronic  
17 abdominal pain associated with Crohn's disease. *Journal of Crohn's and Colitis*. 2019;13 (Supplement  
18 1):S318.  
19  
20 77. Hill KP, Hurley-Welljams-Dorof WM. Low to moderate quality evidence demonstrates the  
21 potential benefits and adverse events of cannabinoids for certain medical indications. *Evidence Based*  
22 *Medicine*. 2016;21(1):17.  
23  
24 78. Hobart JC, Zajicek JP. Cannabis as a symptomatic treatment for MS: Clinically meaningful MUSEC  
25 to the stiffness and walking problems of people with MS. *Multiple Sclerosis*. 2012;1):247.  
26  
27 79. Hoffenberg E, Murphy B, Mikulich-Gilbertson S, McWilliams S, Hoffenberg A, Hopfer C. Why and  
28 how adolescents and young adults with inflammatory bowel disease use cannabis. *Journal of Pediatric*  
29 *Gastroenterology and Nutrition*. 2017;65 (Supplement 2):S147-S8.  
30  
31 80. Honarmand K, Tierney MC, O'Connor P, Feinstein A. Effects of cannabis on cognitive function in  
32 patients with multiple sclerosis. *Neurology*. 2011;76(13):1153-60.  
33  
34 81. Huestis MA, Elsohly M, Nebro W, Barnes A, Gustafson RA, Smith ML. Estimating time of last oral  
35 ingestion of cannabis from plasma THC and THCCOOH concentrations. *Therapeutic Drug Monitoring*.  
36 2006;28(4):540-4.  
37  
38 82. Hulgan T, Kingsley P, Koethe J, Sterling T, Patel S. Associations between circulating  
39 endocannabinoids and cardio-metabolic factors in HIV-infected persons on antiretroviral therapy: A pilot  
40 study. *Antiviral Therapy*. 2014;2):A8.  
41  
42 83. Irving P, Iqbal T, Nwokolo C, Subramanian S, Bloom S, Prasad N, et al. Trial to assess cannabidiol  
43 in the symptomatic treatment of ulcerative colitis. *Gut*. 2015;1):A430.  
44  
45 84. Isrctn. A one year open label assessment of the use of nabilone in the treatment of chronic  
46 neuropathic pain. <http://www.who.int/trialssearch/Trial2.aspx?TrialID=ISRCTN38408594>. 2007.  
47  
48 85. Jamal N, Korman J, Musing M, Malavade A, Coleman BL, Siddiqui N, et al. The effect of  
49 preoperative cannabis use on opioid consumption following surgery: A cohort analysis. *Canadian Journal*  
50 *of Hospital Pharmacy*. 2018;71 (1):73.  
51  
52  
53  
54  
55  
56  
57  
58  
59  
60

- 1  
2  
3 86. Kalu N, O'Neal PA, Nwokolo C, Diaz S, Owoyemi O. The use of marijuana and hydroxyurea among  
4 sickle cell patients. *Blood Conference: 58th Annual Meeting of the American Society of Hematology, ASH.*  
5 2016;128(22).  
6
- 7 87. Kanaan AS, Muller-Vahl KR. Cannabinoid-based medicines for the treatment of Gilles de la  
8 Tourette syndrome. *Handbook of cannabis and related pathologies: Biology, pharmacology, diagnosis,*  
9 *and treatment.* San Diego, CA: Elsevier Academic Press; US; 2017. p. 883-92.  
10
- 11 88. Keating GM. Delta-9-Tetrahydrocannabinol/Cannabidiol Oromucosal Spray (Sativex R): A Review  
12 in Multiple Sclerosis-Related Spasticity. *Drugs.* 2017;77(5):563-74.  
13
- 14 89. Khalid L, Starrels JL, Sohler N, Arnsten JH, Jost J, Cunningham C. Marijuana use is associated with  
15 low prescription opioid analgesic (POA) use among hiv-infected patients with chronic pain. *Journal of*  
16 *General Internal Medicine.* 2016;1):S297.  
17
- 18 90. Kiszko K, Patel K, Chudasama B, Samodulski J, Nienaber C, Martins-Welch D, et al. Older adults'  
19 perspectives on medical marijuana (MM) use. *Journal of the American Geriatrics Society.* 2017;65  
20 (Supplement 1):S70.  
21
- 22 91. Klooker T, Liefeld K, Van Den Wijngaard RM, Boeckxstaens GE. The cannabinoid receptor agonist  
23 delta-9-tetrahydrocannabinol increases rectal sensitivity in IBS patients and healthy volunteers.  
24 *Gastroenterology.* 2009;1):A726-A7.  
25
- 26 92. Koehler J, Feneberg W, Gorodetzky H, Meier M, Pollmann W. Clinical experiences with on-label  
27 nabiximols therapy in multiple sclerosis-induced spasticity. *Multiple Sclerosis.* 2013;1):281-2.  
28
- 29 93. Koehler J, Gorodetzky H, Pollmann W, Meier M, Feneberg W. Monotherapy with nabiximols in  
30 multiple sclerosis-induced spasticity. *Multiple Sclerosis.* 2013;1):282.  
31
- 32 94. Laux L, Devinsky O, Miller I, Nabbout R, Zolnowska M, Wright S, et al. Maintenance of long-term  
33 safety and efficacy of cannabidiol (CBD) treatment in dravet syndrome (DS): Results of the open-label  
34 extension (OLE) trial (GWPCARE5). *Annals of Neurology.* 2018;84 (Supplement 22):S344.  
35
- 36 95. Leehey M, Liu Y, Epstein C, Hart F, Bainbridge J, Cook M, et al. Open label study of cannabidiol in  
37 Parkinson's disease. *Movement Disorders.* 2017;32 (Supplement 2):913.  
38
- 39 96. Leehey MA, Liu Y, Hart F, Klawitter J, Sempio C, Fischer S, et al. Preliminary findings of the use of  
40 cannabis in Parkinson disease. *Movement Disorders.* 2019;34 (Supplement 1):S18-S9.  
41
- 42 97. Libzon S, Schleider LB, Saban N, Levit L, Tamari Y, Linder I, et al. Medical Cannabis for Pediatric  
43 Moderate to Severe Complex Motor Disorders. *Journal of Child Neurology.* 2018;33(9):565-71.  
44
- 45 98. Lindley EM, Razavi-Shearer D, Patel VV, Henry SE, McBeth Z, Burger EL, et al. Medical marijuana  
46 use characteristics in patients with chronic spine pain disorders. *Spine Journal.* 2013;1):84S.  
47
- 48 99. Lissoni P, Porro G, Messina G, Porta E, Rovelli F, Roselli MG, et al. Morphine, melatonin,  
49 Marijuana, Magnolia and MYRRH as the "five m" schedule in the treatment of cancer pain and the  
50 possible dose-dependency of the antitumor and analgesic effects of the pineal hormone melatonin.  
51 *Anticancer Research.* 2014;34 (10):6033-4.  
52
- 53 100. Lothe C. The painful truth. *Nursing Standard.* 1999;13(52):25.  
54  
55  
56  
57

- 1  
2  
3 101. Lockett T, Agar M, Chye R, Lintzeris N, McGregor I, Allsop D, et al. Medicinal cannabis use and  
4 preferred mode of administration: Preliminary results from an anonymous patient survey to inform  
5 medicinal cannabis phase II and III trials for cancer-related anorexia-cachexia. *Palliative Medicine*.  
6 2016;30 (6):NP88.  
7  
8 102. Macari D, Gbadamosi B, Ezekwudo D, Khoury J, Jaiyesimi IA, Gaikazian SS. Medical cannabis in  
9 cancer patients: Prevalence, efficacy, and safety. *Journal of Clinical Oncology Conference*.  
10 2019;37(Supplement 15).  
11  
12 103. Maggioli C, Giannone FA, Baldassarre M, Fanelli F, Mezzullo M, Belluomo I, et al.  
13 Endocannabinoids in advanced cirrhosis: Have we picked the right one? *Digestive and Liver Disease*.  
14 2012;1):S40.  
15  
16 104. Malfitano AM, Laezza C, D'Alessandro A, Procaccini C, Saccomanni G, Tuccinardi T, et al. Effects  
17 on immune cells of a new 1,8-naphthyridin-2-one derivative and its analogues as selective CB2 agonists:  
18 implications in multiple sclerosis. *PLoS ONE [Electronic Resource]*. 2013;8(5):e62511.  
19  
20 105. Martellucci I, Laera L, Lippi S, Marsili S, Petrioli R, Francini G. Impact of cannabinoids on the  
21 quality of life in oncology: Prospective observational study. *Annals of Oncology Conference: 17th*  
22 *National Congress of Medical Oncology Rome Italy Conference Publication*:. 2015;26(SUPPL. 6).  
23  
24 106. Mbachii C, Wang Y, Barkin JA, Demetria MV, Barkin JS, Kroner PT, et al. Does cannabis  
25 consumption impact chronic pancreatitis related complications? *American Journal of Gastroenterology*.  
26 2019;114 (Supplement):S21-S2.  
27  
28 107. Mc Vige J, Bargnes VH, Shukri S, Mechtler L. Cannabis, concussion, and chronic pain: An ongoing  
29 retrospective analysis at Dent Neurologic Institute in Buffalo, NY. *Neurology*. 2018;91 (23 Supplement  
30 1):S18-S9.  
31  
32 108. McLeod SA, Lemay JF. Medical cannabinoids. *CMAJ Canadian Medical Association Journal*.  
33 2017;189(30):E995.  
34  
35 109. McQuay HJ. More evidence cannabis can help in neuropathic pain. *CMAJ Canadian Medical*  
36 *Association Journal*. 2010;182(14):1494-5.  
37  
38 110. McVige J, Kaur D, Hart P, Lillis M, Mechtler L, Bargnes V, et al. Medical cannabis in the treatment  
39 of post-traumatic concussion. *Neurology Conference: 71st Annual Meeting of the American Academy of*  
40 *Neurology, AAN*. 2019;92(15 Supplement 1).  
41  
42 111. Mechtler L, Bargnes V, Hart P, McVige J, Saikali N. Medical cannabis for chronic migraine: A  
43 retrospective review. *Neurology Conference: 71st Annual Meeting of the American Academy of*  
44 *Neurology, AAN*. 2019;92(15 Supplement 1).  
45  
46 112. Mechtler L, Hart P, Bargnes V, Saikali N. Medical cannabis treatment in patients with trigeminal  
47 neuralgia. *Neurology Conference: 71st Annual Meeting of the American Academy of Neurology, AAN*.  
48 2019;92(15 Supplement 1).  
49  
50 113. Melen CM, Merrien M, Wasik A, Sonnevi K, Junlen HR, Christersson B, et al. A clinical trial of  
51 cannabis as targeted therapy for indolent leukemic lymphoma. *Blood Conference: 61st Annual Meeting*  
52 *of the American Society of Hematology, ASH*. 2019;134(Supplement 1).  
53  
54  
55  
56  
57  
58  
59  
60

- 1  
2  
3 114. Melen CM, Merrien M, Wasik AM, Sonnevi K, Junlen H, Christensson B, et al. The cannabinoid  
4 study-01: Investigating the effects of cannabinoids in indolent leukemic B-cell lymphoma. *Hematological*  
5 *Oncology*. 2019;37 (Supplement 2):572.  
6  
7 115. Mesquita B, Ferreira G, Corral LL, Riviera D, Pita A, Carrillo J, et al. Cannabinoids in the  
8 management of chronic GVHD - Experience of a center. *Bone Marrow Transplantation*. 2017;52  
9 (Supplement 1):233.  
10  
11 116. Messenheimer JA, O'Brien T, Berkovic S, French J, Bonn-Miller M, Gutterman D. Transdermal  
12 cannabidiol (CBD) gel for the treatment of focal epilepsy in adults. *Neurology*. 2018;90 (24):e2188.  
13  
14 117. Milstein SL, MacCannell K, Karr G, Clark S. Marijuana-produced changes in pain tolerance.  
15 Experienced and non-experienced subjects. *International pharmacopsychiatry*. 1975;10(3):177-82.  
16  
17 118. Miodownik H, Bradford C, Starrels JL, Ogu UO, Thomas M, Cunningham CO, et al. Clinical  
18 characteristics and health care utilization patterns of sickle cell disease patients using marijuana. *Blood*  
19 *Conference: 60th Annual Meeting of the American Society of Hematology, ASH*. 2018;132(Suppl. 1).  
20  
21 119. Mirman J. Why we need to legalize medical marijuana. One more potential therapy. *Minnesota*  
22 *Medicine*. 2014;97(4):38.  
23  
24 120. Moreno M, Vaillancourt R, Pouliot A, Sell E, Hevenor B, Viracoumarane K. A survey of the use of  
25 cannabis in children at a tertiary teaching hospital. *Canadian Journal of Hospital Pharmacy*. 2018;71  
26 (1):72.  
27  
28 121. Morera C. Palmitoylethanolamide (PEA) for sciatic pain associated to usual treatment. *Pain*  
29 *Practice*. 2012;1):88-9.  
30  
31 122. Morrison G, Sardu ML, Rasmussen CH, Sommerville K, Roberts C, Blakey GE. Exposure-response  
32 analysis of cannabidiol for the treatment of lennox-gastaut syndrome. *Epilepsia*. 2018;59 (Supplement  
33 3):S11-S2.  
34  
35 123. Morrison G, Sardu ML, Rasmussen CH, Sommerville K, Roberts C, Blakey GE. Exposure-Response  
36 Analysis of Cannabidiol (CBD) oral solution for the treatment of lennox-gastaut syndrome. *Neurology*  
37 *Conference: 70th Annual Meeting of the American Academy of Neurology, AAN*. 2018;90(15 Supplement  
38 1).  
39  
40 124. Mousa A, Petrovic M, Laszlo S, Fleshner N. Is there a therapeutic role for cannabis in advanced  
41 prostate cancer? Exploring the patterns and predictors of use among men receiving androgen-  
42 deprivation therapy. *Canadian Urological Association Journal*. 2018;12 (6 Supplement 2):S126.  
43  
44 125. Mupamombe CT, Nathan RA, Case AA, Walter M, Hansen E. Efficacy of medical cannabis for  
45 cancer-related pain in the elderly: A single-center retrospective analysis. *Journal of Clinical Oncology*  
46 *Conference*. 2019;37(31 Supplement 1).  
47  
48 126. Myers B, Geist T, Hart P, Aladeen T, Begley A, Westphal ES, et al. Medical cannabis in the  
49 treatment of parkinson's disease. *Neurology Conference: 71st Annual Meeting of the American*  
50 *Academy of Neurology, AAN*. 2019;92(15 Supplement 1).  
51  
52  
53  
54  
55  
56  
57  
58  
59  
60

- 1  
2  
3 127. Nadal X, Del Rio C, Casano S, Palomares B, Ferreiro-Vera C, Navarrete C, et al.  
4 Tetrahydrocannabinolic acid is a potent PPARgamma agonist with neuroprotective activity. *British*  
5 *Journal of Pharmacology*. 2017;174(23):4263-76.  
6  
7 128. Naftali T, Bar Lev Schlieder L, Hirsch J, Lish I, Benjaminov F, Konikoff F. Cannabis use patterns in  
8 patients with IBD. *Journal of Crohn's and Colitis*. 2016;10 (Supplement 1):S375-S6.  
9  
10 129. Naftali T, Bar Lev Schlieder L, Sklerovsky Benjaminov F, Lish I, Hirsch J, Konikoff FM. Cannabis  
11 induces clinical and endoscopic improvement in moderately active ulcerative colitis (UC). *Journal of*  
12 *Crohn's and Colitis*. 2018;12 (Supplement 1):S306.  
13  
14 130. Naftali T, Bar-Lev L, Gabay G, Chowers Y, Dotan I, Bronshtein M, et al. Tetrahydrocannabinol  
15 (THC) rich medical cannabis induces clinical and biochemical improvement with a steroid sparing effect  
16 in active crohn's disease. *Gastroenterology*. 2012;1):S780.  
17  
18 131. Naftali T, Barlev L, Gabay G, Chowers Y, Dotan I, Stein A, et al. Tetrahydrocannabinol (THC)  
19 induces clinical and biochemical improvement with a steroid sparing effect in active inflammatory bowel  
20 disease. *Journal of Crohn's and Colitis*. 2013;7 (SUPPL.1):S153.  
21  
22 132. Nathan RA, Tonderai C, Mupamombe, Walter M, Case AA, Hansen E. Use of medical cannabis in  
23 treating anorexia and nausea in elderly cancer patients. *Journal of Clinical Oncology Conference*.  
24 2019;37(31 Supplement 1).  
25  
26 133. Nauck F, Klaschik E. [Dronabinol (delta9-tetrahydrocannabinol) in long-term treatment.  
27 Symptom control in patients with multiple sclerosis and spasticity, neuropathic pain, loss of appetite and  
28 cachexia]. *Der Schmerz*. 2004;18 Suppl 2:S26-30.  
29  
30 134. Nct. Study to Evaluate the Efficacy of Dronabinol (Marinol) as Add-On Therapy for Patients on  
31 Opioids for Chronic Pain. <https://clinicaltrials.gov/show/NCT00153192>. 2005.  
32  
33 135. Nct. Medicinal Cannabis for Painful HIV Neuropathy.  
34 <https://clinicaltrials.gov/show/NCT00255580>. 2005.  
35  
36 136. Nct. Supporting Effect of Dronabinol on Behavioral Therapy in Fibromyalgia and Chronic Back  
37 Pain. <https://clinicaltrials.gov/show/NCT00176163>. 2005.  
38  
39 137. Nct. Nabilone Versus Amitriptyline in Improving Quality of Sleep in Patients With Fibromyalgia.  
40 <https://clinicaltrials.gov/show/NCT00381199>. 2006.  
41  
42 138. Nct. MUltiple Sclerosis and Extract of Cannabis (MUSEC) Study.  
43 <https://clinicaltrials.gov/show/NCT00552604>. 2007.  
44  
45 139. Nct. Efficacy and Safety Evaluation of Nabilone as Adjunctive Therapy to Gabapentin for the  
46 Management of Neuropathic Pain in Multiple Sclerosis. *Clinicaltrials gov, national institutes of health*  
47 [http://www clinicaltrials gov]. 2007.  
48  
49 140. Nct. A Study to Determine the Maintenance of Effect After Long-term Treatment of Sativex® in  
50 Subjects With Neuropathic Pain. <https://clinicaltrials.gov/show/NCT00713817>. 2008.  
51  
52 141. Nct. Prevention of Postoperative Nausea and Vomiting (PONV) in Surgical Patients.  
53 <https://clinicaltrials.gov/show/NCT00757822>. 2008.  
54  
55  
56  
57  
58  
59  
60



- 1  
2  
3 142. Nct. Sativex for Treatment of Chemotherapy Induced Neuropathic Pain.  
4 <https://clinicaltrials.gov/show/NCT00872144>. 2009.  
5  
6 143. Nct. Efficacy and Safety of the Pain Relieving Effect of Dronabinol in Central Neuropathic Pain  
7 Related to Multiple Sclerosis. Clinicaltrials gov, national institutes of health [[http://www.clinicaltrials](http://www.clinicaltrials.gov)  
8 gov]. 2009.  
9  
10 144. Nct. A Study of the Safety and Effectiveness of Sativex<sup>®</sup>, for the Relief of Symptoms of  
11 Spasticity in Subjects With Multiple Sclerosis (MS). Clinicaltrials gov, national institutes of health  
12 [<http://www.clinicaltrials.gov>]. 2010.  
13  
14 145. Nct. Palmitoylethanolamide for Post-operative Pain Prevention.  
15 <https://clinicaltrials.gov/show/NCT01491191>. 2011.  
16  
17 146. Nct. Efficacy Study of Δ9-THC to Treat Chronic Abdominal Pain.  
18 <https://clinicaltrials.gov/show/NCT01318369>. 2011.  
19  
20 147. Nct. Vaporized Cannabis and Spinal Cord Injury Pain.  
21 <https://clinicaltrials.gov/show/NCT01555983>. 2012.  
22  
23 148. Nct. Δ9-THC (Namisol<sup>®</sup>) in Chronic Pancreatitis Patients Suffering From Persistent Abdominal  
24 Pain. <https://clinicaltrials.gov/show/NCT01551511>. 2012.  
25  
26 149. Nct. A Study of Cannabis Based Medicine Extracts and Placebo in Patients With Pain Due to  
27 Spinal Cord Injury. <https://clinicaltrials.gov/show/NCT01606202>. 2012.  
28  
29 150. Nct. Safety and Efficacy Study of Dronabinol to Treat Obstructive Sleep Apnea.  
30 <https://clinicaltrials.gov/show/NCT01755091>. 2012.  
31  
32 151. Nct. Vaporized Cannabis for Chronic Pain Associated With Sickle Cell Disease.  
33 <https://clinicaltrials.gov/show/NCT01771731>. 2013.  
34  
35 152. Nct. Combined THC and CBD Drops for Treatment of Crohn's Disease.  
36 <https://clinicaltrials.gov/show/NCT01826188>. 2013.  
37  
38 153. Nct. Phase 1 Study to Study the Efficacy and Safety of Cannabis in the Treatment of Tinnitus.  
39 Clinicaltrials.gov [[www.clinicaltrials.gov](http://www.clinicaltrials.gov)]. 2013.  
40  
41 154. Nct. Safety and Efficacy of Nabilone in Alzheimer's Disease.  
42 <http://clinicaltrials.gov/show/NCT02351882>. 2014.  
43  
44 155. Nct. Cannabidiol Oral Solution as an Adjunctive Therapy for Treatment of Participants With  
45 Inadequately Controlled Dravet Syndrome. <https://clinicaltrials.gov/show/NCT02318563>. 2014.  
46  
47 156. Nct. Cannabidiol Oral Solution as an Adjunctive Therapy for Treatment of Participants With  
48 Inadequately Controlled Lennox-Gastaut Syndrome. <https://clinicaltrials.gov/show/NCT02318537>. 2014.  
49  
50 157. Nct. Cannabinoid Profile Investigation of Vapourized Cannabis in Patients With Osteoarthritis of  
51 the Knee. <https://clinicaltrials.gov/show/NCT02324777>. 2014.  
52  
53  
54  
55  
56  
57  
58  
59  
60

- 1  
2  
3 158. Nct. Investigation of Cannabinoid Receptor Agonist Dronabinol in Patients With Functional Chest  
4 Pain. <https://clinicaltrials.gov/show/NCT02569073>. 2015.  
5
- 6 159. Nct. The Safety, Tolerability and Efficacy of Dronabinol, for the Treatment of Nausea and  
7 Vomiting in Familial Dysautonomia. <https://clinicaltrials.gov/show/NCT02608931>. 2015.  
8
- 9 160. Nct. Trial of Dronabinol and Vaporized Cannabis in Neuropathic Low Back Pain.  
10 <https://clinicaltrials.gov/show/NCT02460692>. 2015.  
11
- 12 161. Nct. The Effects of Cannabis on Dystonia and Spasticity on Pediatric Patients.  
13 <https://clinicaltrials.gov/show/NCT02470325>. 2015.  
14
- 15 162. Nct. Evaluating Safety and Efficacy of Cannabis in Participants With Chronic Posttraumatic Stress  
16 Disorder. <https://clinicaltrials.gov/show/NCT02517424>. 2015.  
17
- 18 163. Nct. Nabilone Effect on the Attenuation of Anorexia, Nutritional Status and Quality of Life in  
19 Lung Cancer Patients. <https://clinicaltrials.gov/show/NCT02802540>. 2016.  
20
- 21 164. Nct. Cannabidiol Oral Solution for the Treatment of Subjects With Prader-Willi Syndrome.  
22 <https://clinicaltrials.gov/show/NCT02844933>. 2016.  
23
- 24 165. Nct. Investigation of Cannabis for Chronic Pain and Palliative Care.  
25 <https://clinicaltrials.gov/show/NCT02683018>. 2016.  
26
- 27 166. Nct. Effect of Cannabis and Endocannabinoids on HIV Neuropathic Pain.  
28 <https://clinicaltrials.gov/show/NCT03099005>. 2017.  
29
- 30 167. Nct. Cannabis Oil for Pain in Parkinson's Disease. <https://clinicaltrials.gov/show/NCT03639064>.  
31 2018.  
32
- 33 168. Nct. A Study to Assess the Efficacy, Safety, and Tolerability of Cannabidiol Oral Solution With  
34 Vigabatrin as Initial Therapy in Participants With Infantile Spasms.  
35 <https://clinicaltrials.gov/show/NCT03421496>. 2018.  
36
- 37 169. Nct. A Study to Examine the Efficacy of a Therapeutic THX-110 for Tourette Syndrome.  
38 <https://clinicaltrials.gov/show/NCT03651726>. 2018.  
39
- 40 170. Nct. Cannabis For Cancer-Related Symptoms. <https://clinicaltrials.gov/show/NCT03948074>.  
41 2019.  
42
- 43 171. Nct. A Phase 2a Study to Evaluate the Safety, Tolerability and Efficacy of Cannabidiol as a  
44 Steroid-sparing Therapy in Steroid-dependent Crohn's Disease Patients.  
45 <https://clinicaltrials.gov/show/NCT04056442>. 2019.  
46
- 47 172. Nct. Cannabinoids and an Anti-inflammatory Diet for the Treatment of Neuropathic Pain After  
48 Spinal Cord Injury. <https://clinicaltrials.gov/show/NCT04057456>. 2019.  
49
- 50 173. Nct. Efficacy and Safety of Dronabinol in the Improvement of Chemotherapy-induced and  
51 Tumor-related Symptoms in Advanced Pancreatic Cancer. <https://clinicaltrials.gov/show/NCT03984214>.  
52 2019.  
53  
54  
55  
56  
57  
58  
59  
60

- 1  
2  
3 174. Nct. Study to Investigate the Efficacy and Safety of Cannabis Oil for the Treatment of Subjects  
4 With Hidradenitis Suppurativa. <https://clinicaltrials.gov/show/NCT03929835>. 2019.  
5
- 6 175. Nct. Pain Response to Cannabidiol in Induced Acute Nociceptive Pain, Allodynia and  
7 Hyperalgesia By Using a Model Mimicking Acute Pain in Healthy Adults.  
8 <https://clinicaltrials.gov/show/NCT03985995>. 2019.  
9
- 10 176. Nct. Efficacy and Safety of Cannabidiol for Gastroparesis and Functional Dyspepsia.  
11 <https://clinicaltrials.gov/show/NCT03941288>. 2019.  
12
- 13 177. Ngan TYT, Litt M, Eguzo K, Thiel JA. Patient Outcomes Following Initiation of Medical Cannabis in  
14 Women with Chronic Pelvic Pain. *Journal of Minimally Invasive Gynecology*. 2019;26 (7  
15 Supplement):S89-S90.  
16
- 17 178. Nickels K. Cannabidiol in patients with intractable epilepsy due to TSC: A possible medication but  
18 not a miracle. *Epilepsy Currents*. 2017;17(2):91-2.  
19
- 20 179. Nicolodi M, Pinnaro MS, Sandoval V. Selected cannabinoids and cutaneous allodynia in chronic  
21 refractory migraine. *Journal of Headache and Pain Conference: 12th European Headache Federation*  
22 *Congress and the 32nd National Congress of the Italian Society for the Study of Headaches Italy*.  
23 2018;19(Supplement 1).  
24
- 25 180. Nicolodi M, Pinnaro MS, Sandoval V, Torrini A. Possible effects, side-effects and adverse events  
26 of a selective cannabinoid (6% THC/7.5% CBD) in refractory chronic migraine. 2013-2018 pilot data.  
27 *Journal of Headache and Pain Conference: 12th European Headache Federation Congress and the 32nd*  
28 *National Congress of the Italian Society for the Study of Headaches Italy*. 2018;19(Supplement 1).  
29
- 30 181. Nicolodi M, Sandoval V, Torrini A. Therapeutic use of cannabinoids-dose finding, effects and  
31 pilot data of effects in chronic migraine and cluster headache. *European Journal of Neurology*. 2017;24  
32 (Supplement 1):287.  
33
- 34 182. Nikles CJ, Yelland M, Glasziou PP, Del Mar C. Do individualized medication effectiveness tests (n-  
35 of-1 trials) change clinical decisions about which drugs to use for osteoarthritis and chronic pain?  
36 *American Journal of Therapeutics*. 2005;12(1):92-7.  
37
- 38 183. Notcutt W, Phillips C, Hughes J, Lacoux P, Vijayakulasingam V, Baldock L. A retrospective  
39 description of the use of nabilone in UK clinical practice. *Multiple Sclerosis*. 2014;1):468.  
40
- 41 184. Patel A, Gil-Nagel A, Chin R, Mitchell W, Perry MS, Weinstock A, et al. Long-term safety and  
42 efficacy of add-on cannabidiol (CBD) treatment in patients with lennox gastaut syndrome in an  
43 openlabel extension trial (GWPCARE5). *Neurology Conference: 71st Annual Meeting of the American*  
44 *Academy of Neurology, AAN*. 2019;92(15 Supplement 1).  
45
- 46 185. Patel A, Gil-Nagel A, Chin R, Mitchell W, Perry MS, Weinstock A, et al. Long-term safety and  
47 efficacy of add-on cannabidiol treatment in patients with Lennox Gastaut syndrome in an open-label  
48 extension trial (GWPCARE5). *Developmental Medicine and Child Neurology*. 2019;61 (Supplement 1):13.  
49
- 50 186. Patti F, Chisari C, D'Amico E, Solaro C, Arena S, Annunziata P, et al. Long-term effectiveness of 9-  
51 delta-tetrahydrocannabinol:Cannabidiol oromucosal spray in clinical practice: Results from a 18-months  
52  
53  
54  
55  
56  
57  
58  
59  
60

- 1  
2  
3 multicenter Italian study. *Neurology Conference: 71st Annual Meeting of the American Academy of*  
4 *Neurology, AAN.* 2019;92(15 Supplement 1).
- 5  
6 187. Patti F, Messina S, Amato MP, Benedetti MD, Bergamaschi R, Bertolotto A, et al. Multicenter,  
7 prospective, observational study aimed at evaluating SATivex efFEcts (effectiveness and tolerability) in a  
8 large population of Italian multiple sclerosis patients: SA.FE. Study. *Multiple Sclerosis.* 2015;1):613-5.
- 9  
10 188. Perello Alonso M, Ivanov P. [Pain, cannabis, psychosis. A logical sequence?]. *Revista Espanola de*  
11 *Geriatria y Gerontologia.* 2017;52(6):350-1.
- 12  
13 189. Pires C, Lachiewicz M. A pilot survey of marijuana use and self-reported benefit in women with  
14 chronic pelvic pain. *Pain Medicine (United States).* 2018;19 (4):890.
- 15  
16 190. Plummer R, Anthony A, Evans J, Haris N, D'Archangelo M, Slater S, et al. A phase I dose  
17 escalation study to assess the safety tolerability and pharmacokinetics of ETS2101 in patients (pts) with  
18 advanced solid tumours. *European Journal of Cancer.* 2015;3):S58-S9.
- 19  
20 191. Poli P, Salvadori C, Sannino C. Effects of cannabis based drugs on chronic neuropathic pain:  
21 Comparison between italian and dutch medical cannabis variety. *Pain Practice.* 2018;18 (Supplement  
22 1):101.
- 23  
24 192. Quintans JS, Antonioli AR, Almeida JR, Santana-Filho VJ, Quintans-Junior LJ. Natural products  
25 evaluated in neuropathic pain models - a systematic review. *Basic & Clinical Pharmacology & Toxicology.*  
26 2014;114(6):442-50.
- 27  
28 193. Reisfield GM. Medical cannabis and chronic opioid therapy. *Journal of Pain & Palliative Care*  
29 *Pharmacotherapy.* 2010;24(4):356-61.
- 30  
31 194. Reznik I. Post-traumatic stress disorder and medical cannabis use: A naturalistic observational  
32 study. *European Neuropsychopharmacology.* 2012;2):S363-S4.
- 33  
34 195. Reznik I. Medical marijuana/cannabis treatment of Tourette's syndrome: Focus on the quality of  
35 life. *European Neuropsychopharmacology.* 2014;2):S645-S6.
- 36  
37 196. Robinson D, Garti A, Yassin M. Cannabis treatment of diabetic neuropathy: Treatment effect and  
38 change in health over a 6 month period. *Foot and Ankle Surgery.* 2016;1):58.
- 39  
40 197. Ron A, Abuhasira R, Novack V. Establishment of a specialized geriatric clinic providing medical  
41 cannabis. *Journal of the American Geriatrics Society.* 2019;67 (Supplement 1):S299.
- 42  
43 198. Roy A, Konda M, Goel A, Sasapu A. Characteristics of marijuana usage in sickle cell patients.  
44 *Journal of Investigative Medicine.* 2020;68 (2):646.
- 45  
46 199. Roy AM, Konda M, Goel A, Sasapu A. Characteristics of marijuana usage in sickle cell patients: A  
47 nationwide analysis. *Blood Conference: 61st Annual Meeting of the American Society of Hematology,*  
48 *ASH.* 2019;134(Supplement 1).
- 49  
50 200. Russo EB, Killestein J, Uitdehaag BMJ, Polman CH. Safety, tolerability, and efficacy of orally  
51 administered cannabinoids in MS (multiple letters). *Neurology.* 2003;60(4):729-30.
- 52  
53  
54  
55  
56  
57  
58  
59  
60

- 1  
2  
3 201. Sacca F, Pane C, Carotenuto A, Massarelli M, Lanzillo R, Florio EB, et al. The use of medical-grade  
4 Cannabis (Bedrocan®) in patients non-responders to nabiximols (sativex®). Multiple sclerosis  
5 (houndmills, basingstoke, england). 2016;22:686-.
- 6  
7 202. Sallan S, Zinberg N, Frei E. Oral delta 9 tetrahydrocannabinol (THC) in the prevention of vomiting  
8 (V) associated with cancer chemotherapy (CC). Proceedings of the American Association for Cancer  
9 Research. 1975;16(66):No. 575.
- 10  
11 203. Sastre-Garriga J, Vila C, Clissold S, Montalban X. THC and CBD oromucosal spray (Sativex) in the  
12 management of spasticity associated with multiple sclerosis. Expert Review of Neurotherapeutics.  
13 2011;11(5):627-37.
- 14  
15 204. Saxon AJ, Browne KW. Marijuana not ready for prime time as an analgesic. General Hospital  
16 Psychiatry. 2014;36(1):4-6.
- 17  
18 205. Scheffer IE, Halford J, Nabbout R, Sanchez-Carpintero R, Shiloh Malawsky Y, Wong M, et al.  
19 Long-term safety and efficacy of add-on cannabidiol (CBD) treatment in patients with Dravet syndrome  
20 (DS) in an open-label extension (OLE) trial. Developmental Medicine and Child Neurology. 2019;61  
21 (Supplement 1):63.
- 22  
23 206. Schimpfoss M, Berweck S, Betzler C, Dotzler E, Herberhold T, Pringsheim M, et al. Retrospective  
24 analysis of tetrahydrocannabinol based on 31 neurologically critically ill children. Neuropediatrics  
25 Conference: 41st Annual Meeting of the Society of Neuropediatrics Switzerland. 2015;46(Supplement 1).
- 26  
27 207. Schorn M, Krashin D, Mannava A, Belaskova S, Murinova N. Marijuana use in headache in a  
28 university-based headache clinic. Neurology Conference: 71st Annual Meeting of the American Academy  
29 of Neurology, AAN. 2019;92(15 Supplement 1).
- 30  
31 208. Seibert SM, Kumar P, Gomez PL, Gomez CN, Miller LM, Logsdon M. Cannabis in cancer patients  
32 [CP] to improve quality of life [QOL] and cancer related symptoms [CRS]: Illinois cancer care cannabis  
33 education and clinical analysis. Journal of Clinical Oncology Conference. 2018;36(15 Supplement 1).
- 34  
35 209. Shipton EA, Shipton EE. Should doctors be allowed to prescribe cannabinoids for pain in  
36 Australia and New Zealand? Australian & New Zealand Journal of Psychiatry. 2014;48(4):310-3.
- 37  
38 210. Slaven M, Levine M, Parpia S, Shaw E. An approach to dosing: The cannabis oil in pain  
39 effectiveness (COPE) trial. Medical Cannabis and Cannabinoids. 2019;2 (2):2.
- 40  
41 211. Spittel S, Funke A, Kettemann D, Maier A, Gajewski N, Baldes T, et al. Patients' satisfaction and  
42 usability for tetrahydrocannabinol/cannabidiol (THC:CBD) in the treatment of spasticity in patients with  
43 amyotrophic lateral sclerosis (ALS). Amyotrophic Lateral Sclerosis and Frontotemporal Degeneration.  
44 2018;19 (Supplement 1):376.
- 45  
46 212. Stern P, Roberts L. The future of pain research. Science. 2016;354(6312):564-5.
- 47  
48 213. Sutton IR, Daeninck P. Cannabinoids in the management of intractable chemotherapy-induced  
49 nausea and vomiting and cancer-related pain. The Journal of Supportive Oncology. 2006;4(10):531-5.
- 50  
51  
52  
53  
54  
55  
56  
57  
58  
59  
60

- 1  
2  
3 214. Szaflarski JP, Bebin EM, Gaston T, Grayson L, Liu Y, Cutter G, et al. Improvements in seizure  
4 frequency parallel improvements in seizure severity in an open label study of cannabidiol. *Epilepsia*.  
5 2017;58 (Supplement 5):S158.  
6
- 7 215. Taha T, Meiri D, Talhamy S, Wollner M, Peer A, Bar-Sela G. Cannabis Impacts Tumor Response  
8 Rate to Nivolumab in Patients with Advanced Malignancies. *Oncologist*. 2019;24(4):549-54.  
9
- 10 216. Thirlwell C, Rainville K, Miri D, Donath A, Shulman H. New frontiers in treating chronic insomnia  
11 in Canadian veterans with PTSD: Retrospective analysis reveals an innovative role for medical cannabis  
12 in optimizing sleep/wake health. *Medical Cannabis and Cannabinoids*. 2018;1 (2):126.  
13
- 14 217. Tripp D, Nickel JC, Laura K, Ginting JV, Mark W, Santor D. Cannabis (marijuana) use in men with  
15 chronic prostatitis / chronic pelvic pain syndrome. *Journal of Urology*. 2012;1):e439-e40.  
16
- 17 218. Trojano M. THC:CBD Observational Study Data: Evolution of Resistant MS Spasticity and  
18 Associated Symptoms. *European Neurology*. 2016;75 Suppl 1:4-8.  
19
- 20 219. Vermersch P, Trojano M. Tetrahydrocannabinol + cannabidiol oromucosal spray for multiple  
21 sclerosis resistant spasticity on daily practice, new data. *Multiple Sclerosis*. 2016;22 (Supplement 3):377.  
22
- 23 220. Vezyroglou K, Eltze C, Varadkar S, Carr L, O'Sullivan C, Ninnis E, et al. Efficacy and safety of  
24 cannabidiol as add-on therapy in drugresistant epilepsy, a single center experience. *European Journal of*  
25 *Paediatric Neurology*. 2017;21 (Supplement 1):e87.  
26
- 27 221. Vezyroglou K, Eltze C, Varadkar S, Carr L, Sullivan CO, Ninnis E, et al. Cannabidiol as add on  
28 therapy in children with complex epilepsy. *Developmental Medicine and Child Neurology*. 2017;59  
29 (Supplement 1):17.  
30
- 31 222. Voelker R. States Move to Substitute Opioids With Medical Marijuana to Quell Epidemic. *JAMA*.  
32 2018;320(23):2408-10.  
33
- 34 223. Vorobeichik L, Bhatia A, Buzon-Tan A, Walker S, Kirkham K, Ilangomaran D, et al. Risk factors for  
35 failure of Patient-Controlled Oral Analgesia after total hip and knee arthroplasty. *Regional Anesthesia*  
36 *and Pain Medicine Conference: 42nd Annual Regional Anesthesiology and Acute Pain Medicine Meeting,*  
37 *ASRA*. 2017;42(6).  
38
- 39 224. Webb CW, Webb SM. Therapeutic benefits of cannabis: a patient survey. *Hawai'i Journal of*  
40 *Medicine & Public Health : A Journal of Asia Pacific Medicine & Public Health*. 2014;73(4):109-11.  
41
- 42 225. Werth VP, Hejazi E, Pena S, Haber J, Feng R, Patel B, et al. Study of safety and efficacy of  
43 lenabasum, a cannabinoid receptor type 2 agonist, in refractory skin-predominant dermatomyositis.  
44 *Journal of Investigative Dermatology*. 2018;138 (5 Supplement 1):S103.  
45
- 46 226. Wilsey B, Marcotte T, Deutsch R, Gouaux B, Sakai S, Donaghe H. Low-dose vaporized cannabis  
47 significantly improves neuropathic pain. *Journal of Pain*. 2013;14(2):136-48.  
48
- 49 227. Wilsey B, Marcotte T, Tsodikov A, Millman J, Bentley H, Gouaux B, et al. A randomized, placebo-  
50 controlled, crossover trial of cannabis cigarettes in neuropathic pain. *Journal of Pain*. 2008;9(6):506-21.  
51
- 52 228. Wilson M, Masterson E, Broglio K. Cannabis Use Among Patients Prescribed Opioids in a  
53 Palliative Care Clinic (S875). *Journal of Pain and Symptom Management*. 2019;57 (2):522.  
54  
55  
56  
57  
58  
59  
60

- 1  
2  
3 229. Wilson MM, Masterson E, Broglio K. Cannabis Use among Patients in a Rural Academic Palliative  
4 Care Clinic. *Journal of Palliative Medicine*. 2019;22(10):1224-6.  
5  
6 230. Wirrell E, Privitera M, Bhathal H, Wong M, Cross J, Sommerville K. Cannabidiol (CBD) treatment  
7 effect and adverse events (AES) by time in patients with lennox-gastaut syndrome (LGS): Pooled results  
8 from 2 trials. *Annals of Neurology*. 2018;84 (Supplement 22):S341.  
9  
10 231. Wright S, Etges T. An observational post approval registry study of patients prescribed Sativex.  
11 Results from clinical practice. (#14). *Multiple Sclerosis*. 2012;18 (5):S30.  
12  
13 232. Xu JJ, Diaz P, Astruc-Diaz F, Craig S, Munoz E, Naguib M. Pharmacological characterization of a  
14 novel cannabinoid ligand, MDA19, for treatment of neuropathic pain. *Anesthesia & Analgesia*.  
15 2010;111(1):99-109.  
16  
17 233. Zajicek J. Cannabinoids on trial for multiple sclerosis. *Lancet Neurology*. 2002;1(3):147.  
18  
19 234. Zajicek JP, Hobart JC, Slade A, Barnes D, Mattison PG, Group MR. Multiple sclerosis and extract  
20 of cannabis: results of the MUSEC trial. *Journal of Neurology, Neurosurgery & Psychiatry*.  
21 2012;83(11):1125-32.  
22  
23 235. Zajicek JP, Sanders HP, Wright DE, Vickery PJ, Ingram WM, Reilly SM, et al. Cannabinoids in  
24 multiple sclerosis (CAMS) study: safety and efficacy data for 12 months follow up. *Journal of Neurology,*  
25 *Neurosurgery & Psychiatry*. 2005;76(12):1664-9.  
26  
27 236. Zettl U, Henze T, Pfiffner C, Vila Silvan C, Flachenecker P. Effectiveness of Sativex in multiple  
28 sclerosis spasticity. First data from a large observational study in Germany. *Multiple Sclerosis*.  
29 2012;1):246.  
30  
31 237. Zettl UK, Rommer P, Hipp P, Patejdl R. Evidence for the efficacy and effectiveness of THC-CBD  
32 oromucosal spray in symptom management of patients with spasticity due to multiple sclerosis.  
33 *Therapeutic Advances in Neurological Disorders*. 2016;9(1):9-30.  
34  
35 238. Zhou R, Jacobson C, Weng J, Cheng E, Lay J, Hung P, et al. Potential efficacy of cannabidiol for  
36 treatment of refractory infantile spasms and lennox gastaut syndrome. *Epilepsy Currents*. 2015;1):360-1.  
37  
38 239. Ziemssen T. Tetrahydrocannabinol: Cannabidiol oromucosal spray for treating symptoms of  
39 multiple sclerosis spasticity: Newest evidence. *Neurodegenerative Disease Management*. 2019;9(2s):1-2.  
40  
41  
42

#### 43 **Study did not include patients with chronic pain**

- 44  
45 1. Abuhasira R, Ron A, Sikorin I, Novack V. Medical cannabis for older patients-treatment protocol  
46 and initial results. *Journal of Clinical Medicine*. 2019;8 (11) (no pagination)(1819).  
47  
48 2. Adejumo AC, Adegbala OM, Adejumo KL, Bukong TN. Reduced Incidence and Better Liver  
49 Disease Outcomes among Chronic HCV Infected Patients Who Consume Cannabis. *Canadian Journal of*  
50 *Gastroenterology and Hepatology*. 2018;2018 (no pagination)(9430953).  
51  
52 3. Allen D. Dronabinol Therapy: Central Nervous System Adverse Events in Adults With Primary  
53 Brain Tumors. *Clinical Journal of Oncology Nursing*. 2019;23(1):23-6.  
54  
55  
56  
57  
58  
59  
60

- 1  
2  
3 4. Balash Y, Bar-Lev Schleider L, Korczyn AD, Shabtai H, Knaani J, Rosenberg A, et al. Medical  
4 Cannabis in Parkinson Disease: Real-Life Patients' Experience. *Clinical Neuropharmacology*.  
5 2017;40(6):268-72.  
6
- 7 5. Bar-Lev Schleider L, Mechoulam R, Lederman V, Hilou M, Lencovsky O, Betzalel O, et al.  
8 Prospective analysis of safety and efficacy of medical cannabis in large unselected population of patients  
9 with cancer. *European Journal of Internal Medicine*. 2018;49:37-43.  
10
- 11 6. Bar-Sela G, Vorobeichik M, Drawsheh S, Omer A, Goldberg V, Muller E. The medical necessity for  
12 medicinal cannabis: prospective, observational study evaluating the treatment in cancer patients on  
13 supportive or palliative care. *Evidence-Based Complementary & Alternative Medicine: eCAM*.  
14 2013;2013:510392.  
15
- 16 7. Beal JE, Olson R, Lefkowitz L, Laubenstein L, Bellman P, Yangco B, et al. Long-term efficacy and  
17 safety of dronabinol for acquired immunodeficiency syndrome-associated anorexia. *Journal of Pain &*  
18 *Symptom Management*. 1997;14(1):7-14.  
19
- 20 8. Bobitt J, Qualls SH, Schuchman M, Wickersham R, Lum HD, Arora K, et al. Qualitative Analysis of  
21 Cannabis Use Among Older Adults in Colorado. *Drugs & Aging*. 2019;36(7):655-66.  
22
- 23 9. Bouso JC, Jimenez-Garrido D, Ona G, Woznica D, Dos Santos RG, Hallak JEC, et al. Quality of Life,  
24 Mental Health, Personality and Patterns of Use in Self-Medicated Cannabis Users with Chronic Diseases:  
25 A 12-Month Longitudinal Study. *Phytotherapy Research*. 2020;21:21.  
26
- 27 10. Boyd CJ, Veliz PT, McCabe SE. Adolescents' Use of Medical Marijuana: A Secondary Analysis of  
28 Monitoring the Future Data. *Journal of Adolescent Health*. 2015;57(2):241-4.  
29
- 30 11. Bruce D, Brady JP, Foster E, Shattell M. Preferences for Medical Marijuana over Prescription  
31 Medications Among Persons Living with Chronic Conditions: Alternative, Complementary, and Tapering  
32 Uses. *Journal of Alternative & Complementary Medicine*. 2018;24(2):146-53.  
33
- 34 12. Cameron C, Watson D, Robinson J. Use of a synthetic cannabinoid in a correctional population  
35 for posttraumatic stress disorder-related insomnia and nightmares, chronic pain, harm reduction, and  
36 other indications: a retrospective evaluation. *Journal of Clinical Psychopharmacology*. 2014;34(5):559-  
37 64.  
38
- 39 13. Carlini BH, Garrett SB, Carter GT. Medicinal Cannabis: A Survey Among Health Care Providers in  
40 Washington State. *The American journal of hospice & palliative care*. 2017;34(1):85-91.  
41
- 42 14. Chen KA, Farrar M, Cardamone M, Gill D, Smith R, Cowell CT, et al. Cannabidiol for treating drug-  
43 resistant epilepsy in children: the New South Wales experience. *Medical Journal of Australia*.  
44 2018;209(5):217-21.  
45
- 46 15. Choi NG, DiNitto DM, Marti CN. Nonmedical versus medical marijuana use among three age  
47 groups of adults: Associations with mental and physical health status. *American Journal on Addictions*.  
48 2017;26(7):697-706.  
49
- 50 16. Clark AJ, Ware MA, Yazer E, Murray TJ, Lynch ME. Patterns of cannabis use among patients with  
51 multiple sclerosis. *Neurology*. 2004;62(11):2098-100.  
52  
53  
54  
55  
56  
57  
58  
59  
60



17. Darke S, Duflou J, Farrell M, Peacock A, Lappin J. Characteristics and circumstances of synthetic cannabinoid-related death. *Clinical Toxicology: The Official Journal of the American Academy of Clinical Toxicology & European Association of Poisons Centres & Clinical Toxicologists*. 2019;1-7.
18. Davies BH, Weatherstone RM, Graham JDP, Griffiths RD. A pilot study of orally administered DELTA trans tetrahydrocannabinol in the management of patients undergoing radiotherapy for carcinoma of the bronchus. *BritJClinPharmacol*. 1974;1(4):301-6.
19. Devinsky O, Marsh E, Friedman D, Thiele E, Laux L, Sullivan J, et al. Cannabidiol in patients with treatment-resistant epilepsy: an open-label interventional trial. *Lancet Neurology*. 2016;15(3):270-8.
20. Devinsky O, Marsh E, Friedman D, Thiele E, Laux L, Sullivan J, et al. "Cannabidiol in patients with treatment-resistant epilepsy: An open-label interventional trial": Corrections. *The Lancet Neurology*. 2016;15(4):352.
21. Ebrahimi-Fakhari D, Agricola KD, Tudor C, Krueger D, Franz DN. Cannabidiol Elevates Mechanistic Target of Rapamycin Inhibitor Levels in Patients With Tuberous Sclerosis Complex. *Pediatric Neurology*. 2020;105:59-61.
22. Etges T, Karolia K, Grint T, Taylor A, Lauder H, Daka B, et al. An observational postmarketing safety registry of patients in the UK, Germany, and Switzerland who have been prescribed Sativex (THC: CBD, nabiximols) oromucosal spray. *Therapeutics and Clinical Risk Management*. 2016;12:1667-75.
23. Felix-Ukwu F, Reichert K, Bernhardt MB, Schafer ES, Berger A. Evaluation of aprepitant for acute chemotherapy-induced nausea and vomiting in children and adolescents with acute lymphoblastic leukemia receiving high-dose methotrexate. *Pediatric Blood and Cancer*. 2018;65 (2) (no pagination)(e26857).
24. Ferre L, Nuara A, Pavan G, Radaelli M, Moiola L, Rodegher M, et al. Efficacy and safety of nabiximols (Sativex) on multiple sclerosis spasticity in a real-life Italian monocentric study. *Neurological Sciences*. 2016;37(2):235-42.
25. Flachenecker P, Henze T, Zettl UK. Nabiximols (THC/CBD Oromucosal Spray, Sativex) in clinical practice - results of a multicenter, non-interventional study (MOVE 2) in patients with multiple sclerosis spasticity. *European Neurology*. 2014;71(5-6):271-9.
26. Freeman JL. Safety of cannabidiol prescribed for children with refractory epilepsy. *Medical Journal of Australia*. 2018;209(5):228-9.
27. Gazibara T, Prpic M, Maric G, Pekmezovic T, Kistic-Tepavcevic D. Medical Cannabis in Serbia: The Survey of Knowledge and Attitudes in an Urban Adult Population. *Journal of Psychoactive Drugs*. 2017;49(3):217-24.
28. Gorter RW, Butorac M, Cobian EP, van der Sluis W. Medical use of cannabis in the Netherlands. *Neurology*. 2005;64(5):917-9.
29. Goulet-Stock S, Rueda S, Vafaei A, Ialomiteanu A, Manthey J, Rehm J, et al. Comparing Medical and Recreational Cannabis Users on Socio-Demographic, Substance and Medication Use, and Health and Disability Characteristics. *European Addiction Research*. 2017;23(3):129-35.

- 1  
2  
3 30. Grella CE, Rodriguez L, Kim T. Patterns of medical marijuana use among individuals sampled  
4 from medical marijuana dispensaries in los angeles. *Journal of Psychoactive Drugs*. 2014;46(4):267-75.  
5
- 6 31. Gulbransen G, Xu W, Arroll B. Cannabidiol prescription in clinical practice: an audit on the first  
7 400 patients in New Zealand. *Bjgp Open*. 2020;04:04.  
8
- 9 32. Hausman-Kedem M, Menascu S, Kramer U. Efficacy of CBD-enriched medical cannabis for  
10 treatment of refractory epilepsy in children and adolescents - An observational, longitudinal study. *Brain*  
11 & *Development*. 2018;40(7):544-51.  
12
- 13 33. Hermanns-Clausen M, Kneisel S, Szabo B, Auwarter V. Acute toxicity due to the confirmed  
14 consumption of synthetic cannabinoids: clinical and laboratory findings. *Addiction*. 2013;108(3):534-44.  
15
- 16 34. Hight BH, Lesser ER, Johnson PW, Kaur JS. Tetrahydrocannabinol and Cannabidiol Use in an  
17 Outpatient Palliative Medicine Population. *American Journal of Hospice & Palliative Medicine*.  
18 2020:1049909119900378.  
19
- 20 35. Hussain SA, Zhou R, Jacobson C, Weng J, Cheng E, Lay J, et al. Perceived efficacy of cannabidiol-  
21 enriched cannabis extracts for treatment of pediatric epilepsy: A potential role for infantile spasms and  
22 Lennox-Gastaut syndrome. *Epilepsy & Behavior*. 2015;47:138-41.  
23
- 24 36. Johnson-Sasso CP, Tompkins C, Kao DP, Walker LA. Marijuana use and short-term outcomes in  
25 patients hospitalized for acute myocardial infarction. *PLoS ONE*. 2018;13 (7) (no pagination)(e0199705).  
26
- 27 37. Khelemsky Y, Goldberg AT, Hurd YL, Winkel G, Ninh A, Qian L, et al. Perioperative Patient Beliefs  
28 Regarding Potential Effectiveness of Marijuana (Cannabinoids) for Treatment of Pain: A Prospective  
29 Population Survey. *Regional Anesthesia & Pain Medicine*. 2017;42(5):652-9.  
30
- 31 38. Klotz KA, Grob D, Hirsch M, Metternich B, Schulze-Bonhage A, Jacobs J. Efficacy and Tolerance of  
32 Synthetic Cannabidiol for Treatment of Drug Resistant Epilepsy. *Frontiers in Neurology*. 2019;10 (no  
33 pagination)(1313).  
34
- 35 39. Koehler J, Feneberg W, Meier M, Pollmann W. Clinical experience with THC:CBD oromucosal  
36 spray in patients with multiple sclerosis-related spasticity. *International Journal of Neuroscience*.  
37 2014;124(9):652-6.  
38
- 39 40. Kolansky H, Moore WT. Toxic effects of chronic marihuana use. *JAMA*. 1972;222(1):35-41.  
40
- 41 41. Krcevski-Skvarc N, Wells C, Hauser W. Availability and approval of cannabis-based medicines for  
42 chronic pain management and palliative/supportive care in Europe: A survey of the status in the  
43 chapters of the European Pain Federation. *European Journal of Pain*. 2018;22(3):440-54.  
44
- 45 42. Lagae L, Schoonjans AS, Gammaitoni AR, Galer BS, Ceulemans B. A pilot, open-label study of the  
46 effectiveness and tolerability of low-dose ZX008 (fenfluramine HCl) in Lennox-Gastaut syndrome.  
47 *Epilepsia*. 2018;59(10):1881-8.  
48
- 49 43. Laux LC, Bebin EM, Checketts D, Chez M, Flamini R, Marsh ED, et al. Long-term safety and  
50 efficacy of cannabidiol in children and adults with treatmentresistant Lennox-Gastaut syndrome or  
51 Dravet syndrome: Expanded access program results. *Epilepsy Research*. 2019;154:13-20.  
52  
53  
54  
55  
56  
57  
58  
59  
60

- 1  
2  
3 44. Leconte M, Nicco C, Ngo C, Arkwright S, Chereau C, Guibourdenche J, et al. Antiproliferative  
4 effects of cannabinoid agonists on deep infiltrating endometriosis. *American Journal of Pathology*.  
5 2010;177(6):2963-70.  
6
- 7 45. Liebrechts N, Benschop A, van der Pol P, Van Laar M, De Graaf R, Van den Brink W, et al. Cannabis  
8 dependence and peer selection in social networks of frequent users. *Contemporary Drug Problems: An*  
9 *Interdisciplinary Quarterly*. 2011;38(1):93-120.  
10
- 11 46. Lim M, Kirchhof MG. Dermatology-Related Uses of Medical Cannabis Promoted by Dispensaries  
12 in Canada, Europe, and the United States. *Journal of Cutaneous Medicine & Surgery*. 2019;23(2):178-84.  
13
- 14 47. Lorente Fernandez L, Monte Boquet E, Perez-Miralles F, Gil Gomez I, Escutia Roig M, Bosca  
15 Blasco I, et al. Clinical experiences with cannabinoids in spasticity management in multiple sclerosis.  
16 [Spanish]. *Neurologia*. 2014;29(5):257-60.  
17
- 18 48. Lockett T, Phillips J, Lintzeris N, Allsop D, Lee J, Solowij N, et al. Clinical trials of medicinal  
19 cannabis for appetite-related symptoms from advanced cancer: a survey of preferences, attitudes and  
20 beliefs among patients willing to consider participation. *Internal Medicine Journal*. 2016;46(11):1269-75.  
21
- 22 49. Marcellin F, Lions C, Rosenthal E, Roux P, Sogni P, Wittkop L, et al. No significant effect of  
23 cannabis use on the count and percentage of circulating CD4 T-cells in HIV-HCV co-infected patients  
24 (ANRS CO13-HEPAVIH French cohort). *Drug & Alcohol Review*. 2017;36(2):227-38.  
25
- 26 50. McCabe SE, West BT, Veliz P, Frank KA, Boyd CJ. Social contexts of substance use among U.S.  
27 high school seniors: A multicohort national study. *Journal of Adolescent Health*. 2014;55(6):842-4.  
28
- 29 51. Michalski CW, Laukert T, Sauliunaite D, Pacher P, Bergmann F, Agarwal N, et al. Cannabinoids  
30 ameliorate pain and reduce disease pathology in cerulein-induced acute pancreatitis. *Gastroenterology*.  
31 2007;132(5):1968-78.  
32
- 33 52. Milloy MJ, Marshall B, Kerr T, Richardson L, Hogg R, Guillemi S, et al. High-intensity cannabis use  
34 associated with lower plasma human immunodeficiency virus-1 RNA viral load among recently infected  
35 people who use injection drugs. *Drug & Alcohol Review*. 2015;34(2):135-40.  
36
- 37 53. Mitelpunkt A, Kramer U, Hausman Kedem M, Zilbershot Fink E, Orbach R, Chernuha V, et al. The  
38 safety, tolerability, and effectiveness of PTL-101, an oral cannabidiol formulation, in pediatric intractable  
39 epilepsy: A phase II, open-label, single-center study. *Epilepsy and Behavior*. 2019;Part A. 98:233-7.  
40
- 41 54. Mousa A, Petrovic M, Fleshner NE. Prevalence and predictors of cannabis use among men  
42 receiving androgen-deprivation therapy for advanced prostate cancer. *Canadian Urological Association*  
43 *Journal*. 2020;14(1):E20-E6.  
44
- 45 55. Nordmann S, Vilotitch A, Roux P, Esterle L, Spire B, Marcellin F, et al. Daily cannabis and reduced  
46 risk of steatosis in human immunodeficiency virus and hepatitis C virus-co-infected patients (ANRS  
47 CO13-HEPAVIH). *Journal of Viral Hepatitis*. 2018;25(2):171-9.  
48
- 49 56. Notcutt WG. A questionnaire survey of patients and carers of patients prescribed Sativex as an  
50 unlicensed medicine. *Primary Health Care Research & Development*. 2013;14(2):192-9.  
51  
52  
53  
54  
55  
56  
57  
58  
59  
60

- 1  
2  
3 57. Novotna A, Mares J, Ratcliffe S, Novakova I, Vachova M, Zapletalova O, et al. A randomized,  
4 double-blind, placebo-controlled, parallel-group, enriched-design study of nabiximols (Sativex( R ) ), as  
5 add-on therapy, in subjects with refractory spasticity caused by multiple sclerosis. *European Journal of*  
6 *Neurology*. 2011;18(9):1122-31.
- 7  
8 58. Ofir R, Bar-Sela G, Weyl Ben-Arush M, Postovsky S. Medical marijuana use for pediatric oncology  
9 patients: single institution experience. *Pediatric Hematology & Oncology*. 2019;36(5):255-66.
- 10  
11 59. Palmieri B, Laurino C, Vadala M. A therapeutic effect of cbd-enriched ointment in inflammatory  
12 skin diseases and cutaneous scars. *Clinica Terapeutica*. 2019;170(2):e93-e9.
- 13  
14 60. Paolicelli D, Drenzo V, Manni A, D'Onghia M, Tortorella C, Zoccolella S, et al. Long-Term Data of  
15 Efficacy, Safety, and Tolerability in a Real-Life Setting of THC/CBD Oromucosal Spray-Treated Multiple  
16 Sclerosis Patients. *Journal of Clinical Pharmacology*. 2016;56(7):845-51.
- 17  
18 61. Patel VP, Feinstein A. Cannabis and cognitive functioning in multiple sclerosis: The role of  
19 gender. *Multiple Sclerosis Journal Experimental Translational & Clinical*. 2017;3(2):2055217317713027.
- 20  
21 62. Patti F. Health Authorities Data Collection of THC:CBD Oromucosal Spray (L'Agenzia Italiana del  
22 Farmaco Web Registry): Figures after 1.5 Years. *European Neurology*. 2016;75 Suppl 1:9-12.
- 23  
24 63. Patti F, Messina S, Solaro C, Amato MP, Bergamaschi R, Bonavita S, et al. Efficacy and safety of  
25 cannabinoid oromucosal spray for multiple sclerosis spasticity. *Journal of Neurology, Neurosurgery &*  
26 *Psychiatry*. 2016;87(9):944-51.
- 27  
28 64. Pavisian B, MacIntosh BJ, Szilagyi G, Staines RW, O'Connor P, Feinstein A. Effects of cannabis on  
29 cognition in patients with MS: a psychometric and MRI study. *Neurology*. 2014;82(21):1879-87.
- 30  
31 65. Punzo F, Tortora C, Di Pinto D, Pota E, Argenziano M, Di Paola A, et al. Bortezomib and  
32 endocannabinoid/endovanilloid system: a synergism in osteosarcoma. *Pharmacological Research*.  
33 2018;137:25-33.
- 34  
35 66. Purcell C, Davis A, Moolman N, Taylor SM. Reduction of Benzodiazepine Use in Patients  
36 Prescribed Medical Cannabis. *Cannabis and Cannabinoid Research*. 2019;4(3):214-8.
- 37  
38 67. Radke PM, Mokhtarzadeh A, Lee MS, Harrison AR. Medical Cannabis, a Beneficial High in  
39 Treatment of Blepharospasm? An Early Observation. *Neuro-Ophthalmology*. 2017;41(5):253-8.
- 40  
41 68. Romero K, Pavisian B, Staines WR, Feinstein A. Multiple sclerosis, cannabis, and cognition: A  
42 structural MRI study. *NeuroImage Clinical*. 2015;8:140-7.
- 43  
44 69. Russo M, Calabro RS, Naro A, Sessa E, Rifichi C, D'Aleo G, et al. Sativex in the Management of  
45 Multiple Sclerosis-Related Spasticity: Role of the Corticospinal Modulation. *Neural Plasticity*. 2015;2015  
46 (no pagination)(656582).
- 47  
48 70. Sarnelli G, D'Alessandro A, Iuvone T, Capoccia E, Gigli S, Pesce M, et al. Palmitoylethanolamide  
49 Modulates Inflammation-Associated Vascular Endothelial Growth Factor (VEGF) Signaling via the  
50 Akt/mTOR Pathway in a Selective Peroxisome Proliferator-Activated Receptor Alpha (PPAR-alpha)-  
51 Dependent Manner. *PLoS ONE [Electronic Resource]*. 2016;11(5):e0156198.
- 52  
53  
54  
55  
56  
57  
58  
59  
60

- 1
- 2
- 3 71. Savage TE, Sourbron J, Bruno PL, Skirvin LA, Wolper ES, Anagnos CJ, et al. Efficacy of cannabidiol
- 4 in subjects with refractory epilepsy relative to concomitant use of clobazam. *Epilepsy Research*.
- 5 2020;160 (no pagination)(106263).
- 6
- 7 72. Schabas AJ, Vukojevic V, Taylor C, Thu Z, Badyal A, Chan JK, et al. Cannabis-based product use in
- 8 a multiple sclerosis cohort. *Multiple Sclerosis Journal Experimental Translational & Clinical*.
- 9 2019;5(3):2055217319869360.
- 10
- 11 73. Stillman M, Capron M, Mallow M, Ransom T, Gustafson K, Bell A, et al. Utilization of medicinal
- 12 cannabis for pain by individuals with spinal cord injury. *Spinal Cord Series and Cases*. 2019;5:66.
- 13
- 14 74. Swift W, Gates P, Dillon P. Survey of Australians using cannabis for medical purposes. *Harm*
- 15 *Reduction Journal*. 2005;2:18.
- 16
- 17 75. Sylvestre DL, Clements BJ, Malibu Y. Cannabis use improves retention and virological outcomes
- 18 in patients treated for hepatitis C. *European Journal of Gastroenterology & Hepatology*.
- 19 2006;18(10):1057-63.
- 20
- 21 76. Tyree GA, Sarkar R, Bellows BK, Ellis RJ, Atkinson JH, Marcotte TD, et al. A Cost-Effectiveness
- 22 Model for Adjunctive Smoked Cannabis in the Treatment of Chronic Neuropathic Pain. *Cannabis and*
- 23 *Cannabinoid Research*. 2019;4(1):62-72.
- 24
- 25 77. Vermersch P, Trojano M. Tetrahydrocannabinol:Cannabidiol Oromucosal Spray for Multiple
- 26 Sclerosis-Related Resistant Spasticity in Daily Practice. *European Neurology*. 2016;76(5-6):216-26.
- 27
- 28 78. Vidot DC, Lerner B, Gonzalez R. Cannabis Use, Medication Management and Adherence Among
- 29 Persons Living with HIV. *AIDS & Behavior*. 2017;21(7):2005-13.
- 30
- 31 79. Voon P, Hayashi K, Milloy MJ, Nguyen P, Wood E, Montaner J, et al. Pain Among High-Risk
- 32 Patients on Methadone Maintenance Treatment. *Journal of Pain*. 2015;16(9):887-94.
- 33
- 34 80. Wade DT, Makela PM, House H, Bateman C, Robson P. Long-term use of a cannabis-based
- 35 medicine in the treatment of spasticity and other symptoms in multiple sclerosis. *Multiple Sclerosis*.
- 36 2006;12(5):639-45.
- 37
- 38 81. Waissengrin B, Urban D, Leshem Y, Garty M, Wolf I. Patterns of use of medical cannabis among
- 39 Israeli cancer patients: a single institution experience. *Journal of Pain & Symptom Management*.
- 40 2015;49(2):223-30.
- 41
- 42 82. Walsh Z, Callaway R, Belle-Isle L, Capler R, Kay R, Lucas P, et al. Cannabis for therapeutic
- 43 purposes: patient characteristics, access, and reasons for use. *International Journal of Drug Policy*.
- 44 2013;24(6):511-6.
- 45
- 46 83. Ware MA, Rueda S, Singer J, Kilby D. Cannabis use by persons living with HIV/AIDS: Patterns and
- 47 prevalence of use. *Journal of Cannabis Therapeutics*. 2003;3(2):3-15.
- 48
- 49 84. Witt CM, Berling NEJ, Rinpoche NT, Cuomo M, Willich SN. Evaluation of medicinal plants as part
- 50 of Tibetan medicine prospective observational study in Sikkim and Nepal. *Journal of Alternative and*
- 51 *Complementary Medicine*. 2009;15(1):59-65.
- 52
- 53
- 54
- 55
- 56
- 57
- 58
- 59
- 60

1  
2  
3 85. Woolridge E, Barton S, Samuel J, Osorio J, Dougherty A, Holdcroft A. Cannabis use in HIV for pain  
4 and other medical symptoms. *Journal of Pain & Symptom Management*. 2005;29(4):358-67.  
5

6 86. Zhang H, Xie M, Levin M, Archibald SD, Jackson BS, Young JEM, et al. Survival outcomes of  
7 marijuana users in p16 positive oropharynx cancer patients. *Journal of Otolaryngology: Head and Neck  
8 Surgery*. 2019;48(1):43.  
9

#### 10 **Study did not report on medical cannabis**

11  
12 1. Brenton JN, Schreiner T, Karoscik K, Richter M, Ferrante S, Waldman A, et al. Attitudes,  
13 perceptions, and use of marijuana in youth with multiple sclerosis. *Journal of Neurology*.  
14 2018;265(2):417-23.  
15

16  
17 2. Chirchiglia D, Paventi S, Seminara P, Cione E, Gallelli L. N-Palmitoyl Ethanol Amide  
18 Pharmacological Treatment in Patients With Nonsurgical Lumbar Radiculopathy. *Journal of Clinical  
19 Pharmacology*. 2018;58(6):733-9.  
20

21 3. Coates MD, Soriano C, Dalessio S, Stuart A, Walter V, Koltun W, et al. Gastrointestinal  
22 hypoalgesia in inflammatory bowel disease. *Annals of Gastroenterology*. 2020;33(1):45-52.  
23

24 4. Cooke AC, Knight KR, Miaskowski C. Patients' and clinicians' perspectives of co-use of cannabis  
25 and opioids for chronic non-cancer pain management in primary care. *International Journal of Drug  
26 Policy*. 2019;63:23-8.  
27

28 5. Costiniuk CT, Saneei Z, Salahuddin S, Cox J, Routy JP, Rueda S, et al. Cannabis Consumption in  
29 People Living with HIV: Reasons for Use, Secondary Effects, and Opportunities for Health Education.  
30 *Cannabis and Cannabinoid Research*. 2019;4(3):204-13.  
31

32 6. Cuomo A, Russo G, Esposito G, Forte CA, Connola M, Marcassa C. Efficacy and gastrointestinal  
33 tolerability of oral oxycodone/naloxone combination for chronic pain in outpatients with cancer: An  
34 observational study. *American Journal of Hospice & Palliative Medicine*. 2014;31(8):867-76.  
35

36  
37 7. Finnerup NB, Norrbrink C, Trok K, Piehl F, Johannesen IL, Sorensen JC, et al. Phenotypes and  
38 predictors of pain following traumatic spinal cord injury: A prospective study. *Journal of Pain*.  
39 2014;15(1):40-8.  
40

41 8. Gallagher R, Best JA, Fyles G, Hawley P, Yeomans W. Attitudes and beliefs about the use of  
42 Cannabis for symptom control in a palliative population. *Journal of Cannabis Therapeutics*. 2003;3(2):41-  
43 50.  
44

45 9. Gill A, Williams AC. Preliminary study of chronic pain patients' concerns about cannabinoids as  
46 analgesics. *Clinical Journal of Pain*. 2001;17(3):245-8.  
47

48 10. Habib G, Avisar I. The Consumption of Cannabis by Fibromyalgia Patients in Israel. *Pain Research  
49 and Treatment*. 2018;2018:7829427.  
50

51 11. Harder S, Groenvold M, Isaksen J, Sigaard J, Frandsen KB, Neergaard MA, et al. Antiemetic use of  
52 olanzapine in patients with advanced cancer: results from an open-label multicenter study. *Supportive  
53 Care in Cancer*. 2019;27(8):2849-56.  
54  
55  
56  
57  
58  
59  
60

12. Hefner K, Sofuoglu M, Rosenheck R. Concomitant cannabis abuse/dependence in patients treated with opioids for non-cancer pain. *American Journal on Addictions*. 2015;24(6):538-45.
13. Johnson JR, Lossignol D, Burnell-Nugent M, Fallon MT. An open-label extension study to investigate the long-term safety and tolerability of THC/CBD oromucosal spray and oromucosal THC spray in patients with terminal cancer-related pain refractory to strong opioid analgesics. *Journal of Pain & Symptom Management*. 2013;46(2):207-18.
14. Lal S, Prasad N, Ryan M, Tangri S, Silverberg MS, Gordon A, et al. Cannabis use amongst patients with inflammatory bowel disease. *European Journal of Gastroenterology & Hepatology*. 2011;23(10):891-6.
15. Mai LM, Clark AJ, Gordon AS, Lynch ME, Morley-Forster PK, Nathan H, et al. Long-Term Outcomes in the Management of Painful Diabetic Neuropathy. *Canadian Journal of Neurological Sciences*. 2017;44(4):337-42.
16. Noyes R, Jr., Brunk SF, Avery DA, Canter AC. The analgesic properties of delta-9-tetrahydrocannabinol and codeine. *Clinical Pharmacology & Therapeutics*. 1975;18(1):84-9.
17. Pezzilli R, Ciuffreda P, Ottria R, Ravelli A, Melzi d'Eril G, Barassi A. Serum endocannabinoids in assessing pain in patients with chronic pancreatitis and in those with pancreatic ductal adenocarcinoma. *Scandinavian Journal of Gastroenterology*. 2017;52(10):1133-9.
18. Rogers AH, Shepherd JM, Paulus DJ, Orr MF, Ditre JW, Bakhshai J, et al. The Interaction of Alcohol Use and Cannabis Use Problems in Relation to Opioid Misuse Among Adults with Chronic Pain. *International Journal of Behavioral Medicine*. 2019;26(5):569-75.
19. Shiplo S, Asbridge M, Leatherdale ST, Hammond D. Medical cannabis use in Canada: Vapourization and modes of delivery. *Harm Reduction Journal*. 2016;13 (1) (no pagination)(30).
20. Ste-Marie PA, Shir Y, Rampakakis E, Sampalis JS, Karellis A, Cohen M, et al. Survey of herbal cannabis (marijuana) use in rheumatology clinic attenders with a rheumatologist confirmed diagnosis. *Pain*. 2016;157(12):2792-7.
21. Stein MD, Herman DS, Bailey GL, Straus J, Anderson BJ, Uebelacker LA, et al. Chronic pain and depression among primary care patients treated with buprenorphine. *Journal of General Internal Medicine*. 2015;30(7):935-41.
22. Stillman M, Mallow M, Ransom T, Gustafson K, Bell A, Graves D. Attitudes toward and knowledge of medical cannabis among individuals with spinal cord injury. *Spinal Cord Series and Cases*. 2019;5:6.
23. Tripp DA, Nickel JC, Katz L, Krsmanovic A, Ware MA, Santor D. A survey of cannabis (marijuana) use and self-reported benefit in men with chronic prostatitis/chronic pelvic pain syndrome. *Canadian Urological Association Journal*. 2014;8(11-12):E901-5.
24. Weinkle L, Domen CH, Shelton I, Sillau S, Nair K, Alvarez E. Exploring cannabis use by patients with multiple sclerosis in a state where cannabis is legal. *Multiple Sclerosis and Related Disorders*. 2019;27:383-90.

1  
2  
3 25. Weinrieb RM, Barnett R, Lynch KG, DePiano M, Atanda A, Olthoff KM. A matched comparison  
4 study of medical and psychiatric complications and anesthesia and analgesia requirements in  
5 methadone-maintained liver transplant recipients. *Liver Transplantation*. 2004;10(1):97-106.  
6

7 **Study did not report on harms or adverse events**  
8

- 9 1. Aggarwal S, Carter G, Sullivan M, Zumbunnen C, Morrill R, Mayer J. Prospectively surveying  
10 health-related quality of life and symptom relief in a lot-based sample of medical cannabis-using  
11 patients in urban Washington State reveals managed chronic illness and debility. *American Journal of*  
12 *Hospice & Palliative Medicine*. 2013;30(6):523-31.  
13  
14 2. Ashrafioun L, Bohnert KM, Jannausch M, Ilgen MA. Characteristics of substance use disorder  
15 treatment patients using medical cannabis for pain. *Addictive Behaviors*. 2015;42:185-8.  
16  
17 3. Bigand T, Anderson CL, Roberts ML, Shaw MR, Wilson M. Benefits and adverse effects of  
18 cannabis use among adults with persistent pain. *Nursing Outlook*. 2019;67(3):223-31.  
19  
20 4. Boehnke KF, Litinas E, Clauw DJ. Medical Cannabis Use Is Associated With Decreased Opiate  
21 Medication Use in a Retrospective Cross-Sectional Survey of Patients With Chronic Pain. *Journal of Pain*.  
22 2016;17(6):739-44.  
23  
24 5. Boehnke KF, Scott JR, Litinas E, Sisley S, Williams DA, Clauw DJ. Pills to Pot: Observational  
25 Analyses of Cannabis Substitution Among Medical Cannabis Users With Chronic Pain. *Journal of Pain*.  
26 2019;20(7):830-41.  
27  
28 6. Capano A, Weaver R, Burkman E. Evaluation of the effects of CBD hemp extract on opioid use  
29 and quality of life indicators in chronic pain patients: a prospective cohort study. *Postgraduate*  
30 *Medicine*. 2020;132(1):56-61.  
31  
32 7. Consroe P, Musty R, Rein J, Tillery W, Pertwee R. The perceived effects of smoked cannabis on  
33 patients with multiple sclerosis. *European Neurology*. 1997;38(1):44-8.  
34  
35 8. Cranford JA, Bohnert KM, Perron BE, Bourque C, Ilgen M. Prevalence and correlates of "Vaping"  
36 as a route of cannabis administration in medical cannabis patients. *Drug and Alcohol Dependence*.  
37 2016;169:41-7.  
38  
39 9. Curtis SA, Spodick J, Lew D, Roberts JD. Medical marijuana certification for patients with sickle  
40 cell disease: A survey study of patient's use and preferences. *Blood Conference: 60th Annual Meeting of*  
41 *the American Society of Hematology, ASH*. 2018;132(Suppl. 1).  
42  
43 10. Davis AK, Walton MA, Bohnert KM, Bourque C, Ilgen MA. Factors associated with alcohol  
44 consumption among medical cannabis patients with chronic pain. *Addictive Behaviors*. 2018;77:166-71.  
45  
46 11. Donovan KA, Oberoi-Jassal R, Chang YD, Rajasekhara S, Haas MF, Randich AL, et al. Cannabis Use  
47 in Young Adult Cancer Patients. *Journal of Adolescent & Young Adult Oncology*. 2020;9(1):30-5.  
48  
49 12. Drossel C, Forchheimer M, Meade MA. Characteristics of Individuals with Spinal Cord Injury Who  
50 Use Cannabis for Therapeutic Purposes. *Topics in Spinal Cord Injury Rehabilitation*. 2016;22(1):3-12.  
51  
52  
53  
54  
55  
56  
57  
58  
59  
60



13. Ehde DM, Alschuler KN, Osborne TL, Hanley MA, Jensen MP, Kraft GH. Utilization and patients' perceptions of the effectiveness of pain treatments in multiple sclerosis: A cross-sectional survey. *Disability & Health Journal*. 2015;8(3):452-6.
14. Gras A, Broughton J. A cost-effectiveness model for the use of a cannabis-derived oromucosal spray for the treatment of spasticity in multiple sclerosis. *Expert Review of Pharmacoeconomics and Outcomes Research*. 2016;16(6):771-9.
15. Jehangir A, Parkman HP. Cannabinoid Use in Patients With Gastroparesis and Related Disorders: Prevalence and Benefit. *American Journal of Gastroenterology*. 2019;114(6):945-53.
16. Kindred JH, Li K, Ketelhut NB, Proessl F, Fling BW, Honce JM, et al. Cannabis use in people with Parkinson's disease and Multiple Sclerosis: A web-based investigation. *Complementary Therapies in Medicine*. 2017;33:99-104.
17. Lake S, Walsh Z, Kerr T, Cooper ZD, Buxton J, Wood E, et al. Frequency of cannabis and illicit opioid use among people who use drugs and report chronic pain: A longitudinal analysis. *PLoS Medicine / Public Library of Science*. 2019;16(11):e1002967.
18. Li X, Vigil JM, Stith SS, Brockelman F, Keeling K, Hall B. The effectiveness of self-directed medical cannabis treatment for pain. *Complementary Therapies in Medicine*. 2019;46:123-30.
19. Lucas P, Baron EP, Jikomes N. Medical cannabis patterns of use and substitution for opioids & other pharmaceutical drugs, alcohol, tobacco, and illicit substances; Results from a cross-sectional survey of authorized patients. *Harm Reduction Journal Vol 16 2019, ArtID 9*. 2019;16.
20. Mallada Frechin J. Effect of tetrahydrocannabinol:cannabidiol oromucosal spray on activities of daily living in multiple sclerosis patients with resistant spasticity: a retrospective, observational study. *Neurodegenerative Disease Management*. 2018;8(3):151-9.
21. Marinelli L, Mori L, Canneva S, Colombano F, Curra A, Fattapposta F, et al. The effect of cannabinoids on the stretch reflex in multiple sclerosis spasticity. *International Clinical Psychopharmacology*. 2016;31(4):232-9.
22. Mbachii C, Attar B, Oyenubi O, Yuchen W, Efesomwan A, Paintsil I, et al. Association between cannabis use and complications related to ulcerative colitis in hospitalized patients: A propensity matched retrospective cohort study. *Medicine*. 2019;98(32):e16551.
23. Mbachii C, Attar B, Wang Y, Paintsil I, Mba B, Fugar S, et al. Association Between Cannabis Use and Complications Related to Crohn's Disease: A Retrospective Cohort Study. *Digestive Diseases & Sciences*. 2019;64(10):2939-44.
24. Mercurio A, Aston ER, Claborn KR, Wayne K, Rosen RK. Marijuana as a substitute for prescription medications: A qualitative study. *Substance Use & Misuse*. 2019;54(11):1894-902.
25. Merker AM, Riaz M, Friedman S, Allegretti JR, Korzenik J. Legalization of Medicinal Marijuana Has Minimal Impact on Use Patterns in Patients With Inflammatory Bowel Disease. *Inflammatory Bowel Diseases*. 2018;24(11):2309-14.

- 1  
2  
3 26. Messina S, Solaro C, Righini I, Bergamaschi R, Bonavita S, Bossio RB, et al. Sativex in resistant  
4 multiple sclerosis spasticity: Discontinuation study in a large population of Italian patients (SA.FE. study).  
5 PLoS ONE [Electronic Resource]. 2017;12(8):e0180651.  
6
- 7 27. Meyer T, Funke A, Munch C, Kettemann D, Maier A, Walter B, et al. Real world experience of  
8 patients with amyotrophic lateral sclerosis (ALS) in the treatment of spasticity using  
9 tetrahydrocannabinol:cannabidiol (THC:CBD). BMC Neurology. 2019;19(1):222.  
10
- 11 28. Michalski CW, Oti FE, Erkan M, Sauliunaite D, Bergmann F, Pacher P, et al. Cannabinoids in  
12 pancreatic cancer: Correlation with survival and pain. International Journal of Cancer. 2008;122(4):742-  
13 50.  
14
- 15 29. Naftali T, Lev LB, Yablecovitch D, Half E, Konikoff FM. Treatment of Crohn's disease with  
16 cannabis: an observational study. Israel Medical Association Journal: Imaj. 2011;13(8):455-8.  
17
- 18 30. Page SA, Verhoef MJ, Stebbins RA, Metz LM, Levy JC. Cannabis use as described by people with  
19 multiple sclerosis. Canadian Journal of Neurological Sciences. 2003;30(3):201-5.  
20
- 21 31. Perron BE, Bohnert K, Perone AK, Bonn-Miller MO, Ilgen M. Use of prescription pain medications  
22 among medical cannabis patients: comparisons of pain levels, functioning, and patterns of alcohol and  
23 other drug use. Journal of Studies on Alcohol & Drugs. 2015;76(3):406-13.  
24
- 25 32. Piper BJ, Dekeuster RM, Beals ML, Cobb CM, Burchman CA, Perkinson L, et al. Substitution of  
26 medical cannabis for pharmaceutical agents for pain, anxiety, and sleep. Journal of  
27 Psychopharmacology. 2017;31(5):569-75.  
28
- 29 33. Reiman A, Welty M, Solomon P. Cannabis as a Substitute for Opioid-Based Pain Medication:  
30 Patient Self-Report. Cannabis and Cannabinoid Research. 2017;2(1):160-6.  
31
- 32 34. Rochford C, Edgeworth D, Hashim M, Harmon D. Attitudes of Irish patients with chronic pain  
33 towards medicinal cannabis. Irish Journal of Medical Science. 2019;188(1):267-72.  
34
- 35 35. Russo M, De Luca R, Torrisi M, Rifici C, Sessa E, Bramanti P, et al. Should we care about sativex-  
36 induced neurobehavioral effects? A 6-month follow-up study. European Review for Medical &  
37 Pharmacological Sciences. 2016;20(14):3127-33.  
38
- 39 36. Saadeh CE, Rustem DR. Medical Marijuana Use in a Community Cancer Center. Journal of  
40 oncology practice/American Society of Clinical Oncology. 2018;14(9):e566-e78.  
41
- 42 37. Spencer N, Shaw E, Slaven M. Medical cannabis use in an outpatient palliative care clinic: A  
43 retrospective chart review. Journal of Pain Management. 2016;9(4):507-13.  
44
- 45 38. Ste-Marie PA, Fitzcharles MA, Gamsa A, Ware MA, Shir Y. Association of herbal cannabis use  
46 with negative psychosocial parameters in patients with fibromyalgia. Arthritis care & research.  
47 2012;64(8):1202-8.  
48
- 49 39. Sznitman SR, Goldberg V, Sheinman-Yuffe H, Flechter E, Bar-Sela G. Storage and disposal of  
50 medical cannabis among patients with cancer: Assessing the risk of diversion and unintentional  
51 digestion. Cancer. 2016;122(21):3363-70.  
52  
53  
54  
55  
56  
57  
58  
59  
60

- 1  
2  
3 40. Victorson D, McMahon M, Horowitz B, Glickson S, Parker B, Mendoza-Temple L. Exploring  
4 cancer survivors' attitudes, perceptions, and concerns about using medical cannabis for symptom and  
5 side effect management: A qualitative focus group study. *Complementary Therapies in Medicine*.  
6 2019;47:102204.  
7  
8 41. Ware MA, Adams H, Guy GW. The medicinal use of cannabis in the UK: results of a nationwide  
9 survey. *International Journal of Clinical Practice*. 2005;59(3):291-5.  
10  
11 42. Ware MA, Martel MO, Jovey R, Lynch ME, Singer J. A prospective observational study of  
12 problematic oral cannabinoid use. *Psychopharmacology*. 2018;235(2):409-17.  
13  
14

15 **Study included <25 patients**

- 16  
17 1. Apel A, Greim B, Zettl UK. How frequently do patients with multiple sclerosis use  
18 complementary and alternative medicine? *Complementary Therapies in Medicine*. 2005;13(4):258-63.  
19  
20 2. Mondello E, Quattrone D, Cardia L, Bova G, Mallamace R, Barbagallo AA, et al. Cannabinoids and  
21 spinal cord stimulation for the treatment of failed back surgery syndrome refractory pain. *Journal of*  
22 *Pain Research*. 2018;11:1761-7.  
23  
24 3. Toth C, Au S. A prospective identification of neuropathic pain in specific chronic polyneuropathy  
25 syndromes and response to pharmacological therapy. *Pain*. 2008;138(3):657-66.  
26  
27  
28  
29  
30  
31  
32  
33  
34  
35  
36  
37  
38  
39  
40  
41  
42  
43  
44  
45  
46  
47  
48  
49  
50  
51  
52  
53  
54  
55  
56  
57  
58  
59  
60

**Appendix 5: Risk of bias ratings**

| Study                   | Confounding | Selection of participants into the study | Classification of the intervention | Departures from the intended intervention | Missing data | Measurement of outcomes | Selection of the reported Results |
|-------------------------|-------------|------------------------------------------|------------------------------------|-------------------------------------------|--------------|-------------------------|-----------------------------------|
| Ware, 2003              | ●           | ●                                        | ●                                  | ●                                         | ●            | ●                       | ●                                 |
| Lynch, 2006             | ●           | ●                                        | ●                                  | ●                                         | ●            | ●                       | ●                                 |
| Rog, 2007               | ●           | ●                                        | ●                                  | ●                                         | ●            | ●                       | ●                                 |
| Weber, 2009             | ●           | ●                                        | ●                                  | ●                                         | ●            | ●                       | ●                                 |
| Bestard, 2011*          | ●           | ●                                        | ●                                  | ●                                         | ●            | ●                       | ●                                 |
| Fiz, 2011               | ●           | ●                                        | ●                                  | ●                                         | ●            | ●                       | ●                                 |
| Dominguez, 2012         | ●           | ●                                        | ●                                  | ●                                         | ●            | ●                       | ●                                 |
| Gatti, 2012             | ●           | ●                                        | ●                                  | ●                                         | ●            | ●                       | ●                                 |
| Toth, 2012              | ●           | ●                                        | ●                                  | ●                                         | ●            | ●                       | ●                                 |
| Schifilliti, 2014       | ●           | ●                                        | ●                                  | ●                                         | ●            | ●                       | ●                                 |
| Storr, 2014             | ●           | ●                                        | ●                                  | ●                                         | ●            | ●                       | ●                                 |
| Del Giorno, 2015        | ●           | ●                                        | ●                                  | ●                                         | ●            | ●                       | ●                                 |
| Hoggart, 2015           | ●           | ●                                        | ●                                  | ●                                         | ●            | ●                       | ●                                 |
| Ware, 2015†             | ●           | ●                                        | ●                                  | ●                                         | ●            | ●                       | ●                                 |
| Haroutounian, 2016      | ●           | ●                                        | ●                                  | ●                                         | ●            | ●                       | ●                                 |
| Bellnier, 2017          | ●           | ●                                        | ●                                  | ●                                         | ●            | ●                       | ●                                 |
| Cranford, 2017          | ●           | ●                                        | ●                                  | ●                                         | ●            | ●                       | ●                                 |
| Fanelli, 2017           | ●           | ●                                        | ●                                  | ●                                         | ●            | ●                       | ●                                 |
| Feingold, 2017          | ●           | ●                                        | ●                                  | ●                                         | ●            | ●                       | ●                                 |
| Paladini, 2017          | ●           | ●                                        | ●                                  | ●                                         | ●            | ●                       | ●                                 |
| Passavanti, 2017        | ●           | ●                                        | ●                                  | ●                                         | ●            | ●                       | ●                                 |
| Schimrigk, 2017         | ●           | ●                                        | ●                                  | ●                                         | ●            | ●                       | ●                                 |
| Chirchiglia, 2018       | ●           | ●                                        | ●                                  | ●                                         | ●            | ●                       | ●                                 |
| Crowley, 2018           | ●           | ●                                        | ●                                  | ●                                         | ●            | ●                       | ●                                 |
| Habib, 2018             | ●           | ●                                        | ●                                  | ●                                         | ●            | ●                       | ●                                 |
| Anderson, 2019          | ●           | ●                                        | ●                                  | ●                                         | ●            | ●                       | ●                                 |
| Bonar, 2019             | ●           | ●                                        | ●                                  | ●                                         | ●            | ●                       | ●                                 |
| Cervigni, 2019          | ●           | ●                                        | ●                                  | ●                                         | ●            | ●                       | ●                                 |
| Cremer-Schaeffer, 2019‡ | ●           | ●                                        | ●                                  | ●                                         | ●            | ●                       | ●                                 |
| Lejczak, 2019           | ●           | ●                                        | ●                                  | ●                                         | ●            | ●                       | ●                                 |
| Loi, 2019               | ●           | ●                                        | ●                                  | ●                                         | ●            | ●                       | ●                                 |
| Naftali, 2019           | ●           | ●                                        | ●                                  | ●                                         | ●            | ●                       | ●                                 |
| Perron, 2019            | ●           | ●                                        | ●                                  | ●                                         | ●            | ●                       | ●                                 |
| Sagy, 2019              | ●           | ●                                        | ●                                  | ●                                         | ●            | ●                       | ●                                 |
| Sinclair, 2019          | ●           | ●                                        | ●                                  | ●                                         | ●            | ●                       | ●                                 |
| Ueberall, 2019          | ●           | ●                                        | ●                                  | ●                                         | ●            | ●                       | ●                                 |
| Vigil, 2019             | ●           | ●                                        | ●                                  | ●                                         | ●            | ●                       | ●                                 |
| Yassin, 2019            | ●           | ●                                        | ●                                  | ●                                         | ●            | ●                       | ●                                 |
| Giorgi, 2020            | ●           | ●                                        | ●                                  | ●                                         | ●            | ●                       | ●                                 |

|                       |   |
|-----------------------|---|
| Low risk of bias      | ● |
| Moderate risk of bias | ● |
| Serious risk of bias  | ● |
| Critical risk of bias | ● |

\* Risk of bias for confounding for comparative results were rated as serious.

† Risk of bias for confounding for unadjusted comparative comparative results were rated as serious. Adjusted comparative results were rated as moderate.

‡ The study reported on dronabinol, nabiximols, and herbal cannabis separately. The results for herbal cannabis were at serious risk of selection bias due to prior herbal cannabis use among participants.

**Appendix 6: Results for all adverse events (subgroup by design)**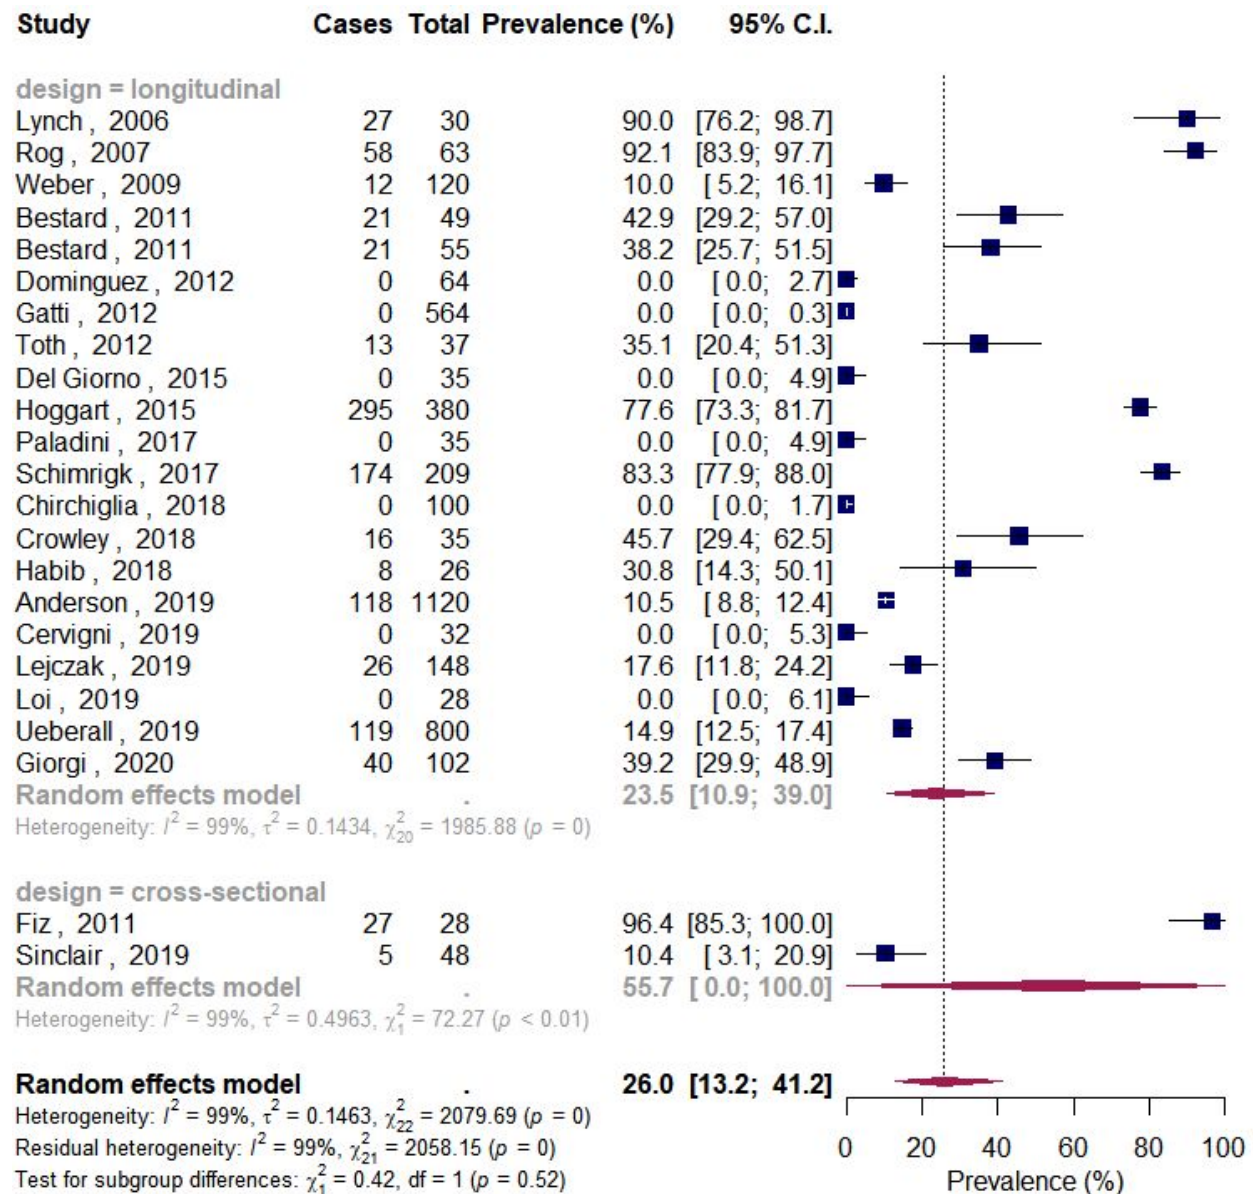

**Appendix 7: Results for all adverse events (subgroup by duration)**

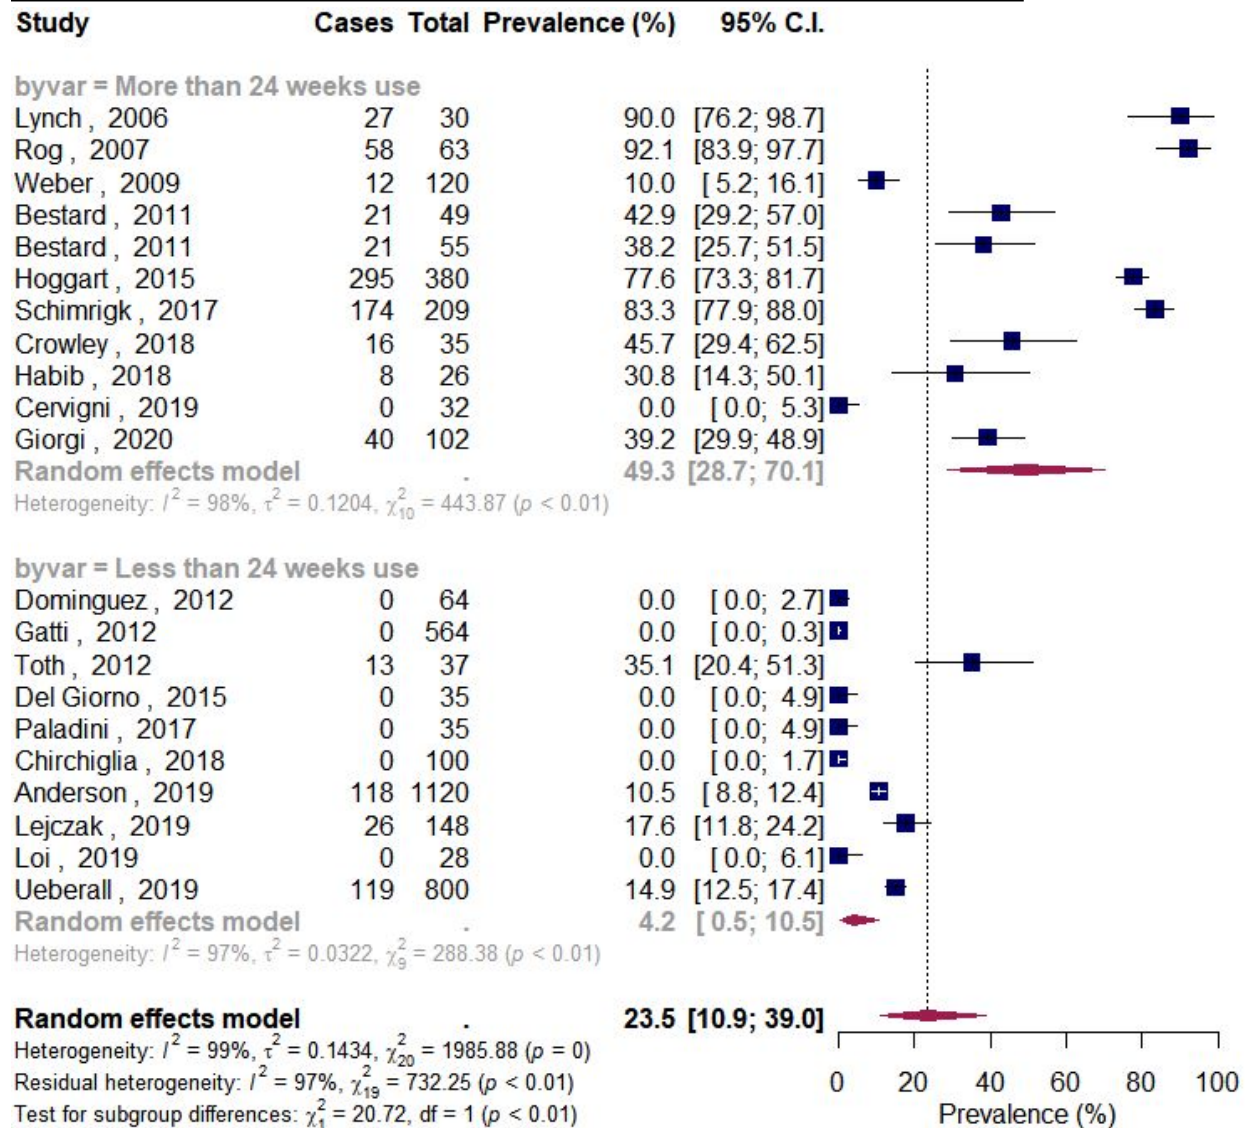

**Appendix 8: Results for all adverse events (subgroup by cannabis)**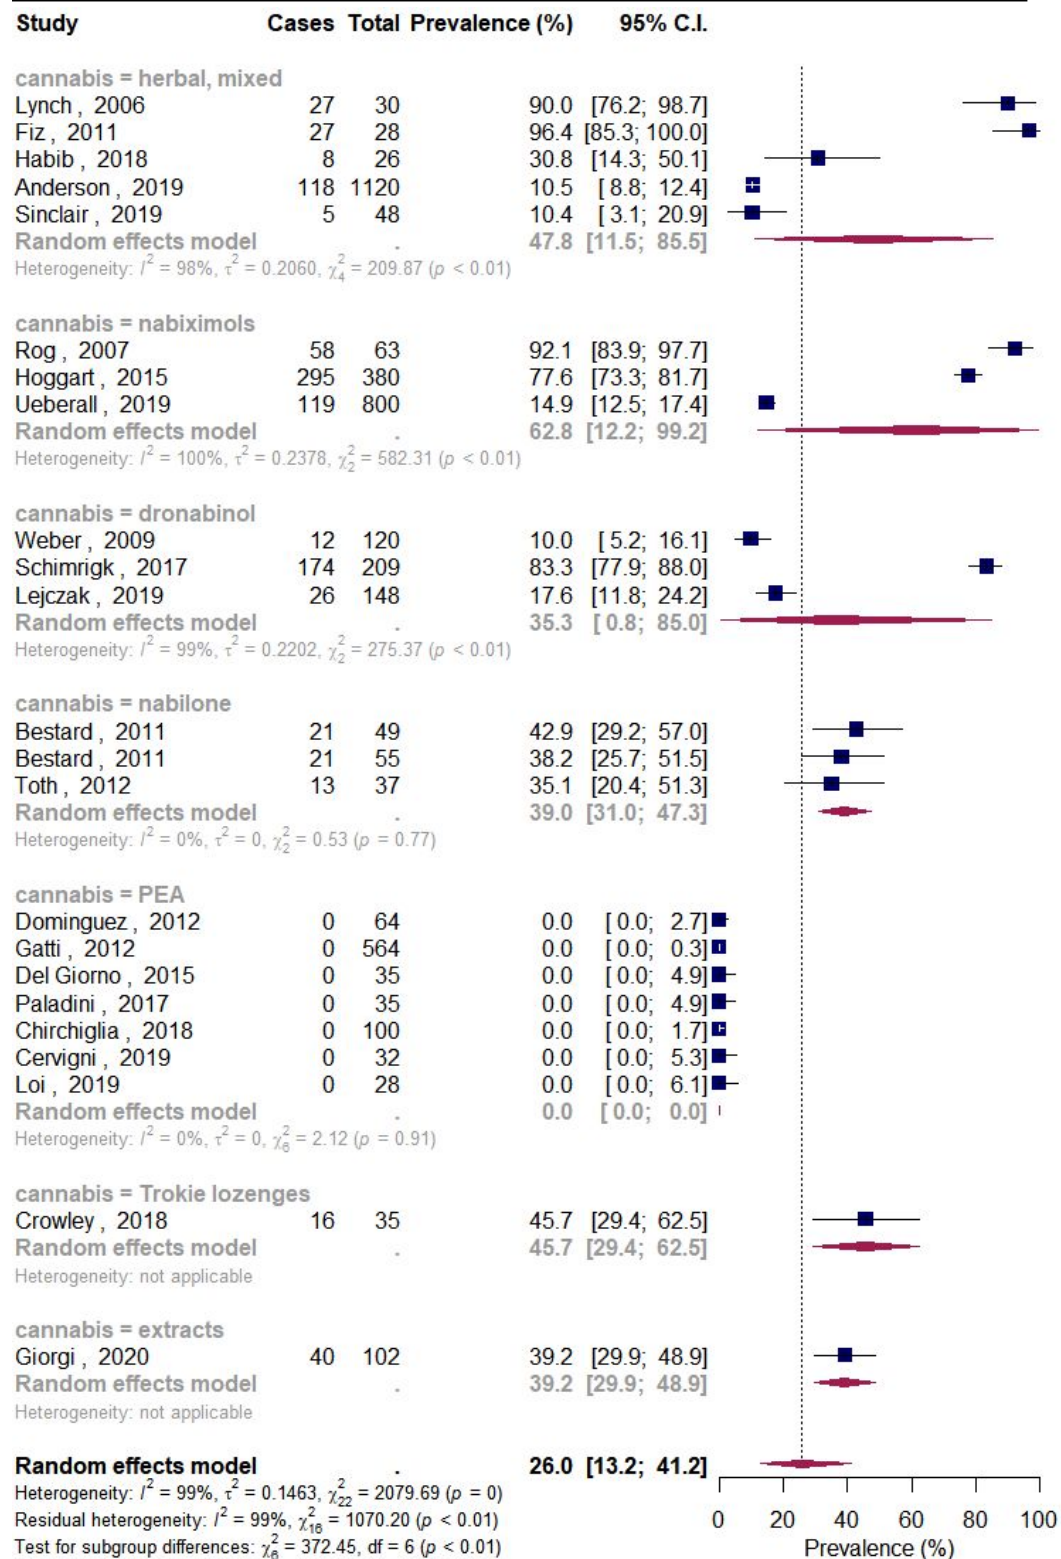

**Appendix 9: Results for all adverse events (subgroup by selection bias)**

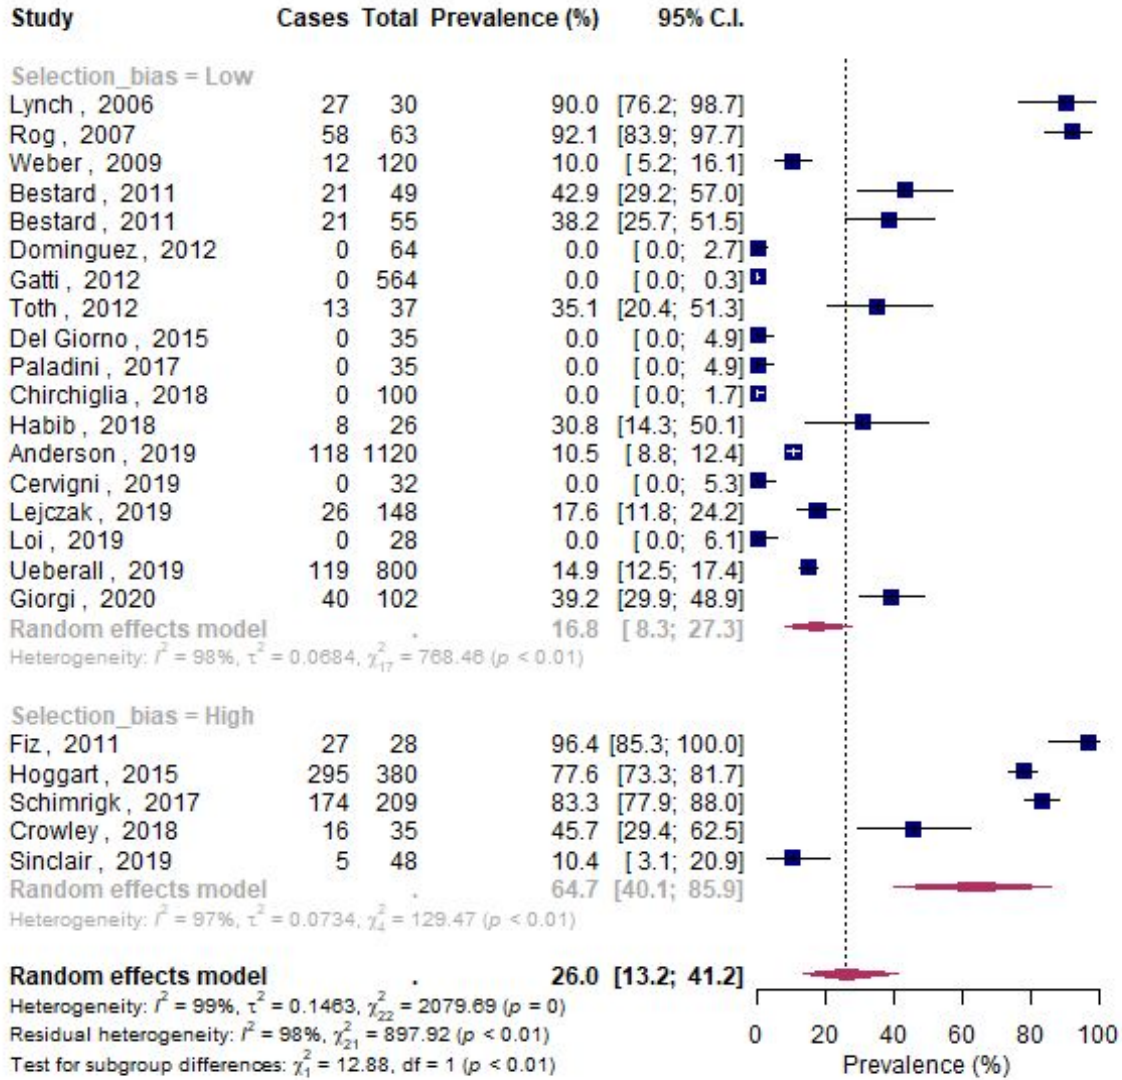



## Appendix 10: Results for adverse events leading to discontinuation (subgroup by duration)

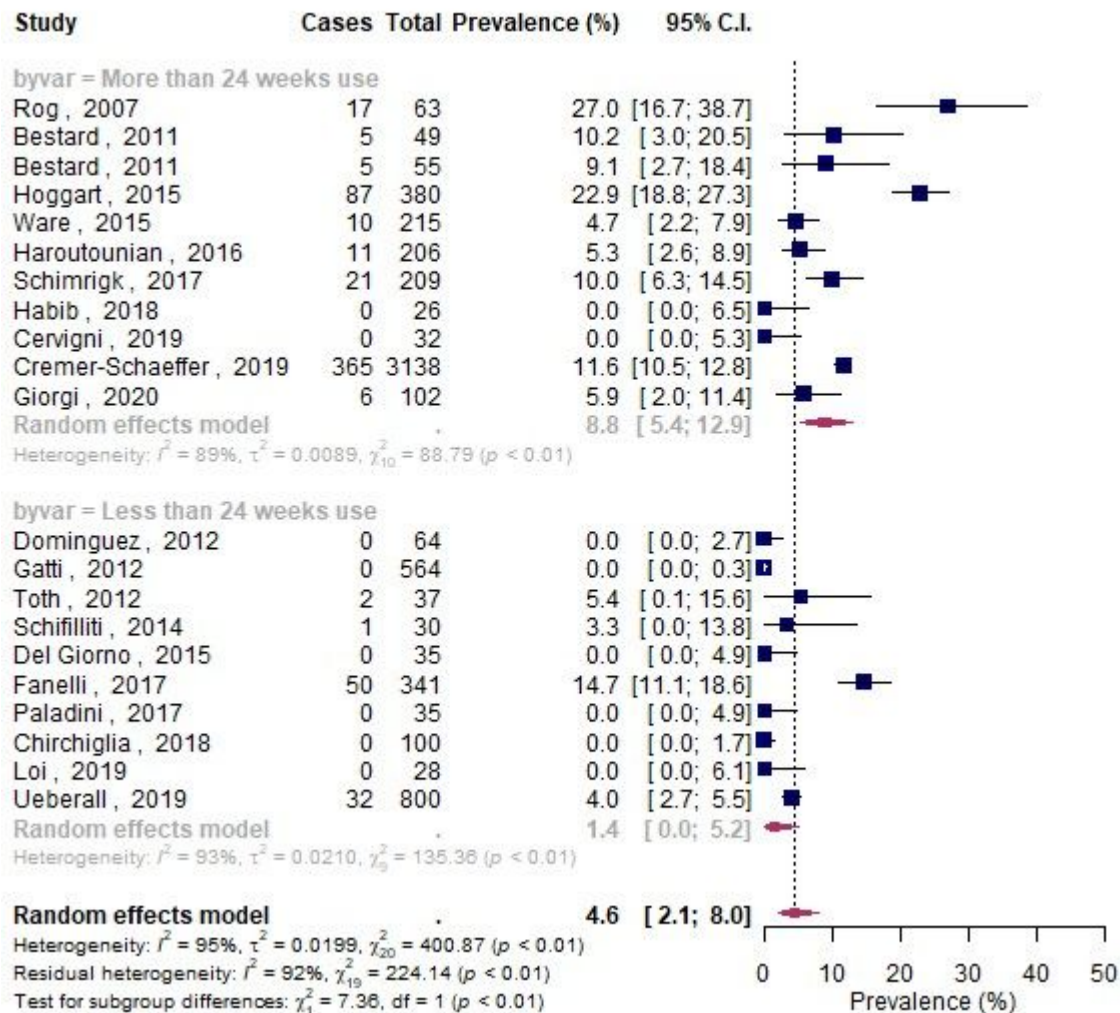

**Appendix 11: Results for adverse events leading to discontinuation (subgroup by cannabis)**

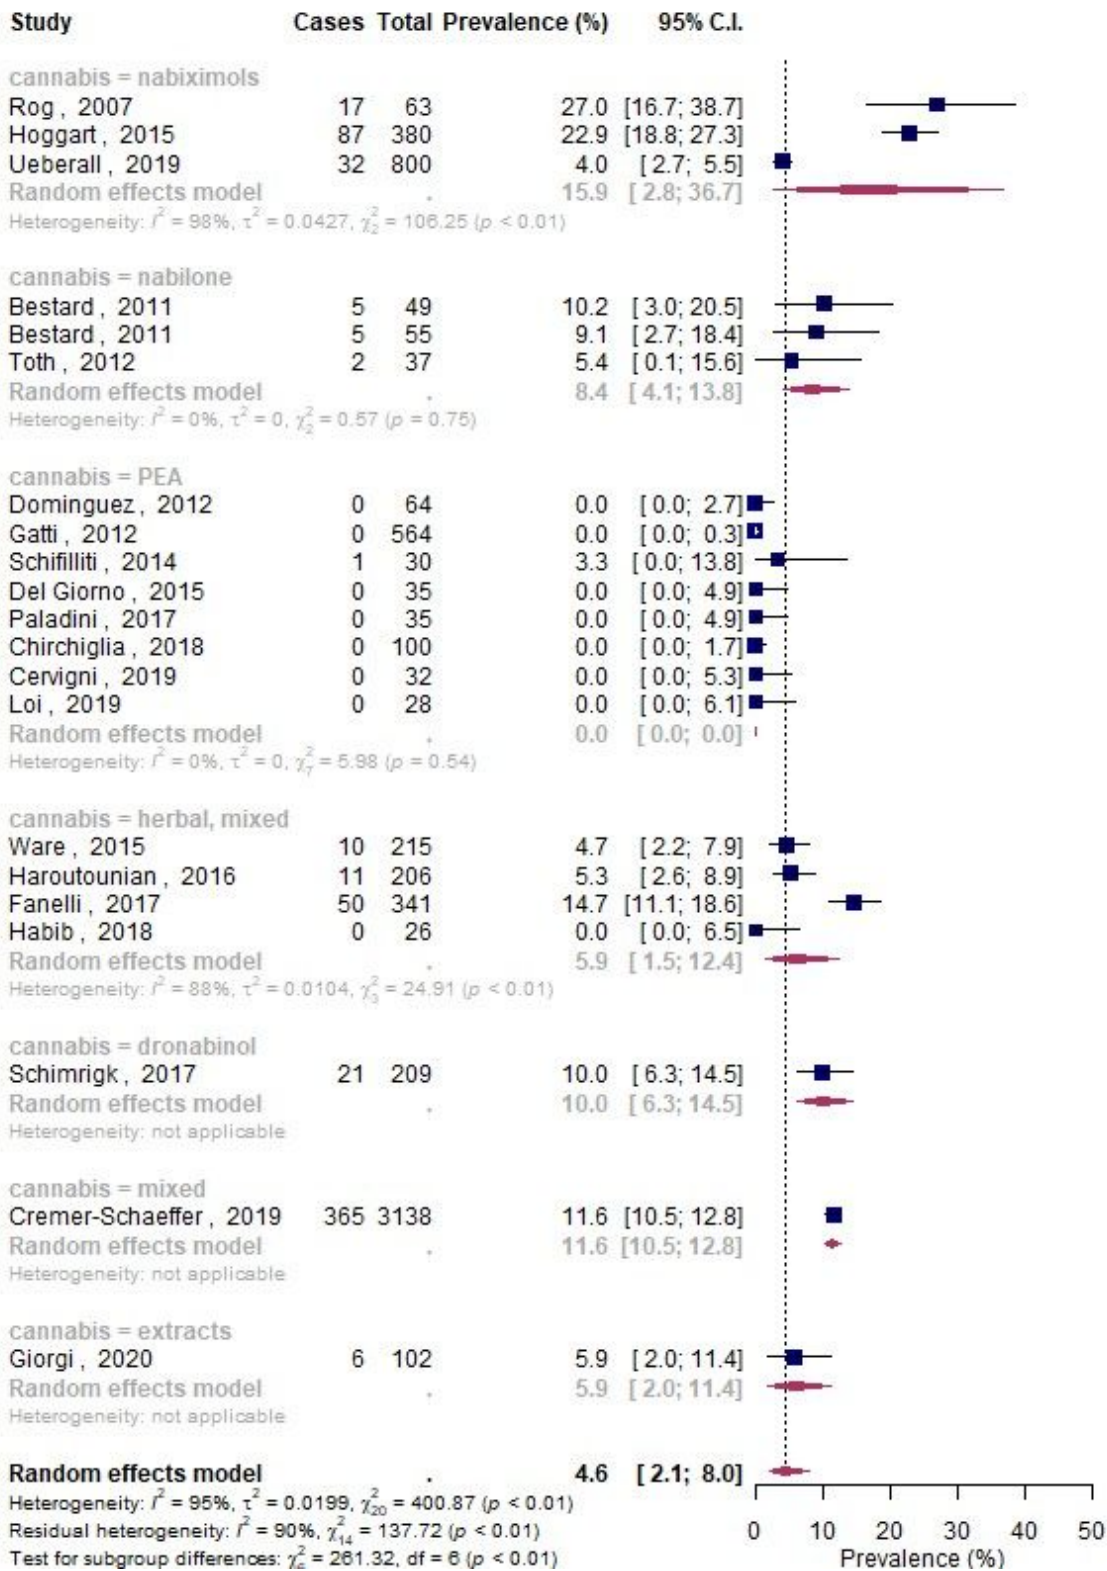

## Appendix 12: Results for adverse events leading to discontinuation (subgroup by selection bias)

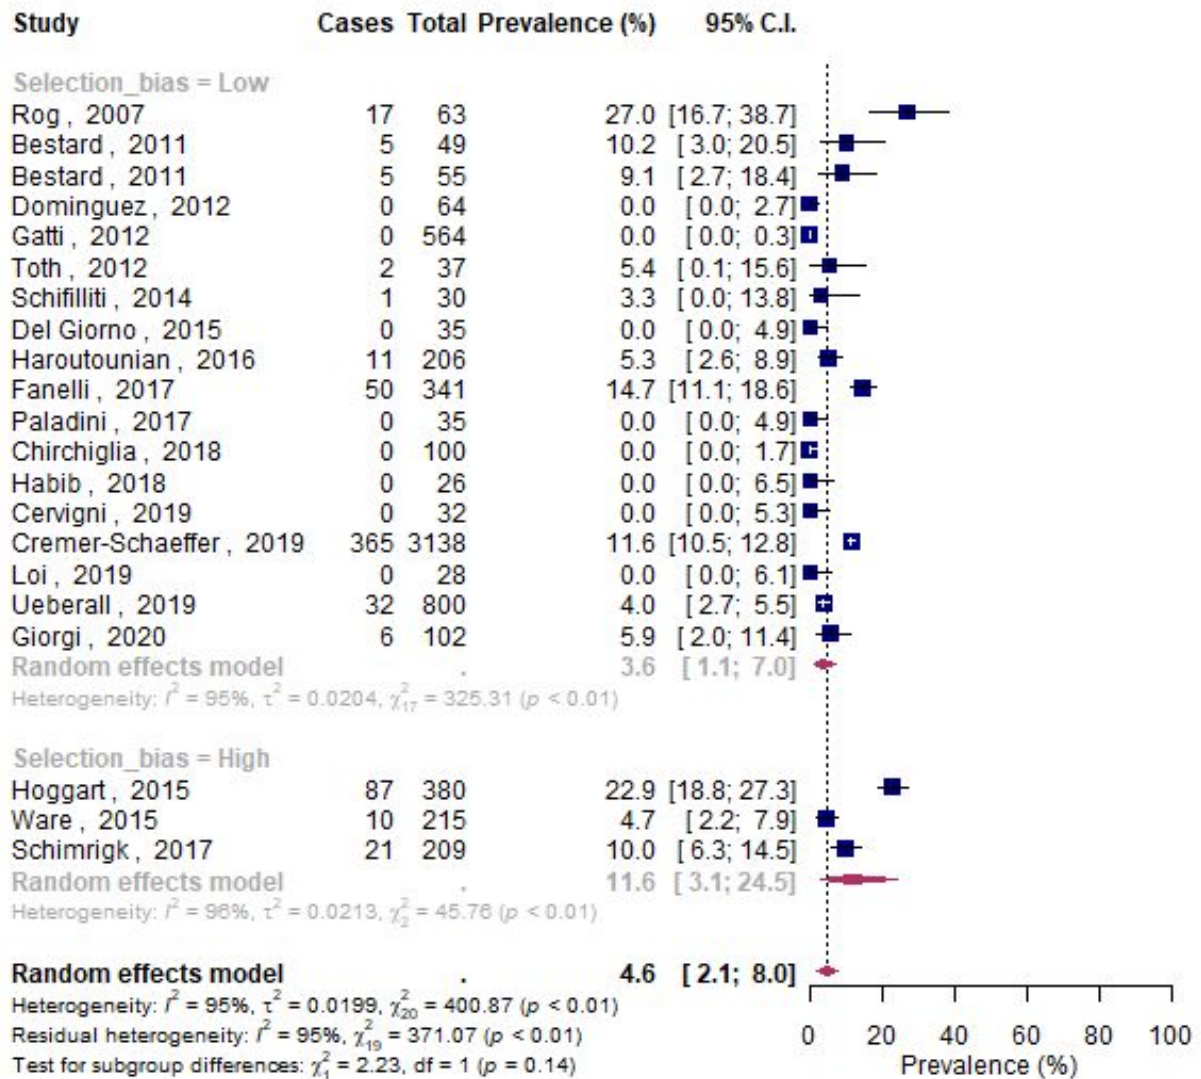

**Appendix 13: Results for serious adverse events (subgroup by design)**

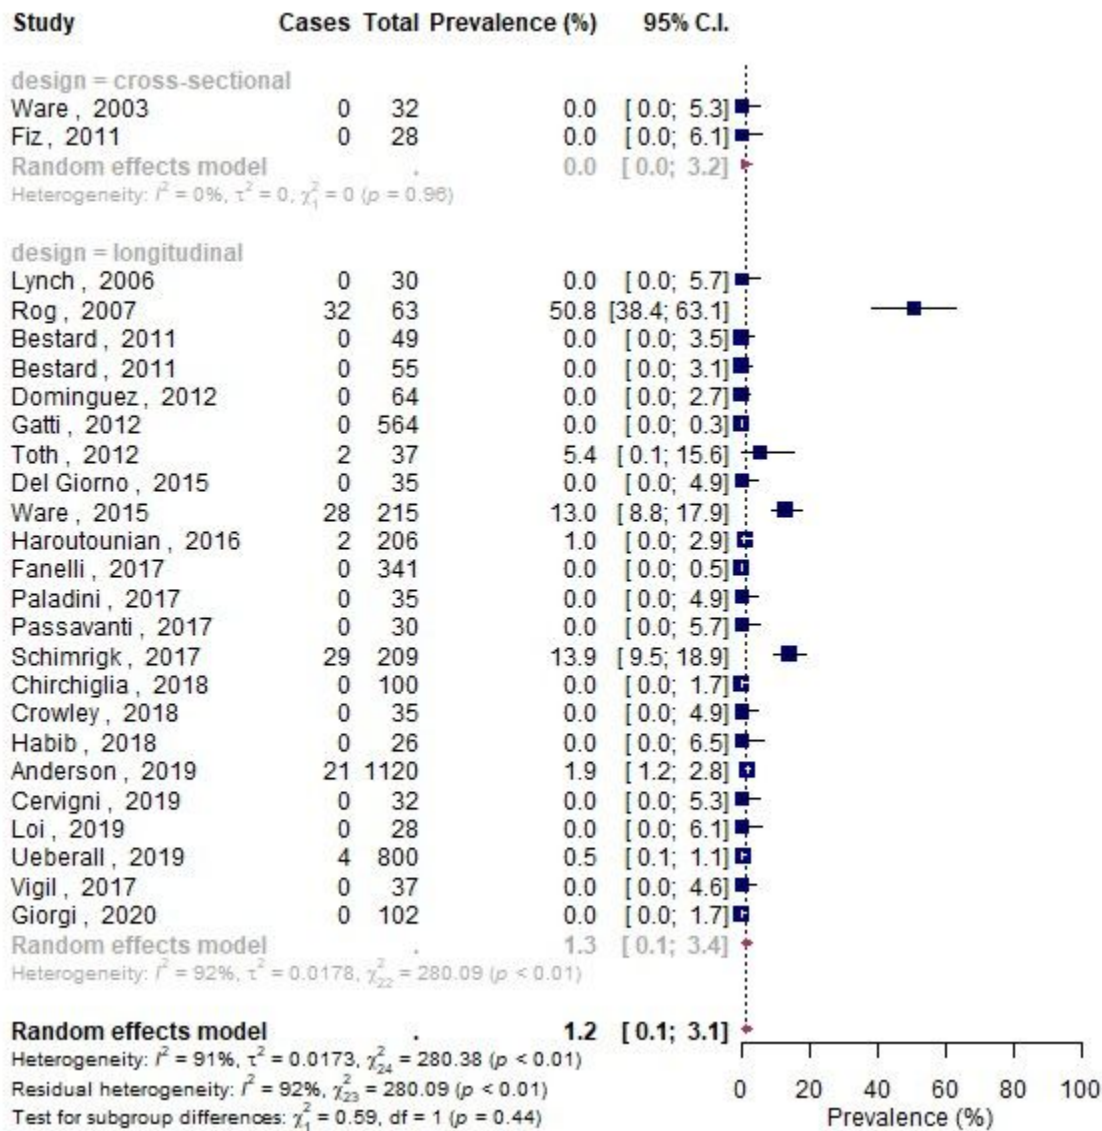

## Appendix 14: Results for serious adverse events (subgroup by duration)

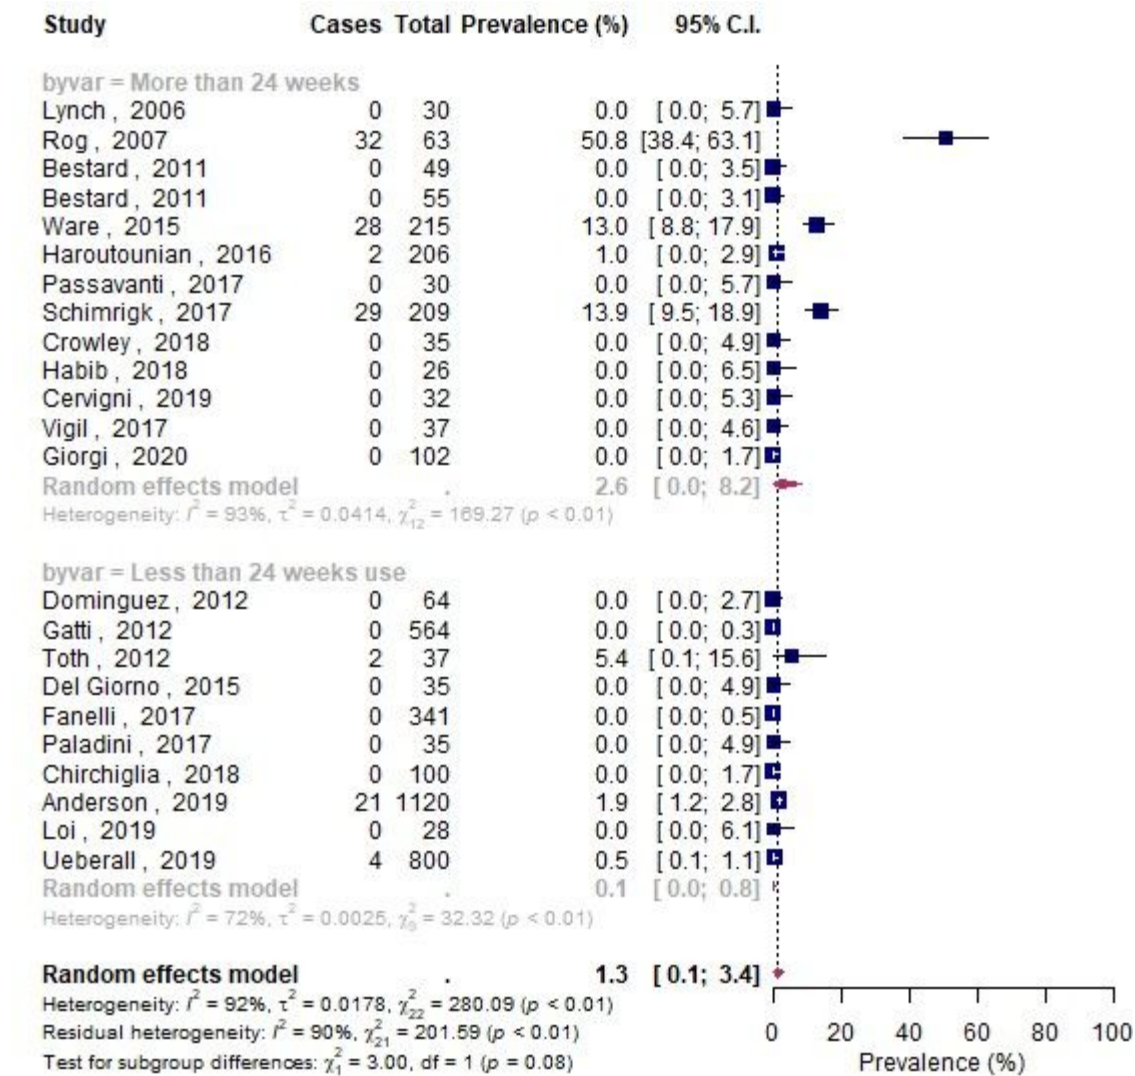

## Appendix 15: Results for serious adverse events (subgroup by selection bias)

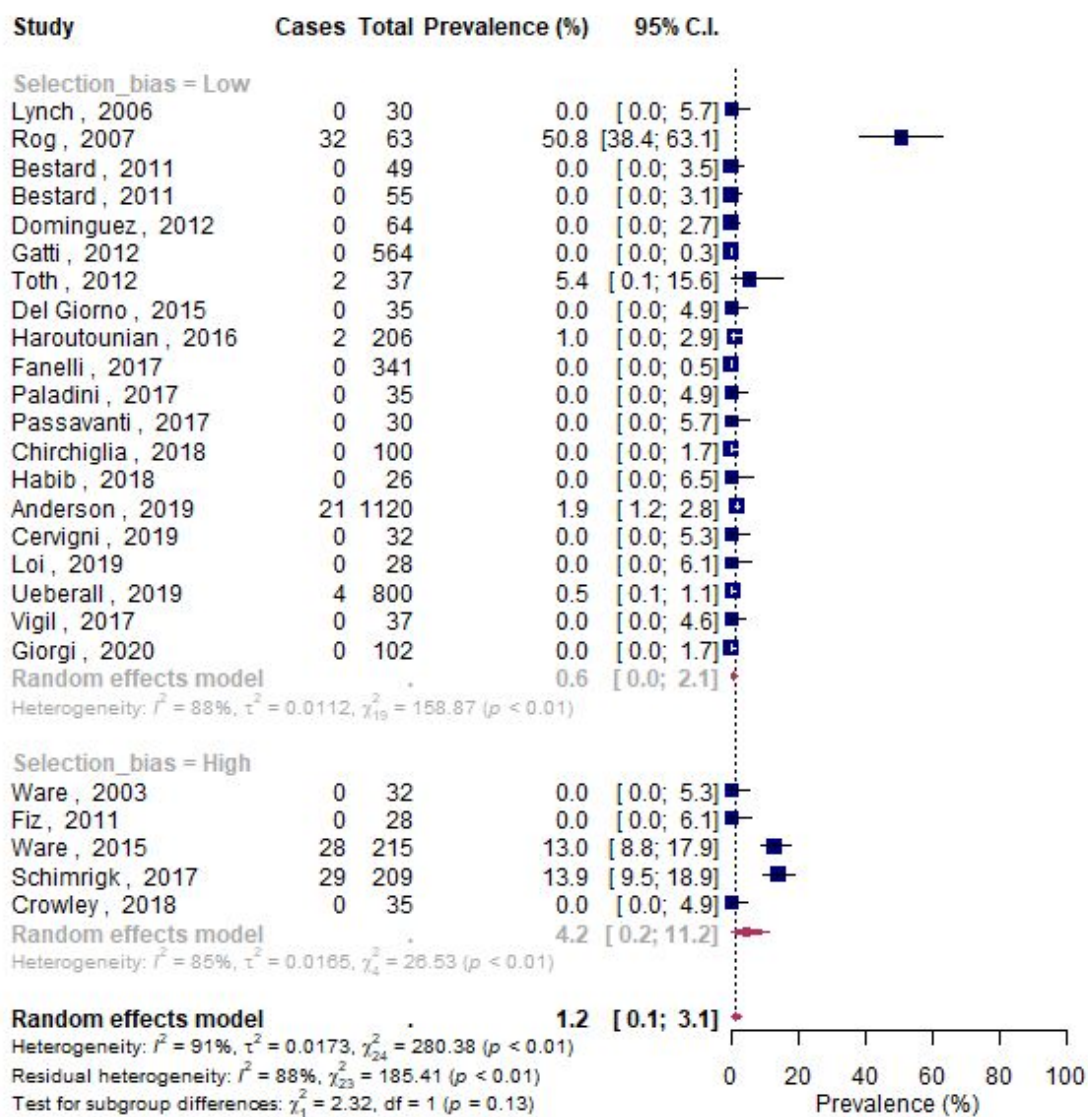

## Appendix 16: Results for psychiatric adverse events

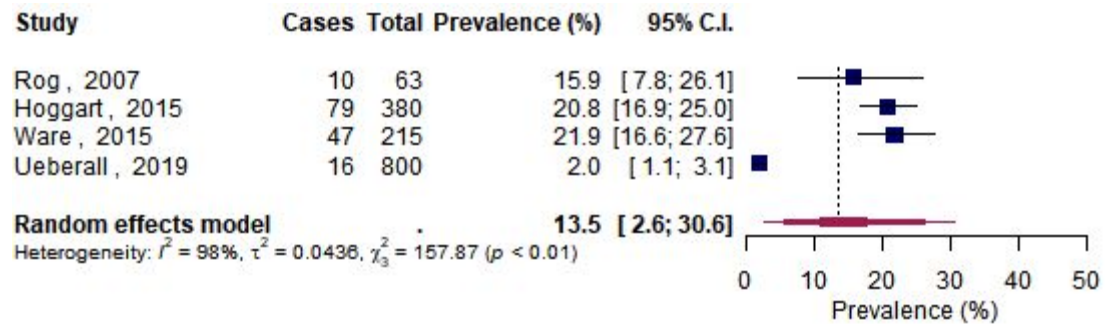

Or peer review only

**Appendix 17: Results for suicide**

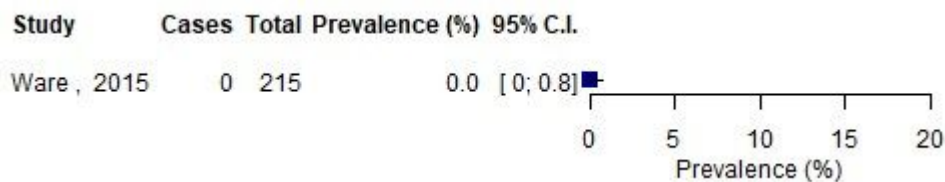

For peer review only



## Appendix 18: Results for suicidal thoughts

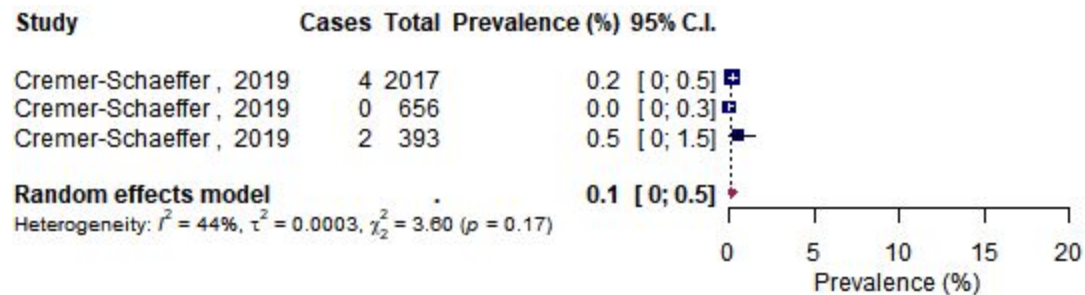

For peer review only

**Appendix 19: Results for depression**

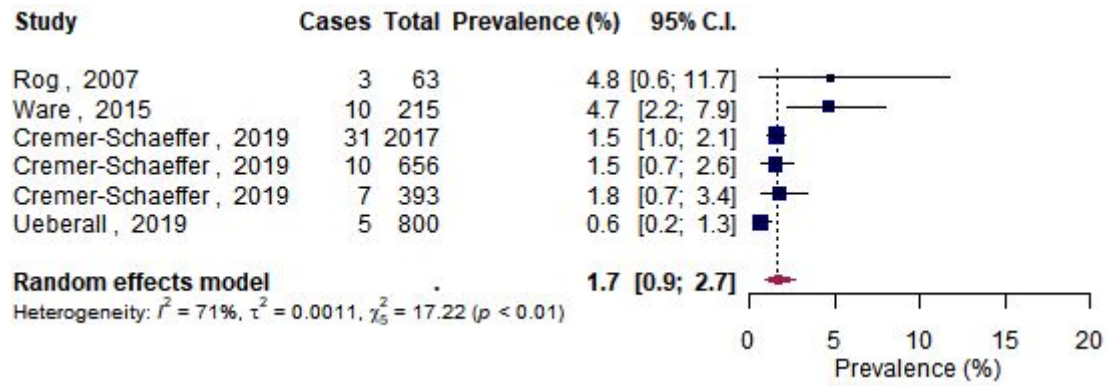

peer review only

## Appendix 20: Results for mania

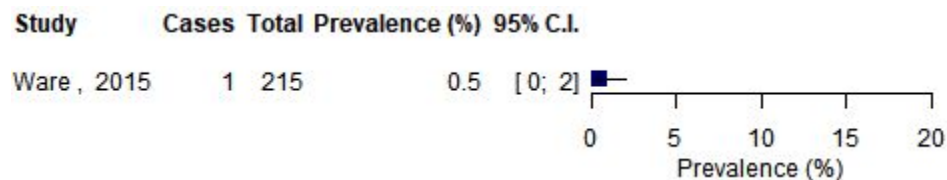

For peer review only

## Appendix 21: Results for hallucinations

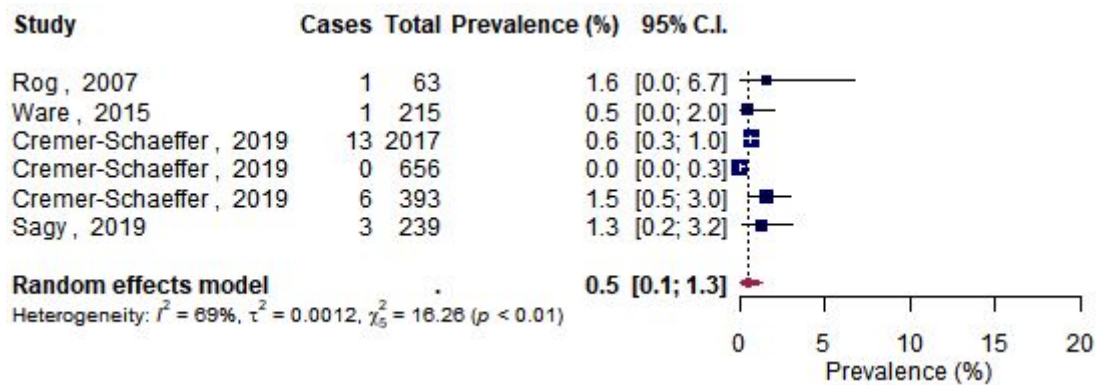

For peer review only

## Appendix 22: Results for delusions

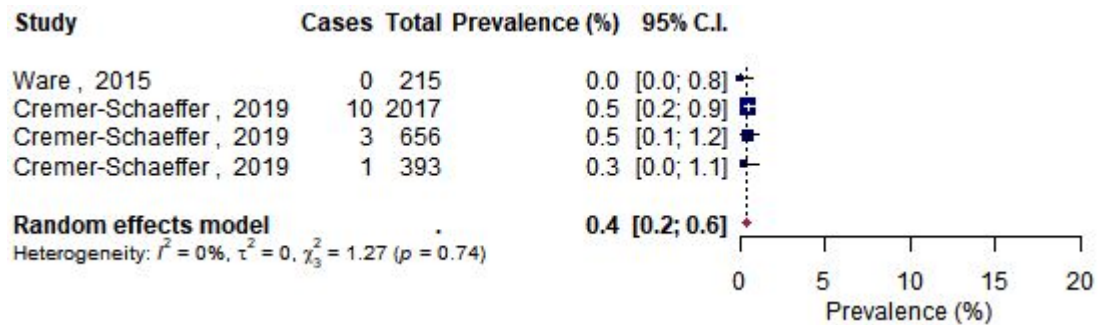

Or peer review only

**Appendix 23: Results for paranoia**

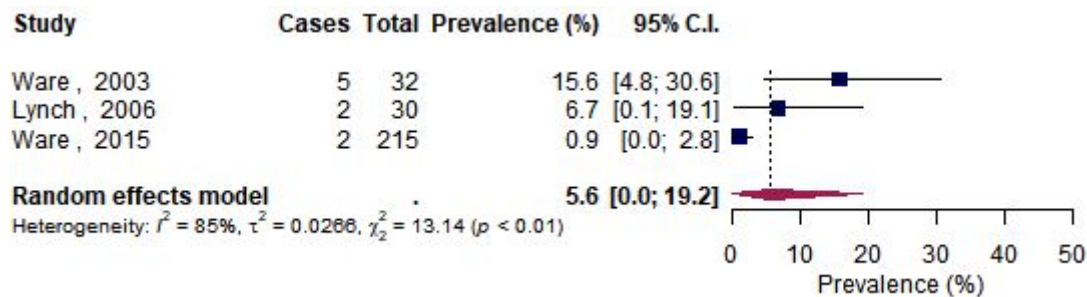

For peer review only

## Appendix 24: Results for anxiety

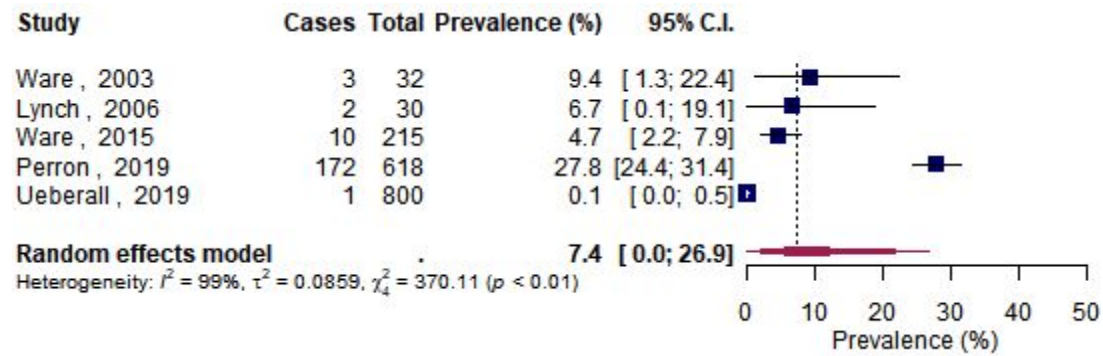

Or peer review only

**Appendix 25: Results for euphoria**

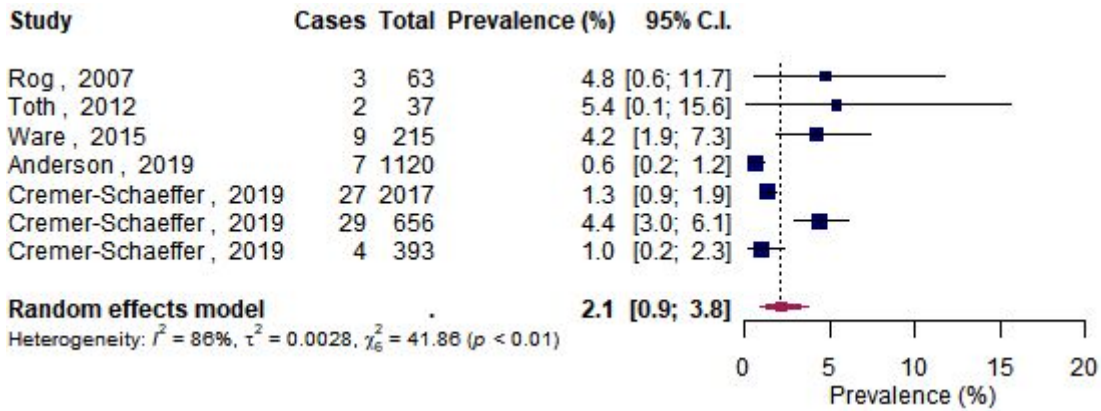

For peer review only



## Appendix 26: Results for memory impairment

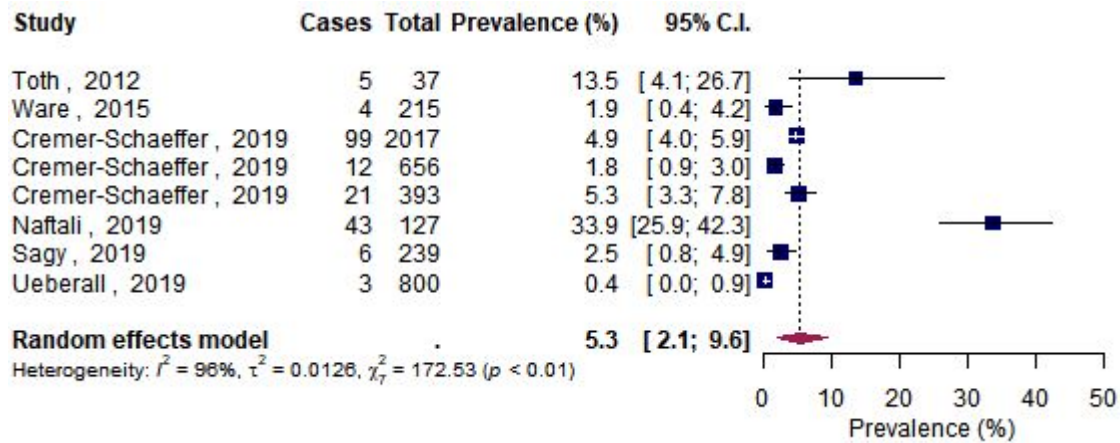

peer review only

**Appendix 27: Results for confusion**

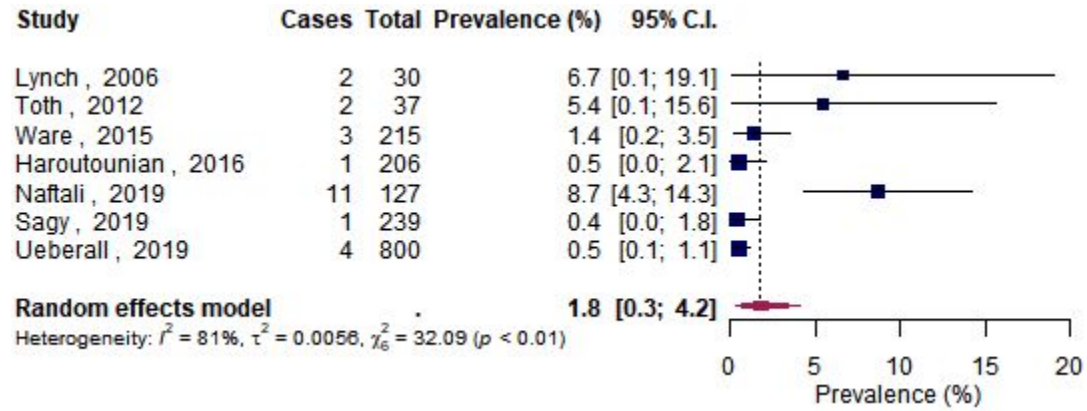

peer review only

## Appendix 28: Results for disorientation

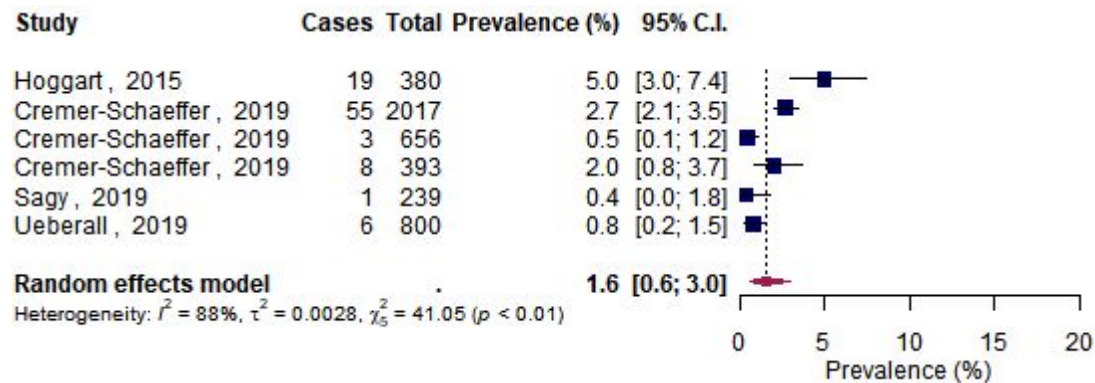

**Appendix 29: Results for impaired attention**

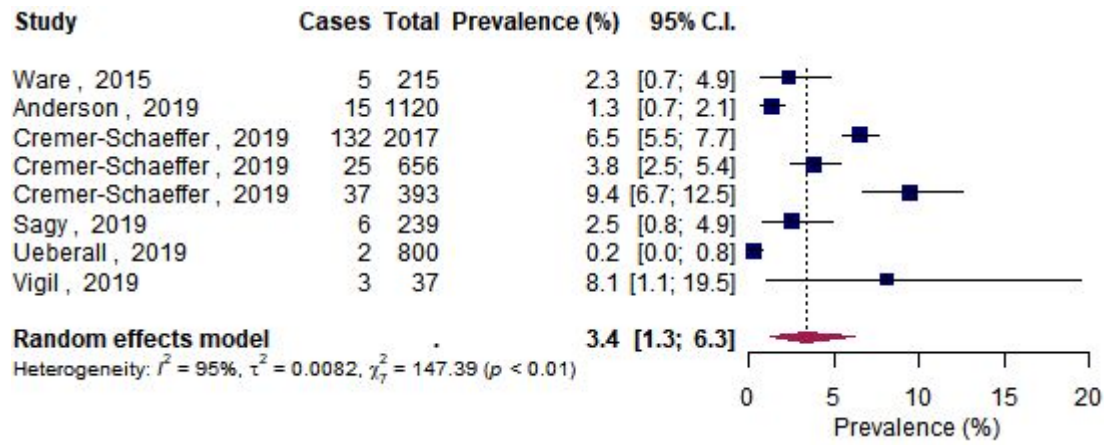

peer review only

### Appendix 30: Results for falls

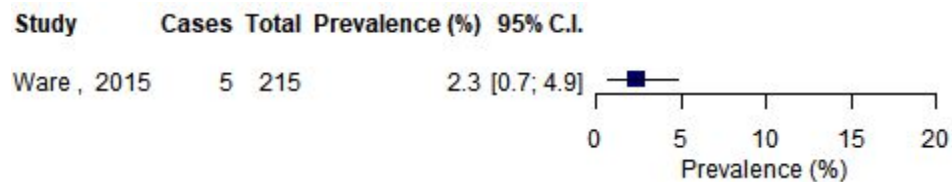

For peer review only

### Appendix 31: Results for motor vehicle accidents

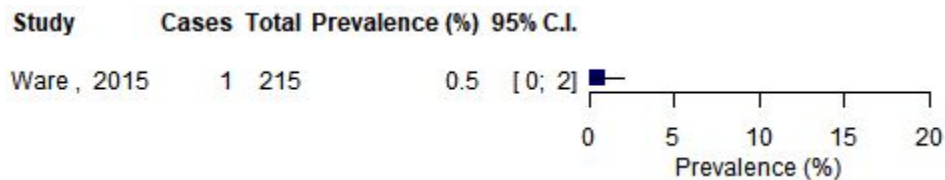

For peer review only

## Appendix 32: Results for dependence

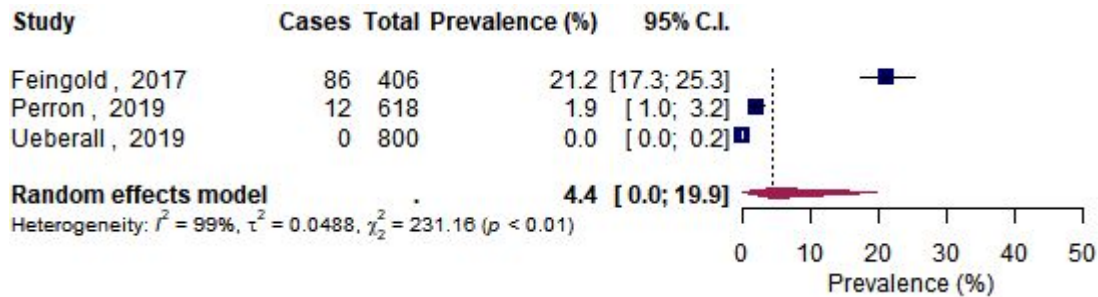

For peer review only

**Appendix 33: Results for withdrawal symptoms**

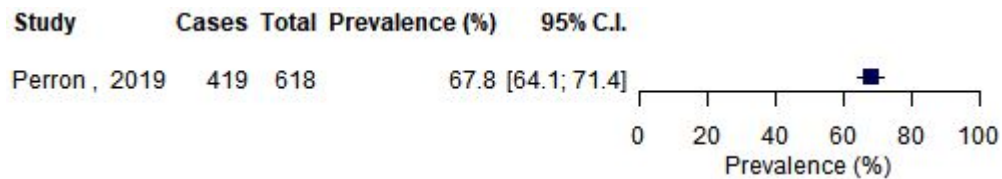

For peer review only



## Appendix 34: Results for withdrawal syndrome

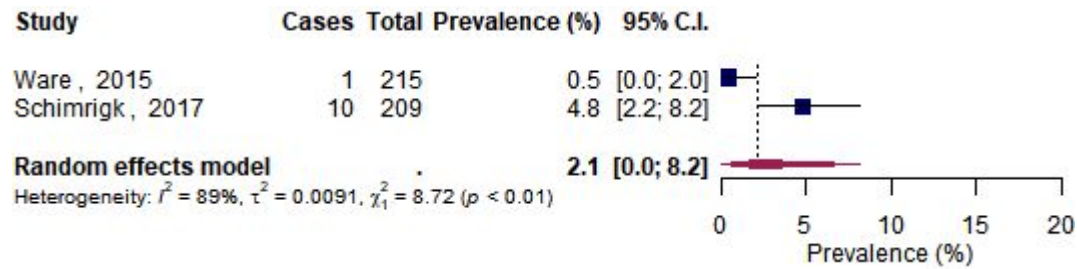

For peer review only

| Section/top<br>ic (page no)                        | Item | PRISMA checklist item                                                                                                                                                                                                                                                                                       | PRISMA<br>harms<br>(minimum)                                                                | Recommendations for reporting<br>harms in systematic reviews<br>(desirable)                                                                                                                                                            | Check<br>if done |
|----------------------------------------------------|------|-------------------------------------------------------------------------------------------------------------------------------------------------------------------------------------------------------------------------------------------------------------------------------------------------------------|---------------------------------------------------------------------------------------------|----------------------------------------------------------------------------------------------------------------------------------------------------------------------------------------------------------------------------------------|------------------|
| <b>Title</b><br>Title (3)                          | 1    | Identify the report as a systematic review, meta-analysis, or both.                                                                                                                                                                                                                                         | Specifically mention “harms” or other related terms, or the harm of interest in the review. | —                                                                                                                                                                                                                                      | X                |
| <b>Abstract</b><br>Structured<br>summary (4)       | 2    | Provide a structured summary including, as applicable: background; objectives; data sources; study eligibility criteria, participants, and interventions; study appraisal and synthesis methods; results; limitations; conclusions and implications of key findings; systematic review registration number. | —                                                                                           | Abstracts should report any analysis of harms undertaken in the review, if harms are a primary or secondary outcome.                                                                                                                   | X                |
| <b>Introduction</b><br>Rationale (5)               | 3    | Describe the rationale for the review in the context of what is already known.                                                                                                                                                                                                                              | —                                                                                           | It should clearly describe in introduction or in methods section which events are considered harms and provide a clear rationale for the specific harm(s), condition(s), and patient group(s) included in the review.                  | X                |
| <b>Objectives</b> (5)                              | 4    | Provide an explicit statement of questions being addressed with reference to participants, interventions, comparisons, outcomes, and study design (PICOS).                                                                                                                                                  | —                                                                                           | PICOS format should be specified, although in systematic reviews of harms the selection criteria for P, C, and O may be very broad (same intervention may have been used for heterogeneous indications in a diverse range of patients) | X                |
| <b>Methods</b><br>Protocol and<br>registration (6) | 5    | Indicate if a review protocol exists, if and where it can be accessed (eg, web address), and, if available, provide registration information including registration number.                                                                                                                                 | —                                                                                           | No specific additional information is required for systematic reviews of harms.                                                                                                                                                        | X                |
| <b>Eligibility<br/>Criteria</b> (6)                | 6    | Specify study characteristics (eg, PICOS, length of follow-up) and report characteristics (eg, years considered, language, publication status) used as criteria for eligibility, giving rationale.                                                                                                          | —                                                                                           | Report how handled relevant studies (based on population and intervention) when the outcomes of interest were not reported.<br>Report choices for specific study designs and length of follow-up.                                      | X                |
| <b>Information<br/>Sources</b> (7)                 | 7    | Describe all information sources (eg, databases with dates of coverage, contact with study authors to identify additional studies) in the search and date last searched.                                                                                                                                    | —                                                                                           | Report if only searched for published data, or also sought data from unpublished sources, from authors, drug manufacturers and regulatory agencies. If includes unpublished data, provide the source and the process of obtaining it.  | X                |
| <b>Search</b> (7)                                  | 8    | Present full electronic search strategy for at least one database, including any limits used, such that it could be repeated.                                                                                                                                                                               | —                                                                                           | If additional searches were used specifically to identify adverse events, authors should present the full search process so it can be replicated.                                                                                      | X                |

|    |                 |    |                                                                                                                                                                                                                        |                                                    |                                                                                                                                                                                                                                                                                                                                                                                                                                                                                                                                                                                     |   |
|----|-----------------|----|------------------------------------------------------------------------------------------------------------------------------------------------------------------------------------------------------------------------|----------------------------------------------------|-------------------------------------------------------------------------------------------------------------------------------------------------------------------------------------------------------------------------------------------------------------------------------------------------------------------------------------------------------------------------------------------------------------------------------------------------------------------------------------------------------------------------------------------------------------------------------------|---|
| 1  |                 |    |                                                                                                                                                                                                                        |                                                    |                                                                                                                                                                                                                                                                                                                                                                                                                                                                                                                                                                                     |   |
| 2  |                 |    |                                                                                                                                                                                                                        |                                                    |                                                                                                                                                                                                                                                                                                                                                                                                                                                                                                                                                                                     |   |
| 3  | Study           | 9  | State the process for selecting studies (ie, screening, eligibility, included in systematic review, and, if applicable, included in the meta-analysis).                                                                | —                                                  | If only included studies reporting on adverse events of interest, defined if screening was based on adverse event reporting in title/abstract or full text. If no harms reported in the text, report if any attempt was made to retrieve relevant data from authors.                                                                                                                                                                                                                                                                                                                | X |
| 4  | Selection (8)   |    |                                                                                                                                                                                                                        |                                                    |                                                                                                                                                                                                                                                                                                                                                                                                                                                                                                                                                                                     |   |
| 5  |                 |    |                                                                                                                                                                                                                        |                                                    |                                                                                                                                                                                                                                                                                                                                                                                                                                                                                                                                                                                     |   |
| 6  |                 |    |                                                                                                                                                                                                                        |                                                    |                                                                                                                                                                                                                                                                                                                                                                                                                                                                                                                                                                                     |   |
| 7  |                 |    |                                                                                                                                                                                                                        |                                                    |                                                                                                                                                                                                                                                                                                                                                                                                                                                                                                                                                                                     |   |
| 8  |                 |    |                                                                                                                                                                                                                        |                                                    |                                                                                                                                                                                                                                                                                                                                                                                                                                                                                                                                                                                     |   |
| 9  |                 |    |                                                                                                                                                                                                                        |                                                    |                                                                                                                                                                                                                                                                                                                                                                                                                                                                                                                                                                                     |   |
| 10 | Data            | 10 | Describe method of data extraction from reports (eg, piloted forms, independently, in duplicate) and any processes for obtaining and confirming data from investigators.                                               | —                                                  | No specific additional information is required for systematic reviews of harms.                                                                                                                                                                                                                                                                                                                                                                                                                                                                                                     | X |
| 11 | collection      |    |                                                                                                                                                                                                                        |                                                    |                                                                                                                                                                                                                                                                                                                                                                                                                                                                                                                                                                                     |   |
| 12 | process (9)     |    |                                                                                                                                                                                                                        |                                                    |                                                                                                                                                                                                                                                                                                                                                                                                                                                                                                                                                                                     |   |
| 13 |                 |    |                                                                                                                                                                                                                        |                                                    |                                                                                                                                                                                                                                                                                                                                                                                                                                                                                                                                                                                     |   |
| 14 | Data            | 11 | List and define all variables for which data were sought (eg, PICOS, funding sources) and any assumptions and simplifications made.                                                                                    | —                                                  | Report the definition of the harm and seriousness used by each included study (if applicable). Report if multiple events occurred in the same individuals, if this information is available. Consider if the harm may be related to factors associated with participants (eg, age, sex, use of medications) or provider (eg, years of practice, level of training). Specify if information was extracted and how it was used in subsequent results. Specify if extracted details regarding the specific methods used to capture harms (active/passive and timing of adverse event). | X |
| 15 | items (9)       |    |                                                                                                                                                                                                                        |                                                    |                                                                                                                                                                                                                                                                                                                                                                                                                                                                                                                                                                                     |   |
| 16 |                 |    |                                                                                                                                                                                                                        |                                                    |                                                                                                                                                                                                                                                                                                                                                                                                                                                                                                                                                                                     |   |
| 17 |                 |    |                                                                                                                                                                                                                        |                                                    |                                                                                                                                                                                                                                                                                                                                                                                                                                                                                                                                                                                     |   |
| 18 |                 |    |                                                                                                                                                                                                                        |                                                    |                                                                                                                                                                                                                                                                                                                                                                                                                                                                                                                                                                                     |   |
| 19 |                 |    |                                                                                                                                                                                                                        |                                                    |                                                                                                                                                                                                                                                                                                                                                                                                                                                                                                                                                                                     |   |
| 20 |                 |    |                                                                                                                                                                                                                        |                                                    |                                                                                                                                                                                                                                                                                                                                                                                                                                                                                                                                                                                     |   |
| 21 |                 |    |                                                                                                                                                                                                                        |                                                    |                                                                                                                                                                                                                                                                                                                                                                                                                                                                                                                                                                                     |   |
| 22 |                 |    |                                                                                                                                                                                                                        |                                                    |                                                                                                                                                                                                                                                                                                                                                                                                                                                                                                                                                                                     |   |
| 23 |                 |    |                                                                                                                                                                                                                        |                                                    |                                                                                                                                                                                                                                                                                                                                                                                                                                                                                                                                                                                     |   |
| 24 |                 |    |                                                                                                                                                                                                                        |                                                    |                                                                                                                                                                                                                                                                                                                                                                                                                                                                                                                                                                                     |   |
| 25 |                 |    |                                                                                                                                                                                                                        |                                                    |                                                                                                                                                                                                                                                                                                                                                                                                                                                                                                                                                                                     |   |
| 26 |                 |    |                                                                                                                                                                                                                        |                                                    |                                                                                                                                                                                                                                                                                                                                                                                                                                                                                                                                                                                     |   |
| 27 |                 |    |                                                                                                                                                                                                                        |                                                    |                                                                                                                                                                                                                                                                                                                                                                                                                                                                                                                                                                                     |   |
| 28 |                 |    |                                                                                                                                                                                                                        |                                                    |                                                                                                                                                                                                                                                                                                                                                                                                                                                                                                                                                                                     |   |
| 29 | Risk of bias in | 12 | Describe methods used for assessing risk of bias of individual studies (including specification of whether this was done at the study or outcome level), and how this information is to be used in any data synthesis. | —                                                  | The risk of bias assessment should be considered separately for outcomes of benefit and harms.                                                                                                                                                                                                                                                                                                                                                                                                                                                                                      | X |
| 30 | individual      |    |                                                                                                                                                                                                                        |                                                    |                                                                                                                                                                                                                                                                                                                                                                                                                                                                                                                                                                                     |   |
| 31 | studies (10)    |    |                                                                                                                                                                                                                        |                                                    |                                                                                                                                                                                                                                                                                                                                                                                                                                                                                                                                                                                     |   |
| 32 |                 |    |                                                                                                                                                                                                                        |                                                    |                                                                                                                                                                                                                                                                                                                                                                                                                                                                                                                                                                                     |   |
| 33 |                 |    |                                                                                                                                                                                                                        |                                                    |                                                                                                                                                                                                                                                                                                                                                                                                                                                                                                                                                                                     |   |
| 34 |                 |    |                                                                                                                                                                                                                        |                                                    |                                                                                                                                                                                                                                                                                                                                                                                                                                                                                                                                                                                     |   |
| 35 | Summary         | 13 | State the principal summary measures (eg, risk ratio, difference in means).                                                                                                                                            | —                                                  | No specific additional information is required for systematic reviews of harms.                                                                                                                                                                                                                                                                                                                                                                                                                                                                                                     | X |
| 36 | measures (11)   |    |                                                                                                                                                                                                                        |                                                    |                                                                                                                                                                                                                                                                                                                                                                                                                                                                                                                                                                                     |   |
| 37 |                 |    |                                                                                                                                                                                                                        |                                                    |                                                                                                                                                                                                                                                                                                                                                                                                                                                                                                                                                                                     |   |
| 38 | Synthesis of    | 14 | Describe the methods of handling data and combining results of studies, if done, including measures of consistency (eg, $I^2$ ) for each meta-analysis.                                                                | Specify how zero events were handled, if relevant. |                                                                                                                                                                                                                                                                                                                                                                                                                                                                                                                                                                                     |   |
| 39 | results (11)    |    |                                                                                                                                                                                                                        |                                                    |                                                                                                                                                                                                                                                                                                                                                                                                                                                                                                                                                                                     |   |
| 40 |                 |    |                                                                                                                                                                                                                        |                                                    |                                                                                                                                                                                                                                                                                                                                                                                                                                                                                                                                                                                     |   |
| 41 | Risk of bias    | 15 | Specify any assessment of risk of bias that may affect the cumulative evidence (eg, publication bias, selective reporting within studies).                                                                             | —                                                  | Present the extent of missing information (studies without harms outcomes), any factors that may account for their absence, and whether these reasons may be related to the results.                                                                                                                                                                                                                                                                                                                                                                                                | X |
| 42 | across studies  |    |                                                                                                                                                                                                                        |                                                    |                                                                                                                                                                                                                                                                                                                                                                                                                                                                                                                                                                                     |   |
| 43 | (11)            |    |                                                                                                                                                                                                                        |                                                    |                                                                                                                                                                                                                                                                                                                                                                                                                                                                                                                                                                                     |   |
| 44 |                 |    |                                                                                                                                                                                                                        |                                                    |                                                                                                                                                                                                                                                                                                                                                                                                                                                                                                                                                                                     |   |
| 45 |                 |    |                                                                                                                                                                                                                        |                                                    |                                                                                                                                                                                                                                                                                                                                                                                                                                                                                                                                                                                     |   |
| 46 | Additional      | 16 | Describe methods of additional analyses (eg, sensitivity or subgroup analyses, meta-regression), if done, indicating which were prespecified.                                                                          | —                                                  | Sensitivity analyses may be affected by different definitions, grading, and attribution of adverse events, as adverse events are typically infrequent or reported using heterogeneous classifications. Report the number of participants and studies included in each subgroup.                                                                                                                                                                                                                                                                                                     | X |
| 47 | analyses (12)   |    |                                                                                                                                                                                                                        |                                                    |                                                                                                                                                                                                                                                                                                                                                                                                                                                                                                                                                                                     |   |
| 48 |                 |    |                                                                                                                                                                                                                        |                                                    |                                                                                                                                                                                                                                                                                                                                                                                                                                                                                                                                                                                     |   |
| 49 |                 |    |                                                                                                                                                                                                                        |                                                    |                                                                                                                                                                                                                                                                                                                                                                                                                                                                                                                                                                                     |   |
| 50 |                 |    |                                                                                                                                                                                                                        |                                                    |                                                                                                                                                                                                                                                                                                                                                                                                                                                                                                                                                                                     |   |
| 51 |                 |    |                                                                                                                                                                                                                        |                                                    |                                                                                                                                                                                                                                                                                                                                                                                                                                                                                                                                                                                     |   |
| 52 | Results         |    |                                                                                                                                                                                                                        |                                                    |                                                                                                                                                                                                                                                                                                                                                                                                                                                                                                                                                                                     |   |
| 53 | Study           | 17 | Give numbers of studies screened, assessed for eligibility, and included in the review, with reasons for exclusions at each                                                                                            | —                                                  | If a review addresses both efficacy and harms, display a flow diagram specific for each (efficacy and harm).                                                                                                                                                                                                                                                                                                                                                                                                                                                                        | X |
| 54 | selection (13)  |    |                                                                                                                                                                                                                        |                                                    |                                                                                                                                                                                                                                                                                                                                                                                                                                                                                                                                                                                     |   |
| 55 |                 |    |                                                                                                                                                                                                                        |                                                    |                                                                                                                                                                                                                                                                                                                                                                                                                                                                                                                                                                                     |   |
| 56 |                 |    |                                                                                                                                                                                                                        |                                                    |                                                                                                                                                                                                                                                                                                                                                                                                                                                                                                                                                                                     |   |
| 57 |                 |    |                                                                                                                                                                                                                        |                                                    |                                                                                                                                                                                                                                                                                                                                                                                                                                                                                                                                                                                     |   |
| 58 |                 |    |                                                                                                                                                                                                                        |                                                    |                                                                                                                                                                                                                                                                                                                                                                                                                                                                                                                                                                                     |   |
| 59 |                 |    |                                                                                                                                                                                                                        |                                                    |                                                                                                                                                                                                                                                                                                                                                                                                                                                                                                                                                                                     |   |
| 60 |                 |    |                                                                                                                                                                                                                        |                                                    |                                                                                                                                                                                                                                                                                                                                                                                                                                                                                                                                                                                     |   |

|    |                                    |                                                                                                                                                                                                             |                                                                                                                    |                                                                                                                                                                                                                                                                                                                                          |   |
|----|------------------------------------|-------------------------------------------------------------------------------------------------------------------------------------------------------------------------------------------------------------|--------------------------------------------------------------------------------------------------------------------|------------------------------------------------------------------------------------------------------------------------------------------------------------------------------------------------------------------------------------------------------------------------------------------------------------------------------------------|---|
| 1  |                                    |                                                                                                                                                                                                             |                                                                                                                    |                                                                                                                                                                                                                                                                                                                                          |   |
| 2  |                                    |                                                                                                                                                                                                             |                                                                                                                    |                                                                                                                                                                                                                                                                                                                                          |   |
| 3  |                                    | stage, ideally with a flow diagram.                                                                                                                                                                         |                                                                                                                    |                                                                                                                                                                                                                                                                                                                                          |   |
| 4  |                                    |                                                                                                                                                                                                             |                                                                                                                    |                                                                                                                                                                                                                                                                                                                                          |   |
| 5  |                                    |                                                                                                                                                                                                             |                                                                                                                    |                                                                                                                                                                                                                                                                                                                                          |   |
| 6  | Study characteristics (14)         | 18 For each study, present characteristics for which data were extracted (eg, study size, PICOS, follow-up period) and provide the citations.                                                               | Define each harm addressed, how it was ascertained (eg, patient report, active search), and over what time period. | Add additional characteristics to: “P” (population) patient risk factors that were considered as possibly affecting the risk of the harm outcome. “I” (intervention) professional expertise/skills if relevant (for example if the intervention is a procedure). “T” (time) timing of all harms assessments and the length of follow-up. | X |
| 7  |                                    |                                                                                                                                                                                                             |                                                                                                                    |                                                                                                                                                                                                                                                                                                                                          |   |
| 8  |                                    |                                                                                                                                                                                                             |                                                                                                                    |                                                                                                                                                                                                                                                                                                                                          |   |
| 9  |                                    |                                                                                                                                                                                                             |                                                                                                                    |                                                                                                                                                                                                                                                                                                                                          |   |
| 10 |                                    |                                                                                                                                                                                                             |                                                                                                                    |                                                                                                                                                                                                                                                                                                                                          |   |
| 11 |                                    |                                                                                                                                                                                                             |                                                                                                                    |                                                                                                                                                                                                                                                                                                                                          |   |
| 12 |                                    |                                                                                                                                                                                                             |                                                                                                                    |                                                                                                                                                                                                                                                                                                                                          |   |
| 13 | Risk of bias within studies (15)   | 19 Present data on risk of bias of each study and, if available, any outcome level assessment (see item 12).                                                                                                | —                                                                                                                  | Consider the possible sources of biases that could affect the specific harm under consideration within the review. Sample selection, dropouts and measurement of adverse events should be evaluated separately from the outcomes of benefit as described in item 12, above.                                                              | X |
| 14 |                                    |                                                                                                                                                                                                             |                                                                                                                    |                                                                                                                                                                                                                                                                                                                                          |   |
| 15 |                                    |                                                                                                                                                                                                             |                                                                                                                    |                                                                                                                                                                                                                                                                                                                                          |   |
| 16 |                                    |                                                                                                                                                                                                             |                                                                                                                    |                                                                                                                                                                                                                                                                                                                                          |   |
| 17 |                                    |                                                                                                                                                                                                             |                                                                                                                    |                                                                                                                                                                                                                                                                                                                                          |   |
| 18 |                                    |                                                                                                                                                                                                             |                                                                                                                    |                                                                                                                                                                                                                                                                                                                                          |   |
| 19 |                                    |                                                                                                                                                                                                             |                                                                                                                    |                                                                                                                                                                                                                                                                                                                                          |   |
| 20 | Results of individual studies (16) | 20 For all outcomes considered (benefits or harms), present, for each study: (a) simple summary data for each intervention group (b) effect estimates and confidence intervals, ideally with a forest plot. | —                                                                                                                  | Report the actual numbers of adverse events in each study, separately for each intervention.                                                                                                                                                                                                                                             | X |
| 21 | Synthesis of results (17)          | 21 Present results of each meta-analysis done, including confidence intervals and measures of consistency.                                                                                                  | Describe any assessment of possible causality.                                                                     | If included data from unpublished sources, report clearly the data source and the impact of these studies to the final systematic review.                                                                                                                                                                                                | X |
| 22 | Risk of bias across studies (18)   | 22 Present results of any assessment of risk of bias across studies (see item 15).                                                                                                                          | —                                                                                                                  | No specific additional information is required for systematic reviews of harms. See item 15 above.                                                                                                                                                                                                                                       | X |
| 23 | Additional analysis (18)           | 23 Give results of additional analyses, if done (eg, sensitivity or subgroup analyses, meta-regression (see item 16)).                                                                                      | —                                                                                                                  | No specific additional information is required for systematic reviews of harms.                                                                                                                                                                                                                                                          | X |
| 24 | Discussion                         |                                                                                                                                                                                                             |                                                                                                                    |                                                                                                                                                                                                                                                                                                                                          |   |
| 25 | Summary of evidence (18)           | 24 Summarise the main findings including the strength of evidence for each main outcome; consider their relevance to key groups (eg, healthcare providers, users, and policy makers).                       | —                                                                                                                  | No specific additional information is required for systematic reviews of harms.                                                                                                                                                                                                                                                          | X |
| 26 | Limitations (18)                   | 25 Discuss limitations at study and outcome level (eg, risk of bias), and at review level (eg, incomplete retrieval of identified research, reporting bias).                                                | —                                                                                                                  | Recognise possible limitations of meta-analysis for rare adverse events (ie, quality and quantity of data), issues noted previously related to collection and reporting.                                                                                                                                                                 | X |
| 27 | Conclusions (18)                   | 26 Provide a general interpretation of the results in the context of other evidence, and implications for future research.                                                                                  | —                                                                                                                  | State conclusions in coherence with the review findings. When adverse events were not identified we caution against the conclusion that the intervention is “safe,” when, in reality, its safety remains unknown.                                                                                                                        | X |
| 28 |                                    |                                                                                                                                                                                                             |                                                                                                                    |                                                                                                                                                                                                                                                                                                                                          |   |
| 29 |                                    |                                                                                                                                                                                                             |                                                                                                                    |                                                                                                                                                                                                                                                                                                                                          |   |
| 30 |                                    |                                                                                                                                                                                                             |                                                                                                                    |                                                                                                                                                                                                                                                                                                                                          |   |
| 31 |                                    |                                                                                                                                                                                                             |                                                                                                                    |                                                                                                                                                                                                                                                                                                                                          |   |
| 32 |                                    |                                                                                                                                                                                                             |                                                                                                                    |                                                                                                                                                                                                                                                                                                                                          |   |
| 33 |                                    |                                                                                                                                                                                                             |                                                                                                                    |                                                                                                                                                                                                                                                                                                                                          |   |
| 34 |                                    |                                                                                                                                                                                                             |                                                                                                                    |                                                                                                                                                                                                                                                                                                                                          |   |
| 35 |                                    |                                                                                                                                                                                                             |                                                                                                                    |                                                                                                                                                                                                                                                                                                                                          |   |
| 36 |                                    |                                                                                                                                                                                                             |                                                                                                                    |                                                                                                                                                                                                                                                                                                                                          |   |
| 37 |                                    |                                                                                                                                                                                                             |                                                                                                                    |                                                                                                                                                                                                                                                                                                                                          |   |
| 38 |                                    |                                                                                                                                                                                                             |                                                                                                                    |                                                                                                                                                                                                                                                                                                                                          |   |
| 39 |                                    |                                                                                                                                                                                                             |                                                                                                                    |                                                                                                                                                                                                                                                                                                                                          |   |
| 40 |                                    |                                                                                                                                                                                                             |                                                                                                                    |                                                                                                                                                                                                                                                                                                                                          |   |
| 41 |                                    |                                                                                                                                                                                                             |                                                                                                                    |                                                                                                                                                                                                                                                                                                                                          |   |
| 42 |                                    |                                                                                                                                                                                                             |                                                                                                                    |                                                                                                                                                                                                                                                                                                                                          |   |
| 43 |                                    |                                                                                                                                                                                                             |                                                                                                                    |                                                                                                                                                                                                                                                                                                                                          |   |
| 44 |                                    |                                                                                                                                                                                                             |                                                                                                                    |                                                                                                                                                                                                                                                                                                                                          |   |
| 45 |                                    |                                                                                                                                                                                                             |                                                                                                                    |                                                                                                                                                                                                                                                                                                                                          |   |
| 46 |                                    |                                                                                                                                                                                                             |                                                                                                                    |                                                                                                                                                                                                                                                                                                                                          |   |
| 47 |                                    |                                                                                                                                                                                                             |                                                                                                                    |                                                                                                                                                                                                                                                                                                                                          |   |
| 48 |                                    |                                                                                                                                                                                                             |                                                                                                                    |                                                                                                                                                                                                                                                                                                                                          |   |
| 49 |                                    |                                                                                                                                                                                                             |                                                                                                                    |                                                                                                                                                                                                                                                                                                                                          |   |
| 50 |                                    |                                                                                                                                                                                                             |                                                                                                                    |                                                                                                                                                                                                                                                                                                                                          |   |
| 51 | Funding (19)                       | 27 Describe sources of funding for the systematic review and other support (eg, supply of data); role of funders for the systematic review.                                                                 | —                                                                                                                  | No specific additional information is required for systematic reviews of harms.                                                                                                                                                                                                                                                          | X |
| 52 |                                    |                                                                                                                                                                                                             |                                                                                                                    |                                                                                                                                                                                                                                                                                                                                          |   |
| 53 |                                    |                                                                                                                                                                                                             |                                                                                                                    |                                                                                                                                                                                                                                                                                                                                          |   |
| 54 |                                    |                                                                                                                                                                                                             |                                                                                                                    |                                                                                                                                                                                                                                                                                                                                          |   |
| 55 |                                    |                                                                                                                                                                                                             |                                                                                                                    |                                                                                                                                                                                                                                                                                                                                          |   |
| 56 |                                    |                                                                                                                                                                                                             |                                                                                                                    |                                                                                                                                                                                                                                                                                                                                          |   |
| 57 |                                    |                                                                                                                                                                                                             |                                                                                                                    |                                                                                                                                                                                                                                                                                                                                          |   |
| 58 |                                    |                                                                                                                                                                                                             |                                                                                                                    |                                                                                                                                                                                                                                                                                                                                          |   |
| 59 |                                    |                                                                                                                                                                                                             |                                                                                                                    |                                                                                                                                                                                                                                                                                                                                          |   |
| 60 |                                    |                                                                                                                                                                                                             |                                                                                                                    |                                                                                                                                                                                                                                                                                                                                          |   |

# BMJ Open

## Long-term and serious harms of medical cannabis and cannabinoids for chronic pain: A systematic review of non-randomized studies

|                                 |                                                                                                                                                                                                                                                                                                                                                                                                                                                                                                                                                                                                                                                                                                                                                                                                                                                                                                                                                                                                                                                                                                                                                                                                                                                                                                                                                             |
|---------------------------------|-------------------------------------------------------------------------------------------------------------------------------------------------------------------------------------------------------------------------------------------------------------------------------------------------------------------------------------------------------------------------------------------------------------------------------------------------------------------------------------------------------------------------------------------------------------------------------------------------------------------------------------------------------------------------------------------------------------------------------------------------------------------------------------------------------------------------------------------------------------------------------------------------------------------------------------------------------------------------------------------------------------------------------------------------------------------------------------------------------------------------------------------------------------------------------------------------------------------------------------------------------------------------------------------------------------------------------------------------------------|
| Journal:                        | <i>BMJ Open</i>                                                                                                                                                                                                                                                                                                                                                                                                                                                                                                                                                                                                                                                                                                                                                                                                                                                                                                                                                                                                                                                                                                                                                                                                                                                                                                                                             |
| Manuscript ID                   | bmjopen-2021-054282.R1                                                                                                                                                                                                                                                                                                                                                                                                                                                                                                                                                                                                                                                                                                                                                                                                                                                                                                                                                                                                                                                                                                                                                                                                                                                                                                                                      |
| Article Type:                   | Original research                                                                                                                                                                                                                                                                                                                                                                                                                                                                                                                                                                                                                                                                                                                                                                                                                                                                                                                                                                                                                                                                                                                                                                                                                                                                                                                                           |
| Date Submitted by the Author:   | 03-May-2022                                                                                                                                                                                                                                                                                                                                                                                                                                                                                                                                                                                                                                                                                                                                                                                                                                                                                                                                                                                                                                                                                                                                                                                                                                                                                                                                                 |
| Complete List of Authors:       | Zeraatkar, Dena; McMaster University, Health Research Methods, Evidence, and Impact; Harvard Medical School, Department of Biomedical Informatics<br>Cooper, Matthew; McMaster University, Michael G. Degroote School of Medicine<br>Agarwal, Arnav; University of Toronto, Department of Medicine<br>Vernooij, Robin; Comprehensive Cancer Centre Netherlands Location Groningen<br>Leung, Gareth; University of Cambridge, Department of Public Health and Primary Care<br>Loniewski, Kevin; York University, Faculty of Health<br>Dookie, Jared E ; Western University, Schulich School of Medicine and Dentistry<br>Ahmed, Muhammad Muneeb; McMaster University, Michael G. Degroote School of Medicine<br>Hong, Brian Y; University of Toronto, Division of Plastic and Reconstructive Surgery<br>Hong, Christopher; University of Toronto Faculty of Medicine, Health Research Methods, Evidence, and Impact<br>Hong, Patrick; University of Toronto, Department of Anesthesiology and Pain Medicine<br>Couban, Rachel; McMaster University, Michael G. DeGroot Institute for Pain Research and Care<br>Agoritsas, Thomas; McMaster University, Department of Clinical Epidemiology and Biostatistics; University Hospitals Geneva, Division of General Internal Medicine & Division of Epidemiology<br>Busse, Jason; McMaster University, Anesthesia |
| <b>Primary Subject Heading</b>: | Medical management                                                                                                                                                                                                                                                                                                                                                                                                                                                                                                                                                                                                                                                                                                                                                                                                                                                                                                                                                                                                                                                                                                                                                                                                                                                                                                                                          |
| Secondary Subject Heading:      | Anaesthesia, Medical management                                                                                                                                                                                                                                                                                                                                                                                                                                                                                                                                                                                                                                                                                                                                                                                                                                                                                                                                                                                                                                                                                                                                                                                                                                                                                                                             |
| Keywords:                       | Pain management < ANAESTHETICS, PAIN MANAGEMENT, PRIMARY CARE                                                                                                                                                                                                                                                                                                                                                                                                                                                                                                                                                                                                                                                                                                                                                                                                                                                                                                                                                                                                                                                                                                                                                                                                                                                                                               |
|                                 |                                                                                                                                                                                                                                                                                                                                                                                                                                                                                                                                                                                                                                                                                                                                                                                                                                                                                                                                                                                                                                                                                                                                                                                                                                                                                                                                                             |

1  
2  
3  
4  
5  
6  
7  
8  
9  
10  
11  
12  
13  
14  
15  
16  
17  
18  
19  
20  
21  
22  
23  
24  
25  
26  
27  
28  
29  
30  
31  
32  
33  
34  
35  
36  
37  
38  
39  
40  
41  
42  
43  
44  
45  
46  
47  
48  
49  
50  
51  
52  
53  
54  
55  
56  
57  
58  
59  
60

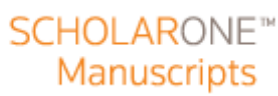

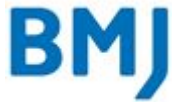

I, the Submitting Author has the right to grant and does grant on behalf of all authors of the Work (as defined in the below author licence), an exclusive licence and/or a non-exclusive licence for contributions from authors who are: i) UK Crown employees; ii) where BMJ has agreed a CC-BY licence shall apply, and/or iii) in accordance with the terms applicable for US Federal Government officers or employees acting as part of their official duties; on a worldwide, perpetual, irrevocable, royalty-free basis to BMJ Publishing Group Ltd ("BMJ") its licensees and where the relevant Journal is co-owned by BMJ to the co-owners of the Journal, to publish the Work in this journal and any other BMJ products and to exploit all rights, as set out in our [licence](#).

The Submitting Author accepts and understands that any supply made under these terms is made by BMJ to the Submitting Author unless you are acting as an employee on behalf of your employer or a postgraduate student of an affiliated institution which is paying any applicable article publishing charge ("APC") for Open Access articles. Where the Submitting Author wishes to make the Work available on an Open Access basis (and intends to pay the relevant APC), the terms of reuse of such Open Access shall be governed by a Creative Commons licence – details of these licences and which [Creative Commons](#) licence will apply to this Work are set out in our licence referred to above.

Other than as permitted in any relevant BMJ Author's Self Archiving Policies, I confirm this Work has not been accepted for publication elsewhere, is not being considered for publication elsewhere and does not duplicate material already published. I confirm all authors consent to publication of this Work and authorise the granting of this licence.

1  
2  
3 **1 Long-term and serious harms of medical cannabis and cannabinoids for chronic pain: A**  
4  
5 **2 systematic review of non-randomized studies**  
6  
7

8 **3 Dena Zeraatkar, *methodologist***

9 *Department of Health Research Methods, Evidence, and Impact, McMaster University, Hamilton, ON*

10 *Department of Biomedical Informatics, Harvard Medical School, Boston, MA*

11 **6 Matthew Adam Cooper, *medical student***

12 *Michael G. Degroote School of Medicine*

13 *McMaster University, Hamilton, ON*

14 **9 Arnav Agarwal, *resident physician***

15 *Department of Medicine*

16 *University of Toronto, Toronto, ON*

17 **12 Robin W. M. Vernooij, *methodologist***

18 *Netherlands Comprehensive Cancer Organization (IKNL)*

19 *Utrecht, the Netherlands*

20 **15 Gareth Leung, *methodologist***

21 *Department of Public Health and Primary Care,*

22 *University of Cambridge, Cambridge, UK*

23 **18 Kevin Loniewski, *nursing student***

24 *Faculty of Health, Seneca College, King City, ON.*

25 *York University, Toronto, ON*

26 **21 Jared E. Dookie, *medical student***

27 *Schulich School of Medicine and Dentistry*

28 *Western University, London, ON*

29 **24 Muhammad Muneeb Ahmed, *medical student***

30 *Michael G. Degroote School of Medicine*

31 *McMaster University, Hamilton, ON*

32 **27 Brian Younho Hong, *resident physician***

33 *Division of Plastic and Reconstructive Surgery*

34 *University of Toronto, Toronto, ON*

35 **30 Chris J. Hong, *resident physician***

36 *Department of Otolaryngology-Head & Neck Surgery*

37 *University of Toronto, Toronto, ON*

38 **33 Patrick Jiho Hong, *resident physician***

39 *Department of Anesthesiology and Pain Medicine*

40 *University of Toronto, Toronto, ON*

41 **36 Rachel Couban, *medical librarian***

42 *Department of Anesthesia*

43 *Department of Health Research Methods, Evidence, and Impact*

44 *McMaster University, Hamilton, ON*

45 **40 Thomas Agoritsas, *assistant professor***

46 *Department Medicine, University Hospitals of Geneva, Geneva, Switzerland*

47 *Department of Health Research Methods, Evidence, and Impact, McMaster University, Hamilton, ON*

48 **43 Jason W. Busse, *associate professor\****

49 *Department of Anesthesia*

50 *Department of Health Research Methods, Evidence, and Impact*

51 *McMaster University, Hamilton, ON*

52 *bussejw@mcmaster.ca*

53  
54 **49 \*Corresponding author**  
55  
56 **50**  
57  
58  
59  
60



1  
2  
3 51 **Running head:** Harms of medical cannabis  
4

5 52  
6 53 **Abbreviations:** Cochrane Central Register of Controlled Trials (CENTRAL), Palmitoylethanolamide (PEA),  
7 tetrahydrocannabinol (THC)  
8  
9

10 55  
11 56 **Keywords:** Medical cannabis, chronic pain, adverse events, harms, non-randomized studies,  
12 observational, systematic review, meta-analysis  
13  
14

15 58  
16 59 **Competing Interests:** There are no competing interests for any author  
17  
18

19 60  
20 61 **Funding:** DZ is supported by a Banting Postdoctoral Fellowship.  
21  
22

23 63 **Ethics approval:** The systematic review is exempt from ethics approval.  
24  
25

26 65 **Data:** Data are available in a public, open access repository: <https://osf.io/ut36z/>  
27  
28

29 66  
30 67 **Acknowledgements:** We thank the members of the Rapid Recommendations panel for critical feedback  
31 on the selection of the adverse events of interest. We thank James MacKillop, PhD, for his guidance  
32 regarding the interpretation of problematic cannabis use, abuse, dependence and withdrawal syndrome  
33 within studies included in our review.  
34  
35

36 71  
37 72 **Data Sharing:** Data on all other adverse events not included in our review, but reported in primary studies,  
38 are available in an open-access database (<https://osf.io/ut36z/>).  
39  
40

41 74  
42 75 **Authors' Contributions:** JWB and TA conceived the idea. RC designed and conducted the search. DZ, MAC,  
43 AA, RWMV, GL, KL, JED, MMA, BYH, CH, and PJH screened search records, extracted data, and assessed  
44 the risk of bias of the eligible studies. DZ conducted all analyses. DZ, JWB, and TA interpreted the data. DZ  
45 wrote the first draft of the manuscript. JWB and TA critically revised the manuscript. All authors reviewed  
46 and approved the final version. DZ and JWB are the guarantors.  
47  
48

49 79  
50 80 \* I, the Submitting Author, have the right to grant and does grant on behalf of all authors of the Work (as  
51 defined in the author licence), an exclusive licence and/or a non-exclusive licence for contributions from  
52 authors who are: i) UK Crown employees; ii) where BMJ has agreed a CC-BY licence shall apply, and/or iii)  
53  
54  
55  
56

1  
2  
3  
4  
5  
6  
7  
8  
9  
10  
11  
12  
13  
14  
15  
16  
17  
18  
19  
20  
21  
22  
23  
24  
25  
26  
27  
28  
29  
30  
31  
32  
33  
34  
35  
36  
37  
38  
39  
40  
41  
42  
43  
44  
45  
46  
47  
48  
49  
50  
51  
52  
53  
54  
55  
56  
57  
58  
59  
60

83 in accordance with the terms applicable for US Federal Government officers or employees acting as part  
84 of their official duties; on a worldwide, perpetual, irrevocable, royalty-free basis to BMJ Publishing Group  
85 Ltd (“BMJ”) its licensees.

86

87 Word count: 5,811

For peer review only

1  
2  
3 **88 Abstract**  
4

5  
6 **89 Objective:** To establish the prevalence of long-term and serious harms of medical cannabis for chronic  
7  
8 **90 pain.**

9  
10 **91 Design:** Systematic review and meta-analysis.  
11

12  
13 **92 Data sources:** MEDLINE, EMBASE, PsycInfo, and CENTRAL from inception to April 1, 2020.  
14

15  
16 **93 Study selection:** Non-randomized studies reporting on harms of medical cannabis or cannabinoids in  
17  
18 **94 adults or children living with chronic pain with  $\geq 4$  weeks of follow-up.**

19  
20 **95 Data extraction and synthesis:** A parallel guideline panel provided input on the design and interpretation  
21  
22 **96 of the systematic review, including selection of adverse events for consideration. Two reviewers, working**  
23  
24 **97 independently and in duplicate, screened the search results, extracted data, and assessed risk of bias. We**  
25  
26 **98 used random-effects models for all meta-analyses and the GRADE approach to evaluate the certainty of**  
27  
28 **99 evidence.**

29  
30 **100 Results:** We identified 39 eligible studies that enrolled 12,143 adult patients with chronic pain. Very low  
31  
32 **101 certainty evidence suggests that adverse events are common (prevalence: 26.0%; 95% CI 13.2 to 41.2)**  
33  
34 **102 among users of medical cannabis for chronic pain, particularly any psychiatric adverse events (prevalence:**  
35  
36 **103 13.5%; 95% CI 2.6 to 30.6). Very low certainty evidence, however, indicates serious adverse events,**  
37  
38 **104 adverse events leading to discontinuation, cognitive adverse events, accidents and injuries, and**  
39  
40 **105 dependence and withdrawal syndrome are less common and each typically occur in fewer than one in 20**  
41  
42 **106 patients. We compared studies with  $< 24$  weeks and  $\geq 24$  weeks of cannabis use and found more adverse**  
43  
44 **107 events reported among studies with longer follow-up (test for interaction  $p < 0.01$ ).**  
45  
46 **108 Palmitoylethanolamide was usually associated with few to no adverse events. We found insufficient**  
47  
48 **109 evidence addressing the harms of medical cannabis compared to other pain management options, such**  
49  
50 **110 as opioids.**

51  
52 **111 Conclusions:** There is very low certainty evidence that adverse events are common among people living  
53  
54 **112 with chronic pain who use medical cannabis or cannabinoids, but that few patients experience serious**  
55  
56 **113 adverse events.**

57  
58 **114 Systematic review registration** <https://osf.io/25bxf>  
59  
60

1  
2  
3 115 ***Strengths and limitations of this study***  
4

- 5 116 • Strengths of this systematic review include a comprehensive search for non-randomized studies,  
6 117 explicit eligibility criteria, screening of studies and collection of data in duplicate to increase  
7 118 reliability, and use of the GRADE approach to evaluate the certainty of evidence.  
8  
9 119 • Our review is limited by the non-comparative design of most studies, which precludes confident  
10 120 inferences regarding the proportion of adverse events that can be attributed to medical cannabis or  
11 121 cannabinoids.  
12  
13 122 • A third of studies were at high risk of selection bias, primarily because they included prevalent  
14 123 cannabis users. In such studies, the prevalence of adverse events may be underestimated.  
15  
16 124 • Our review provides limited evidence on the harms of prolonged medical cannabis use since most  
17 125 studies reported adverse events for less than one year of follow-up.  
18  
19 126 • Some studies reported on smoked or vaporized medical cannabis, which may be associated with  
20 127 different adverse events (e.g. respiratory) than oral or topical formulations. We performed  
21 128 subgroup analyses based on the type of medical cannabis, but our findings were of low credibility  
22 129 due to inconsistency and/or imprecision.  
23  
24  
25  
26  
27  
28  
29  
30  
31  
32  
33  
34  
35  
36  
37  
38  
39  
40  
41  
42  
43  
44  
45  
46  
47  
48  
49  
50  
51  
52  
53  
54  
55  
56  
57  
58  
59  
60

## 131 Background

132 Chronic pain is the primary cause of health care resource use and disability among working adults in North  
133 America and Western Europe.<sup>1 2</sup> The use of cannabis for the management of chronic pain is becoming  
134 increasingly common due to pressure to reduce opioid use, increased availability and changing legislation,  
135 shift in public attitudes and decreased stigma, and aggressive marketing.<sup>3 4</sup> The two most-studied  
136 cannabinoids in medical cannabis are delta-9-tetrahydrocannabinol (THC) and cannabidiol (CBD).<sup>5</sup> THC  
137 binds to cannabinoid receptors type 1 and 2, is an analog to the endogenous cannabinoid, anandamide,  
138 and has shown psychoactive, analgesic, anti-inflammatory, antioxidant, antipruritic, anti-spasmodic, and  
139 muscle-relaxant activities. CBD directly interacts with various ion channels to produce analgesic, anti-  
140 inflammatory, anti-convulsant and anxiolytic activities, without the psychoactive effects of THC.<sup>5</sup> Use of  
141 cannabis for therapeutic purposes, however, remains contentious due to the social and legal context and  
142 its known and suspected harms.<sup>6-9</sup>

143 Though common adverse events caused by medical cannabis, including nausea, vomiting, headache,  
144 drowsiness, and dizziness, have been well documented in randomized controlled trials and reviews of  
145 randomized controlled trials,<sup>10 11</sup> less is known about potentially uncommon but serious adverse events,  
146 particularly events that may occur with longer durations of medical cannabis use, such as dependence,  
147 withdrawal symptoms, and psychosis.<sup>4 12-17</sup> Such adverse events are usually observed in large non-  
148 randomized studies that recruit larger numbers of patients and typically follow them for longer durations  
149 of time. Further, evidence from non-randomized studies may be more generalizable, since randomized  
150 controlled trials often use strict eligibility criteria.

151 The objective of this systematic review and meta-analysis is to summarize the evidence on the risks and,  
152 when evidence on risk is not available, the prevalence of adverse events related to medical cannabis and  
153 cannabinoids from non-randomized studies for a *BMJ Rapid Recommendation* addressing medical  
154 cannabis for chronic pain.<sup>18</sup> This evidence synthesis is part of the *BMJ Rapid Recommendations* project, a  
155 collaborative effort from the *MAGIC Evidence Ecosystem Foundation* ([www.magicevidence.org](http://www.magicevidence.org)) and the  
156 *BMJ*.<sup>19</sup> A guideline panel helped define the study question and selected adverse events for review. The  
157 adverse events of interest include psychiatric and cognitive adverse events, injuries and accidents, and  
158 dependence and withdrawal. It is one of four systematic reviews that together informed a parallel  
159 guideline.<sup>11 18 20 21</sup> A parallel systematic review addressed evidence from randomized trials.<sup>11</sup>

160

## 161 **Methods**

162 We report our systematic review in accordance with the PRISMA Harms Checklist.<sup>22</sup> We registered the  
163 protocol for our review at OSF (<https://osf.io/25bxf>) and followed this protocol unless otherwise reported  
164 in this manuscript.<sup>22</sup>

### 165 ***Guideline panel involvement***

166 A guideline panel helped define the study question and selected the adverse events for review. The panel  
167 included nine content experts (two general internists, two family physicians, a pediatrician, a physiatrist,  
168 a pediatric anesthesiologist, a clinical pharmacologist, and a rheumatologist), nine methodologists (five of  
169 whom are also front-line clinicians), and three people living with chronic pain (one of whom used  
170 cannabinoids for medical purposes).

### 171 ***Patient and public involvement***

172 Three patient partners (two women and one man) were included as part of the guideline panel and  
173 contributed to the selection and prioritization of outcomes, protocol, and interpretation of review  
174 findings, and provided insight on values and preferences. Each of our patient partners was living with  
175 chronic pain and were selected to represent a range of experiences regarding medical cannabis. One had  
176 tried and discontinued medical cannabis due to lack of efficacy. One had found success with use of medical  
177 cannabis (primarily oral CBD). The third had no personal experience with medical cannabis.

### 178 ***Search***

179 A medical librarian searched MEDLINE, EMBASE, PsychInfo, and Cochrane Central Register of Controlled  
180 Trials (CENTRAL) from inception to April 1, 2020, with no restrictions on language, for non-randomized  
181 studies reporting on harms or adverse events of medical cannabis or cannabinoids for chronic pain  
182 (Supplement Appendix 1). We scanned reference lists of relevant reviews to identify any eligible studies  
183 not retrieved by our electronic search and solicited content experts from our panel for unpublished  
184 studies. Search records, and later full-texts of studies, not reported in English were translated by a native  
185 speaker of the language.

### 186 ***Study selection***

187 Reviewers (DZ, MAC, AA, RWMV, GL, KL, JED, MMA, BYH, CJH, PJH), working independently and in  
188 duplicate, reviewed titles and abstracts of search records and subsequently full texts of records found

189 potentially eligible at the title and abstract screening stage. Reviewers resolved disagreements by  
190 discussion or by adjudication by a third reviewer (DZ).

191 We included all non-randomized studies that reported on any patient-important harm or adverse event  
192 associated with the use of any formulation of medical cannabis or cannabinoids in adults or children, living  
193 with chronic pain (pain lasting for  $\geq 3$  months) or a medical condition associated with chronic pain (i.e.,  
194 fibromyalgia, arthritis, multiple sclerosis, neuropathy, inflammatory bowel disease, stroke, or advanced  
195 cancer) or that compared adverse events associated with medical cannabis or cannabinoids with another  
196 pharmacologic or non-pharmacologic intervention. We considered herbal cannabis consumed for medical  
197 reasons as medical cannabis. Based on input from the guideline panel, we excluded studies in which  
198 patients used cannabis for less than 4 weeks because we anticipated that four weeks would be the  
199 minimum amount of time after which we would reasonably expect to observe potential serious or long  
200 term harms associated with medical cannabis.<sup>23</sup> We looked for explicit statements or evidence that  
201 patients were experiencing chronic pain. We excluded studies in which: (1) fewer than 25 patients used  
202 medical cannabis or cannabinoids (to exclude studies that would not appreciably contribute to pooled  
203 estimates and studies that may be too small to reliably estimate the prevalence of adverse events), (2)  
204 patients did not suffer from chronic pain or a condition commonly associated with chronic pain or more  
205 than 20% of patients reported using medical cannabis or cannabinoids for a condition other than chronic  
206 pain (to exclude studies in which patients did not predominantly suffer from chronic pain), (3) patients  
207 were using cannabis for recreational reasons, (4) only surrogate measures of patient-important harms  
208 and adverse effects (e.g., performance on cognitive tests, lab values) were reported, and (5) systematic  
209 reviews and other types of studies that did not provide primary data.

#### 210 ***Data extraction and risk of bias***

211 Reviewers (DZ, MAC, AA, RWMV, GL, KL, JED, MMA, BYH, CJH, PJH), working independently and in  
212 duplicate and using a standardized and pilot-tested data collection form, extracted the following  
213 information from each eligible study: (1) study design, (2) patient characteristics (age, sex,  
214 condition/diagnosis), (3) characteristics of medical cannabis or cannabinoids (name of product, dose, and  
215 duration), and (4) number of patients that experienced adverse events, including all adverse events,  
216 serious adverse events, and withdrawal due to adverse events. Reviewers resolved disagreements by  
217 discussion or by adjudication with a third party (DZ). We classified adverse events as serious based on the  
218 classification used in primary studies. For comparative studies, we collected results from models adjusted

219 for confounders, when reported, and unadjusted models when results for adjusted models were not  
220 reported.

221 When studies reported the number of events rather than the number of patients experiencing adverse  
222 events, we only extracted the number of events if they were infrequent (the number of events accounted  
223 for less than 10% of the total number of study participants). For studies that reported on adverse events  
224 at multiple timepoints, we extracted data for the longest point of follow-up that included, at minimum,  
225 80% of the patients recruited into the study. Reviewers resolved disagreements by discussion or by  
226 adjudication with a third reviewer (DZ).

227 Reviewers (DZ, MAC, AA, RWMV, GL, KL, JED, MMA, BYH, CJH, PJH), working independently and in  
228 duplicate, used the Cochrane-endorsed ROBINS-I tool to rate the risk of bias of studies as low, moderate,  
229 serious, or critical across seven domains: (1) bias due to confounding, (2) selection of patients into the  
230 study, (3) classification of the intervention, (4) bias due to deviations from the intended intervention, (5)  
231 missing data, (6) measurement of outcomes, and (7) selection of reported results.<sup>24</sup> Reviewers resolved  
232 discrepancies by discussion or by adjudication by a third party (DZ). Supplement Appendix 2 presents  
233 additional details on the assessment of risk of bias. Studies were considered to adequately adjust for  
234 confounders if they adjusted, at minimum, for pain intensity, concomitant pain medication, disability  
235 status, alcohol use, and past cannabis use. Studies were rated at low risk of bias overall when all domains  
236 were at low risk of bias; moderate risk of bias if all domains were rated at low or moderate risk of bias; at  
237 serious risk of bias when all domains were rated either at low, moderate, or serious risk of bias; and at  
238 critical risk of bias when one or more domains were rated as critical.

### 239 ***Data synthesis***

240 In this review, we synthesized data on serious adverse events and adverse events that may emerge with  
241 longer duration of medical cannabis use. Identified by a parallel BMJ Rapid Recommendations guideline  
242 panel as important, these patient-important outcomes included psychiatric and cognitive adverse events,  
243 injuries and accidents, and dependence and withdrawal. Data on all other adverse events reported in  
244 primary studies are available in an open-access database (<https://osf.io/ut36z/>).<sup>25</sup> We classified adverse  
245 events as serious based on the classification used in primary studies.

246 Adverse events are reported as binary outcomes. For comparative studies, when possible, we present risk  
247 differences and associated 95% confidence intervals (95% CIs). Since there were only two eligible



1  
2  
3 248 comparative studies, each with different comparators, we did not perform meta-analysis. For single-arm  
4  
5 249 studies, we pooled the proportion of patients experiencing adverse events of interest by first applying a  
6  
7 250 Freeman-Tukey type arcsine square root transformation to stabilize the variance. Without this  
8  
9 251 transformation, very high or very low prevalence estimates can produce confidence intervals that contain  
10  
11 252 values lower than 0% or higher than 100%. All meta-analyses used DerSimonian-Laird random-effects  
12  
13 253 models, which are conservative as they consider both within- and between-study variability.<sup>26-28</sup> We also  
14  
15 254 pooled all effect estimates using fixed-effects models as a sensitivity analysis. We evaluated heterogeneity  
16  
17 255 for all pooled estimates through visual inspection of forest plots and calculation of tau-squared ( $\tau^2$ ),  
18  
19 256 because some statistical tests of heterogeneity ( $I^2$  and Cochrane's Q) can be misleading when sample sizes  
20  
21 257 are large and CIs are therefore narrow.<sup>29</sup> Higher values of  $\tau^2$ ,  $I^2$ , and Cochrane's Q indicate higher statistical  
22  
23 258 heterogeneity. For studies that reported estimates for all-cause adverse events and those deemed to be  
24  
25 259 potentially related to cannabis use, we preferentially synthesized results for all adverse events.

26  
27 260 For analyses for which we observed high clinical heterogeneity (i.e., substantial differences in the  
28  
29 261 estimates of individual studies and minimal overlap in the confidence intervals), we presented results  
30  
31 262 narratively.

32  
33 263 In consultation with the parallel BMJ Rapid Recommendations guideline panel, we also prespecified six  
34  
35 264 subgroup hypotheses to explain heterogeneity between studies: (1) study design (longitudinal vs. cross-  
36  
37 265 sectional), (2) type of medical cannabis, (3) cancer vs. non-cancer pain, (4) children vs. adults, (5) duration  
38  
39 266 of medical cannabis use (shorter or longer than the median duration of follow-up across studies), and (6)  
40  
41 267 risk of bias (low/moderate vs. serious/critical). We also performed two post-hoc subgroup analyses: (1)  
42  
43 268 duration of follow-up (shorter or longer than the median duration of follow-up across studies) and (2)  
44  
45 269 selection bias (studies at moderate, serious, or critical risk of selection bias vs. studies at low risk of  
46  
47 270 selection bias). We anticipated that studies reporting on shorter use of medical cannabis, as well as cross-  
48  
49 271 sectional studies, studies on cancer patients, studies including adults, studies with active comparators,  
50  
51 272 studies at high risk of bias would report fewer adverse events. We anticipated that studies at moderate,  
52  
53 273 serious, or critical risk of selection bias that included prevalent cannabis users (i.e., people who were using  
54  
55 274 medical cannabis before the inception of the study) or were preceded by a run-in period or clinical trial  
56  
57 275 during which patients that experienced adverse events or found medical cannabis intolerable could  
58  
59 276 discontinue would report fewer adverse events because prevalent of medical cannabis are likely to  
60  
277 represent populations that have self-selected for tolerance to cannabis. We performed tests for

278 interaction to establish whether subgroups differed significantly from one another. We assessed the  
279 credibility of significant subgroup effects (test for interaction  $p < .05$ ) using published criteria.<sup>30 31</sup>

280 We performed all analyses using the 'meta' package in R (version 3.5.1, R Foundation for Statistical  
281 Computing).<sup>32</sup>

### 282 ***Certainty of evidence***

283 We used the GRADE approach to rate the certainty of evidence.<sup>33 34</sup> Based on GRADE guidance for using  
284 the ROBINS-I tool, evidence starts at high certainty and is downgraded by one level when the majority of  
285 the evidence comes from studies at moderate risk of bias, two levels when the majority of the evidence  
286 comes from studies at high risk of bias, and three levels when the majority of the evidence comes from  
287 studies rated at critical risk of bias.<sup>33</sup> We additionally considered potential limitations due to indirectness  
288 if the population, intervention, or adverse events assessed in studies did not reflect the populations,  
289 interventions, or adverse events of interest, inconsistency if there was important unexplained differences  
290 in the results of studies, and imprecision if the upper and lower bounds of confidence intervals indicated  
291 appreciably different rates of adverse events. For assessing inconsistency and imprecision for the outcome  
292 all adverse events, based on feedback from the guideline panel, we deemed a 20% difference in the  
293 prevalence of all adverse evidence to be patient-important; a 10% difference for adverse events leading  
294 to discontinuation, serious adverse events, and psychiatric, cognitive, withdrawal and dependence,  
295 injuries; and a 3% difference for potentially fatal adverse events, such as suicides and motor vehicle  
296 accidents. We followed GRADE guidance for communicating our findings.<sup>35</sup> Guideline panel members  
297 interpreted the magnitude of adverse events and decided whether the observed prevalence of adverse  
298 events was sufficient to affect patients' decisions to use medical cannabis or cannabinoids for chronic pain.

## 299 **Results**

### 300 ***Study selection***

301 Our search yielded 17,178 unique records of which 434 were reviewed in full. We excluded more than  
302 half of references because they did not describe a non-randomized study, a quarter because they did not  
303 include patients with chronic pain, and a small minority because they did not report on adverse events.  
304 Of these records, 39 non-randomized studies were eligible for review (Supplement Appendix 3).<sup>36-74</sup> Figure  
305 1 presents additional details related to study selection. Supplement Appendix 4 presents studies excluded  
306 at the full-text screening stage and accompanying reasons for exclusion.

### 307 **Description of studies**

308 One study was published in German and the remainder in English. Studies included 12,143 adults living  
309 with chronic pain and included a median of 100 (IQR 34 to 361) participants (Table 1). Most studies (30/39;  
310 76.9%) were longitudinal in design. Eighteen studies (46.2%) were conducted in Western Europe, fourteen  
311 (35.9%) in North America, six (15.4%) in Israel, and two (5.1%) in the United Kingdom. Ten studies (25.6%)  
312 were funded by industry alone or industry in combination with government and institutional funds; the  
313 remainder were funded either by governments, institutions, or not-for-profit organizations (n=9; 23.1%),  
314 did not receive funds (n=3; 7.7%), or did not report funding information (n=17; 43.6%).

315 Thirty studies (76.9%) reported on people living with chronic non-cancer pain, eight (n=20.5%) with mixed  
316 cancer and non-cancer chronic pain, and one (2.6%) with chronic cancer pain. All studies reported on  
317 adults. Sixteen studies reported on mixed types of herbal cannabis (e.g., buds for smoking, vaporizing, and  
318 ingesting, hashish, oils, extracts, edibles), nine on palmitoylethanolamide (PEA), four each on nabiximols  
319 and dronabinol, two on nabilone, one each on Trokie lozenges and extracts, and four did not report the  
320 type of medical cannabis used. Herbal cannabis, lozenges, extracts, and nabiximols are mixed CBD and  
321 THC products whereas nabilone and dronabinol only contain THC. One study reported on three types of  
322 medical cannabis (dronabinol, nabiximols, and mixed herbal) separately. The median duration of medical  
323 cannabis use was 24 weeks (IQR 12.0 to 33.8 weeks). Two studies were comparative: one study compared  
324 nabilone with gabapentin and another compared herbal cannabis with standard care.<sup>40,49</sup> Studies reported  
325 a total of 525 unique adverse events.

### 326 **Risk of bias**

327 Supplement Appendix 5 presents the risk of bias of included studies. We rated all results at critical risk of  
328 bias except for the comparative results from two studies,<sup>40,49</sup> which were rated at serious and moderate  
329 risk of bias. The primary limitation across studies was inadequate control for potential confounding either  
330 due to the absence of a control group or inadequate adjustment for confounders. A third of studies were  
331 rated at serious risk of bias for selection bias, primarily because they included prevalent users of medical  
332 cannabis. Such studies may underestimate the incidence of adverse events since patients that experience  
333 adverse events are more likely to discontinue medical cannabis early. Such studies may also include  
334 adverse events that may have been present at inception and that are unrelated to medical cannabis use.

1  
2  
3 335 **All adverse events**  
4

5 336 Twenty longitudinal and two cross-sectional studies, including 4,108 patients, reported the number of  
6 337 patients experiencing one or more adverse events.<sup>37-44 47 48 55 57-61 63 65 66 70 71 74</sup> Seven studies reported on  
8 338 PEA, five on mixed herbal cannabis, three each on nabilone and nabiximols, two on dronabinol, and one  
9 339 each on extracts and Trokie lozenges. The median duration of medical cannabis use was 24 weeks [IQR 12  
10 340 to 32]. We observed substantial unexplained heterogeneity and so summarize the results descriptively  
11 341 (Table 2; Supplement Appendices 6 to 9). The prevalence of any adverse event ranged between 0% to  
12 342 92.1%. Studies with less than 24 weeks of cannabis use (the median duration of cannabis) typically  
13 343 reported fewer adverse events than those with more than 24 weeks. Patients using PEA experienced no  
14 344 adverse events. The evidence was overall very uncertain due to risk of bias and inconsistency.

15 345 One study suggested that nabilone may reduce the risk of adverse events compared to gabapentin (-  
16 346 13.1%; 95% CI -26.2 to 0), but the certainty of evidence was very low due to risk of bias and imprecision  
17 347 (Table 3).

18  
19  
20  
21  
22  
23 348 **Adverse events leading to discontinuation**  
24  
25  
26  
27

28 349 Twenty longitudinal studies, including 6,509 patients, reported on the number of patients that  
29 350 discontinued medical cannabis or cannabinoids due to adverse events.<sup>38 40 42-45 47-50 53 55 57 58 60 63 64 66 71 74</sup>  
30 351 Eight studies reported on PEA, four studies on mixed herbal cannabis, three on nabiximols, two on  
31 352 nabilone, and one each on dronabinol and extracts, and one study did not report the type of medical  
32 353 cannabis used by patients. The median duration of cannabis use was 24 weeks [IQR 8.6 to 32]. We  
33 354 observed substantial unexplained heterogeneity and so summarize the results descriptively (Supplement  
34 355 Appendices 10 to 12). The prevalence of discontinuations due to adverse events ranged between 0% to  
35 356 27.0%. Studies with less than 24 weeks of cannabis use typically reported fewer discontinuations than  
36 357 those with more than 24 weeks. Patients using PEA experienced no adverse events. The evidence was  
37 358 overall very uncertain due to risk of bias and inconsistency.

38  
39  
40  
41 359 One study suggested herbal cannabis may increase the risk of adverse events leading to discontinuation  
42 360 compared to standard care without cannabis (4.7%; 95% CI 1.8 to 7.5). Another study suggested that  
43 361 nabilone may reduce the risk of adverse events leading to discontinuation compared to gabapentin (-  
44 362 9.4%; 95% CI -18.5 to -0.2). The certainty of evidence was low to very low due to risk of bias and  
45 363 imprecision.

### 364 ***Serious adverse events***

365 Twenty-two longitudinal and two cross-sectional studies, including 4,273 patients, reported on the  
366 number of patients experiencing one or more serious adverse events.<sup>36-38 40-44 47 49 50 53 55-61 63 66 71 72 74</sup> Eight  
367 studies reported on mixed herbal cannabis, eight on PEA, two each on nabilone and nabiximols each, and  
368 one study each on dronabinol, extracts, and Trokie lozenges, and one study did not report the type of  
369 cannabis used. The median duration of medical cannabis or cannabinoid use was 24 weeks (IQR 12 to 32),  
370 and few patients experienced serious adverse events (1.2%; 95% CI 0.1 to 3.1;  $I^2=91%$ ) (Figure 2)  
371 (Supplement Appendices 13 to 15). There was a statistically significant subgroup effect across different  
372 types of medical cannabis though serious adverse events appeared consistently uncommon (low  
373 credibility). The certainty of evidence was very low overall due to serious risk of bias.

374 One study suggested use of herbal cannabis may make little to no difference in the risk of serious adverse  
375 events compared to standard care without cannabis (1.5%; 95% CI -8.3 to 20.2). Another study found use  
376 of nabilone vs. gabapentin may make little to no difference in the risk of serious adverse events. The  
377 certainty of evidence was low to very low for both studies due to risk of bias and imprecision.

### 378 ***Psychiatric adverse events***

379 Eleven longitudinal and two cross-sectional studies, including 6,600 patients, reported on any psychiatric  
380 adverse events, including psychiatric disorders, suicide, suicidal thoughts, depression, mania,  
381 hallucinations, delusions, paranoia, anxiety, and euphoria (Supplement Appendices 16 to 25).<sup>36-38 44 48 49 61</sup>  
382<sup>64 68 69 71</sup> Five studies reported on mixed herbal cannabis, four on nabiximols, one each on dronabinol,  
383 nabilone, and mixed types and one study did not specify the type of medical cannabis. The median  
384 duration of cannabis use across studies was 52 weeks (IQR 20 to 52). Approximately one in seven medical  
385 cannabis users experienced one or more psychiatric disorders or adverse events (13.5%; 95% CI 2.6 to  
386 30.6;  $I^2=98%$ ). The most frequently occurring psychiatric adverse events were paranoia (5.6%; 9% CI 0 to  
387 19.2;  $I^2=85%$ ) and anxiety (7.4%; 95% CI 0 to 26.9;  $I^2=99%$ ). The certainty of evidence was very low due to  
388 risk of bias, inconsistency (for psychiatric disorders and paranoia), and imprecision (for psychiatric  
389 disorder, paranoia, and anxiety).

390 One study suggested that herbal cannabis may result in a trivial to moderate increase in the risk for  
391 psychiatric disorders, mania, hallucinations, depression, paranoia, anxiety, and euphoria and a reduction  
392 in the risk for suicides and delusions, compared with standard care without cannabis, though the certainty  
393 of evidence was low to very low due to risk of bias and imprecision.

### 394 ***Cognitive and attentional adverse events***

395 Eleven longitudinal studies, including 6,257 patients, reported on cognitive adverse events, including  
396 memory impairment, confusion, disorientation, and impaired attention (Supplement Appendices 26 to  
397 29).<sup>36-38 44 48 49 61 64 68 69 71</sup> Five studies reported on herbal cannabis, three on nabiximols, three on mixed  
398 types of cannabis, and one each on dronabinol and nabilone. The median duration of cannabis use was  
399 52 weeks (IQR 24 to 52). The prevalence of cognitive adverse events ranged from 1.6% (95% CI 0.6 to 3.0;  
400  $I^2=88%$ ) for disorientation to 5.3% (95% CI 2.1 to 9.6;  $I^2=96%$ ) for memory impairment. The certainty of  
401 evidence was very low due to risk of bias.

402 One study suggested herbal cannabis may slightly increase the risk for memory impairment and  
403 disturbances in attention compared to standard care without cannabis, but reduce the risk for confusion,  
404 though the certainty of evidence was low to very low due to risk of bias and imprecision.

### 405 ***Accidents and injuries***

406 One longitudinal study, including 431 patients, reported on accidents and injuries in patients using mixed  
407 herbal cannabis for 52 weeks (Supplement Appendices 30 & 31).<sup>49</sup> This study suggested herbal cannabis  
408 used for medical purposes may slightly increase the risk of motor vehicle accidents (0.5%; 95% CI -0.4 to  
409 1.4) but may not increase the risk of falls (0%; 95% CI -2.8 to 2.9). The certainty of evidence was low due  
410 to risk of bias.

### 411 ***Dependence and withdrawal***

412 Four longitudinal and one cross-sectional study, including 2,248 patients, reported on dependence-  
413 related adverse events, including dependence (one study reported on 'abuse' based on unspecified  
414 criteria, one study reported on 'problematic use' using the Alcohol Use Disorder and Associated  
415 Disabilities Interview Schedule–Diagnostic and Statistical Manual of Mental Disorders–Fourth Edition  
416 [AUDADIS-IV]<sup>75</sup>, and one study reported on 'dependence' using the Alcohol, Smoking, and Substance  
417 Involvement Screening Test<sup>76</sup>), withdrawal symptoms (defined as one or moderate or severe withdrawal  
418 symptoms including sleep difficulties, anxiety, irritability, and appetite disturbance), and withdrawal  
419 syndrome (two studies that used unspecified criteria) (Supplement Appendices 32 to 34).<sup>49 54 57 68 71</sup> Two  
420 studies reported on herbal cannabis, one each on nabiximols and nabilone, and one did not specify type  
421 of medical cannabis used by patients. Follow-up ranged from 12 to 52 weeks. The pooled prevalence of  
422 dependence was 4.4% (95% CI 0.0 to 19.9;  $I^2=99%$ ) and 2.1% (95% CI 0 to 8.2;  $I^2=89%$ ) for withdrawal

1  
2  
3 423 syndrome; however, withdrawal symptoms were much more common (67.8%; 95% CI 64.1 to 71.4). The  
4 424 certainty of evidence was very low due to risk of bias, inconsistency, imprecision (for dependence), and  
5 425 indirectness due to vagueness of definitions in studies that precluded confident distinction between  
6 426 dependence, addiction, withdrawal symptoms, and withdrawal syndrome.

7  
8  
9  
10  
11 427 One study suggested that herbal cannabis compared to standard care may slightly increase the risk of  
12 428 withdrawal syndrome (0.5%; 95% CI -0.4 to 1.4) but the certainty of evidence was low due to risk of bias.

## 15 429 **Discussion**

### 17 430 ***Main findings***

19 431 Our systematic review and meta-analysis suggests that adverse events are common among people living  
20 432 with chronic pain who use medical cannabis or cannabinoids, with approximately one in four experiencing  
21 433 at least one adverse event—though the certainty of evidence is very low and the true prevalence of  
22 434 adverse events may be substantially different. In contrast, serious adverse events, adverse events leading  
23 435 to discontinuation, cognitive adverse events, accidents and injuries, and dependence and withdrawal  
24 436 syndrome are less common. We compared studies with <24 weeks and ≥ 24 weeks cannabis use and found  
25 437 more adverse events reported among studies with longer follow-up. This may be explained by increased  
26 438 tolerance (tachyphylaxis) with prolonged exposure, necessitating increases in dosage with consequent  
27 439 increased risk of harms. PEA, compared to other formulations of medical cannabis, may result in the  
28 440 fewest adverse events. Though adverse events associated with medical cannabis appear to be common,  
29 441 few patients discontinued use due to adverse events suggesting that most adverse events are transient  
30 442 and/or outweighed by perceived benefits.

31  
32  
33  
34  
35  
36  
37  
38  
39  
40  
41 443 Our review represents the most comprehensive review of evidence from non-randomized studies  
42 444 addressing adverse events of medical cannabis or cannabinoid use in people living with chronic pain.  
43 445 While several previous reviews have summarized the evidence on short-term and common adverse events  
44 446 of medical cannabis reported in randomized trials, such as oral discomfort, dizziness, and headaches, our  
45 447 review focuses on serious and rare adverse events—the choice of which was informed by a panel including  
46 448 patients, clinicians, and methodologists—and non-randomized studies, which typically follow larger  
47 449 numbers of patients for longer periods of time and thus may detect adverse events that are infrequent or  
48 450 that are associated with longer durations of cannabis use.<sup>10 77-81</sup> A parallel systematic review of evidence  
49 451 from randomized controlled trials found no evidence to inform long-term harms of medical cannabis as  
50 452 no eligible trial followed patients for more than 5.5 months.<sup>11</sup> One previously published review that

1  
2  
3 453 included non-randomized studies searched the literature until 2007, included studies exploring medical  
4 454 cannabis for any indication (excluding synthetic cannabinoids) of which only two enrolled people living  
5 455 with chronic pain.<sup>12</sup> This review did not synthesize adverse event data from non-randomized studies.<sup>12</sup>  
6  
7 456 Unlike previous reviews, we focused exclusively on medical cannabis for chronic pain and excluded  
8 457 recreational cannabis, because cannabis used for recreational purposes often contains higher  
9 458 concentrations of THC than medical cannabis. We focused on chronic pain because this patient population  
10 459 may be susceptible to different adverse events. Depression and anxiety, for example, are commonly  
11 460 occurring comorbidities of chronic pain, which may be exacerbated by cannabis.<sup>15-17</sup>

### 17 461 ***Strengths and limitations***

19 462 Strengths of this systematic review and meta-analysis include a comprehensive search for non-  
20 463 randomized studies, explicit eligibility criteria, screening of studies and collection of data in duplicate to  
21 464 increase reliability, and use of the GRADE approach to evaluate the certainty of evidence.

23 465 Our review is limited by the non-comparative design of most studies, which precludes confident  
24 466 inferences regarding the proportion of adverse events that can be attributed to medical cannabis or  
25 467 cannabinoids and the magnitude by which medical cannabis may increase or decrease the risk of adverse  
26 468 events compared to other pain management options. Though adverse events appear common among  
27 469 medical cannabis users, it is possible that other management options for chronic pain, particularly opioids,  
28 470 may be associated with more (and more severe) adverse events.<sup>82</sup> Partly due to the non-comparative  
29 471 design of most studies, nearly all results included in our review were at serious or critical risk of bias for  
30 472 confounding and Simpson's paradox,<sup>83</sup> either due to the absence of a control group or due to insufficient  
31 473 adjustment for important confounders. Further, a third of studies were at high risk of selection bias,  
32 474 primarily because they included prevalent cannabis users. In such studies, the prevalence of adverse  
33 475 events may be underestimated. Our review provides limited evidence on the harms of medical cannabis  
34 476 beyond one year of use since most studies reported adverse events for less than one year of follow-up.

36 477 We observed some inconsistency for many adverse events of interest and substantial inconsistency for all  
37 478 adverse events and adverse events leading to discontinuation. We downgraded the certainty of evidence  
38 479 when we observed important inconsistency and we did not present estimates from meta-analyses for all  
39 480 adverse events and adverse events leading to discontinuation due to substantial inconsistency. Further,  
40 481 some analyses included too few studies or participants, due to which estimates were imprecise.



1  
2  
3 482 Sixteen of 39 studies reported on herbal medical cannabis, some of which were consumed by smoking or  
4 483 vaporizing, and may be associated with different adverse events (e.g. respiratory) than other formulations  
5 484 of medical cannabis. We attempted to perform subgroup analyses based on the type of medical cannabis.  
6 485 Results for subgroups, however, lacked credibility due to inconsistency and/or imprecision.  
7  
8  
9

10  
11 486 Clinicians and patients may be more inclined to use medical cannabis or cannabinoids for pain relief if  
12 487 adverse events are mild; however, the evidence on whether adverse events are transient, life threatening,  
13 488 or the extent to which they impact quality of life is limited. While more than half of studies reported on  
14 489 the proportion of adverse events that were serious, criteria for ascertaining severity were rarely reported.  
15  
16 490 None of the included studies reported the duration for which patients experienced adverse events.  
17 491 Further, most primary studies did not report adequate details on methods for the ascertainment of  
18 492 adverse events, including definitions or diagnostic criteria. The two studies that reported on withdrawal  
19 493 syndrome, for example, did not provide diagnostic criteria.<sup>49 57</sup> However, the DSM-5 requires  $\geq 3$  of 7  
20 494 withdrawal symptoms to be present within a week of stopping cannabis use to meet a diagnosis of  
21 495 cannabis withdrawal syndrome.<sup>84</sup> It is therefore reasonable that people living with chronic pain that use  
22 496 medical cannabis would be more likely to experience withdrawal symptoms vs. withdrawal syndrome.  
23  
24  
25  
26  
27  
28  
29

30 497 While children and youth account for approximately 15% of all chronic pain patients, we did not identify  
31 498 any evidence addressing the harms of medical cannabis in this population.<sup>85</sup> As such, the extent to which  
32 499 our findings are generalizable to pediatric populations is uncertain. Although there is evidence that  
33 500 cannabis use during youth is associated with increased risk of acute psychotic disorders, particularly acute  
34 501 psychosis,<sup>86</sup> such studies have focussed on use of recreational cannabis that contains greater amounts of  
35 502 THC than is typically seen in medical preparations. Further, the population of patients with chronic pain  
36 503 included in the studies we reviewed may not be representative of all patients with chronic pain—  
37 504 particularly rare conditions that cause chronic pain.  
38  
39  
40  
41  
42  
43  
44

45 505 We used the DerSimonian and Laird method for meta-analysis.<sup>27</sup> A growing body of evidence, however,  
46 506 suggests that this model has important limitations that may be addressed by alternative models<sup>87</sup>—  
47 507 though there is limited evidence on the performance of these models for meta-analyses of proportions  
48 508 and prevalence.  
49  
50  
51

52 509 Finally, we excluded studies from meta-analyses when they did not explicitly report the adverse events of  
53 510 interest to our panel members. This may have overestimated the prevalence of adverse events if the  
54 511 adverse events of interest were not observed in the studies in which they were not reported. This was,  
55  
56  
57  
58  
59  
60

1  
2  
3 512 however, not possible to confirm because methods for the collection and reporting of adverse event data  
4 513 across studies were variable (e.g., active monitoring vs. passive surveillance; collecting data on specific  
5 514 adverse events vs. all adverse events) and poorly described in study reports.  
6  
7

### 8 9 515 **Implications**

10  
11 516 Our systematic review and meta-analysis shows that evidence regarding long-term and serious harms of  
12 517 medical cannabis or cannabinoids is insufficient—an issue with important implications for patients and  
13 518 clinicians considering this management option for chronic pain. While the evidence suggests that adverse  
14 519 events are common in patients using medical cannabis for chronic pain, serious adverse events appear  
15 520 less common, which suggests that the potential benefits of medical cannabis or cannabinoids (although  
16 521 modest) may outweigh potential harms for some patients.<sup>11 18</sup>  
17  
18  
19  
20  
21

22 522 Clinicians and patients considering medical cannabis should be aware that more adverse events were  
23 523 reported among studies with longer follow-up, necessitating long term follow-up of patients and re-  
24 524 evaluation of pain treatment options. Our findings also have implications for the choice of medical  
25 525 cannabis. We found PEA, for example, to consistently be associated with few or no adverse events across  
26 526 studies, though the evidence on the efficacy of PEA is limited.<sup>11</sup>  
27  
28  
29  
30  
31

32 527 We found very limited evidence comparing medical cannabis or cannabinoids with other pain  
33 528 management options. Other pharmacological treatments for chronic pain, such as gabapentinoids,  
34 529 antidepressants, and opioids, may be associated with more (and more serious) adverse events.<sup>88-90</sup> To  
35 530 guide patients' and clinicians' decisions on medical cannabis for chronic pain, future research should  
36 531 compare the harms of medical cannabis and cannabinoids with other pain management options, including  
37 532 opioids, ideally beyond one year of use, and adjust results for confounders.  
38  
39  
40  
41  
42

43 533 Our review highlights the need for standardization of reporting of adverse events in non-randomized  
44 534 studies since such studies represent a critical source of data on long-term and infrequently occurring  
45 535 harms. To enhance the interpretability of adverse event data, future studies should also report the  
46 536 duration and severity of adverse events and whether adverse events are life-threatening, since these  
47 537 factors are critical to patients' decisions.  
48  
49  
50  
51

52 538 A valuable output of our systematic review is an open-source database of over 500 unique adverse events  
53 539 reported to date in non-randomized studies of medical cannabis or cannabinoids for chronic pain with  
54 540 corresponding assessments of risk of bias (<https://osf.io/ut36z/>). This database was compiled in duplicate  
55  
56  
57  
58  
59  
60

1  
2  
3 541 by trained and calibrated data extractors and is freely available to those interested in further analyzing  
4  
5 542 the prevalence of different types of adverse events or to those interested in expanding the database to  
6  
7 543 include adverse events in patients using medical cannabis or cannabinoids for other indications.  
8

9 544 **Conclusion**

10  
11 545 Our systematic review and meta-analysis found very low certainty evidence that suggests adverse events  
12  
13 546 are common among people living with chronic pain using medical cannabis or cannabinoids, but that  
14  
15 547 serious adverse events, adverse events causing discontinuation, cognitive adverse events, motor vehicle  
16  
17 548 accidents, falls, and dependence and withdrawal syndrome are less common. We also found very low  
18  
19 549 certainty evidence that longer duration of use was associated more adverse events and that PEA,  
20  
21 550 compared with other types of medical cannabis, may result in few or no adverse events. Future research  
22  
23 551 should compare the risks of adverse events of medical cannabis and cannabinoids with alternative pain  
24  
25  
26  
27  
28  
29  
30  
31  
32  
33  
34  
35  
36  
37  
38  
39  
40  
41  
42  
43  
44  
45  
46  
47  
48  
49  
50  
51  
52  
53  
54  
55  
56  
57  
58  
59  
60

1  
2  
3  
4  
5  
6  
7  
8  
9  
10  
11  
12  
13  
14  
15  
16  
17  
18  
19  
20  
21  
22  
23  
24  
25  
26  
27  
28  
29  
30  
31  
32  
33  
34  
35  
36  
37  
38  
39  
40  
41  
42  
43  
44  
45  
46  
47  
48  
49  
50  
51  
52  
53  
54  
55  
56  
57  
58  
59  
60

553 **Figure Legends**

554

555 **Figure 1: Study selection process**

556

557 **Figure 2: Forest plot of the meta-analysis for serious adverse events stratified by type of medical**  
558 **cannabis**

For peer review only

Table 1: Study characteristics

| Study                            | Design           | Country                                            | Condition                                                                            | Cannabis/<br>comparator     | Dose                                                                                                                                                                     | # of<br>participants | Duration of cannabis<br>use (weeks)                       |
|----------------------------------|------------------|----------------------------------------------------|--------------------------------------------------------------------------------------|-----------------------------|--------------------------------------------------------------------------------------------------------------------------------------------------------------------------|----------------------|-----------------------------------------------------------|
| Ware, 2003 <sup>35</sup>         | cross-sectional* | Canada                                             | mixed non-cancer pain                                                                | mixed herbal<br>(CBD + THC) | frequency: rarely (n=9), weekly (n=8), daily<br>(n=5), >once daily (n=7)<br><br>dose: 1-2 puffs (n=4), 3-4 puffs (n=13), whole<br>joint (n=8), more than one joint (n=4) | 32                   | NR                                                        |
| Lynch, 2006 <sup>36</sup>        | longitudinal*    | Canada                                             | mixed non-cancer pain                                                                | mixed herbal<br>(CBD + THC) | mean: 2.5 g/day                                                                                                                                                          | 30                   | mean: 94.4                                                |
| Rog, 2007 <sup>37</sup>          | longitudinal*    | UK                                                 | multiple sclerosis                                                                   | nabiximols<br>(CBD + THC)   | mean: 7.5 sprays/day                                                                                                                                                     | 63                   | 66.1                                                      |
| Weber, 2009 <sup>38</sup>        | longitudinal*†   | Germany                                            | mixed non-cancer pain                                                                | dronabinol<br>(THC)         | median: 7.5 mg/day                                                                                                                                                       | 172                  | mean: 31                                                  |
| Bestard, 2011 <sup>39</sup>      | longitudinal*    | Canada                                             | peripheral neuropathic pain                                                          | nabilone<br>(THC)           | mean: 3.0 mg/day                                                                                                                                                         | 104                  | 24                                                        |
|                                  |                  |                                                    |                                                                                      | gabapentin                  | mean: 2.3 g/day                                                                                                                                                          | 107                  |                                                           |
| Fiz, 2011 <sup>40</sup>          | cross-sectional* | Spain                                              | fibromyalgia                                                                         | mixed herbal<br>(CBD + THC) | ~1 to 2 cigarettes or spoonful<br><br>daily (n=12) once every 2 to 4 days (n=5), less<br>than twice a week (n=3), or occasionally (n=8)                                  | 28                   | <52 (n=11), 52 to 156<br>(n=9), >156 weeks (n=8)          |
| Dominguez, 2012 <sup>41</sup>    | longitudinal*    | Spain                                              | lumbosciatica                                                                        | PEA                         | 300 mg bid                                                                                                                                                               | 64                   | 4                                                         |
| Gatti, 2012 <sup>42</sup>        | longitudinal††   | Italy                                              | mixed cancer and non-cancer<br>pain                                                  | PEA                         | 600 mg bid 3 weeks; 600 mg/day for 4 weeks                                                                                                                               | 564                  | 7                                                         |
| Toth, 2012 <sup>43</sup>         | longitudinal*†   | Canada                                             | diabetic peripheral neuropathy                                                       | nabilone<br>(THC)           | mean: 2.85 mg/day                                                                                                                                                        | 37                   | 4                                                         |
| Schifilliti, 2014 <sup>44</sup>  | longitudinal††   | Italy                                              | diabetic neuropathy                                                                  | PEA                         | 300 mg bid                                                                                                                                                               | 30                   | 8.6                                                       |
| Storr, 2014 <sup>45</sup>        | cross-sectional* | Canada                                             | Crohn's disease (n=42), ulcerative<br>colitis (n=10), indeterminate<br>colitis (n=4) | mixed herbal<br>(CBD + THC) | NR                                                                                                                                                                       | 56                   | <4 (n=3), 4 to 24 (n=9),<br>24 to 52 (n=5), >52<br>(n=32) |
| Del Giorno, 2015 <sup>46</sup>   | longitudinal††   | Italy                                              | fibromyalgia                                                                         | PEA                         | 600 mg bid first month; 300 mg bid in the next<br>2 months                                                                                                               | 35                   | 12                                                        |
| Hoggart, 2015 <sup>47</sup>      | longitudinal††   | UK, Czech Republic,<br>Romania, Belgium,<br>Canada | diabetic neuropathy                                                                  | nabiximols<br>(CBD + THC)   | median: 6 to 8 sprays/day                                                                                                                                                | 380                  | median: 35.6                                              |
| Ware, 2015 <sup>48</sup>         | longitudinal*†   | Canada                                             | mixed non-cancer pain                                                                | mixed herbal<br>(CBD + THC) | median: 2.5 g/day                                                                                                                                                        | 215                  | 52                                                        |
|                                  |                  |                                                    |                                                                                      | standard care               |                                                                                                                                                                          | 216                  |                                                           |
| Haroutounian, 2016 <sup>49</sup> | longitudinal*    | Israel                                             | mixed cancer and non-cancer<br>pain                                                  | mixed herbal<br>(CBD + THC) | mean: 43.2 g/month                                                                                                                                                       | 206                  | 30                                                        |
|                                  | longitudinal*    |                                                    |                                                                                      |                             | Capsule: 10 mg /8 to 10 hours                                                                                                                                            |                      |                                                           |
| Bellnier, 2017 <sup>50</sup>     |                  | US                                                 | mixed cancer and non-cancer<br>pain                                                  | mixed herbal<br>(CBD + THC) | Inhaler for breakthrough pain: 2 mg THC, 0.1<br>mg CBD; 1 to 5 puffs every 15 minutes until<br>pain relief; could be used every 4 to 6 hours                             | 29                   | 12                                                        |
| Cranford, 2017 <sup>51</sup>     | cross-sectional* | US                                                 | mixed non-cancer pain                                                                | NR                          | 0 (n=69), <1/8 oz/week (n=130), 1/8 to 1/4<br>oz/week (n=156), 1/4 to 1/2 oz/week (n=179),<br>1/2 to 1 oz/week (n=122), 1 or more oz/week<br>(n=115)                     | 775                  | NR                                                        |

|    | Author, Year                         | Study Design      | Country          | Condition                                   | Intervention                | Outcome                                                                                                                                     | n    | Effect Size          |
|----|--------------------------------------|-------------------|------------------|---------------------------------------------|-----------------------------|---------------------------------------------------------------------------------------------------------------------------------------------|------|----------------------|
|    | Fanelli, 2017 <sup>52</sup>          | longitudinal††    | Italy            | mixed cancer and non-cancer pain            | mixed herbal (CBD + THC)    | mean: 69.5 mg/day bediol; 67.0 mg/day bedrocan                                                                                              | 341  | mean: 14.01          |
| 1  | Feingold, 2017 <sup>53</sup>         | cross-sectional*  | Israel           | mixed cancer and non-cancer pain            | Mixed herbal (CBD + THC)    | NR                                                                                                                                          | 406  | NR                   |
| 2  | Paladini, 2017 <sup>54</sup>         | longitudinal††    | Italy            | failed back surgery syndrome                | PEA                         | 600 mg bid for one month; 600 mg/day for one month                                                                                          | 35   | 8                    |
| 3  | Passavanti, 2017 <sup>55</sup>       | longitudinal††    | Italy            | lower back pain                             | PEA                         | 600 mg bid                                                                                                                                  | 30   | 24                   |
| 4  | Schimrigk, 2017 <sup>56</sup>        | longitudinal*†    | Germany, Austria | multiple sclerosis                          | dronabinol (THC)            | range: 7.5 to 15 mg/day                                                                                                                     | 209  | 32                   |
| 5  | Chirchiglia, 2018 <sup>57</sup>      | longitudinal††    | Italy            | lower back pain                             | PEA                         | 1.2 g/day                                                                                                                                   | 100  | 4                    |
| 6  | Crowley, 2018 <sup>58</sup>          | longitudinal*     | US               | mixed non-cancer pain                       | Trokie lozenges (CBD + THC) | NR                                                                                                                                          | 35   | 4 to 60              |
| 7  | Habib, 2018 <sup>59</sup>            | longitudinal*     | Israel           | fibromyalgia                                | mixed herbal (CBD + THC)    | mean: 26 g/month                                                                                                                            | 26   | mean: 41.6           |
| 8  | Anderson, 2019 <sup>60</sup>         | longitudinal*     | US               | cancer pain                                 | mixed herbal (CBD + THC)    | NR                                                                                                                                          | 1120 | 16                   |
| 9  | Bonar, 2019 <sup>61</sup>            | cross-sectional†† | US               | mixed non-cancer pain                       | NR                          | 0 (n=95), <1/8 oz/week (n=126), 1/8 to 1/4 oz/week (n=158), 1/4 to 1/2 oz/week (n=174), 1/2 to 1 oz/week (n=119), 1 or more oz/week (n=119) | 790  | NR                   |
| 10 | Cervigni, 2019 <sup>62</sup>         | longitudinal†     | Italy            | interstitial cystitis/bladder pain syndrome | PEA                         | 400 mg m-PEA plus 40 mg polydatin bid for 3 months, od for 3 months                                                                         | 32   | 24                   |
| 11 | Cremer-Schaeffer, 2019 <sup>63</sup> | longitudinal††    | Germany          | mixed cancer and non-cancer pain            | dronabinol (THC)            | NR                                                                                                                                          | 2017 | 52                   |
| 12 |                                      |                   |                  |                                             | mixed herbal                | NR                                                                                                                                          | 656  |                      |
| 13 |                                      |                   |                  |                                             | nabiximols                  | NR                                                                                                                                          | 393  |                      |
| 14 | Lejczak, 2019 <sup>64</sup>          | longitudinal†     | France           | mixed cancer and non-cancer pain            | dronabinol (THC)            | range: 2.5 to 30 mg/day                                                                                                                     | 148  | range: 4 to 24 weeks |
| 15 | Loi, 2019 <sup>65</sup>              | longitudinal*     | Italy            | endometriosis                               | PEA                         | 600 mg/bid for 10 days; 400 mg m-PEA plus 40 mg polydatin bid                                                                               | 28   | 12.9                 |
| 16 | Naftali, 2019 <sup>66</sup>          | longitudinal*     | Israel           | inflammatory bowel disease                  | mixed herbal (CBD + THC)    | mean: 31 g/month                                                                                                                            | 127  | median: 176          |
| 17 | Perron, 2019 <sup>67</sup>           | cross-sectional*  | US               | mixed non-cancer pain                       | NR                          | mean: 21 g/day THC; 170 g/day CBD                                                                                                           | 618  | ≥12                  |
| 18 | Sagy, 2019 <sup>68</sup>             | longitudinal††    | Israel           | mixed cancer and non-cancer pain            | mixed herbal (CBD + THC)    | daily (n=580), weekly (n=85)                                                                                                                | 239  | 24                   |
| 19 | Sinclair, 2019 <sup>69</sup>         | cross-sectional*  | Australia        | endometriosis                               | mixed herbal (CBD + THC)    | median: 1000 mg/day cannabis                                                                                                                | 48   | NR                   |
| 20 | Ueberall, 2019 <sup>70</sup>         | longitudinal*     | Germany          | mixed cancer and non-cancer pain            | nabiximols (CBD + THC)      | median: 140 mg/day THC; 39 mg/day CBD                                                                                                       | 800  | 12                   |
| 21 | Vigil, 2017 <sup>71</sup>            | longitudinal*     | US               | mixed non-cancer pain                       | NR                          | less than once per week (n=12), once per week (n=6), two to six times per week (n=9), daily or multiple times per day (n=21)                | 37   | mean: 82.4           |
| 22 | Yassin, 2019 <sup>72</sup>           | longitudinal††    | Israel           | fibromyalgia                                | mixed herbal (CBD + THC)    | mean: 7.1 sprays/day                                                                                                                        | 31   | 24                   |
| 23 | Giorgi, 2020 <sup>73</sup>           | longitudinal††    | Italy            | fibromyalgia                                | extracts (CBD + THC)        | 20 to 30 g/month                                                                                                                            | 102  | 24                   |
| 24 |                                      |                   |                  |                                             |                             | 10 to 30 drops/day; no more than 120 drops/day                                                                                              |      |                      |

† NR=not reported, \*Patient-report, †Clinician-report, ††NR

41

42

43

44

45

46

47

1  
2  
3  
4  
5  
6  
7  
8  
9  
10  
11  
12  
13  
14  
15  
16  
17  
18  
19  
20  
21  
22  
23  
24  
25  
26  
27  
28  
29  
30  
31  
32  
33  
34  
35  
36  
37  
38  
39  
40  
41  
42  
43  
44  
45  
46  
47

For peer review only

**Table 2: Prevalence of adverse events from non-comparative studies**

| Outcome                                       | Number of studies | Number of participants | Duration of follow-up (weeks)         | Prevalence % (95% CI)                                                                                                                                                                                                                                                                                                                               | I <sup>2</sup> (τ <sup>2</sup> ) | Certainty | Reasons for downgrading                             |
|-----------------------------------------------|-------------------|------------------------|---------------------------------------|-----------------------------------------------------------------------------------------------------------------------------------------------------------------------------------------------------------------------------------------------------------------------------------------------------------------------------------------------------|----------------------------------|-----------|-----------------------------------------------------|
| <b>All adverse events</b>                     | 22                | 4,108                  | 4 to 94                               | The prevalence of adverse events ranged between 0% to 92.1%. Studies with less than 24 weeks of cannabis use typically reported fewer adverse events than those with more than 24 weeks. Patients using PEA experienced no adverse events. The evidence was overall very uncertain due to risk of bias and inconsistency.                           |                                  | very low  | risk of bias (3 levels), inconsistency              |
| <b>Adverse events causing discontinuation</b> | 20                | 6,509                  | 4 to 66                               | The prevalence of discontinuations due to adverse events ranged between 0% to 27.0%. Studies with less than 24 weeks of cannabis use typically reported fewer discontinuations than those with more than 24 weeks. Patients using PEA experienced no adverse events. The evidence was overall very uncertain due to risk of bias and inconsistency. |                                  | very low  | risk of bias (3 levels), inconsistency              |
| <b>Serious adverse events</b>                 | 24                | 4,273                  | 4 to 94                               | 1.2 (0.1 to 3.1)                                                                                                                                                                                                                                                                                                                                    | 91 (0.01273)                     | very low  | risk of bias (3 levels)                             |
| <b>Psychiatric adverse events</b>             |                   |                        |                                       |                                                                                                                                                                                                                                                                                                                                                     |                                  |           |                                                     |
| Psychiatric disorder                          | 4                 | 1,458                  | 12 to 66                              | 13.5 (2.6 to 30.6)                                                                                                                                                                                                                                                                                                                                  | 98 (0.0436)                      | very low  | risk of bias (3 levels), inconsistency, imprecision |
| Suicide                                       | 1                 | 215                    | 52                                    | 0 (0 to 0.8)                                                                                                                                                                                                                                                                                                                                        | NA                               | very low  | risk of bias (3 levels)                             |
| Suicidal thoughts                             | 1                 | 3,066                  | 52                                    | 0.1 (0 to 0.5)                                                                                                                                                                                                                                                                                                                                      | 44 (0.0003)                      | very low  | risk of bias (3 levels)                             |
| Depression                                    | 6                 | 4,144                  | 12 to 66                              | 1.7 (0.9 to 2.7)                                                                                                                                                                                                                                                                                                                                    | 71 (0.0011)                      | very low  | risk of bias (3 levels)                             |
| Mania                                         | 1                 | 215                    | 52                                    | 0.5 (0 to 2)                                                                                                                                                                                                                                                                                                                                        | NA                               | very low  | risk of bias (3 levels)                             |
| Hallucinations                                | 6                 | 3,583                  | 24 to 66                              | 0.5 (0.1 to 1.3)                                                                                                                                                                                                                                                                                                                                    | 69 (0.0012)                      | very low  | risk of bias (3 levels)                             |
| Delusions                                     | 4                 | 3,281                  | 52                                    | 0.4 (0.2 to 0.6)                                                                                                                                                                                                                                                                                                                                    | 0 (0)                            | very low  | risk of bias (3 levels)                             |
| Paranoia                                      | 3                 | 277                    | 52 to 94; one cross-sectional study   | 5.6 (0 to 19.2)                                                                                                                                                                                                                                                                                                                                     | 85 (0.0266)                      | very low  | risk of bias (3 levels), inconsistency, imprecision |
| Anxiety                                       | 5                 | 1,695                  | 12 to 94; two cross-sectional studies | 7.4 (0 to 26.9)                                                                                                                                                                                                                                                                                                                                     | 99 (0.0859)                      | very low  | risk of bias (3 levels), imprecision                |
| Euphoria                                      | 7                 | 4,501                  | 4 to 66                               | 2.1 (0.9 to 3.8)                                                                                                                                                                                                                                                                                                                                    | 96 (0.0028)                      | very low  | risk of bias (3 levels)                             |
| <b>Cognitive adverse events</b>               |                   |                        |                                       |                                                                                                                                                                                                                                                                                                                                                     |                                  |           |                                                     |



|                                  |   |       |                               |                     |                |          |                                                                   |
|----------------------------------|---|-------|-------------------------------|---------------------|----------------|----------|-------------------------------------------------------------------|
| Memory impairment                | 6 | 4,484 | 4 to 176                      | 5.3 (2.1 to 9.6)    | 96<br>(0.0126) | very low | risk of bias (3 levels)                                           |
| Confusion                        | 7 | 1,654 | 4 to 176                      | 1.8 (0.3 to 4.2)    | 81<br>(0.0056) | very low | risk of bias (3 levels)                                           |
| Disorientation                   | 6 | 4,485 | 12 to 52                      | 1.6 (0.6 to 3.0)    | 88<br>(0.0028) | very low | risk of bias (3 levels)                                           |
| Attention disorder or deficit    | 8 | 5,477 | 12 to 82                      | 3.4 (1.3 to 6.3)    | 95<br>(0.0082) | very low | risk of bias (3 levels)                                           |
| <b>Accidents and injuries</b>    |   |       |                               |                     |                |          |                                                                   |
| Falls                            | 1 | 215   | 52                            | 2.3 (0.7 to 4.9)    | NA             | very low | risk of bias (3 levels)                                           |
| Motor vehicle accidents          | 1 | 215   | 52                            | 0.5 (0 to 2.0)      | NA             | very low | risk of bias (3 levels)                                           |
| <b>Dependence and withdrawal</b> |   |       |                               |                     |                |          |                                                                   |
| Dependence                       | 3 | 1,824 | 12; one cross-sectional study | 4.4 (0.0 to 19.9)   | 99<br>(0.0488) | very low | risk of bias (3 levels), inconsistency, imprecision, indirectness |
| Withdrawal syndrome              | 2 | 424   | 32 to 52                      | 2.1 (0 to 8.2)      | 89<br>(0.0091) | very low | risk of bias (3 levels), indirectness                             |
| Withdrawal symptoms              | 1 | 618   | NA; cross-sectional           | 67.8 (64.1 to 71.4) | NA             | very low | risk of bias (3 levels), indirectness                             |

Table 3: Risk differences for adverse events from comparative studies

| Outcome                                | Exposure                          | Number of studies | Number of participants | Follow-up (weeks) | Risk with cannabis (/1000) | Risk with comparator (/1000) | Risk difference (95% CI) | Certainty | Reasons for downgrading              |
|----------------------------------------|-----------------------------------|-------------------|------------------------|-------------------|----------------------------|------------------------------|--------------------------|-----------|--------------------------------------|
| All adverse events                     | Nabilone vs. gabapentin           | 1                 | 220                    | 24                | 404                        | 534                          | -13.1% (-26.2 to 0)      | Very low  | Risk of bias (2 levels), imprecision |
| Adverse events causing discontinuation | Herbal cannabis vs. standard care | 1                 | 431                    | 52                | 47                         | 0                            | 4.7% (1.8 to 7.5)        | Low       | Risk of bias (2 levels),             |
|                                        | Nabilone vs. gabapentin           | 1                 | 220                    | 24                | 96                         | 190                          | -9.4% (-18.5 to -0.2)    | Very low  | Risk of bias (2 levels), imprecision |
| Serious                                | Herbal cannabis vs. standard care | 1                 | 431                    | 52                | 130                        | 194                          | 1.5% (-8.3 to 20.2) *    | Low       | Risk of bias, imprecision            |
|                                        | Nabilone vs. gabapentin           | 1                 | 220                    | 24                | 0                          | 0                            | 0% (0 to 0)              | Very low  | Risk of bias (2 levels), imprecision |
| Psychiatric disorder                   | Herbal cannabis vs. standard care | 1                 | 431                    | 52                | 219                        | 97                           | 16.9% (5.8 to 40.5) †    | Very low  | Risk of bias (2 levels), imprecision |
| Suicide                                | Herbal cannabis vs. standard care | 1                 | 431                    | 52                | 0                          | 5                            | -0.5% (-1.4 to 0.4)      | Low       | Risk of bias (2 levels)              |
| Mania                                  | Herbal cannabis vs. standard care | 1                 | 431                    | 52                | 5                          | 0                            | 0.5% (-0.4 to 1.4)       | Low       | Risk of bias (2 levels)              |
| Hallucinations                         | Herbal cannabis vs. standard care | 1                 | 431                    | 52                | 5                          | 0                            | 0.5% (-0.4 to 1.4)       | Low       | Risk of bias (2 levels)              |
| Delusions                              | Herbal cannabis vs. standard care | 1                 | 431                    | 52                | 0                          | 5                            | -0.5% (-1.4 to 0.4)      | Low       | Risk of bias (2 levels)              |
| Depression                             | Herbal cannabis vs. standard care | 1                 | 431                    | 52                | 47                         | 46                           | 0.1% (-4 to 4)           | Low       | Risk of bias (2 levels)              |
| Paranoia                               | Herbal cannabis vs. standard care | 1                 | 431                    | 52                | 9                          | 0                            | 0.9% (-0.4 to 2.2)       | Low       | Risk of bias (2 levels)              |
| Anxiety                                | Herbal cannabis vs. standard care | 1                 | 431                    | 52                | 47                         | 9                            | 3.8% (0.6 to 6.8)        | Low       | Risk of bias (2 levels)              |
| Euphoria                               | Herbal cannabis vs. standard care | 1                 | 431                    | 52                | 42                         | 0                            | 4.2% (1.5 to 6.9)        | Low       | Risk of bias (2 levels)              |

1  
2  
3  
4  
5  
6  
7  
8  
9  
10  
11  
12  
13  
14  
15  
16  
17  
18  
19  
20  
21  
22  
23  
24  
25  
26  
27  
28  
29  
30  
31  
32  
33  
34  
35  
36  
37  
38  
39  
40  
41  
42  
43  
44  
45  
46  
47

|                                 |                                   |   |     |    |    |    |                     |          |                          |
|---------------------------------|-----------------------------------|---|-----|----|----|----|---------------------|----------|--------------------------|
| <b>Memory impairment</b>        | Herbal cannabis vs. standard care | 1 | 431 | 52 | 19 | 0  | 1.9% (0.1 to 3.7)   | Low      | Risk of bias (2 levels)  |
| <b>Confusion</b>                | Herbal cannabis vs. standard care | 1 | 431 | 52 | 14 | 19 | -0.5% (-2.8 to 1.9) | Low      | Risk of bias (2 levels)  |
| <b>Disturbance in attention</b> | Herbal cannabis vs. standard care | 1 | 431 | 52 | 23 | 9  | 1.4% (-1 to 3.8)    | Low      | Risk of bias (2 levels)  |
| <b>Falls</b>                    | Herbal cannabis vs. standard care | 1 | 431 | 52 | 23 | 23 | 0% (-2.8 to 2.9)    | Low      | Risk of bias (2 levels)  |
| <b>Motor vehicle accidents</b>  | Herbal cannabis vs. standard care | 1 | 431 | 52 | 5  | 0  | 0.5% (-0.4 to 1.4)  | Low      | Risk of bias (2 levels)  |
| <b>Withdrawal syndrome</b>      | Herbal cannabis vs. standard care | 1 | 431 | 52 | 5  | 0  | 0.5% (-0.4 to 1.4)  | Very low | Risk of bias (2 levels), |

\* Risk difference calculated from adjusted incident rate ratio reported in study.

† Risk difference calculated from unadjusted incident rate ratio reported in study.

For peer review only

562 **References**

- 563 1. Mills SEE, Nicolson KP, Smith BH. Chronic pain: a review of its epidemiology and associated factors in  
564 population-based studies. *Br J Anaesth* 2019;123(2):e273-e83. doi: 10.1016/j.bja.2019.03.023  
565 [published Online First: 2019/05/14]
- 566 2. Mills SEE, van Hecke O, Smith BH. Handbook of Pain and Palliative Care: Biopsychosocial and  
567 Environmental Approaches for the Life Course. 2019.
- 568 3. Keyhani S, Steigerwald S, Ishida J, et al. Risks and Benefits of Marijuana Use: A National Survey of U.S.  
569 Adults. *Ann Intern Med* 2018;169(5):282-90. doi: 10.7326/m18-0810 [published Online First:  
570 2018/07/25]
- 571 4. Dai H, Richter KP. A National Survey of Marijuana Use Among US Adults With Medical Conditions,  
572 2016-2017. *JAMA Netw Open* 2019;2(9):e1911936. doi: 10.1001/jamanetworkopen.2019.11936  
573 [published Online First: 2019/09/21]
- 574 5. National Academies of Sciences E, Medicine, Health, et al. The National Academies Collection: Reports  
575 funded by National Institutes of Health. The Health Effects of Cannabis and Cannabinoids: The  
576 Current State of Evidence and Recommendations for Research. Washington (DC): National  
577 Academies Press (US) 2017.
- 578 6. Carr D, Schatman M. Cannabis for Chronic Pain: Not Ready for Prime Time. *American Journal of Public*  
579 *Health* 2019;109(1):50-51. doi: 10.2105/AJPH.2018.304593 [published Online First: 2019/01/]
- 580 7. Ziemianski D, Capler R, Tekanoff R, et al. Cannabis in medicine: a national educational needs  
581 assessment among Canadian physicians. *BMC Med Educ* 2015;15:52. doi: 10.1186/s12909-015-  
582 0335-0 [published Online First: 2015/04/19]
- 583 8. Kahan M, Srivastava A. Is there a role for marijuana in medical practice? No. *Can Fam Physician*  
584 2007;53(1):22-5. [published Online First: 2007/09/18]
- 585 9. Ware MA. Is there a role for marijuana in medical practice? Yes. *Can Fam Physician* 2007;53(1):22-5.  
586 [published Online First: 2007/09/18]
- 587 10. Deshpande A, Mailis-Gagnon A, Zoheiry N, et al. Efficacy and adverse effects of medical marijuana  
588 for chronic noncancer pain: Systematic review of randomized controlled trials. *Can Fam*  
589 *Physician* 2015;61(8):e372-81. [published Online First: 2015/10/28]
- 590 11. Wang L, Hong PJ, May C, et al. Medical cannabis or cannabinoids for chronic non-cancer and cancer  
591 related pain: a systematic review and meta-analysis of randomised clinical trials. *BMJ*  
592 2021;8;374:n1034. doi: 10.1136/bmj.n1034
- 593 12. Wang T, Collet JP, Shapiro S, et al. Adverse effects of medical cannabinoids: a systematic review.  
594 *Cmaj* 2008;178(13):1669-78. doi: 10.1503/cmaj.071178 [published Online First: 2008/06/19]
- 595 13. Whiting PF, Wolff RF, Deshpande S, et al. Cannabinoids for Medical Use: A Systematic Review and  
596 Meta-analysis. *Jama* 2015;313(24):2456-73. doi: 10.1001/jama.2015.6358 [published Online  
597 First: 2015/06/24]
- 598 14. Hill KP, Hurley-Welljams-Dorof WM. Low to moderate quality evidence demonstrates the potential  
599 benefits and adverse events of cannabinoids for certain medical indications. *Evid Based Med*  
600 2016;21(1):17. doi: 10.1136/ebmed-2015-110264 [published Online First: 2015/10/23]
- 601 15. Bair MJ, Robinson RL, Katon W, et al. Depression and pain comorbidity: a literature review. *Arch*  
602 *Intern Med* 2003;163(20):2433-45. doi: 10.1001/archinte.163.20.2433 [published Online First:  
603 2003/11/12]
- 604 16. Magni G, Marchetti M, Moreschi C, et al. Chronic musculoskeletal pain and depressive symptoms in  
605 the National Health and Nutrition Examination. I. Epidemiologic follow-up study. *Pain*  
606 1993;53(2):163-8. doi: 10.1016/0304-3959(93)90076-2 [published Online First: 1993/05/01]

- 1  
2  
3 607 17. Wilson KG, Eriksson MY, D'Eon JL, et al. Major depression and insomnia in chronic pain. *Clin J Pain*  
4 608 2002;18(2):77-83. doi: 10.1097/00002508-200203000-00002 [published Online First:  
5 609 2002/03/08]  
6  
7 610 18. Busse JW, Vankrunkelsven P, Zeng L, et al. Medical cannabis or cannabinoids for chronic pain: a  
8 611 clinical practice guideline. *BMJ* 2021;8;374:n2040(8;374:n2040) doi: 10.1136/bmj.n2040  
9 612 19. Siemieniuk RA, Agoritsas T, Macdonald H, et al. Introduction to BMJ Rapid Recommendations. *Bmj*  
10 613 2016;354:i5191. doi: 10.1136/bmj.i5191 [published Online First: 2016/09/30]  
11 614 20. Zeng L, Lytvyn L, Wang X, et al. Values and preferences towards medical cannabis among patients  
12 615 with chronic pain: A mixed methods systematic review. *BMJ Open* 2021;7;11(9):e050831 doi:  
13 616 10.1136/bmjopen-2021-050831  
14 617 21. Noori A, Miroshnychenko A, Shergill Y, et al. Opioid-Sparing effects of medical cannabis for chronic  
15 618 pain: A systematic review and meta-analysis of randomized and observational studies. *BMJ*  
16 619 2020;Submitted  
17  
18 620 22. Zorzela L, Loke YK, Ioannidis JP, et al. PRISMA harms checklist: improving harms reporting in  
19 621 systematic reviews. *Bmj* 2016;352:i157. doi: 10.1136/bmj.i157 [published Online First:  
20 622 2016/02/03]  
21 623 23. Busse JW, Bartlett SJ, Dougados M, et al. Optimal Strategies for Reporting Pain in Clinical Trials and  
22 624 Systematic Reviews: Recommendations from an OMERACT 12 Workshop. *J Rheumatol*  
23 625 2015;42(10):1962-70. doi: 10.3899/jrheum.141440 [published Online First: 2015/05/17]  
24 626 24. Sterne JA, Hernán MA, Reeves BC, et al. ROBINS-I: a tool for assessing risk of bias in non-randomised  
25 627 studies of interventions. *Bmj* 2016;355:i4919. doi: 10.1136/bmj.i4919 [published Online First:  
26 628 2016/10/14]  
27  
28 629 25. Zeraatkar D, JW B. Cannabis harms in chronic pain, 2021.  
29 630 26. Freeman MF, Tukey JW. Transformations related to the angular and the square root. *The Annals of*  
30 631 *Mathematical Statistics* 1950:607-11.  
31 632 27. DerSimonian R, Laird N. Meta-analysis in clinical trials. *Controlled clinical trials* 1986;7(3):177-88.  
32 633 28. Murad M, Montori V, Ioannidis J, et al. Fixed-effects and random-effects models. *Users' guide to the*  
33 634 *medical literature A manual for evidence-based clinical practice McGraw-Hill, 3rd ed New York,*  
34 635 *America* 2015  
35  
36 636 29. Rücker G, Schwarzer G, Carpenter JR, et al. Undue reliance on I(2) in assessing heterogeneity may  
37 637 mislead. *BMC Med Res Methodol* 2008;8:79. doi: 10.1186/1471-2288-8-79 [published Online  
38 638 First: 2008/11/28]  
39 639 30. Sun X, Briel M, Walter SD, et al. Is a subgroup effect believable? Updating criteria to evaluate the  
40 640 credibility of subgroup analyses. *Bmj* 2010;340:c117. doi: 10.1136/bmj.c117 [published Online  
41 641 First: 2010/04/01]  
42 642 31. Schandelmaier S, Briel M, Varadhan R, et al. Development of the Instrument to assess the Credibility  
43 643 of Effect Modification Analyses (ICEMAN) in randomized controlled trials and meta-analyses.  
44 644 *Cmaj* 2020;192(32):E901-e06. doi: 10.1503/cmaj.200077 [published Online First: 2020/08/12]  
45 645 32. Schwarzer G. meta: An R package for meta-analysis. *R news* 2007;7(3):40-45.  
46 646 33. Schünemann HJ, Cuello C, Akl EA, et al. GRADE guidelines: 18. How ROBINS-I and other tools to  
47 647 assess risk of bias in nonrandomized studies should be used to rate the certainty of a body of  
48 648 evidence. *J Clin Epidemiol* 2019;111:105-14. doi: 10.1016/j.jclinepi.2018.01.012 [published  
49 649 Online First: 2018/02/13]  
50  
51 650 34. Guyatt GH, Oxman AD, Vist GE, et al. GRADE: an emerging consensus on rating quality of evidence  
52 651 and strength of recommendations. *Bmj* 2008;336(7650):924-6. doi:  
53 652 10.1136/bmj.39489.470347.AD [published Online First: 2008/04/26]  
54  
55  
56  
57  
58  
59  
60

- 1  
2  
3 653 35. Santesso N, Glenton C, Dahm P, et al. GRADE guidelines 26: informative statements to communicate  
4 654 the findings of systematic reviews of interventions. *J Clin Epidemiol* 2020;119:126-35. doi:  
5 655 10.1016/j.jclinepi.2019.10.014 [published Online First: 2019/11/13]  
6 656 36. Ware MA, Doyle CR, Woods R, et al. Cannabis use for chronic non-cancer pain: results of a  
7 657 prospective survey. *Pain* 2003;102(1-2):211-6.  
8 658 37. Lynch ME, Young J, Clark AJ. A case series of patients using medicinal marijuana for management of  
9 659 chronic pain under the Canadian Marijuana Medical Access Regulations. *Journal of Pain &*  
10 660 *Symptom Management* 2006;32(5):497-501.  
11 661 38. Rog DJ, Nurmikko TJ, Young CA. Oromucosal delta9-tetrahydrocannabinol/cannabidiol for  
12 662 neuropathic pain associated with multiple sclerosis: an uncontrolled, open-label, 2-year  
13 663 extension trial. *Clinical Therapeutics* 2007;29(9):2068-79.  
14 664 39. Weber J, Schley M, Casutt M, et al. Tetrahydrocannabinol (Delta 9-THC) treatment in chronic central  
15 665 neuropathic pain and fibromyalgia patients: Results of a multicenter survey. *Anesthesiology*  
16 666 *Research and Practice* 2009;2009 (no pagination)(827290) doi:  
17 667 <http://dx.doi.org/10.1155/2009/827290>  
18 668 40. Bestard JA, Toth CC. An open-label comparison of nabilone and gabapentin as adjuvant therapy or  
19 669 monotherapy in the management of neuropathic pain in patients with peripheral neuropathy.  
20 670 *Pain Practice* 2011;11(4):353-68. doi: <https://dx.doi.org/10.1111/j.1533-2500.2010.00427.x>  
21 671 41. Fiz J, Duran M, Capella D, et al. Cannabis use in patients with Fibromyalgia: Effect on symptoms relief  
22 672 and health-related quality of life. *PLoS ONE* 2011;6 (4) (no pagination)(e18440) doi:  
23 673 <http://dx.doi.org/10.1371/journal.pone.0018440>  
24 674 42. Domínguez CM, Martín AD, Ferrer FG, et al. N-palmitoylethanolamide in the treatment of  
25 675 neuropathic pain associated with lumbosciatica. *Pain Manag* 2012;2(2):119-24. doi:  
26 676 10.2217/pmt.12.5 [published Online First: 2012/03/01]  
27 677 43. Gatti A, Lazzari M, Gianfelice V, et al. Palmitoylethanolamide in the treatment of chronic pain caused  
28 678 by different etiopathogenesis. *Pain Medicine* 2012;13(9):1121-30. doi:  
29 679 <https://dx.doi.org/10.1111/j.1526-4637.2012.01432.x>  
30 680 44. Toth C, Mawani S, Brady S, et al. An enriched-enrolment, randomized withdrawal, flexible-dose,  
31 681 double-blind, placebo-controlled, parallel assignment efficacy study of nabilone as adjuvant in  
32 682 the treatment of diabetic peripheral neuropathic pain. *Pain* 2012;153(10):2073-82. doi:  
33 683 <http://dx.doi.org/10.1016/j.pain.2012.06.024>  
34 684 45. Schifilliti C, Cucinotta L, Fedele V, et al. Micronized palmitoylethanolamide reduces the symptoms of  
35 685 neuropathic pain in diabetic patients. *Pain Res Treat* 2014;2014:849623. doi:  
36 686 10.1155/2014/849623 [published Online First: 2014/05/08]  
37 687 46. Storr M, Devlin S, Kaplan GG, et al. Cannabis use provides symptom relief in patients with  
38 688 inflammatory bowel disease but is associated with worse disease prognosis in patients with  
39 689 Crohn's disease. *Inflammatory Bowel Diseases* 2014;20(3):472-80. doi:  
40 690 <https://dx.doi.org/10.1097/01.MIB.0000440982.79036.d6>  
41 691 47. Del Giorno R, Skaper S, Paladini A, et al. Palmitoylethanolamide in Fibromyalgia: Results from  
42 692 Prospective and Retrospective Observational Studies. *Pain and Therapy* 2015;4(2):169-78. doi:  
43 693 <http://dx.doi.org/10.1007/s40122-015-0038-6>  
44 694 48. Hoggart B, Ratcliffe S, Ehler E, et al. A multicentre, open-label, follow-on study to assess the long-  
45 695 term maintenance of effect, tolerance and safety of THC/CBD oromucosal spray in the  
46 696 management of neuropathic pain. *Journal of Neurology* 2015;262(1):27-40. doi:  
47 697 <https://dx.doi.org/10.1007/s00415-014-7502-9>  
48 698 49. Ware MA, Wang T, Shapiro S, et al. Cannabis for the Management of Pain: Assessment of Safety  
49 699 Study (COMPASS). *Journal of Pain* 2015;16(12):1233-42. doi:  
50 700 <https://dx.doi.org/10.1016/j.jpain.2015.07.014>  
51  
52  
53  
54  
55  
56  
57  
58  
59  
60

- 1  
2  
3 701 50. Haroutounian S, Ratz Y, Ginosar Y, et al. The Effect of Medicinal Cannabis on Pain and Quality-of-Life  
4 702 Outcomes in Chronic Pain: A Prospective Open-label Study. *Clinical Journal of Pain*  
5 703 2016;32(12):1036-43.
- 6 704 51. Bellnier T, Brown G, Ortega T, et al. A preliminary evaluation of the efficacy, safety, and costs  
7 705 associated with the treatment of chronic pain with medical marijuana in the elderly. *Consultant*  
8 706 *Pharmacist* 2017;32 (10):597. doi: <http://dx.doi.org/10.4140/TCPn.2017.577>
- 9 707 52. Cranford JA, Arnedt JT, Conroy DA, et al. Prevalence and correlates of sleep-related problems in  
10 708 adults receiving medical cannabis for chronic pain. *Drug & Alcohol Dependence* 2017;180:227-  
11 709 33. doi: <https://dx.doi.org/10.1016/j.drugalcdep.2017.08.017>
- 12 710 53. Fanelli G, De Carolis G, Leonardi C, et al. Cannabis and intractable chronic pain: an explorative  
13 711 retrospective analysis of Italian cohort of 614 patients. *Journal of pain research* 2017;10:1217-  
14 712 24. doi: <https://dx.doi.org/10.2147/JPR.S132814>
- 15 713 54. Feingold D, Goor-Aryeh I, Bril S, et al. Problematic Use of Prescription Opioids and Medicinal  
16 714 Cannabis Among Patients Suffering from Chronic Pain. *Pain Medicine* 2017;18(2):294-306. doi:  
17 715 <https://dx.doi.org/10.1093/pm/pnw134>
- 18 716 55. Paladini A, Varrassi G, Bentivegna G, et al. Palmitoylethanolamide in the Treatment of Failed Back  
19 717 Surgery Syndrome. *Pain Res Treat* 2017;2017:1486010. doi: 10.1155/2017/1486010 [published  
20 718 Online First: 2017/09/07]
- 21 719 56. Passavanti MB, Fiore M, Sansone P, et al. The beneficial use of ultramicronized  
22 720 palmitoylethanolamide as add-on therapy to Tapentadol in the treatment of low back pain: a  
23 721 pilot study comparing prospective and retrospective observational arms. *BMC Anesthesiology*  
24 722 2017;17(1):171. doi: <https://dx.doi.org/10.1186/s12871-017-0461-9>
- 25 723 57. Schimrigk S, Marziniak M, Neubauer C, et al. Dronabinol Is a Safe Long-Term Treatment Option for  
26 724 Neuropathic Pain Patients. *European Neurology* 2017;78(5-6):320-29. doi:  
27 725 <https://dx.doi.org/10.1159/000481089>
- 28 726 58. Chirchiglia D, Chirchiglia P, Signorelli F. Nonsurgical lumbar radiculopathies treated with  
29 727 ultramicronized palmitoylethanolamide (umPEA): A series of 100 cases. *Neurologia i*  
30 728 *Neurochirurgia Polska* 2018;52(1):44-47. doi: <https://dx.doi.org/10.1016/j.pjnns.2017.11.002>
- 31 729 59. Crowley K, de Vries ST, Moreno-Sanz G. Self-Reported Effectiveness and Safety of Trokie R Lozenges:  
32 730 A Standardized Formulation for the Buccal Delivery of Cannabis Extracts. *Frontiers in*  
33 731 *Neuroscience* 2018;12:564. doi: <https://dx.doi.org/10.3389/fnins.2018.00564>
- 34 732 60. Habib G, Artul S. Medical Cannabis for the Treatment of Fibromyalgia. *JCR: Journal of Clinical*  
35 733 *Rheumatology* 2018;24(5):255-58. doi: <https://dx.doi.org/10.1097/RHU.0000000000000702>
- 36 734 61. Anderson SP, Zylla DM, McGriff DM, et al. Impact of medical cannabis on patient-reported symptoms  
37 735 for patients with cancer enrolled in Minnesota's medical cannabis program. *Journal of Oncology*  
38 736 *Practice* 2019;15(6):E338-E45. doi: <http://dx.doi.org/10.1200/JOP.18.00619>
- 39 737 62. Bonar EE, Cranford JA, Arterberry BJ, et al. Driving under the influence of cannabis among medical  
40 738 cannabis patients with chronic pain. *Drug & Alcohol Dependence* 2019;195:193-97. doi:  
41 739 <https://dx.doi.org/10.1016/j.drugalcdep.2018.11.016>
- 42 740 63. Cervigni M, Nasta L, Schievano C, et al. Micronized Palmitoylethanolamide-Polydatin Reduces the  
43 741 Painful Symptomatology in Patients with Interstitial Cystitis/Bladder Pain Syndrome. *BioMed*  
44 742 *Research International* 2019;2019 (no pagination)(9828397) doi:  
45 743 <http://dx.doi.org/10.1155/2019/9828397>
- 46 744 64. Cremer-Schaeffer P, Schmidt-Wolf G, Broich K. [Cannabis medicines in pain management : Interim  
47 745 analysis of the survey accompanying the prescription of cannabis-based medicines in Germany  
48 746 with regard to pain as primarily treated symptom]. *Der Schmerz* 2019;33(5):415-23. doi:  
49 747 <https://dx.doi.org/10.1007/s00482-019-00399-z>

- 1  
2  
3 748 65. Lejczak S, Rousselot H, Di Patrizio P, et al. Dronabinol use in France between 2004 and 2017. *Revue*  
4 749 *Neurologique* 2019;175(5):298-304. doi: <https://dx.doi.org/10.1016/j.neurol.2018.07.011>  
5 750 66. Loi ES, Pontis A, Cofelice V, et al. Effect of ultramicronized-palmitoylethanolamide and co-  
6 751 micronizedpalmitoylethanolamide/polydatin on chronic pelvic pain and quality of life in  
7 752 endometriosis patients: An open-label pilot study. *International Journal of Women's Health*  
8 753 2019;11:443-49. doi: <http://dx.doi.org/10.2147/IJWH.S204275>  
9 754 67. Naftali T, Bar-Lev Schleider L, Sklerovsky Benjaminov F, et al. Medical cannabis for inflammatory  
10 755 bowel disease: real-life experience of mode of consumption and assessment of side-effects.  
11 756 *European Journal of Gastroenterology & Hepatology* 2019;31(11):1376-81. doi:  
12 757 <https://dx.doi.org/10.1097/MEG.0000000000001565>  
13 758 68. Perron BE, Holt KR, Yeagley E, et al. Mental health functioning and severity of cannabis withdrawal  
14 759 among medical cannabis users with chronic pain. *Drug & Alcohol Dependence* 2019;194:401-09.  
15 760 doi: <https://dx.doi.org/10.1016/j.drugalcdep.2018.09.029>  
16 761 69. Sagy I, Bar-Lev Schleider L, Abu-Shakra M, et al. Safety and Efficacy of Medical Cannabis in  
17 762 Fibromyalgia. *Journal of Clinical Medicine* 2019;8(6):05. doi:  
18 763 <https://dx.doi.org/10.3390/jcm8060807>  
19 764 70. Sinclair J, Smith CA, Abbott J, et al. Cannabis Use, a Self-Management Strategy Among Australian  
20 765 Women With Endometriosis: Results From a National Online Survey. *Journal of Obstetrics &*  
21 766 *Gynaecology Canada: JOGC* 2020;42(3):256-61. doi:  
22 767 <https://dx.doi.org/10.1016/j.jogc.2019.08.033>  
23 768 71. Ueberall MA, Essner U, Mueller-Schwefe GHH. Effectiveness and tolerability of THC:CBD oromucosal  
24 769 spray as add-on measure in patients with severe chronic pain: Analysis of 12-week open-label  
25 770 real-world data provided by the German pain e-registry. *Journal of Pain Research* 2019;12:1577-  
26 771 604. doi: <http://dx.doi.org/10.2147/JPR.S192174>  
27 772 72. Vigil JM, Stith SS, Adams IM, et al. Associations between medical cannabis and prescription opioid  
28 773 use in chronic pain patients: A preliminary cohort study. *PLoS ONE [Electronic Resource]*  
29 774 2017;12(11):e0187795. doi: <https://dx.doi.org/10.1371/journal.pone.0187795>  
30 775 73. Yassin M, Oron A, Robinson D. Effect of adding medical cannabis to analgesic treatment in patients  
31 776 with low back pain related to fibromyalgia: an observational cross-over single centre study.  
32 777 *Clinical & Experimental Rheumatology* 2019;37 Suppl 116(1):13-20.  
33 778 74. Giorgi V, Bongiovanni S, Atzeni F, et al. Adding medical cannabis to standard analgesic treatment for  
34 779 fibromyalgia: a prospective observational study. *Clinical & Experimental Rheumatology* 2020;38  
35 780 Suppl 123(1):53-59.  
36 781 75. Grant BF, Dawson DA, Stinson FS, et al. The Alcohol Use Disorder and Associated Disabilities  
37 782 Interview Schedule-IV (AUDADIS-IV): reliability of alcohol consumption, tobacco use, family  
38 783 history of depression and psychiatric diagnostic modules in a general population sample. *Drug*  
39 784 *Alcohol Depend* 2003;71(1):7-16. doi: 10.1016/s0376-8716(03)00070-x [published Online First:  
40 785 2003/06/25]  
41 786 76. Humeniuk R, Ali R. Validation of the Alcohol, Smoking and Substance Involvement Screening Test  
42 787 (ASSIST) and pilot brief intervention: a technical report of phase II findings of the WHO ASSIST  
43 788 Project. Validation of the alcohol, smoking and substance involvement screening test (ASSIST)  
44 789 and pilot brief intervention: a technical report of phase II findings of the WHO ASSIST  
45 790 Project2006.  
46 791 77. Stockings E, Campbell G, Hall WD, et al. Cannabis and cannabinoids for the treatment of people with  
47 792 chronic noncancer pain conditions: a systematic review and meta-analysis of controlled and  
48 793 observational studies. *Pain* 2018;159(10):1932-54. doi: 10.1097/j.pain.0000000000001293  
49 794 [published Online First: 2018/05/31]



- 1  
2  
3 795 78. Allan GM, Finley CR, Ton J, et al. Systematic review of systematic reviews for medical cannabinoids:  
4 796 Pain, nausea and vomiting, spasticity, and harms. *Can Fam Physician* 2018;64(2):e78-e94.  
5 797 [published Online First: 2018/02/17]  
6  
7 798 79. Campeny E, López-Pelayo H, Nutt D, et al. The blind men and the elephant: Systematic review of  
8 799 systematic reviews of cannabis use related health harms. *Eur Neuropsychopharmacol* 2020;33:1-  
9 800 35. doi: 10.1016/j.euroneuro.2020.02.003 [published Online First: 2020/03/14]  
10 801 80. Memedovich KA, Dowsett LE, Spackman E, et al. The adverse health effects and harms related to  
11 802 marijuana use: an overview review. *CMAJ Open* 2018;6(3):E339-e46. doi:  
12 803 10.9778/cmajo.20180023 [published Online First: 2018/08/18]  
13 804 81. Nugent SM, Morasco BJ, O'Neil ME, et al. The Effects of Cannabis Among Adults With Chronic Pain  
14 805 and an Overview of General Harms: A Systematic Review. *Ann Intern Med* 2017;167(5):319-31.  
15 806 doi: 10.7326/m17-0155 [published Online First: 2017/08/15]  
16 807 82. Els C, Jackson TD, Kunyk D, et al. Adverse events associated with medium- and long-term use of  
17 808 opioids for chronic non-cancer pain: an overview of Cochrane Reviews. *Cochrane Database Syst*  
18 809 *Rev* 2017;10(10):Cd012509. doi: 10.1002/14651858.CD012509.pub2 [published Online First:  
20 810 2017/10/31]  
21 811 83. Rücker G, Schumacher M. Simpson's paradox visualized: the example of the rosiglitazone meta-  
22 812 analysis. *BMC Med Res Methodol* 2008;8:34. doi: 10.1186/1471-2288-8-34 [published Online  
23 813 First: 2008/06/03]  
24 814 84. Diagnostic and statistical manual of mental disorders : DSM-5. Arlington, VA: American Psychiatric  
25 815 Association 2013.  
26 816 85. Goodman JE, McGrath PJ. The epidemiology of pain in children and adolescents: a review. *Pain*  
27 817 1991;46(3):247-64. doi: 10.1016/0304-3959(91)90108-a [published Online First: 1991/09/01]  
28 818 86. Myles H, Myles N, Large M. Cannabis use in first episode psychosis: Meta-analysis of prevalence, and  
29 819 the time course of initiation and continued use. *Aust N Z J Psychiatry* 2016;50(3):208-19. doi:  
30 820 10.1177/0004867415599846 [published Online First: 2015/08/20]  
31 821 87. Veroniki AA, Jackson D, Bender R, et al. Methods to calculate uncertainty in the estimated overall  
32 822 effect size from a random-effects meta-analysis. *Res Synth Methods* 2019;10(1):23-43. doi:  
33 823 10.1002/jrsm.1319 [published Online First: 2018/08/22]  
34 824 88. Shanthanna H, Gilron I, Rajarathinam M, et al. Benefits and safety of gabapentinoids in chronic low  
35 825 back pain: A systematic review and meta-analysis of randomized controlled trials. *PLoS Med*  
36 826 2017;14(8):e1002369. doi: 10.1371/journal.pmed.1002369 [published Online First: 2017/08/16]  
37 827 89. Ferraro MC, Bagg MK, Wewege MA, et al. Efficacy, acceptability, and safety of antidepressants for  
38 828 low back pain: a systematic review and meta-analysis. *Syst Rev* 2021;10(1):62. doi:  
39 829 10.1186/s13643-021-01599-4 [published Online First: 2021/02/26]  
40 830 90. Busse JW, Craigie S, Juurlink DN, et al. Guideline for opioid therapy and chronic noncancer pain.  
41 831 *Cmaj* 2017;189(18):E659-e66. doi: 10.1503/cmaj.170363 [published Online First: 2017/05/10]

832

Figure 1: Study selection process

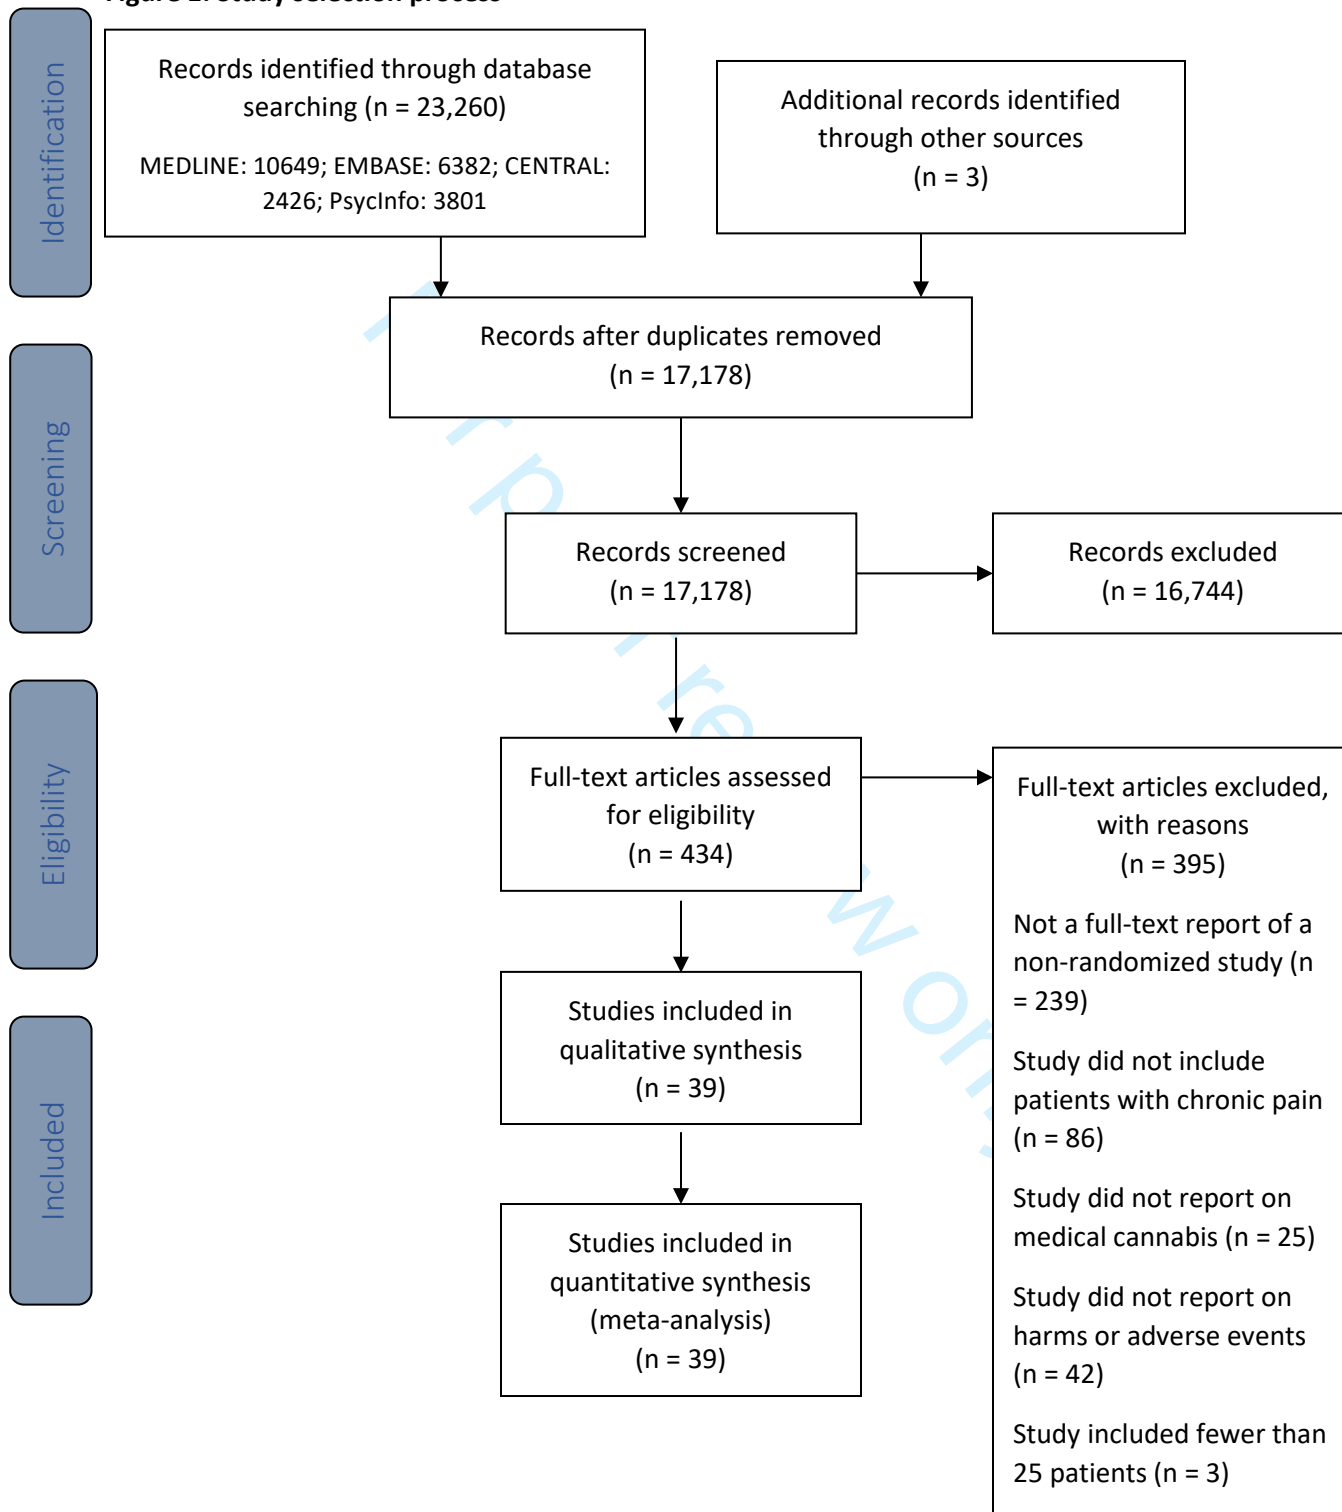

Figure 2: Forest plot of the meta-analysis for serious adverse events stratified by type of medical cannabis

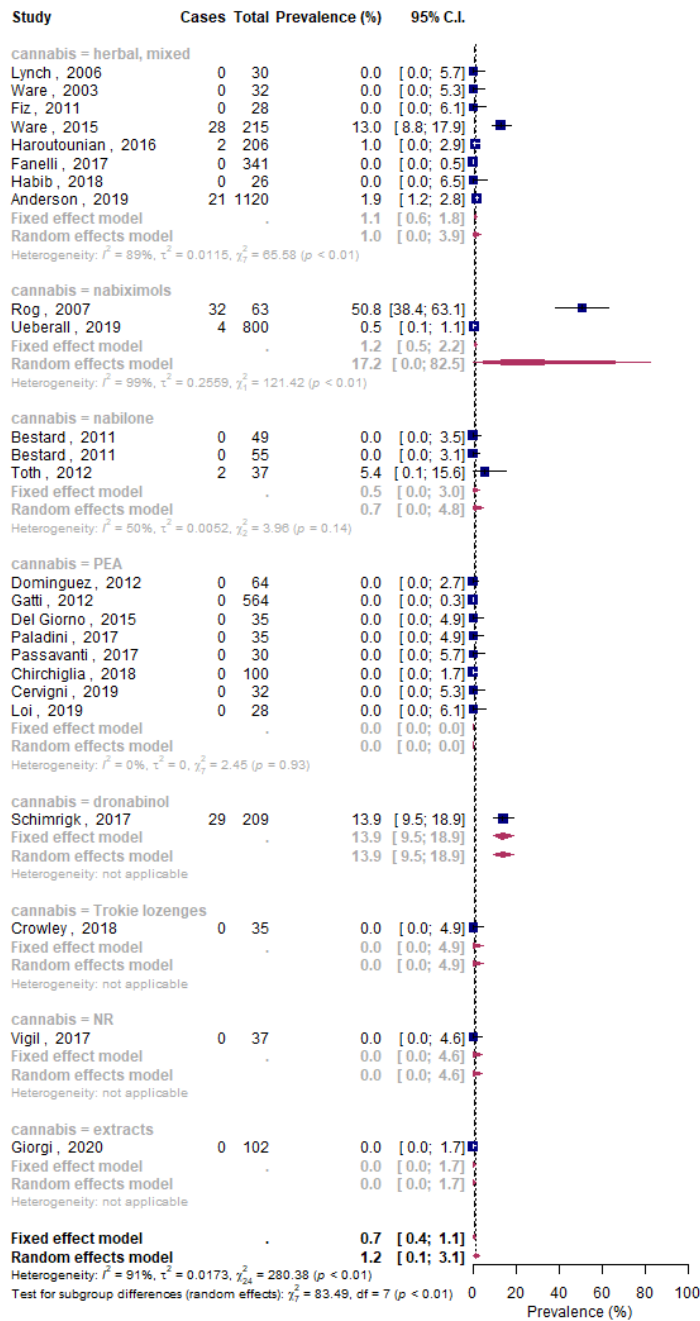

# Long-term and serious harms of medical cannabis and cannabinoids for chronic pain: A systematic review and meta-analysis of non-randomized studies

## Appendix

Dr. Jason Busse

[bussejw@mcmaster.ca](mailto:bussejw@mcmaster.ca)

## Contents

|                                                                                                       |    |
|-------------------------------------------------------------------------------------------------------|----|
| Appendix 1: Search strategy .....                                                                     | 3  |
| Appendix 2: Detailed methods for the assessment of risk of bias .....                                 | 18 |
| Appendix 3: List of included studies .....                                                            | 19 |
| Appendix 4: Studies excluded at the full-text screening stage.....                                    | 23 |
| Appendix 5: Risk of bias ratings .....                                                                | 52 |
| Appendix 6: Results for all adverse events (subgroup by design) .....                                 | 53 |
| Appendix 7: Results for all adverse events (subgroup by duration).....                                | 54 |
| Appendix 8: Results for all adverse events (subgroup by cannabis).....                                | 55 |
| Appendix 9: Results for all adverse events (subgroup by selection bias).....                          | 56 |
| Appendix 10: Results for adverse events leading to discontinuation (subgroup by duration) .....       | 57 |
| Appendix 11: Results for adverse events leading to discontinuation (subgroup by cannabis) .....       | 58 |
| Appendix 12: Results for adverse events leading to discontinuation (subgroup by selection bias) ..... | 59 |
| Appendix 13: Results for serious adverse events (subgroup by design) .....                            | 60 |
| Appendix 14: Results for serious adverse events (subgroup by duration) .....                          | 61 |
| Appendix 15: Results for serious adverse events (subgroup by selection bias) .....                    | 62 |
| Appendix 16: Results for psychiatric adverse events .....                                             | 63 |
| Appendix 17: Results for suicide .....                                                                | 64 |
| Appendix 18: Results for suicidal thoughts.....                                                       | 65 |

|    |                                                       |    |
|----|-------------------------------------------------------|----|
| 1  |                                                       |    |
| 2  |                                                       |    |
| 3  | Appendix 19: Results for depression .....             | 66 |
| 4  |                                                       |    |
| 5  | Appendix 20: Results for mania .....                  | 67 |
| 6  |                                                       |    |
| 7  | Appendix 21: Results for hallucinations.....          | 68 |
| 8  |                                                       |    |
| 9  | Appendix 22: Results for delusions.....               | 69 |
| 10 |                                                       |    |
| 11 | Appendix 23: Results for paranoia.....                | 70 |
| 12 |                                                       |    |
| 13 | Appendix 24: Results for anxiety .....                | 71 |
| 14 |                                                       |    |
| 15 | Appendix 25: Results for euphoria.....                | 72 |
| 16 |                                                       |    |
| 17 | Appendix 26: Results for memory impairment.....       | 73 |
| 18 |                                                       |    |
| 19 | Appendix 27: Results for confusion .....              | 74 |
| 20 |                                                       |    |
| 21 | Appendix 28: Results for disorientation .....         | 75 |
| 22 |                                                       |    |
| 23 | Appendix 29: Results for impaired attention.....      | 76 |
| 24 |                                                       |    |
| 25 | Appendix 30: Results for falls.....                   | 77 |
| 26 |                                                       |    |
| 27 | Appendix 31: Results for motor vehicle accidents..... | 78 |
| 28 |                                                       |    |
| 29 | Appendix 32: Results for dependence .....             | 79 |
| 30 |                                                       |    |
| 31 | Appendix 33: Results for withdrawal symptoms .....    | 80 |
| 32 |                                                       |    |
| 33 | Appendix 34: Results for withdrawal syndrome.....     | 81 |
| 34 |                                                       |    |
| 35 |                                                       |    |
| 36 |                                                       |    |
| 37 |                                                       |    |
| 38 |                                                       |    |
| 39 |                                                       |    |
| 40 |                                                       |    |
| 41 |                                                       |    |
| 42 |                                                       |    |
| 43 |                                                       |    |
| 44 |                                                       |    |
| 45 |                                                       |    |
| 46 |                                                       |    |
| 47 |                                                       |    |
| 48 |                                                       |    |
| 49 |                                                       |    |
| 50 |                                                       |    |
| 51 |                                                       |    |
| 52 |                                                       |    |
| 53 |                                                       |    |
| 54 |                                                       |    |
| 55 |                                                       |    |
| 56 |                                                       |    |
| 57 |                                                       |    |
| 58 |                                                       |    |
| 59 |                                                       |    |
| 60 |                                                       |    |

## **Appendix 1: Search strategy**

|          |       |
|----------|-------|
| MEDLINE  | 10649 |
| EMBASE   | 6382  |
| Central  | 2426  |
| PsycInfo | 3801  |
| Subtotal | 23260 |
| -dupes   | -6085 |
| Total    | 17175 |

April 1, 2020

Database: OVID Medline Epub Ahead of Print, In-Process & Other Non-Indexed Citations, Ovid MEDLINE(R) Daily and Ovid MEDLINE(R) 1946 to Present

Search Strategy:

- 1 Epidemiologic Studies/ (8256)
- 2 exp Case-Control Studies/ (1067341)
- 3 exp Cohort Studies/ (1974212)
- 4 Case control.tw. (123081)
- 5 (cohort adj (study or studies)).tw. (199133)

- 1
- 2
- 3 6 Cohort analy\$.tw. (7799)
- 4
- 5
- 6
- 7 7 (Follow up adj (study or studies)).tw. (48708)
- 8
- 9
- 10
- 11 8 (observational adj (study or studies)).tw. (103255)
- 12
- 13
- 14
- 15 9 Longitudinal.tw. (239715)
- 16
- 17
- 18 10 Retrospective.tw. (515751)
- 19
- 20
- 21
- 22 11 Cross sectional.tw. (342224)
- 23
- 24
- 25
- 26 12 Cross-sectional studies/ (322752)
- 27
- 28
- 29
- 30 13 or/1-12 (2953281)
- 31
- 32
- 33 14 exp animals/ not humans.sh. (4685189)
- 34
- 35
- 36
- 37 15 13 not 14 (2889789)
- 38
- 39

40 Annotation: SIGN observational studies filter

- 41
- 42
- 43
- 44 16 randomized controlled trial.pt. (503041)
- 45
- 46
- 47
- 48 17 controlled clinical trial.pt. (93591)
- 49
- 50
- 51
- 52 18 randomized.ab. (474985)
- 53
- 54
- 55
- 56 19 placebo.ab. (206552)
- 57
- 58
- 59
- 60

1  
2  
3  
4  
5 20 drug therapy.fs. (2191450)  
6  
7

8  
9 21 randomly.ab. (330409)  
10

11  
12 22 trial.ab. (500400)  
13  
14

15  
16 23 groups.ab. (2028909)  
17  
18

19  
20 24 or/16-23 (4670111)  
21  
22

23  
24 25 exp animals/ not humans.sh. (4685189)  
25  
26

27  
28 26 24 not 25 (4048339)  
29  
30

31 Annotation: Cochrane HSSS RCT filter  
32  
33

34  
35 27 15 or 26 (6033576)  
36  
37

38  
39 Annotation: study design filter broad  
40  
41

42  
43 28 Cannabis/ (8968)  
44  
45

46  
47 29 exp cannabinoids/ or cannabidiol/ or cannabinol/ or dronabinol/ (13810)  
48  
49

50  
51 30 Endocannabinoids/ (5630)  
52  
53

54  
55 31 exp Receptors, Cannabinoid/ (9240)  
56  
57  
58  
59  
60



1  
2  
3 32 (Cannabis or cannabiniol or cannabinoid\* or cannabidiol or bhang or cannador or charas or ganja or  
4 ganjah or hashish or hemp or marihuana or marijuana or nabilone or cesamet or cesametic or ajulemic  
5 acid or cannabichromene or cannabielsoin or cannabigerol or tetrahydrocannabinol or dronabinol or  
6 levonantradol or nabiximols or palmidrol or tetrahydrocannabinolic acid or tetrahydro cannabiniol or  
7 marinol or tetranabinex or sativex or endocannabinoid\*).mp. (54925)  
8  
9

10  
11  
12 33 or/28-32 (54925)  
13

14  
15 Annotation: strategy from 2020 cannabis review  
16  
17

18  
19 34 27 and 33 (16307)  
20  
21

22  
23 Annotation: cannabis AND study design filter  
24  
25

26  
27 35 exp "Drug-Related Side Effects and Adverse Reactions"/ (114376)  
28  
29

30  
31 36 (ae or to or po or co).fs. (3890270)  
32  
33

34  
35 37 (safe or safety).ti,ab. (758301)  
36  
37

38  
39 38 side effect\$.ti,ab. (243706)  
40  
41

42 39 ((adverse or undesirable or harms\$ or serious or toxic) adj3 (effect\$ or reaction\$ or event\$ or  
43 outcome\$)).ti,ab. (501888)  
44  
45

46  
47 40 exp Product Surveillance, Postmarketing/ (15237)  
48  
49

50  
51 41 adverse drug reaction reporting systems/ (7463)  
52  
53

54  
55 42 clinical trials, phase iv/ (295)  
56  
57

1  
2  
3  
4  
5 43 exp Poisoning/ (156177)  
6  
7

8  
9 44 exp Substance-Related Disorders/ (274845)  
10

11  
12 45 Abnormalities, Drug-Induced/ (14514)  
13  
14

15  
16 46 Drug Monitoring/ (20599)  
17  
18

19  
20 47 exp Drug Hypersensitivity/ (45642)  
21  
22

23  
24 48 (toxicity or complication\$ or noxious or tolerability).ti,ab. (1298802)  
25  
26

27  
28 49 or/35-48 (5596308)  
29  
30

31 Annotation: OVID AE filter  
32  
33

34  
35 50 34 and 49 (10649)  
36  
37

38  
39 Annotation: Study design filter AND Cannabis AND AE Filter (broad)  
40  
41

42 Database: Embase <1974 to 2020 March 31>  
43  
44

45  
46 Search Strategy:  
47  
48

49  
50 -----  
51  
52  
53 1 cannabis/ (33859)  
54  
55  
56  
57  
58  
59  
60

1  
2  
3 2 exp cannabinoid/ (65694)  
4  
5

6  
7 3 medical cannabis/ (2104)  
8  
9

10  
11 4 exp cannabinoid receptor/ (14557)  
12  
13

14  
15 5 exp endocannabinoid/ (8589)  
16  
17

18 6 (Cannabis or cannabinol or cannabinoid\* or cannabidiol or bhang or cannador or charas or ganja or  
19 ganjah or hashish or hemp or marihuana or marijuana or nabilone or cesamet or cesametic or ajulemic  
20 acid or cannabichromene or cannabielsoin or cannabigerol or tetrahydrocannabinol or dronabinol or  
21 levonantradol or nabiximols or palmidrol or tetrahydrocannabinolic acid or tetrahydro cannabinol or  
22 marinol or tetranabinex or sativex or endocannabinoid\*).mp. [mp=title, abstract, heading word, drug  
23 trade name, original title, device manufacturer, drug manufacturer, device trade name, keyword,  
24 floating subheading word, candidate term word] (86550)  
25  
26  
27

28  
29 7 or/1-6 (87843)  
30  
31

32  
33 Annotation: cannabis  
34  
35

36  
37 8 clinical study/ (154879)  
38  
39

40  
41 9 case control study/ (153658)  
42  
43

44  
45 10 family study/ (26012)  
46  
47

48  
49 11 longitudinal study/ (137463)  
50  
51

52  
53 12 retrospective study/ (897628)  
54  
55

56  
57 13 prospective study/ (590879)  
58  
59

1  
2  
3  
4  
5 14 randomized controlled trials/ (176633)  
6  
7

8  
9 15 13 not 14 (584662)  
10  
11

12 16 cohort analysis/ (564001)  
13  
14  
15

16 17 (Cohort adj (study or studies)).mp. [mp=title, abstract, heading word, drug trade name, original  
17 title, device manufacturer, drug manufacturer, device trade name, keyword, floating subheading word,  
18 candidate term word] (296961)  
19  
20

21  
22 23 18 (Case control adj (study or studies)).mp. [mp=title, abstract, heading word, drug trade name,  
24 original title, device manufacturer, drug manufacturer, device trade name, keyword, floating subheading  
25 word, candidate term word] (211490)  
26  
27

28  
29 30 19 (follow up adj (study or studies)).mp. [mp=title, abstract, heading word, drug trade name, original  
31 title, device manufacturer, drug manufacturer, device trade name, keyword, floating subheading word,  
32 candidate term word] (65948)  
33  
34

35 36 20 (observational adj (study or studies)).mp. [mp=title, abstract, heading word, drug trade name,  
37 original title, device manufacturer, drug manufacturer, device trade name, keyword, floating subheading  
38 word, candidate term word] (242526)  
39  
40

41 42 21 (epidemiologic\$ adj (study or studies)).mp. [mp=title, abstract, heading word, drug trade name,  
43 original title, device manufacturer, drug manufacturer, device trade name, keyword, floating subheading  
44 word, candidate term word] (109669)  
45  
46

47 48 22 (cross sectional adj (study or studies)).mp. [mp=title, abstract, heading word, drug trade name,  
49 original title, device manufacturer, drug manufacturer, device trade name, keyword, floating subheading  
50 word, candidate term word] (385983)  
51  
52

53 23 or/8-12,15-22 (2808984)  
54  
55  
56  
57

1  
2  
3 Annotation: SIGN observational studies filter  
4  
5

6  
7 24 7 and 23 (9720)  
8  
9

10 Annotation: cannabis AND observational studies  
11  
12

13  
14 25 randomized controlled trial/ (597702)  
15  
16

17  
18 26 Controlled clinical study/ (463832)  
19  
20

21  
22 27 random\$.ti,ab. (1518977)  
23  
24

25  
26 28 randomization/ (86491)  
27  
28

29  
30 29 intermethod comparison/ (258334)  
31  
32

33  
34 30 placebo.ti,ab. (303428)  
35  
36

37  
38 31 (compare or compared or comparison).ti. (504683)  
39  
40

41 32 ((evaluated or evaluate or evaluating or assessed or assess) and (compare or compared or  
42 comparing or comparison)).ab. (2082229)  
43  
44

45  
46 33 (open adj label).ti,ab. (78190)  
47  
48

49  
50 34 ((double or single or doubly or singly) adj (blind or blinded or blindly)).ti,ab. (229917)  
51  
52

53  
54 35 double blind procedure/ (171048)  
55  
56  
57  
58  
59  
60

1  
2  
3 36 parallel group\$1.ti,ab. (25201)  
4  
5

6  
7 37 (crossover or cross over).ti,ab. (104010)  
8  
9

10  
11 38 ((assign\$ or match or matched or allocation) adj5 (alternate or group\$1 or intervention\$1 or  
12 patient\$1 or subject\$1 or participant\$1)).ti,ab. (325625)  
13  
14

15  
16 39 (assigned or allocated).ti,ab. (383429)  
17  
18

19  
20 40 (controlled adj7 (study or design or trial)).ti,ab. (343515)  
21  
22

23  
24 41 (volunteer or volunteers).ti,ab. (244577)  
25  
26

27  
28 42 human experiment/ (490389)  
29  
30

31  
32 43 trial.ti. (295850)  
33  
34

35  
36 44 or/25-43 (4952112)  
37

38  
39 Annotation: Cochrane RCT filter  
40  
41

42  
43 45 7 and 44 (14036)  
44  
45

46  
47 Annotation: cannabis AND RCTs  
48  
49

50  
51 46 24 or 45 (21357)  
52

53  
54 Annotation: cannabis AND (Obs studies OR RCTs)  
55  
56  
57  
58  
59  
60

1  
2  
3 47 7 and (23 or 44) (21357)  
4  
5  
6

7 Annotation: logic check  
8  
9

10 48 (ae or si or to or co).fs. (3204803)  
11  
12

13  
14 49 (safe or safety).ti,ab. (1154971)  
15  
16

17  
18 50 side effect\$.ti,ab. (358075)  
19  
20

21  
22 51 ((adverse or undesirable or harm\$ or serious or toxic) adj3 (effect\$ or reaction\$ or event\$ or  
23 outcome\$)).ti,ab. (787739)  
24  
25

26  
27 52 exp adverse drug reaction/ (522775)  
28  
29

30  
31 53 exp drug toxicity/ (125051)  
32  
33

34  
35 54 exp intoxication/ (366563)  
36  
37

38  
39 55 exp drug safety/ (393912)  
40  
41

42  
43 56 exp drug monitoring/ (53058)  
44  
45

46  
47 57 exp drug hypersensitivity/ (56248)  
48  
49

50  
51 58 exp postmarketing surveillance/ (35831)  
52  
53

54  
55 59 exp drug surveillance program/ (26017)  
56  
57  
58  
59  
60

60 exp phase iv clinical trial/ (3822)

61 (toxicity or complication\$ or noxious or tolerability).ti,ab. (1868476)

62 or/48-61 (6002309)

Annotation: OVID AE filter 1-14

63 47 and 62 (6382)

Cannabis AEs

Search Name: cannabis AEs

Date Run: 01/04/2020 18:42:40

Comment:

ID Search Hits

#1 MeSH descriptor: [Cannabis] explode all trees 298

#2 MeSH descriptor: [Cannabinoids] explode all trees 790

#3 MeSH descriptor: [Endocannabinoids] explode all trees 48



- 1  
2  
3 #4 MeSH descriptor: [Endocannabinoids] explode all trees 48  
4  
5  
6  
7 #5 (Cannabis or cannabinal or cannabinoid\* or cannabidiol or bhang or cannador or charas or ganja  
8 or ganjah or hashish or hemp or marihuana or marijuana or nabilone or cesamet or cesametic or  
9 ajulemic acid or cannabichromene or cannabielsoin or cannabigerol or tetrahydrocannabinol or  
10 dronabinol or levonantradol or nabiximols or palmidrol or tetrahydrocannabinolic acid or tetrahydro  
11 cannabinol or marinol or tetranabinex or sativex or endocannabinoid\*):ti,ab,kw (Word variations have  
12 been searched) 4370  
13  
14  
15  
16  
17 #6 #1 or #2 or #3 or #4 or #5 4370  
18  
19  
20 #7 MeSH descriptor: [Drug-Related Side Effects and Adverse Reactions] explode all trees 3463  
21  
22  
23  
24 #8 MeSH descriptor: [] explode all trees and with qualifier(s): [adverse effects - AE, toxicity - TO,  
25 poisoning - PO, complications - CO] 169278  
26  
27  
28  
29 #9 (safe or safety):ti,ab,kw (Word variations have been searched) 258304  
30  
31  
32  
33 #10 (side effect\*):ti,ab,kw (Word variations have been searched) 149400  
34  
35  
36  
37 #11 ((adverse or undesirable or harms\* or serious or toxic) near/3 (effect\* or reaction\* or event\* or  
38 outcome\*)):ti,ab,kw (Word variations have been searched) 279577  
39  
40  
41  
42 #12 MeSH descriptor: [Product Surveillance, Postmarketing] explode all trees 191  
43  
44  
45 #13 MeSH descriptor: [Adverse Drug Reaction Reporting Systems] explode all trees 82  
46  
47  
48  
49 #14 MeSH descriptor: [Clinical Trial, Phase IV] explode all trees 0  
50  
51  
52  
53 #15 MeSH descriptor: [Poisoning] explode all trees 2101  
54  
55  
56  
57  
58  
59  
60

- 1  
2  
3 #16 MeSH descriptor: [Substance-Related Disorders] explode all trees 14586  
4  
5  
6  
7 #17 MeSH descriptor: [Abnormalities, Drug-Induced] explode all trees 47  
8  
9  
10  
11 #18 MeSH descriptor: [Drug Monitoring] explode all trees 1725  
12  
13  
14 #19 MeSH descriptor: [Drug Hypersensitivity] explode all trees 965  
15  
16  
17  
18 #20 (toxicity or complication\* or noxious or tolerability):ti,ab,kw (Word variations have been  
19 searched) 332240  
20  
21  
22  
23 #21 #7 or #8 or #9 or #10 or #11 or #12 or #13 or #14 or #15 or #16 or #17 or #18 or #19 or #20  
24 626064  
25  
26  
27  
28 #22 #6 and #21 in Trials 2426  
29  
30

31 PsycInfo

32  
33  
34  
35 Database: APA PsycInfo <1806 to March Week 4 2020>  
36  
37  
38

39 Search Strategy:  
40  
41  
42  
43  
44  
45  
46

47 1 exp cannabis/ or exp cannabinoids/ or tetrahydrocannabinol/ (12819)  
48  
49

50  
51 2 (Cannabis or cannabinal or cannabinoid\* or cannabidiol or bhang or cannador or charas or ganja or  
52 ganjah or hashish or hemp or marihuana or marijuana or nabilone or cesamet or cesametic or ajulemic  
53 acid or cannabichromene or cannabielsoin or cannabigerol or tetrahydrocannabinol or dronabinol or  
54 levonantradol or nabiximols or palmidrol or tetrahydrocannabinolic acid or tetrahydro cannabinal or  
55  
56  
57  
58  
59  
60

1  
2  
3 marinol or tetranabinex or sativex or endocannabinoid\*).mp. [mp=title, abstract, heading word, table of  
4 contents, key concepts, original title, tests & measures, mesh] (26466)  
5  
6  
7

8 3 1 or 2 (26466)  
9

10  
11  
12 4 exp "side effects (drug)"/ (57604)  
13  
14

15 5 (safe or safety).ti,ab. (84148)  
16  
17

18  
19 6 side effect\$.ti,ab. (31950)  
20  
21

22  
23 7 ((adverse or undesirable or harms\$ or serious or toxic) adj3 (effect\$ or reaction\$ or event\$ or  
24 outcome\$)).ti,ab. (44183)  
25  
26

27  
28 8 toxic disorders/ (1433)  
29  
30

31 9 exp "substance use disorder"/ (127742)  
32  
33

34  
35 10 (toxicity or complication\$ or noxious or tolerability).ti,ab. (42844)  
36  
37

38  
39 11 or/4-10 (310848)  
40  
41

42  
43 12 3 and 11 (10984)  
44  
45

46  
47 13 epidemiology/ (49562)  
48  
49

50  
51 14 ((case\* adj5 control\*) or (case adj3 comparison\*) or case-comparison or control group\*).ti,ab,id.  
52 not "Literature Review".md. (95810)  
53  
54  
55  
56  
57  
58  
59  
60

- 1  
2  
3 15 ((cohort or longitudinal or prospective or retrospective).ti,ab,id. or longitudinal study.md. or  
4 prospective study.md. or retrospective study.md.) not "Literature Review".md. (286455)  
5  
6  
7  
8 16 (cross section\* or "prevalence study").ti,ab,id. (80384)  
9  
10  
11  
12 17 clinical trials/ or "treatment outcome clinical trial".md. or ((randomi?ed adj7 trial\*) or ((single or  
13 doubl\* or tripl\* or treb\*) and (blind\* or mask\*)) or (controlled adj3 trial\*) or (clinical adj2  
14 trial\*)).ti,ab,id. (101001)  
15  
16  
17  
18 18 Case control.mp. (10736)  
19  
20  
21  
22 19 (cohort adj (study or studies)).mp. [mp=title, abstract, heading word, table of contents, key  
23 concepts, original title, tests & measures, mesh] (21026)  
24  
25  
26  
27 20 Cohort analy\$.mp. (2099)  
28  
29  
30  
31 21 (Follow up adj (study or studies)).mp. [mp=title, abstract, heading word, table of contents, key  
32 concepts, original title, tests & measures, mesh] (12876)  
33  
34  
35  
36 22 (Longitudinal or Retrospective or Cross sectional).mp. [mp=title, abstract, heading word, table of  
37 contents, key concepts, original title, tests & measures, mesh] (218589)  
38  
39  
40  
41 23 or/13-22 (561443)  
42  
43  
44 24 12 and 23 (3801)  
45  
46  
47  
48  
49  
50  
51  
52  
53  
54  
55  
56  
57  
58  
59  
60

## **Appendix 2: Detailed methods for the assessment of risk of bias**

We rated studies at serious risk of confounding bias when they when they did not adjust for important predictors of adverse events and cannabis use, including, at minimum, pain intensity, concomitant pain medication, disability status, alcohol use, past cannabis use and at critical risk if they did not include a control group. We rated studies at serious risk of selection bias when studies included prevalent medical cannabis users (i.e., patients who experience serious or debilitating adverse events are more likely to discontinue cannabis and hence less likely to be included in studies of prevalent users). We rated studies at serious risk of misclassification of the intervention if there was evidence that medical cannabis users were not appropriately classified. We rated studies at serious risk of bias due to departure from the intended intervention if the intervention was not delivered as intended or more than 20% of patients discontinued the intervention for reasons unrelated to adverse effects (e.g., costs). We rated studies at serious risk of missing data when 20% or more of the original patients did not have adverse event data. Finally, we rated studies at moderate risk of selective reporting when the study did not differentiate between minor and serious adverse events or when there were indications that adverse events were selectively, and not comprehensively, reported.

### **Appendix 3: List of included studies**

1. Anderson SP, Zylla DM, McGriff DM, Arneson TJ. Impact of medical cannabis on patient-reported symptoms for patients with cancer enrolled in Minnesota's medical cannabis program. *Journal of Oncology Practice*. 2019;15(6):E338-E45.
2. Bellnier T, Brown GW, Ortega TR. Preliminary evaluation of the efficacy, safety, and costs associated with the treatment of chronic pain with medical cannabis. *The Mental Health Clinician*. 2018;8(3):110-5.
3. Bestard JA, Toth CC. An open-label comparison of nabilone and gabapentin as adjuvant therapy or monotherapy in the management of neuropathic pain in patients with peripheral neuropathy. *Pain Practice*. 2011;11(4):353-68.
4. Bonar EE, Cranford JA, Arterberry BJ, Walton MA, Bohnert KM, Ilgen MA. Driving under the influence of cannabis among medical cannabis patients with chronic pain. *Drug & Alcohol Dependence*. 2019;195:193-7.
5. Cervigni M, Nasta L, Schievano C, Lampropoulou N, Ostardo E. Micronized Palmitoylethanolamide-Polydatin Reduces the Painful Symptomatology in Patients with Interstitial Cystitis/Bladder Pain Syndrome. *BioMed Research International*. 2019;2019 (no pagination)(9828397).
6. Chirchiglia D, Chirchiglia P, Signorelli F. Nonsurgical lumbar radiculopathies treated with ultramicronized palmitoylethanolamide (umPEA): A series of 100 cases. *Neurologia i Neurochirurgia Polska*. 2018;52(1):44-7.
7. Cranford JA, Arnedt JT, Conroy DA, Bohnert KM, Bourque C, Blow FC, et al. Prevalence and correlates of sleep-related problems in adults receiving medical cannabis for chronic pain. *Drug & Alcohol Dependence*. 2017;180:227-33.
8. Cremer-Schaeffer P, Schmidt-Wolf G, Broich K. [Cannabis medicines in pain management : Interim analysis of the survey accompanying the prescription of cannabis-based medicines in Germany with regard to pain as primarily treated symptom]. *Der Schmerz*. 2019;33(5):415-23.
9. Crowley K, de Vries ST, Moreno-Sanz G. Self-Reported Effectiveness and Safety of Trokie R Lozenges: A Standardized Formulation for the Buccal Delivery of Cannabis Extracts. *Frontiers in Neuroscience*. 2018;12:564.
10. Del Giorno R, Skaper S, Paladini A, Varrassi G, Coaccioli S. Palmitoylethanolamide in Fibromyalgia: Results from Prospective and Retrospective Observational Studies. *Pain and Therapy*. 2015;4(2):169-78.
11. Domínguez CM, Martín AD, Ferrer FG, Puertas MI, Muro AL, González JM, et al. N-palmitoylethanolamide in the treatment of neuropathic pain associated with lumbosciatica. *Pain Manag*. 2012;2(2):119-24.
12. Fanelli G, De Carolis G, Leonardi C, Longobardi A, Sarli E, Allegri M, et al. Cannabis and intractable chronic pain: an explorative retrospective analysis of Italian cohort of 614 patients. *Journal of pain research*. 2017;10:1217-24.

13. Feingold D, Goor-Aryeh I, Bril S, Delayahu Y, Lev-Ran S. Problematic Use of Prescription Opioids and Medicinal Cannabis Among Patients Suffering from Chronic Pain. *Pain Medicine*. 2017;18(2):294-306.
14. Fiz J, Duran M, Capella D, Carbonell J, Farre M. Cannabis use in patients with Fibromyalgia: Effect on symptoms relief and health-related quality of life. *PLoS ONE*. 2011;6 (4) (no pagination)(e18440).
15. Gatti A, Lazzari M, Gianfelice V, Di Paolo A, Sabato E, Sabato AF. Palmitoylethanolamide in the treatment of chronic pain caused by different etiopathogenesis. *Pain Medicine*. 2012;13(9):1121-30.
16. Giorgi V, Bongiovanni S, Atzeni F, Marotto D, Salaffi F, Sarzi-Puttini P. Adding medical cannabis to standard analgesic treatment for fibromyalgia: a prospective observational study. *Clinical & Experimental Rheumatology*. 2020;38 Suppl 123(1):53-9.
17. Habib G, Artul S. Medical Cannabis for the Treatment of Fibromyalgia. *JCR: Journal of Clinical Rheumatology*. 2018;24(5):255-8.
18. Haroutounian S, Ratz Y, Ginosar Y, Furmanov K, Saifi F, Meidan R, et al. The Effect of Medicinal Cannabis on Pain and Quality-of-Life Outcomes in Chronic Pain: A Prospective Open-label Study. *Clinical Journal of Pain*. 2016;32(12):1036-43.
19. Hoggart B, Ratcliffe S, Ehler E, Simpson KH, Hovorka J, Lejcko J, et al. A multicentre, open-label, follow-on study to assess the long-term maintenance of effect, tolerance and safety of THC/CBD oromucosal spray in the management of neuropathic pain. *Journal of Neurology*. 2015;262(1):27-40.
20. Lejczak S, Rousselot H, Di Patrizio P, Debouverie M. Dronabinol use in France between 2004 and 2017. *Revue Neurologique*. 2019;175(5):298-304.
21. Loi ES, Pontis A, Cofelice V, Pirarba S, Fais MF, Daniilidis A, et al. Effect of ultramicro-nized-palmitoylethanolamide and co-micro-nized-palmitoylethanolamide/polydatin on chronic pelvic pain and quality of life in endometriosis patients: An open-label pilot study. *International Journal of Women's Health*. 2019;11:443-9.
22. Lynch ME, Young J, Clark AJ. A case series of patients using medicinal marijuana for management of chronic pain under the Canadian Marijuana Medical Access Regulations. *Journal of Pain & Symptom Management*. 2006;32(5):497-501.
23. Naftali T, Bar-Lev Schleider L, Sklerovsky Benjaminov F, Lish I, Konikoff FM, Ringel Y. Medical cannabis for inflammatory bowel disease: real-life experience of mode of consumption and assessment of side-effects. *European Journal of Gastroenterology & Hepatology*. 2019;31(11):1376-81.
24. Paladini A, Varrassi G, Bentivegna G, Carletti S, Piroli A, Coaccioli S. Palmitoylethanolamide in the Treatment of Failed Back Surgery Syndrome. *Pain Res Treat*. 2017;2017:1486010.
25. Passavanti MB, Fiore M, Sansone P, Aurilio C, Pota V, Barbarisi M, et al. The beneficial use of ultramicro-nized palmitoylethanolamide as add-on therapy to Tapentadol in the treatment of low back pain: a pilot study comparing prospective and retrospective observational arms. *BMC Anesthesiology*. 2017;17(1):171.

- 1  
2  
3 26. Perron BE, Holt KR, Yeagley E, Ilgen M. Mental health functioning and severity of cannabis  
4 withdrawal among medical cannabis users with chronic pain. *Drug & Alcohol Dependence*.  
5 2019;194:401-9.  
6
- 7 27. Rog DJ, Nurmikko TJ, Young CA. Oromucosal delta9-tetrahydrocannabinol/cannabidiol for  
8 neuropathic pain associated with multiple sclerosis: an uncontrolled, open-label, 2-year extension trial.  
9 *Clinical Therapeutics*. 2007;29(9):2068-79.  
10
- 11 28. Sagy I, Bar-Lev Schleider L, Abu-Shakra M, Novack V. Safety and Efficacy of Medical Cannabis in  
12 Fibromyalgia. *Journal of Clinical Medicine*. 2019;8(6):05.  
13
- 14 29. Schifilliti C, Cucinotta L, Fedele V, Ingegnosi C, Luca S, Leotta C. Micronized  
15 palmitoylethanolamide reduces the symptoms of neuropathic pain in diabetic patients. *Pain Res Treat*.  
16 2014;2014:849623.  
17
- 18 30. Schimrigk S, Marziniak M, Neubauer C, Kugler EM, Werner G, Abramov-Sommariva D.  
19 Dronabinol Is a Safe Long-Term Treatment Option for Neuropathic Pain Patients. *European Neurology*.  
20 2017;78(5-6):320-9.  
21
- 22 31. Sinclair J, Smith CA, Abbott J, Chalmers KJ, Pate DW, Armour M. Cannabis Use, a Self-  
23 Management Strategy Among Australian Women With Endometriosis: Results From a National Online  
24 Survey. *Journal of Obstetrics & Gynaecology Canada: JOGC*. 2020;42(3):256-61.  
25
- 26 32. Storr M, Devlin S, Kaplan GG, Panaccione R, Andrews CN. Cannabis use provides symptom relief  
27 in patients with inflammatory bowel disease but is associated with worse disease prognosis in patients  
28 with Crohn's disease. *Inflammatory Bowel Diseases*. 2014;20(3):472-80.  
29
- 30 33. Toth C, Mawani S, Brady S, Chan C, Liu C, Mehina E, et al. An enriched-enrolment, randomized  
31 withdrawal, flexible-dose, double-blind, placebo-controlled, parallel assignment efficacy study of  
32 nabilone as adjuvant in the treatment of diabetic peripheral neuropathic pain. *Pain*. 2012;153(10):2073-  
33 82.  
34
- 35 34. Ueberall MA, Essner U, Mueller-Schwefe GHH. Effectiveness and tolerability of THC:CBD  
36 oromucosal spray as add-on measure in patients with severe chronic pain: Analysis of 12-week open-  
37 label real-world data provided by the German pain e-registry. *Journal of Pain Research*. 2019;12:1577-  
38 604.  
39
- 40 35. Vigil JM, Stith SS, Adams IM, Reeve AP. Associations between medical cannabis and prescription  
41 opioid use in chronic pain patients: A preliminary cohort study. *PLoS ONE [Electronic Resource]*.  
42 2017;12(11):e0187795.  
43
- 44 36. Ware MA, Doyle CR, Woods R, Lynch ME, Clark AJ. Cannabis use for chronic non-cancer pain:  
45 results of a prospective survey. *Pain*. 2003;102(1-2):211-6.  
46
- 47 37. Ware MA, Wang T, Shapiro S, Collet JP, team Cs. Cannabis for the Management of Pain:  
48 Assessment of Safety Study (COMPASS). *Journal of Pain*. 2015;16(12):1233-42.  
49
- 50 38. Weber J, Schley M, Casutt M, Gerber H, Schuepfer G, Rukwied R, et al. Tetrahydrocannabinol  
51 (Delta 9-THC) treatment in chronic central neuropathic pain and fibromyalgia patients: Results of a  
52 multicenter survey. *Anesthesiology Research and Practice*. 2009;2009 (no pagination)(827290).  
53  
54  
55  
56  
57  
58  
59



1  
2  
3 39. Yassin M, Oron A, Robinson D. Effect of adding medical cannabis to analgesic treatment in  
4 patients with low back pain related to fibromyalgia: an observational cross-over single centre study.  
5 Clinical & Experimental Rheumatology. 2019;37 Suppl 116(1):13-20.  
6  
7  
8  
9  
10  
11  
12  
13  
14  
15  
16  
17  
18  
19  
20  
21  
22  
23  
24  
25  
26  
27  
28  
29  
30  
31  
32  
33  
34  
35  
36  
37  
38  
39  
40  
41  
42  
43  
44  
45  
46  
47  
48  
49  
50  
51  
52  
53  
54  
55  
56  
57  
58  
59  
60

For peer review only

## **Appendix 4: Studies excluded at the full-text screening stage**

### **Not a full-text report of a non-randomized study**

1. Apro MS. Prevention of chemotherapy-induced nausea and vomiting in patients with cancer. *Arizona Medicine*. 1981;38(11):843-5.
2. Abrams DI, Guzman M. Cannabis in cancer care. *Clinical Pharmacology & Therapeutics*. 2015;97(6):575-86.
3. Actrn. Cannabis-Based Medicine (Sativex) in the Treatment of Pain in Kidney Failure. <http://www.who.int/trialssearch/Trial2.aspx?TrialID=ACTRN12610000783022>. 2010.
4. Actrn. The CANBACK trial, to determine the efficacy of oral cannabidiol, when compared to placebo, as an adjunct for the treatment of acute non-traumatic low back pain. <http://www.who.int/trialssearch/Trial2.aspx?TrialID=ACTRN12618000487213>. 2018.
5. Adhiyaman V, Arshad S. Cannabis for intractable nausea after bilateral cerebellar stroke. *Journal of the American Geriatrics Society*. 2014;62(6):1199.
6. Ahmed A, van der Marck MA, van den Elsen G, Olde Rikkert M. Cannabinoids in late-onset Alzheimer's disease. *Clinical Pharmacology & Therapeutics*. 2015;97(6):597-606.
7. Ahmed AI, van den Elsen GA, van der Marck MA, Olde Rikkert MG. Cannabinoids for pain in dementia: the good, the bad, and the ugly. *Journal of the American Geriatrics Society*. 2014;62(5):1001-2.
8. Anonymous. Latest trial suggests cannabis does not relieve spasticity of multiple sclerosis. *Pharmaceutical Journal*. 2002;268(7198):675.
9. Anonymous. Cannabis derivatives and pain. A small role for delta9-tetrahydrocannabinol (THC) in some forms of multiple sclerosis. *Prescribe International*. 2009;18(103):226.
10. Anonymous. Association between cannabis use and complications related to ulcerative colitis in hospitalized patients: A propensity matched retrospective cohort study: Erratum. *Medicine*. 2019;98(35):e17046.
11. Arboleda MF, Dam V, Prosk E, Dworkind M, Vigano A. Cannabis-Based Medications: The Future Co-analgesics of Choice for Cancer Patients? *Journal of Pain and Symptom Management*. 2018;56(6):e68.
12. Arboleda MF, Dam V, Prosk E, Dworkind M, Vigano A. Transforming symptom management in cancer patients: Is medical cannabis a new paradigm? *Supportive Care in Cancer*. 2018;26 (2 Supplement 1):S53.
13. Ashton CH. Adverse effects of cannabis and cannabinoids. *British Journal of Anaesthesia*. 1999;83(4):637-49.

14. Ballas SK. Use of marijuana in patients with sickle cell disease increased the frequency of hospitalization for acute painful vaso-occlusive crises. Blood Conference: 58th Annual Meeting of the American Society of Hematology, ASH. 2016;128(22).
15. Bergamaschi V, Konrad G, Battaglia MA, Brichetto G. Efficacy and discontinuation of nabiximols in patients with multiple sclerosis: A real-life study. Multiple Sclerosis Journal. 2018;24 (2 Supplement):959.
16. Bertsche T, Schulz M. Cannabis can relieve spasticity associated with multiple sclerosis. [German]. Pharmazeutische Zeitung. 2003;148(8):32-3.
17. Bialas P, Drescher B, Gottschling S, Juckenhofel S, Konietzke D, Kuntz W, et al. [Cannabis-based medicines for chronic pain: indications, selection of drugs, effectiveness and safety : Experiences of pain physicians in Saarland]. Der Schmerz. 2019;33(5):399-406.
18. Blondin N. The evolving role of complementary cannabis therapy in glioblastoma treatment. Neuro-Oncology. 2018;20 (Supplement 6):vi214-vi5.
19. Bronstein K, Dhaliwal J, Leider H. Rates of inappropriate drug use in the chronic pain population: An update. Journal of Pain. 2011;1):P5.
20. Brusberg M, Kang D, Larsson H, Lindstrom E, Martinez V. Inhibition of fatty acid amide hydrolase (FAAH) activity enhances the analgesic action of the endocannabinoid anandamide on visceral pain. Gastroenterology. 2009;1):A141.
21. Bulbul A, Mino EA, Khorsand-Sahbaie M, Lentkowski L. Opioid dose reduction and pain control with medical cannabis. Journal of Clinical Oncology Conference. 2018;36(34 Supplement).
22. Caulley L, Caplan B, Ross E. Medical Marijuana for Chronic Pain. New England Journal of Medicine. 2018;379(16):1575-7.
23. Clements-Nolle K, Lensch T, Larson S, Yang W. Prevalence and correlates of any and frequent synthetic cannabinoid use in a representative sample of high school students. Substance Use & Misuse. 2016;51(9):1139-46.
24. Costales B, Van Boemmel-Wegmann S, Segal R. A descriptive analysis of Florida medical marijuana registry patients from 2016-2017. Pharmacoepidemiology and Drug Safety. 2019;28 (Supplement 2):268.
25. Cuestas E. [Cannabis for chronic neuropathic pain.]. Revista de la Facultad de Ciencias Medicas de Cordoba. 2019;76(1):1-2.
26. De Trane S, Buchanan K, Keenan L, Valentine C, Liddicut M, Stevenson V, et al. Nabiximols has a beneficial effect on self report of MS related spasticity. Multiple Sclerosis. 2016;22 (Supplement 3):684.
27. De Trane S, Buchanan K, Keenan L, Valentine C, Liddicut M, Stevenson V, et al. Thc:cbd (nabiximols) has a beneficial effect on multiple sclerosis (MS) related spasticity and delays or negates the need for intrathecal baclofen pump implantation. Neurology Conference: 69th American Academy of Neurology Annual Meeting, AAN. 2017;88(16 Supplement 1).

- 1
- 2
- 3 28. Degenhardt L, Hall WD. The adverse effects of cannabinoids: implications for use of medical
- 4 marijuana. *CMAJ Canadian Medical Association Journal*. 2008;178(13):1685-6.
- 5
- 6 29. Di Francesco A, Pizzigallo D. Use of micronized palmitoylethanolamide and trans-polydatin in
- 7 chronic pelvic pain associated with endometriosis. An open-label study. *Giornale Italiano di Ostetricia e*
- 8 *Ginecologia*. 2014;36(2):353-8.
- 9
- 10 30. Dimou T, Spanomanoli A, Michelis S. The use of palmitoylethanolamide (PEA) in FBSS for chronic
- 11 pain management. *Regional Anesthesia and Pain Medicine*. 2019;44 (10 Supplement 1):A168.
- 12
- 13 31. Donato F, Turri M, Zanette G, Tugnoli V, Deotto L, Teatini F, et al. A study of cortical and spinal
- 14 excitability in patients affected by multiple sclerosis and spasticity after oromucosal cannabinoid spray
- 15 (THC/CBD). *Clinical Neurophysiology*. 2016;127 (4):e147.
- 16
- 17 32. Donovan KA. Age-related differences in cannabis use by cancer patients referred for supportive
- 18 care. Diane Portman. *Journal of Clinical Oncology Conference*. 2019;37(31 Supplement 1).
- 19
- 20 33. Dow GJ, Meyers FH, Stanton W, Devine ML. Serious reactions to oral delta-9-
- 21 tetrahydrocannabinol in cancer chemotherapy patients. *Clinical Pharmacy*. 1984;3(1):14.
- 22
- 23 34. Dusi V, Attili SVS, Singaraju M. Observational study on role of crude cannabis in pain control and
- 24 quality of life in terminally ill cancer patients: An Indian perspective. *Annals of Oncology*. 2019;30
- 25 (Supplement 9):ix119.
- 26
- 27 35. Eltayb A, Etges T, Wright S. An observational post-approval registry study of patients prescribed
- 28 Sativex. Results from clinical practice. *Multiple Sclerosis*. 2013;1):480.
- 29
- 30 36. Erbe B. [Cannabis - medicinal use]. *Deutsche Medizinische Wochenschrift*. 2014;139(3):74-5.
- 31
- 32 37. Eucr AT. SATIVEX® AS ADD-ON THERAPY VS. FURTHER OPTIMIZED FIRST-LINE ANTISPASTICS.
- 33 <http://www.who.int/trialsearch/Trial2.aspx?TrialID=EUCTR2015-004451-40-AT>. 2016.
- 34
- 35 38. Eucr BE. An investigational study to assess the effect of GS-5745 on adult patients with Cystic
- 36 Fibrosis. <http://www.who.int/trialsearch/Trial2.aspx?TrialID=EUCTR2015-002192-23-BE>. 2016.
- 37
- 38 39. Eucr DE. A cannabis preparation for neuropathic pain.
- 39 <http://www.who.int/trialsearch/Trial2.aspx?TrialID=EUCTR2014-005344-17-DE>. 2015.
- 40
- 41 40. Eucr DK. Effect of Sativex on pain and spasticity following spinal cord injury.
- 42 <http://www.who.int/trialsearch/Trial2.aspx?TrialID=EUCTR2012-005328-14-DK>. 2013.
- 43
- 44 41. Eucr DK. The effect of cannabis products on nerve pain and muscle stiffness in patients with
- 45 multiple sclerosis and in patients with spinal cord injury.
- 46 <http://www.who.int/trialsearch/Trial2.aspx?TrialID=EUCTR2018-002315-98-DK>. 2018.
- 47
- 48 42. Eucr GB. Study of Sativex for the Treatment of Cancer Related Pain.
- 49 <http://www.who.int/trialsearch/Trial2.aspx?TrialID=EUCTR2009-016065-29-GB>. 2010.
- 50
- 51 43. Eucr IT. CLINICAL STUDY TO EVALUATE THE EFFECTIVENESS OF Sativex in relieving pain PEOPLE
- 52 AFFECTED BY MULTIPLE SCLEROSIS. [http://www.who.int/trialsearch/Trial2.aspx?TrialID=EUCTR2011-](http://www.who.int/trialsearch/Trial2.aspx?TrialID=EUCTR2011-002258-30-IT)
- 53 [002258-30-IT](http://www.who.int/trialsearch/Trial2.aspx?TrialID=EUCTR2011-002258-30-IT). 2012.
- 54
- 55
- 56
- 57
- 58
- 59
- 60

- 1  
2  
3 44. Euctr NL. ?9-THC (Namisol®) in persistent postsurgical pain.  
4 <http://www.who.int/trialsearch/Trial2.aspx?TrialID=EUCTR2012-000812-27-NL>. 2012.  
5
- 6 45. Euctr NL. Perioperative ?9-THC for postsurgical pain.  
7 <http://www.who.int/trialsearch/Trial2.aspx?TrialID=EUCTR2012-005808-17-NL>. 2013.  
8
- 9 46. Euctr NL. Interaction between opioids and cannabinoids in the treatment of fibromyalgia pain.  
10 <http://www.who.int/trialsearch/Trial2.aspx?TrialID=EUCTR2019-001861-33-NL>. 2019.  
11
- 12 47. Fernandez O. Advances in the management of multiple sclerosis spasticity: Recent clinical trials.  
13 *European Neurology*. 2014;72:9-11.  
14
- 15 48. Ferrante F, Polito G, Ferraro M. DELTA-9-tetrahydrocannabinol (Sativex) for the treatment of  
16 multiple sclerosis spasticity: Evaluation of effectiveness and safety. *European Journal of Hospital*  
17 *Pharmacy*. 2019;26 (Supplement 1):A239.  
18
- 19 49. Ferre L, Nuara A, Pavan G, Radaelli M, Moiola L, Rodegher M, et al. Medium and long term  
20 efficacy of nabiximols for the treatment of multiple sclerosis related spasticity: An Italian monocentric  
21 study. *Multiple Sclerosis*. 2015;1):728-9.  
22
- 23 50. Ferre L, Pavan G, Nuara A, Radaelli M, Liberatore G, Guaschino C, et al. Efficacy, safety and  
24 response rate to Nabiximol for the treatment of MS-related spasticity in an Italian monocentric cohort.  
25 *Multiple Sclerosis*. 2015;21 (4):501-2.  
26
- 27 51. Ferre L, Sorosina M, Santoro S, Moiola L, Rodegher M, Colombo B, et al. Efficacy, safety and  
28 response rate of nabiximols assessed in an Italian monocentric cohort. *Multiple Sclerosis*. 2014;1):469-  
29 70.  
30
- 31 52. Fitzcharles MA, McDougall J, Ste-Marie PA, Padjen I. Clinical implications for cannabinoid use in  
32 the rheumatic diseases: potential for help or harm? *Arthritis & Rheumatism*. 2012;64(8):2417-25.  
33
- 34 53. Flachenecker P, Zettl U, Henze T. THC:CBD oromucosal spray (nabiximols) in the long term  
35 treatment of multiple sclerosis spasticity. The MOVE 2 long-term study. *Multiple Sclerosis*. 2013;1):527.  
36
- 37 54. Flank J, Lavoratore S, Vol H, Taylor T, Zelunka E, Nathan P, et al. Chemotherapy-induced nausea  
38 and vomiting in children receiving high dose methotrexate with or without vincristine: Preliminary  
39 results. *Canadian Journal of Hospital Pharmacy*. 2014;67 (1):61.  
40
- 41 55. Freidel M, Tiel-Wilck K, Schreiber H, Lang M. Resistant multiple sclerosis spasticity (MSS)  
42 treatment with THC:CBD spray and effects on driving ability. *Multiple Sclerosis*. 2013;1):522-3.  
43
- 44 56. Friedman D, Devinsky O. Cannabinoids in the Treatment of Epilepsy. *New England Journal of*  
45 *Medicine*. 2015;373(11):1048-58.  
46
- 47 57. Funke A, Spittel S, Kettemann D, Maier A, Munch C, Meyer T. Delta-9-Tetrahydrocannabinol-  
48 cannabidiol (THC/CBD) oromucosal spray for the treatment of spasticity in ALS - Assessment of patient  
49 reported outcomes. *Clinical Neurophysiology*. 2018;129 (8):e83.  
50
- 51 58. Gallo E, Maggini V, Comite M, Sofi F, Baccetti S, Vannacci A, et al. SENeCA Study: Observational  
52 study on the effect of medicinal cannabis on quality of life and nutritional outcomes. *BMC*  
53  
54  
55  
56  
57  
58  
59

1  
2  
3 Complementary and Alternative Medicine Conference: World Congress Integrative Medicine and Health.  
4 2017;17(Supplement 1).  
5

6 59. Galvin D, Mulkerrin O. Cannabis-based medications: A comparison of patients' knowledge and  
7 awareness in pain, neurology and prescription out-patient settings. *Pain Practice*. 2018;18 (Supplement  
8 1):60.  
9

10 60. Gamaoun R, Kasvis P, Patronidis F, Arboleda MF, Vigano A. Potential impact of medical cannabis  
11 treatment on pain control among cancer patients in Quebec-Canada: A pilot study. *Supportive Care in*  
12 *Cancer*. 2019;27 (1 Supplement):S54-S5.  
13

14 61. Gaston T, Szaflarski M, Hansen B, Grayson L, Bebin EM, Szaflarski J. Improvement in quality of  
15 life ratings after one year of treatment with pharmaceutical formulation of cannabidiol (CBD). *Epilepsia*.  
16 2017;58 (Supplement 5):S159.  
17

18 62. Gauter B, Rukwied R, Konrad C. [Use and effectiveness of dronabinol (delta9-  
19 tetrahydrocannabinol) in chronic pain]. *Der Schmerz*. 2004;18 Suppl 2:S11-4.  
20

21 63. Gerardi MC, Batticciotto A, Talotta R, Ditto MC, Atzeni F, Sarzi-Puttini P. Efficacy of cannabis flos  
22 in patients with fibromyalgia: A monocentric observational study. *Arthritis and Rheumatology*. 2016;68  
23 (Supplement 10):72-4.  
24

25 64. Gilmore D, Hooper C, Nemastil CJ, Dell ML, McCoy K, Kirkby SE. Effects of self-reported  
26 marijuana use on adherence and mental health disease in cystic fibrosis. *Pediatric Pulmonology*. 2018;53  
27 (Supplement 2):424.  
28

29 65. Gubbiotti M, Illiano E, Costantini E, Giannantoni A. Palmitoylethanolamide/polydatin as add-on  
30 therapy in pain resistant patients with interstitial cystitis/bladder painful syndrome. *European Urology,*  
31 *Supplements*. 2019;18 (1):e1970.  
32

33 66. Guerrero LJ, Maclas IC, Del Castillo SSF, Izquierdo MM, Rengifo CD, Nunez MN. Effectiveness and  
34 safety of d-9-tetrahydrocannabinol (sativex) in patients with multiple sclerosis spasticity. *European*  
35 *Journal of Hospital Pharmacy*. 2017;24 (Supplement 1):A113.  
36

37 67. Guindon J. Nabilone in inflammatory pain: to be or not to be. *Clinical & Experimental*  
38 *Pharmacology & Physiology*. 2012;39(4):327-8.  
39

40 68. Gurevich T, Bar Lev Chleider L, Rosenberg A, Knaani J, Baruch Y, Djaldetti R. Effect of medical  
41 cannabis in Parkinson's disease: Survey of patient experiences. *Movement Disorders*. 2015;1):S88-S9.  
42

43 69. Gutierrez T, Hohmann AG. Cannabinoids for the treatment of neuropathic pain: Are they safe  
44 and effective? *Future Neurology*. 2011;6(2):129-33.  
45

46 70. Guttenthaler V, Wittmann M. Replacement of benzodiazepines by cannabinoids for the  
47 preoperative medication-a feasibility trial (Beach-Trial). *Medical Cannabis and Cannabinoids*. 2019;2  
48 (2):78.  
49

50 71. Gyang T, Hyland M, Samkoff L, Goodman A. "Real world" experience of medical marijuana in  
51 symptomatic management of multiple sclerosis and transverse myelitis. *Neurology Conference: 70th*  
52 *Annual Meeting of the American Academy of Neurology, AAN*. 2018;90(15 Supplement 1).  
53  
54  
55  
56  
57

- 1  
2  
3 72. Hansra D, Granada H. Evaluation of safety, efficacy, and clinical endpoints of delta-9-  
4 tetrahydrocannabinol in patients age 60 or older with hematologic and oncologic malignancies. Blood  
5 Conference: 59th Annual Meeting of the American Society of Hematology, ASH. 2017;130(Supplement  
6 1).  
7  
8  
9 73. Hansra DM. Evaluation of safety, efficacy, and other clinical endpoints of delta-9-  
10 tetrahydrocannabinol in older patients with hem/onc malignancies. Journal of Clinical Oncology  
11 Conference. 2017;35(15 Supplement 1).  
12  
13 74. Haupts M, Jonas A, Witte K, Alvarez-Ossorio L. Influence of optimized anti-spastic pre-treatment  
14 on the efficacy and tolerability of THC: CBD oromucosal spray in multiple sclerosis spasticity patients. A  
15 post-hoc RCT data analyses. Multiple Sclerosis. 2015;1):708-9.  
16  
17 75. Hicks K, Snyder C. Impact of high-dose cannabis use in patients with advanced pancreatic cancer  
18 undergoing treatment in a phase i clinical trial: Lessons learned and impact on future clinical research  
19 design. Journal of Oncology Pharmacy Practice. 2018;24 (2 Supplement 1):8.  
20  
21 76. Higgins P, Ginsburg D, Gilder K, Walsh B, English B, Turner S, et al. Safety and efficacy of  
22 olorinab, a peripherally restricted, highly-selective, cannabinoid receptor 2 agonist in a phase 2A study  
23 in chronic abdominal pain associated with Crohn's disease. Journal of Crohn's and Colitis. 2019;13  
24 (Supplement 1):S318.  
25  
26  
27 77. Hill KP, Hurley-Welljams-Dorof WM. Low to moderate quality evidence demonstrates the  
28 potential benefits and adverse events of cannabinoids for certain medical indications. Evidence Based  
29 Medicine. 2016;21(1):17.  
30  
31 78. Hobart JC, Zajicek JP. Cannabis as a symptomatic treatment for MS: Clinically meaningful MUSEC  
32 to the stiffness and walking problems of people with MS. Multiple Sclerosis. 2012;1):247.  
33  
34 79. Hoffenberg E, Murphy B, Mikulich-Gilbertson S, McWilliams S, Hoffenberg A, Hopfer C. Why and  
35 how adolescents and young adults with inflammatory bowel disease use cannabis. Journal of Pediatric  
36 Gastroenterology and Nutrition. 2017;65 (Supplement 2):S147-S8.  
37  
38 80. Honarmand K, Tierney MC, O'Connor P, Feinstein A. Effects of cannabis on cognitive function in  
39 patients with multiple sclerosis. Neurology. 2011;76(13):1153-60.  
40  
41 81. Huestis MA, Elsohly M, Nebro W, Barnes A, Gustafson RA, Smith ML. Estimating time of last oral  
42 ingestion of cannabis from plasma THC and THCCOOH concentrations. Therapeutic Drug Monitoring.  
43 2006;28(4):540-4.  
44  
45 82. Hulgán T, Kingsley P, Koethe J, Sterling T, Patel S. Associations between circulating  
46 endocannabinoids and cardio-metabolic factors in HIV-infected persons on antiretroviral therapy: A pilot  
47 study. Antiviral Therapy. 2014;2):A8.  
48  
49 83. Irving P, Iqbal T, Nwokolo C, Subramanian S, Bloom S, Prasad N, et al. Trial to assess cannabidiol  
50 in the symptomatic treatment of ulcerative colitis. Gut. 2015;1):A430.  
51  
52 84. Isrctn. A one year open label assessment of the use of nabilone in the treatment of chronic  
53 neuropathic pain. <http://www.who.int/trialsearch/Trial2.aspx?TrialID=ISRCTN38408594>. 2007.  
54  
55  
56  
57  
58  
59  
60

- 1  
2  
3 85. Jamal N, Korman J, Musing M, Malavade A, Coleman BL, Siddiqui N, et al. The effect of  
4 preoperative cannabis use on opioid consumption following surgery: A cohort analysis. *Canadian Journal*  
5 *of Hospital Pharmacy*. 2018;71 (1):73.  
6
- 7 86. Kalu N, O'Neal PA, Nwokolo C, Diaz S, Owoyemi O. The use of marijuana and hydroxyurea  
8 among sickle cell patients. *Blood Conference: 58th Annual Meeting of the American Society of*  
9 *Hematology, ASH*. 2016;128(22).  
10
- 11 87. Kanaan AS, Muller-Vahl KR. Cannabinoid-based medicines for the treatment of Gilles de la  
12 Tourette syndrome. *Handbook of cannabis and related pathologies: Biology, pharmacology, diagnosis,*  
13 *and treatment*. San Diego, CA: Elsevier Academic Press; US; 2017. p. 883-92.  
14
- 15 88. Keating GM. Delta-9-Tetrahydrocannabinol/Cannabidiol Oromucosal Spray (Sativex R): A Review  
16 in Multiple Sclerosis-Related Spasticity. *Drugs*. 2017;77(5):563-74.  
17
- 18 89. Khalid L, Starrels JL, Sohler N, Arnsten JH, Jost J, Cunningham C. Marijuana use is associated with  
19 low prescription opioid analgesic (POA) use among hiv-infected patients with chronic pain. *Journal of*  
20 *General Internal Medicine*. 2016;1):S297.  
21
- 22 90. Kiszko K, Patel K, Chudasama B, Samodulski J, Nienaber C, Martins-Welch D, et al. Older adults'  
23 perspectives on medical marijuana (MM) use. *Journal of the American Geriatrics Society*. 2017;65  
24 (Supplement 1):S70.  
25
- 26 91. Klooker T, Liefeld K, Van Den Wijngaard RM, Boeckstaens GE. The cannabinoid receptor  
27 agonist delta-9-tetrahydrocannabinol increases rectal sensitivity in IBS patients and healthy volunteers.  
28 *Gastroenterology*. 2009;1):A726-A7.  
29
- 30 92. Koehler J, Feneberg W, Gorodetzky H, Meier M, Pollmann W. Clinical experiences with on-label  
31 nabiximols therapy in multiple sclerosis-induced spasticity. *Multiple Sclerosis*. 2013;1):281-2.  
32
- 33 93. Koehler J, Gorodetzky H, Pollmann W, Meier M, Feneberg W. Monotherapy with nabiximols in  
34 multiple sclerosis-induced spasticity. *Multiple Sclerosis*. 2013;1):282.  
35
- 36 94. Laux L, Devinsky O, Miller I, Nabbout R, Zolnowska M, Wright S, et al. Maintenance of long-term  
37 safety and efficacy of cannabidiol (CBD) treatment in dravet syndrome (DS): Results of the open-label  
38 extension (OLE) trial (GWPCARE5). *Annals of Neurology*. 2018;84 (Supplement 22):S344.  
39
- 40 95. Leehey M, Liu Y, Epstein C, Hart F, Bainbridge J, Cook M, et al. Open label study of cannabidiol in  
41 Parkinson's disease. *Movement Disorders*. 2017;32 (Supplement 2):913.  
42
- 43 96. Leehey MA, Liu Y, Hart F, Klawitter J, Sempio C, Fischer S, et al. Preliminary findings of the use of  
44 cannabis in Parkinson disease. *Movement Disorders*. 2019;34 (Supplement 1):S18-S9.  
45
- 46 97. Libzon S, Schleider LB, Saban N, Levit L, Tamari Y, Linder I, et al. Medical Cannabis for Pediatric  
47 Moderate to Severe Complex Motor Disorders. *Journal of Child Neurology*. 2018;33(9):565-71.  
48
- 49 98. Lindley EM, Razavi-Shearer D, Patel VV, Henry SE, McBeth Z, Burger EL, et al. Medical marijuana  
50 use characteristics in patients with chronic spine pain disorders. *Spine Journal*. 2013;1):84S.  
51
- 52 99. Lissoni P, Porro G, Messina G, Porta E, Rovelli F, Roselli MG, et al. Morphine, melatonin,  
53 Marijuana, Magnolia and MYRRH as the "five m" schedule in the treatment of cancer pain and the  
54  
55  
56  
57



- possible dose-dependency of the antitumor and analgesic effects of the pineal hormone melatonin. *Anticancer Research*. 2014;34 (10):6033-4.
100. Lothe C. The painful truth. *Nursing Standard*. 1999;13(52):25.
101. Luckett T, Agar M, Chye R, Lintzeris N, McGregor I, Allsop D, et al. Medicinal cannabis use and preferred mode of administration: Preliminary results from an anonymous patient survey to inform medicinal cannabis phase II and III trials for cancer-related anorexia-cachexia. *Palliative Medicine*. 2016;30 (6):NP88.
102. Macari D, Gbadamosi B, Ezekwudo D, Khoury J, Jaiyesimi IA, Gaikazian SS. Medical cannabis in cancer patients: Prevalence, efficacy, and safety. *Journal of Clinical Oncology Conference*. 2019;37(Supplement 15).
103. Maggioli C, Giannone FA, Baldassarre M, Fanelli F, Mezzullo M, Belluomo I, et al. Endocannabinoids in advanced cirrhosis: Have we picked the right one? *Digestive and Liver Disease*. 2012;1):S40.
104. Malfitano AM, Laezza C, D'Alessandro A, Procaccini C, Saccomanni G, Tuccinardi T, et al. Effects on immune cells of a new 1,8-naphthyridin-2-one derivative and its analogues as selective CB2 agonists: implications in multiple sclerosis. *PLoS ONE [Electronic Resource]*. 2013;8(5):e62511.
105. Martellucci I, Laera L, Lippi S, Marsili S, Petrioli R, Francini G. Impact of cannabinoids on the quality of life in oncology: Prospective observational study. *Annals of Oncology Conference: 17th National Congress of Medical Oncology Rome Italy Conference Publication*:. 2015;26(SUPPL. 6).
106. Mbachii C, Wang Y, Barkin JA, Demetria MV, Barkin JS, Kroner PT, et al. Does cannabis consumption impact chronic pancreatitis related complications? *American Journal of Gastroenterology*. 2019;114 (Supplement):S21-S2.
107. Mc Vige J, Bargnes VH, Shukri S, Mechtler L. Cannabis, concussion, and chronic pain: An ongoing retrospective analysis at Dent Neurologic Institute in Buffalo, NY. *Neurology*. 2018;91 (23 Supplement 1):S18-S9.
108. McLeod SA, Lemay JF. Medical cannabinoids. *CMAJ Canadian Medical Association Journal*. 2017;189(30):E995.
109. McQuay HJ. More evidence cannabis can help in neuropathic pain. *CMAJ Canadian Medical Association Journal*. 2010;182(14):1494-5.
110. McVige J, Kaur D, Hart P, Lillis M, Mechtler L, Bargnes V, et al. Medical cannabis in the treatment of post-traumatic concussion. *Neurology Conference: 71st Annual Meeting of the American Academy of Neurology, AAN*. 2019;92(15 Supplement 1).
111. Mechtler L, Bargnes V, Hart P, McVige J, Saikali N. Medical cannabis for chronic migraine: A retrospective review. *Neurology Conference: 71st Annual Meeting of the American Academy of Neurology, AAN*. 2019;92(15 Supplement 1).

- 1  
2  
3 112. Mechtler L, Hart P, Bargnes V, Saikali N. Medical cannabis treatment in patients with trigeminal  
4 neuralgia. Neurology Conference: 71st Annual Meeting of the American Academy of Neurology, AAN.  
5 2019;92(15 Supplement 1).  
6
- 7 113. Melen CM, Merrien M, Wasik A, Sonnevi K, Junlen HR, Christersson B, et al. A clinical trial of  
8 cannabis as targeted therapy for indolent leukemic lymphoma. Blood Conference: 61st Annual Meeting  
9 of the American Society of Hematology, ASH. 2019;134(Supplement 1).  
10
- 11 114. Melen CM, Merrien M, Wasik AM, Sonnevi K, Junlen H, Christensson B, et al. The cannabinoid  
12 study-01: Investigating the effects of cannabinoids in indolent leukemic B-cell lymphoma. Hematological  
13 Oncology. 2019;37 (Supplement 2):572.  
14
- 15 115. Mesquita B, Ferreira G, Corral LL, Riviera D, Pita A, Carrillo J, et al. Cannabinoids in the  
16 management of chronic GVHD - Experience of a center. Bone Marrow Transplantation. 2017;52  
17 (Supplement 1):233.  
18
- 19 116. Messenheimer JA, O'Brien T, Berkovic S, French J, Bonn-Miller M, Gutterman D. Transdermal  
20 cannabidiol (CBD) gel for the treatment of focal epilepsy in adults. Neurology. 2018;90 (24):e2188.  
21
- 22 117. Milstein SL, MacCannell K, Karr G, Clark S. Marijuana-produced changes in pain tolerance.  
23 Experienced and non-experienced subjects. International pharmacopsychiatry. 1975;10(3):177-82.  
24
- 25 118. Miodownik H, Bradford C, Starrels JL, Ogu UO, Thomas M, Cunningham CO, et al. Clinical  
26 characteristics and health care utilization patterns of sickle cell disease patients using marijuana. Blood  
27 Conference: 60th Annual Meeting of the American Society of Hematology, ASH. 2018;132(Suppl. 1).  
28
- 29 119. Mirman J. Why we need to legalize medical marijuana. One more potential therapy. Minnesota  
30 Medicine. 2014;97(4):38.  
31
- 32 120. Moreno M, Vaillancourt R, Pouliot A, Sell E, Hevenor B, Viracoumarane K. A survey of the use of  
33 cannabis in children at a tertiary teaching hospital. Canadian Journal of Hospital Pharmacy. 2018;71  
34 (1):72.  
35
- 36 121. Morera C. Palmitoylethanolamide (PEA) for sciatic pain associated to usual treatment. Pain  
37 Practice. 2012;1):88-9.  
38
- 39 122. Morrison G, Sardu ML, Rasmussen CH, Sommerville K, Roberts C, Blakey GE. Exposure-response  
40 analysis of cannabidiol for the treatment of lennox-gastaut syndrome. Epilepsia. 2018;59 (Supplement  
41 3):S11-S2.  
42
- 43 123. Morrison G, Sardu ML, Rasmussen CH, Sommerville K, Roberts C, Blakey GE. Exposure-Response  
44 Analysis of Cannabidiol (CBD) oral solution for the treatment of lennox-gastaut syndrome. Neurology  
45 Conference: 70th Annual Meeting of the American Academy of Neurology, AAN. 2018;90(15 Supplement  
46 1).  
47
- 48 124. Mousa A, Petrovic M, Laszlo S, Fleshner N. Is there a therapeutic role for cannabis in advanced  
49 prostate cancer? Exploring the patterns and predictors of use among men receiving androgen-  
50 deprivation therapy. Canadian Urological Association Journal. 2018;12 (6 Supplement 2):S126.  
51  
52  
53  
54  
55  
56  
57  
58  
59  
60

- 1  
2  
3 125. Mupamombe CT, Nathan RA, Case AA, Walter M, Hansen E. Efficacy of medical cannabis for  
4 cancer-related pain in the elderly: A single-center retrospective analysis. *Journal of Clinical Oncology*  
5 *Conference*. 2019;37(31 Supplement 1).  
6
- 7 126. Myers B, Geist T, Hart P, Aladeen T, Begley A, Westphal ES, et al. Medical cannabis in the  
8 treatment of parkinson's disease. *Neurology Conference: 71st Annual Meeting of the American*  
9 *Academy of Neurology, AAN*. 2019;92(15 Supplement 1).  
10
- 11 127. Nadal X, Del Rio C, Casano S, Palomares B, Ferreiro-Vera C, Navarrete C, et al.  
12 Tetrahydrocannabinolic acid is a potent PPARgamma agonist with neuroprotective activity. *British*  
13 *Journal of Pharmacology*. 2017;174(23):4263-76.  
14  
15
- 16 128. Naftali T, Bar Lev Schlieder L, Hirsch J, Lish I, Benjaminov F, Konikoff F. Cannabis use patterns in  
17 patients with IBD. *Journal of Crohn's and Colitis*. 2016;10 (Supplement 1):S375-S6.  
18
- 19 129. Naftali T, Bar Lev Schlieder L, Sklerovsky Benjaminov F, Lish I, Hirsch J, Konikoff FM. Cannabis  
20 induces clinical and endoscopic improvement in moderately active ulcerative colitis (UC). *Journal of*  
21 *Crohn's and Colitis*. 2018;12 (Supplement 1):S306.  
22
- 23 130. Naftali T, Bar-Lev L, Gabay G, Chowers Y, Dotan I, Bronshtein M, et al. Tetrahydrocannabinol  
24 (THC) rich medical cannabis induces clinical and biochemical improvement with a steroid sparing effect  
25 in active crohn's disease. *Gastroenterology*. 2012;1):S780.  
26
- 27 131. Naftali T, Barlev L, Gabay G, Chowers Y, Dotan I, Stein A, et al. Tetrahydrocannabinol (THC)  
28 induces clinical and biochemical improvement with a steroid sparing effect in active inflammatory bowel  
29 disease. *Journal of Crohn's and Colitis*. 2013;7 (SUPPL.1):S153.  
30  
31
- 32 132. Nathan RA, Tonderai C, Mupamombe, Walter M, Case AA, Hansen E. Use of medical cannabis in  
33 treating anorexia and nausea in elderly cancer patients. *Journal of Clinical Oncology Conference*.  
34 2019;37(31 Supplement 1).  
35
- 36 133. Nauck F, Klaschik E. [Dronabinol (delta9-tetrahydrocannabinol) in long-term treatment.  
37 Symptom control in patients with multiple sclerosis and spasticity, neuropathic pain, loss of appetite and  
38 cachexia]. *Der Schmerz*. 2004;18 Suppl 2:S26-30.  
39
- 40 134. Nct. Study to Evaluate the Efficacy of Dronabinol (Marinol) as Add-On Therapy for Patients on  
41 Opioids for Chronic Pain. <https://clinicaltrials.gov/show/NCT00153192>. 2005.  
42
- 43 135. Nct. Medicinal Cannabis for Painful HIV Neuropathy.  
44 <https://clinicaltrials.gov/show/NCT00255580>. 2005.  
45
- 46 136. Nct. Supporting Effect of Dronabinol on Behavioral Therapy in Fibromyalgia and Chronic Back  
47 Pain. <https://clinicaltrials.gov/show/NCT00176163>. 2005.  
48
- 49 137. Nct. Nabilone Versus Amitriptyline in Improving Quality of Sleep in Patients With Fibromyalgia.  
50 <https://clinicaltrials.gov/show/NCT00381199>. 2006.  
51
- 52 138. Nct. Multiple Sclerosis and Extract of Cannabis (MUSEC) Study.  
53 <https://clinicaltrials.gov/show/NCT00552604>. 2007.  
54  
55  
56  
57  
58  
59  
60

- 1  
2  
3 139. Nct. Efficacy and Safety Evaluation of Nabilone as Adjunctive Therapy to Gabapentin for the  
4 Management of Neuropathic Pain in Multiple Sclerosis. Clinicaltrials gov, national institutes of health  
5 [<http://www.clinicaltrials.gov>]. 2007.  
6  
7 140. Nct. A Study to Determine the Maintenance of Effect After Long-term Treatment of Sativex® in  
8 Subjects With Neuropathic Pain. <https://clinicaltrials.gov/show/NCT00713817>. 2008.  
9  
10 141. Nct. Prevention of Postoperative Nausea and Vomiting (PONV) in Surgical Patients.  
11 <https://clinicaltrials.gov/show/NCT00757822>. 2008.  
12  
13 142. Nct. Sativex for Treatment of Chemotherapy Induced Neuropathic Pain.  
14 <https://clinicaltrials.gov/show/NCT00872144>. 2009.  
15  
16 143. Nct. Efficacy and Safety of the Pain Relieving Effect of Dronabinol in Central Neuropathic Pain  
17 Related to Multiple Sclerosis. Clinicaltrials gov, national institutes of health [<http://www.clinicaltrials.gov>]. 2009.  
18  
19 144. Nct. A Study of the Safety and Effectiveness of Sativex®<sup>®</sup>, for the Relief of Symptoms of  
20 Spasticity in Subjects With Multiple Sclerosis (MS). Clinicaltrials gov, national institutes of health  
21 [<http://www.clinicaltrials.gov>]. 2010.  
22  
23 145. Nct. Palmitoylethanolamide for Post-operative Pain Prevention.  
24 <https://clinicaltrials.gov/show/NCT01491191>. 2011.  
25  
26 146. Nct. Efficacy Study of Δ9-THC to Treat Chronic Abdominal Pain.  
27 <https://clinicaltrials.gov/show/NCT01318369>. 2011.  
28  
29 147. Nct. Vaporized Cannabis and Spinal Cord Injury Pain.  
30 <https://clinicaltrials.gov/show/NCT01555983>. 2012.  
31  
32 148. Nct. Δ9-THC (Namisol®) in Chronic Pancreatitis Patients Suffering From Persistent Abdominal  
33 Pain. <https://clinicaltrials.gov/show/NCT01551511>. 2012.  
34  
35 149. Nct. A Study of Cannabis Based Medicine Extracts and Placebo in Patients With Pain Due to  
36 Spinal Cord Injury. <https://clinicaltrials.gov/show/NCT01606202>. 2012.  
37  
38 150. Nct. Safety and Efficacy Study of Dronabinol to Treat Obstructive Sleep Apnea.  
39 <https://clinicaltrials.gov/show/NCT01755091>. 2012.  
40  
41 151. Nct. Vaporized Cannabis for Chronic Pain Associated With Sickle Cell Disease.  
42 <https://clinicaltrials.gov/show/NCT01771731>. 2013.  
43  
44 152. Nct. Combined THC and CBD Drops for Treatment of Crohn's Disease.  
45 <https://clinicaltrials.gov/show/NCT01826188>. 2013.  
46  
47 153. Nct. Phase 1 Study to Study the Efficacy and Safety of Cannabis in the Treatment of Tinnitus.  
48 Clinicaltrials.gov [[www.clinicaltrials.gov](http://www.clinicaltrials.gov)]. 2013.  
49  
50 154. Nct. Safety and Efficacy of Nabilone in Alzheimer's Disease.  
51 <http0s://clinicaltrials.gov/show/NCT02351882>. 2014.  
52  
53  
54  
55  
56  
57  
58  
59  
60

- 1  
2  
3 155. Nct. Cannabidiol Oral Solution as an Adjunctive Therapy for Treatment of Participants With  
4 Inadequately Controlled Dravet Syndrome. <https://clinicaltrials.gov/show/NCT02318563>. 2014.  
5  
6 156. Nct. Cannabidiol Oral Solution as an Adjunctive Therapy for Treatment of Participants With  
7 Inadequately Controlled Lennox-Gastaut Syndrome. <https://clinicaltrials.gov/show/NCT02318537>. 2014.  
8  
9 157. Nct. Cannabinoid Profile Investigation of Vapourized Cannabis in Patients With Osteoarthritis of  
10 the Knee. <https://clinicaltrials.gov/show/NCT02324777>. 2014.  
11  
12 158. Nct. Investigation of Cannabinoid Receptor Agonist Dronabinol in Patients With Functional Chest  
13 Pain. <https://clinicaltrials.gov/show/NCT02569073>. 2015.  
14  
15 159. Nct. The Safety, Tolerability and Efficacy of Dronabinol, for the Treatment of Nausea and  
16 Vomiting in Familial Dysautonomia. <https://clinicaltrials.gov/show/NCT02608931>. 2015.  
17  
18 160. Nct. Trial of Dronabinol and Vaporized Cannabis in Neuropathic Low Back Pain.  
19 <https://clinicaltrials.gov/show/NCT02460692>. 2015.  
20  
21 161. Nct. The Effects of Cannabis on Dystonia and Spasticity on Pediatric Patients.  
22 <https://clinicaltrials.gov/show/NCT02470325>. 2015.  
23  
24 162. Nct. Evaluating Safety and Efficacy of Cannabis in Participants With Chronic Posttraumatic Stress  
25 Disorder. <https://clinicaltrials.gov/show/NCT02517424>. 2015.  
26  
27 163. Nct. Nabilone Effect on the Attenuation of Anorexia, Nutritional Status and Quality of Life in  
28 Lung Cancer Patients. <https://clinicaltrials.gov/show/NCT02802540>. 2016.  
29  
30 164. Nct. Cannabidiol Oral Solution for the Treatment of Subjects With Prader-Willi Syndrome.  
31 <https://clinicaltrials.gov/show/NCT02844933>. 2016.  
32  
33 165. Nct. Investigation of Cannabis for Chronic Pain and Palliative Care.  
34 <https://clinicaltrials.gov/show/NCT02683018>. 2016.  
35  
36 166. Nct. Effect of Cannabis and Endocannabinoids on HIV Neuropathic Pain.  
37 <https://clinicaltrials.gov/show/NCT03099005>. 2017.  
38  
39 167. Nct. Cannabis Oil for Pain in Parkinson's Disease. <https://clinicaltrials.gov/show/NCT03639064>.  
40 2018.  
41  
42 168. Nct. A Study to Assess the Efficacy, Safety, and Tolerability of Cannabidiol Oral Solution With  
43 Vigabatrin as Initial Therapy in Participants With Infantile Spasms.  
44 <https://clinicaltrials.gov/show/NCT03421496>. 2018.  
45  
46 169. Nct. A Study to Examine the Efficacy of a Therapeutic THX-110 for Tourette Syndrome.  
47 <https://clinicaltrials.gov/show/NCT03651726>. 2018.  
48  
49 170. Nct. Cannabis For Cancer-Related Symptoms. <https://clinicaltrials.gov/show/NCT03948074>.  
50 2019.  
51  
52  
53  
54  
55  
56  
57  
58  
59  
60

- 1  
2  
3 171. Nct. A Phase 2a Study to Evaluate the Safety, Tolerability and Efficacy of Cannabidiol as a  
4 Steroid-sparing Therapy in Steroid-dependent Crohn's Disease Patients.  
5 <https://clinicaltrials.gov/show/NCT04056442>. 2019.  
6  
7 172. Nct. Cannabinoids and an Anti-inflammatory Diet for the Treatment of Neuropathic Pain After  
8 Spinal Cord Injury. <https://clinicaltrials.gov/show/NCT04057456>. 2019.  
9  
10 173. Nct. Efficacy and Safety of Dronabinol in the Improvement of Chemotherapy-induced and  
11 Tumor-related Symptoms in Advanced Pancreatic Cancer. <https://clinicaltrials.gov/show/NCT03984214>.  
12 2019.  
13  
14 174. Nct. Study to Investigate the Efficacy and Safety of Cannabis Oil for the Treatment of Subjects  
15 With Hidradenitis Suppurativa. <https://clinicaltrials.gov/show/NCT03929835>. 2019.  
16  
17 175. Nct. Pain Response to Cannabidiol in Induced Acute Nociceptive Pain, Allodynia and  
18 Hyperalgesia By Using a Model Mimicking Acute Pain in Healthy Adults.  
19 <https://clinicaltrials.gov/show/NCT03985995>. 2019.  
20  
21 176. Nct. Efficacy and Safety of Cannabidiol for Gastroparesis and Functional Dyspepsia.  
22 <https://clinicaltrials.gov/show/NCT03941288>. 2019.  
23  
24 177. Ngan TYT, Litt M, Eguzo K, Thiel JA. Patient Outcomes Following Initiation of Medical Cannabis in  
25 Women with Chronic Pelvic Pain. *Journal of Minimally Invasive Gynecology*. 2019;26 (7  
26 Supplement):S89-S90.  
27  
28 178. Nickels K. Cannabidiol in patients with intractable epilepsy due to TSC: A possible medication but  
29 not a miracle. *Epilepsy Currents*. 2017;17(2):91-2.  
30  
31 179. Nicolodi M, Pinnaro MS, Sandoval V. Selected cannabinoids and cutaneous allodynia in chronic  
32 refractory migraine. *Journal of Headache and Pain Conference: 12th European Headache Federation*  
33 *Congress and the 32nd National Congress of the Italian Society for the Study of Headaches Italy*.  
34 2018;19(Supplement 1).  
35  
36 180. Nicolodi M, Pinnaro MS, Sandoval V, Torrini A. Possible effects, side-effects and adverse events  
37 of a selective cannabinoid (6% THC/7.5% CBD) in refractory chronic migraine. 2013-2018 pilot data.  
38 *Journal of Headache and Pain Conference: 12th European Headache Federation Congress and the 32nd*  
39 *National Congress of the Italian Society for the Study of Headaches Italy*. 2018;19(Supplement 1).  
40  
41 181. Nicolodi M, Sandoval V, Torrini A. Therapeutic use of cannabinoids-dose finding, effects and  
42 pilot data of effects in chronic migraine and cluster headache. *European Journal of Neurology*. 2017;24  
43 (Supplement 1):287.  
44  
45 182. Nikles CJ, Yelland M, Glasziou PP, Del Mar C. Do individualized medication effectiveness tests (n-  
46 of-1 trials) change clinical decisions about which drugs to use for osteoarthritis and chronic pain?  
47 *American Journal of Therapeutics*. 2005;12(1):92-7.  
48  
49 183. Notcutt W, Phillips C, Hughes J, Lacoux P, Vijayakulasingam V, Baldock L. A retrospective  
50 description of the use of nabilone in UK clinical practice. *Multiple Sclerosis*. 2014;1):468.  
51  
52  
53  
54  
55  
56  
57  
58  
59  
60

- 1  
2  
3 184. Patel A, Gil-Nagel A, Chin R, Mitchell W, Perry MS, Weinstock A, et al. Long-term safety and  
4 efficacy of add-on cannabidiol (CBD) treatment in patients with lennox gastaut syndrome in an  
5 openlabel extension trial (GWPCARE5). *Neurology Conference: 71st Annual Meeting of the American*  
6 *Academy of Neurology, AAN.* 2019;92(15 Supplement 1).
- 7  
8 185. Patel A, Gil-Nagel A, Chin R, Mitchell W, Perry MS, Weinstock A, et al. Long-term safety and  
9 efficacy of add-on cannabidiol treatment in patients with Lennox Gastaut syndrome in an open-label  
10 extension trial (GWPCARE5). *Developmental Medicine and Child Neurology.* 2019;61 (Supplement 1):13.  
11  
12 186. Patti F, Chisari C, D'Amico E, Solaro C, Arena S, Annunziata P, et al. Long-term effectiveness of 9-  
13 delta-tetrahydrocannabinol:Cannabidiol oromucosal spray in clinical practice: Results from a 18-months  
14 multicenter Italian study. *Neurology Conference: 71st Annual Meeting of the American Academy of*  
15 *Neurology, AAN.* 2019;92(15 Supplement 1).
- 16  
17 187. Patti F, Messina S, Amato MP, Benedetti MD, Bergamaschi R, Bertolotto A, et al. Multicenter,  
18 prospective, observational study aimed at evaluating SATivex eFFects (effectiveness and tolerability) in a  
19 large population of Italian multiple sclerosis patients: SA.FE. Study. *Multiple Sclerosis.* 2015;1):613-5.  
20  
21 188. Perello Alonso M, Ivanov P. [Pain, cannabis, psychosis. A logical sequence?]. *Revista Espanola de*  
22 *Geriatria y Gerontologia.* 2017;52(6):350-1.  
23  
24 189. Pires C, Lachiewicz M. A pilot survey of marijuana use and self-reported benefit in women with  
25 chronic pelvic pain. *Pain Medicine (United States).* 2018;19 (4):890.  
26  
27 190. Plummer R, Anthony A, Evans J, Haris N, D'Archangelo M, Slater S, et al. A phase I dose  
28 escalation study to assess the safety tolerability and pharmacokinetics of ETS2101 in patients (pts) with  
29 advanced solid tumours. *European Journal of Cancer.* 2015;3):S58-S9.  
30  
31 191. Poli P, Salvadori C, Sannino C. Effects of cannabis based drugs on chronic neuropathic pain:  
32 Comparison between italian and dutch medical cannabis variety. *Pain Practice.* 2018;18 (Supplement  
33 1):101.  
34  
35 192. Quintans JS, Antonioli AR, Almeida JR, Santana-Filho VJ, Quintans-Junior LJ. Natural products  
36 evaluated in neuropathic pain models - a systematic review. *Basic & Clinical Pharmacology & Toxicology.*  
37 2014;114(6):442-50.  
38  
39 193. Reisfield GM. Medical cannabis and chronic opioid therapy. *Journal of Pain & Palliative Care*  
40 *Pharmacotherapy.* 2010;24(4):356-61.  
41  
42 194. Reznik I. Post-traumatic stress disorder and medical cannabis use: A naturalistic observational  
43 study. *European Neuropsychopharmacology.* 2012;2):S363-S4.  
44  
45 195. Reznik I. Medical marijuana/cannabis treatment of Tourette's syndrome: Focus on the quality of  
46 life. *European Neuropsychopharmacology.* 2014;2):S645-S6.  
47  
48 196. Robinson D, Garti A, Yassin M. Cannabis treatment of diabetic neuropathy: Treatment effect and  
49 change in health over a 6 month period. *Foot and Ankle Surgery.* 2016;1):58.  
50  
51 197. Ron A, Abuhasira R, Novack V. Establishment of a specialized geriatric clinic providing medical  
52 cannabis. *Journal of the American Geriatrics Society.* 2019;67 (Supplement 1):S299.  
53  
54  
55  
56  
57  
58  
59  
60

- 1  
2  
3 198. Roy A, Konda M, Goel A, Sasapu A. Characteristics of marijuana usage in sickle cell patients.  
4 Journal of Investigative Medicine. 2020;68 (2):646.  
5
- 6 199. Roy AM, Konda M, Goel A, Sasapu A. Characteristics of marijuana usage in sickle cell patients: A  
7 nationwide analysis. Blood Conference: 61st Annual Meeting of the American Society of Hematology,  
8 ASH. 2019;134(Supplement 1).  
9
- 10 200. Russo EB, Killestein J, Uitdehaag BMJ, Polman CH. Safety, tolerability, and efficacy of orally  
11 administered cannabinoids in MS (multiple letters). Neurology. 2003;60(4):729-30.  
12
- 13 201. Sacca F, Pane C, Carotenuto A, Massarelli M, Lanzillo R, Florio EB, et al. The use of medical-grade  
14 Cannabis (Bedrocan®) in patients non-responders to nabiximols (sativex®). Multiple sclerosis  
15 (houndmills, basingstoke, england). 2016;22:686-.  
16
- 17 202. Sallan S, Zinberg N, Frei E. Oral delta 9 tetrahydrocannabinol (THC) in the prevention of vomiting  
18 (V) associated with cancer chemotherapy (CC). Proceedings of the American Association for Cancer  
19 Research. 1975;16(66):No. 575.  
20
- 21 203. Sastre-Garriga J, Vila C, Clissold S, Montalban X. THC and CBD oromucosal spray (Sativex) in the  
22 management of spasticity associated with multiple sclerosis. Expert Review of Neurotherapeutics.  
23 2011;11(5):627-37.  
24
- 25 204. Saxon AJ, Browne KW. Marijuana not ready for prime time as an analgesic. General Hospital  
26 Psychiatry. 2014;36(1):4-6.  
27
- 28 205. Scheffer IE, Halford J, Nabbout R, Sanchez-Carpintero R, Shiloh Malawsky Y, Wong M, et al.  
29 Long-term safety and efficacy of add-on cannabidiol (CBD) treatment in patients with Dravet syndrome  
30 (DS) in an open-label extension (OLE) trial. Developmental Medicine and Child Neurology. 2019;61  
31 (Supplement 1):63.  
32
- 33 206. Schimpfoss M, Berweck S, Betzler C, Dotzler E, Herberhold T, Pringsheim M, et al. Retrospective  
34 analysis of tetrahydrocannabinol based on 31 neurologically critically ill children. Neuropediatrics  
35 Conference: 41st Annual Meeting of the Society of Neuropediatrics Switzerland. 2015;46(Supplement 1).  
36
- 37 207. Schorn M, Krashin D, Mannava A, Belaskova S, Murinova N. Marijuana use in headache in a  
38 university-based headache clinic. Neurology Conference: 71st Annual Meeting of the American Academy  
39 of Neurology, AAN. 2019;92(15 Supplement 1).  
40
- 41 208. Seibert SM, Kumar P, Gomez PL, Gomez CN, Miller LM, Logsdon M. Cannabis in cancer patients  
42 [CP] to improve quality of life [QOL] and cancer related symptoms [CRS]: Illinois cancer care cannabis  
43 education and clinical analysis. Journal of Clinical Oncology Conference. 2018;36(15 Supplement 1).  
44
- 45 209. Shipton EA, Shipton EE. Should doctors be allowed to prescribe cannabinoids for pain in  
46 Australia and New Zealand? Australian & New Zealand Journal of Psychiatry. 2014;48(4):310-3.  
47
- 48 210. Slaven M, Levine M, Parpia S, Shaw E. An approach to dosing: The cannabis oil in pain  
49 effectiveness (COPE) trial. Medical Cannabis and Cannabinoids. 2019;2 (2):2.  
50
- 51 211. Spittel S, Funke A, Kettemann D, Maier A, Gajewski N, Baldes T, et al. Patients' satisfaction and  
52 usability for tetrahydrocannabinol/cannabidiol (THC:CBD) in the treatment of spasticity in patients with  
53  
54  
55  
56  
57  
58  
59  
60



- 1  
2  
3 amyotrophic lateral sclerosis (ALS). *Amyotrophic Lateral Sclerosis and Frontotemporal Degeneration*.  
4 2018;19 (Supplement 1):376.  
5
- 6 212. Stern P, Roberts L. The future of pain research. *Science*. 2016;354(6312):564-5.  
7
- 8 213. Sutton IR, Daeninck P. Cannabinoids in the management of intractable chemotherapy-induced  
9 nausea and vomiting and cancer-related pain. *The Journal of Supportive Oncology*. 2006;4(10):531-5.  
10
- 11 214. Szaflarski JP, Bebin EM, Gaston T, Grayson L, Liu Y, Cutter G, et al. Improvements in seizure  
12 frequency parallel improvements in seizure severity in an open label study of cannabidiol. *Epilepsia*.  
13 2017;58 (Supplement 5):S158.  
14
- 15 215. Taha T, Meiri D, Talhamy S, Wollner M, Peer A, Bar-Sela G. Cannabis Impacts Tumor Response  
16 Rate to Nivolumab in Patients with Advanced Malignancies. *Oncologist*. 2019;24(4):549-54.  
17
- 18 216. Thirlwell C, Rainville K, Miri D, Donath A, Shulman H. New frontiers in treating chronic insomnia  
19 in Canadian veterans with PTSD: Retrospective analysis reveals an innovative role for medical cannabis  
20 in optimizing sleep/wake health. *Medical Cannabis and Cannabinoids*. 2018;1 (2):126.  
21
- 22 217. Tripp D, Nickel JC, Laura K, Ginting JV, Mark W, Santor D. Cannabis (marijuana) use in men with  
23 chronic prostatitis / chronic pelvic pain syndrome. *Journal of Urology*. 2012;1):e439-e40.  
24
- 25 218. Trojano M. THC:CBD Observational Study Data: Evolution of Resistant MS Spasticity and  
26 Associated Symptoms. *European Neurology*. 2016;75 Suppl 1:4-8.  
27
- 28 219. Vermersch P, Trojano M. Tetrahydrocannabinol + cannabidiol oromucosal spray for multiple  
29 sclerosis resistant spasticity on daily practice, new data. *Multiple Sclerosis*. 2016;22 (Supplement 3):377.  
30
- 31 220. Vezyroglou K, Eltze C, Varadkar S, Carr L, O'Sullivan C, Ninnis E, et al. Efficacy and safety of  
32 cannabidiol as add-on therapy in drugresistant epilepsy, a single center experience. *European Journal of*  
33 *Paediatric Neurology*. 2017;21 (Supplement 1):e87.  
34
- 35 221. Vezyroglou K, Eltze C, Varadkar S, Carr L, Sullivan CO, Ninnis E, et al. Cannabidiol as add on  
36 therapy in children with complex epilepsy. *Developmental Medicine and Child Neurology*. 2017;59  
37 (Supplement 1):17.  
38
- 39 222. Voelker R. States Move to Substitute Opioids With Medical Marijuana to Quell Epidemic. *JAMA*.  
40 2018;320(23):2408-10.  
41
- 42 223. Vorobeichik L, Bhatia A, Buzon-Tan A, Walker S, Kirkham K, Ilangomaran D, et al. Risk factors for  
43 failure of Patient-Controlled Oral Analgesia after total hip and knee arthroplasty. *Regional Anesthesia*  
44 *and Pain Medicine Conference: 42nd Annual Regional Anesthesiology and Acute Pain Medicine Meeting,*  
45 *ASRA*. 2017;42(6).  
46
- 47 224. Webb CW, Webb SM. Therapeutic benefits of cannabis: a patient survey. *Hawai'i Journal of*  
48 *Medicine & Public Health : A Journal of Asia Pacific Medicine & Public Health*. 2014;73(4):109-11.  
49
- 50 225. Werth VP, Hejazi E, Pena S, Haber J, Feng R, Patel B, et al. Study of safety and efficacy of  
51 lenabasum, a cannabinoid receptor type 2 agonist, in refractory skin-predominant dermatomyositis.  
52 *Journal of Investigative Dermatology*. 2018;138 (5 Supplement 1):S103.  
53  
54  
55  
56  
57  
58  
59  
60

- 1  
2  
3 226. Wilsey B, Marcotte T, Deutsch R, Gouaux B, Sakai S, Donaghe H. Low-dose vaporized cannabis  
4 significantly improves neuropathic pain. *Journal of Pain*. 2013;14(2):136-48.  
5  
6 227. Wilsey B, Marcotte T, Tsodikov A, Millman J, Bentley H, Gouaux B, et al. A randomized, placebo-  
7 controlled, crossover trial of cannabis cigarettes in neuropathic pain. *Journal of Pain*. 2008;9(6):506-21.  
8  
9 228. Wilson M, Masterson E, Broglio K. Cannabis Use Among Patients Prescribed Opioids in a  
10 Palliative Care Clinic (S875). *Journal of Pain and Symptom Management*. 2019;57 (2):522.  
11  
12 229. Wilson MM, Masterson E, Broglio K. Cannabis Use among Patients in a Rural Academic Palliative  
13 Care Clinic. *Journal of Palliative Medicine*. 2019;22(10):1224-6.  
14  
15 230. Wirrell E, Privitera M, Bhathal H, Wong M, Cross J, Sommerville K. Cannabidiol (CBD) treatment  
16 effect and adverse events (AES) by time in patients with lennox-gastaut syndrome (LGS): Pooled results  
17 from 2 trials. *Annals of Neurology*. 2018;84 (Supplement 22):S341.  
18  
19 231. Wright S, Etges T. An observational post approval registry study of patients prescribed Sativex.  
20 Results from clinical practice. (#14). *Multiple Sclerosis*. 2012;18 (5):S30.  
21  
22 232. Xu JJ, Diaz P, Astruc-Diaz F, Craig S, Munoz E, Naguib M. Pharmacological characterization of a  
23 novel cannabinoid ligand, MDA19, for treatment of neuropathic pain. *Anesthesia & Analgesia*.  
24 2010;111(1):99-109.  
25  
26 233. Zajicek J. Cannabinoids on trial for multiple sclerosis. *Lancet Neurology*. 2002;1(3):147.  
27  
28 234. Zajicek JP, Hobart JC, Slade A, Barnes D, Mattison PG, Group MR. Multiple sclerosis and extract  
29 of cannabis: results of the MUSEC trial. *Journal of Neurology, Neurosurgery & Psychiatry*.  
30 2012;83(11):1125-32.  
31  
32 235. Zajicek JP, Sanders HP, Wright DE, Vickery PJ, Ingram WM, Reilly SM, et al. Cannabinoids in  
33 multiple sclerosis (CAMS) study: safety and efficacy data for 12 months follow up. *Journal of Neurology,*  
34 *Neurosurgery & Psychiatry*. 2005;76(12):1664-9.  
35  
36 236. Zetl U, Henze T, Pfiffner C, Vila Silvan C, Flachenecker P. Effectiveness of Sativex in multiple  
37 sclerosis spasticity. First data from a large observational study in Germany. *Multiple Sclerosis*.  
38 2012;1):246.  
39  
40 237. Zetl UK, Rommer P, Hipp P, Patejdl R. Evidence for the efficacy and effectiveness of THC-CBD  
41 oromucosal spray in symptom management of patients with spasticity due to multiple sclerosis.  
42 *Therapeutic Advances in Neurological Disorders*. 2016;9(1):9-30.  
43  
44 238. Zhou R, Jacobson C, Weng J, Cheng E, Lay J, Hung P, et al. Potential efficacy of cannabidiol for  
45 treatment of refractory infantile spasms and lennox gastaut syndrome. *Epilepsy Currents*. 2015;1):360-1.  
46  
47 239. Ziemssen T. Tetrahydrocannabinol: Cannabidiol oromucosal spray for treating symptoms of  
48 multiple sclerosis spasticity: Newest evidence. *Neurodegenerative Disease Management*. 2019;9(2s):1-2.  
49  
50  
51

### Study did not include patients with chronic pain

- 52  
53  
54 1. Abuhasira R, Ron A, Sikorin I, Novack V. Medical cannabis for older patients-treatment protocol  
55 and initial results. *Journal of Clinical Medicine*. 2019;8 (11) (no pagination)(1819).  
56  
57  
58  
59  
60

2. Adejumo AC, Adegbala OM, Adejumo KL, Bukong TN. Reduced Incidence and Better Liver Disease Outcomes among Chronic HCV Infected Patients Who Consume Cannabis. *Canadian Journal of Gastroenterology and Hepatology*. 2018;2018 (no pagination)(9430953).
3. Allen D. Dronabinol Therapy: Central Nervous System Adverse Events in Adults With Primary Brain Tumors. *Clinical Journal of Oncology Nursing*. 2019;23(1):23-6.
4. Balash Y, Bar-Lev Schleider L, Korczyn AD, Shabtai H, Knaani J, Rosenberg A, et al. Medical Cannabis in Parkinson Disease: Real-Life Patients' Experience. *Clinical Neuropharmacology*. 2017;40(6):268-72.
5. Bar-Lev Schleider L, Mechoulam R, Lederman V, Hilou M, Lencovsky O, Betzalel O, et al. Prospective analysis of safety and efficacy of medical cannabis in large unselected population of patients with cancer. *European Journal of Internal Medicine*. 2018;49:37-43.
6. Bar-Sela G, Vorobeichik M, Drawsheh S, Omer A, Goldberg V, Muller E. The medical necessity for medicinal cannabis: prospective, observational study evaluating the treatment in cancer patients on supportive or palliative care. *Evidence-Based Complementary & Alternative Medicine: eCAM*. 2013;2013:510392.
7. Beal JE, Olson R, Lefkowitz L, Laubenstein L, Bellman P, Yangco B, et al. Long-term efficacy and safety of dronabinol for acquired immunodeficiency syndrome-associated anorexia. *Journal of Pain & Symptom Management*. 1997;14(1):7-14.
8. Bobitt J, Qualls SH, Schuchman M, Wickersham R, Lum HD, Arora K, et al. Qualitative Analysis of Cannabis Use Among Older Adults in Colorado. *Drugs & Aging*. 2019;36(7):655-66.
9. Bouso JC, Jimenez-Garrido D, Ona G, Woznica D, Dos Santos RG, Hallak JEC, et al. Quality of Life, Mental Health, Personality and Patterns of Use in Self-Medicated Cannabis Users with Chronic Diseases: A 12-Month Longitudinal Study. *Phytotherapy Research*. 2020;21:21.
10. Boyd CJ, Veliz PT, McCabe SE. Adolescents' Use of Medical Marijuana: A Secondary Analysis of Monitoring the Future Data. *Journal of Adolescent Health*. 2015;57(2):241-4.
11. Bruce D, Brady JP, Foster E, Shattell M. Preferences for Medical Marijuana over Prescription Medications Among Persons Living with Chronic Conditions: Alternative, Complementary, and Tapering Uses. *Journal of Alternative & Complementary Medicine*. 2018;24(2):146-53.
12. Cameron C, Watson D, Robinson J. Use of a synthetic cannabinoid in a correctional population for posttraumatic stress disorder-related insomnia and nightmares, chronic pain, harm reduction, and other indications: a retrospective evaluation. *Journal of Clinical Psychopharmacology*. 2014;34(5):559-64.
13. Carlini BH, Garrett SB, Carter GT. Medicinal Cannabis: A Survey Among Health Care Providers in Washington State. *The American journal of hospice & palliative care*. 2017;34(1):85-91.
14. Chen KA, Farrar M, Cardamone M, Gill D, Smith R, Cowell CT, et al. Cannabidiol for treating drug-resistant epilepsy in children: the New South Wales experience. *Medical Journal of Australia*. 2018;209(5):217-21.

15. Choi NG, DiNitto DM, Marti CN. Nonmedical versus medical marijuana use among three age groups of adults: Associations with mental and physical health status. *American Journal on Addictions*. 2017;26(7):697-706.
16. Clark AJ, Ware MA, Yazer E, Murray TJ, Lynch ME. Patterns of cannabis use among patients with multiple sclerosis. *Neurology*. 2004;62(11):2098-100.
17. Darke S, Duflou J, Farrell M, Peacock A, Lappin J. Characteristics and circumstances of synthetic cannabinoid-related death. *Clinical Toxicology: The Official Journal of the American Academy of Clinical Toxicology & European Association of Poisons Centres & Clinical Toxicologists*. 2019:1-7.
18. Davies BH, Weatherstone RM, Graham JDP, Griffiths RD. A pilot study of orally administered DELTA trans tetrahydrocannabinol in the management of patients undergoing radiotherapy for carcinoma of the bronchus. *BritJClinPharmacol*. 1974;1(4):301-6.
19. Devinsky O, Marsh E, Friedman D, Thiele E, Laux L, Sullivan J, et al. Cannabidiol in patients with treatment-resistant epilepsy: an open-label interventional trial. *Lancet Neurology*. 2016;15(3):270-8.
20. Devinsky O, Marsh E, Friedman D, Thiele E, Laux L, Sullivan J, et al. "Cannabidiol in patients with treatment-resistant epilepsy: An open-label interventional trial": Corrections. *The Lancet Neurology*. 2016;15(4):352.
21. Ebrahimi-Fakhari D, Agricola KD, Tudor C, Krueger D, Franz DN. Cannabidiol Elevates Mechanistic Target of Rapamycin Inhibitor Levels in Patients With Tuberous Sclerosis Complex. *Pediatric Neurology*. 2020;105:59-61.
22. Etges T, Karolia K, Grint T, Taylor A, Lauder H, Daka B, et al. An observational postmarketing safety registry of patients in the UK, Germany, and Switzerland who have been prescribed Sativex (THC: CBD, nabiximols) oromucosal spray. *Therapeutics and Clinical Risk Management*. 2016;12:1667-75.
23. Felix-Ukwu F, Reichert K, Bernhardt MB, Schafer ES, Berger A. Evaluation of aprepitant for acute chemotherapy-induced nausea and vomiting in children and adolescents with acute lymphoblastic leukemia receiving high-dose methotrexate. *Pediatric Blood and Cancer*. 2018;65 (2) (no pagination)(e26857).
24. Ferre L, Nuara A, Pavan G, Radaelli M, Moiola L, Rodegher M, et al. Efficacy and safety of nabiximols (Sativex) on multiple sclerosis spasticity in a real-life Italian monocentric study. *Neurological Sciences*. 2016;37(2):235-42.
25. Flachenecker P, Henze T, Zettl UK. Nabiximols (THC/CBD Oromucosal Spray, Sativex) in clinical practice - results of a multicenter, non-interventional study (MOVE 2) in patients with multiple sclerosis spasticity. *European Neurology*. 2014;71(5-6):271-9.
26. Freeman JL. Safety of cannabidiol prescribed for children with refractory epilepsy. *Medical Journal of Australia*. 2018;209(5):228-9.
27. Gazibara T, Prpic M, Maric G, Pekmezovic T, Kiscic-Tepavcevic D. Medical Cannabis in Serbia: The Survey of Knowledge and Attitudes in an Urban Adult Population. *Journal of Psychoactive Drugs*. 2017;49(3):217-24.

- 1  
2  
3 28. Gorter RW, Butorac M, Cobian EP, van der Sluis W. Medical use of cannabis in the Netherlands.  
4 Neurology. 2005;64(5):917-9.  
5
- 6 29. Goulet-Stock S, Rueda S, Vafaei A, Ialomiteanu A, Manthey J, Rehm J, et al. Comparing Medical  
7 and Recreational Cannabis Users on Socio-Demographic, Substance and Medication Use, and Health and  
8 Disability Characteristics. European Addiction Research. 2017;23(3):129-35.  
9
- 10 30. Grella CE, Rodriguez L, Kim T. Patterns of medical marijuana use among individuals sampled  
11 from medical marijuana dispensaries in los angeles. Journal of Psychoactive Drugs. 2014;46(4):267-75.  
12
- 13 31. Gulbransen G, Xu W, Arroll B. Cannabidiol prescription in clinical practice: an audit on the first  
14 400 patients in New Zealand. Bjpg Open. 2020;04:04.  
15
- 16 32. Hausman-Kedem M, Menascu S, Kramer U. Efficacy of CBD-enriched medical cannabis for  
17 treatment of refractory epilepsy in children and adolescents - An observational, longitudinal study. Brain  
18 & Development. 2018;40(7):544-51.  
19
- 20 33. Hermanns-Clausen M, Kneisel S, Szabo B, Auwarter V. Acute toxicity due to the confirmed  
21 consumption of synthetic cannabinoids: clinical and laboratory findings. Addiction. 2013;108(3):534-44.  
22
- 23 34. Highet BH, Lesser ER, Johnson PW, Kaur JS. Tetrahydrocannabinol and Cannabidiol Use in an  
24 Outpatient Palliative Medicine Population. American Journal of Hospice & Palliative Medicine.  
25 2020:1049909119900378.  
26
- 27 35. Hussain SA, Zhou R, Jacobson C, Weng J, Cheng E, Lay J, et al. Perceived efficacy of cannabidiol-  
28 enriched cannabis extracts for treatment of pediatric epilepsy: A potential role for infantile spasms and  
29 Lennox-Gastaut syndrome. Epilepsy & Behavior. 2015;47:138-41.  
30
- 31 36. Johnson-Sasso CP, Tompkins C, Kao DP, Walker LA. Marijuana use and short-term outcomes in  
32 patients hospitalized for acute myocardial infarction. PLoS ONE. 2018;13 (7) (no pagination)(e0199705).  
33
- 34 37. Khelemsky Y, Goldberg AT, Hurd YL, Winkel G, Ninh A, Qian L, et al. Perioperative Patient Beliefs  
35 Regarding Potential Effectiveness of Marijuana (Cannabinoids) for Treatment of Pain: A Prospective  
36 Population Survey. Regional Anesthesia & Pain Medicine. 2017;42(5):652-9.  
37
- 38 38. Klotz KA, Grob D, Hirsch M, Metternich B, Schulze-Bonhage A, Jacobs J. Efficacy and Tolerance of  
39 Synthetic Cannabidiol for Treatment of Drug Resistant Epilepsy. Frontiers in Neurology. 2019;10 (no  
40 pagination)(1313).  
41
- 42 39. Koehler J, Feneberg W, Meier M, Pollmann W. Clinical experience with THC:CBD oromucosal  
43 spray in patients with multiple sclerosis-related spasticity. International Journal of Neuroscience.  
44 2014;124(9):652-6.  
45
- 46 40. Kolansky H, Moore WT. Toxic effects of chronic marihuana use. JAMA. 1972;222(1):35-41.  
47
- 48 41. Krcevski-Skvarc N, Wells C, Hauser W. Availability and approval of cannabis-based medicines for  
49 chronic pain management and palliative/supportive care in Europe: A survey of the status in the  
50 chapters of the European Pain Federation. European Journal of Pain. 2018;22(3):440-54.  
51  
52  
53  
54  
55  
56  
57  
58  
59  
60

- 1  
2  
3 42. Lagae L, Schoonjans AS, Gammaitoni AR, Galer BS, Ceulemans B. A pilot, open-label study of the  
4 effectiveness and tolerability of low-dose ZX008 (fenfluramine HCl) in Lennox-Gastaut syndrome.  
5 *Epilepsia*. 2018;59(10):1881-8.  
6  
7 43. Laux LC, Bebin EM, Checketts D, Chez M, Flamini R, Marsh ED, et al. Long-term safety and  
8 efficacy of cannabidiol in children and adults with treatment-resistant Lennox-Gastaut syndrome or  
9 Dravet syndrome: Expanded access program results. *Epilepsy Research*. 2019;154:13-20.  
10  
11 44. Leconte M, Nicco C, Ngo C, Arkwright S, Chereau C, Guibourdenche J, et al. Antiproliferative  
12 effects of cannabinoid agonists on deep infiltrating endometriosis. *American Journal of Pathology*.  
13 2010;177(6):2963-70.  
14  
15 45. Liebrechts N, Benschop A, van der Pol P, Van Laar M, De Graaf R, Van den Brink W, et al. Cannabis  
16 dependence and peer selection in social networks of frequent users. *Contemporary Drug Problems: An*  
17 *Interdisciplinary Quarterly*. 2011;38(1):93-120.  
18  
19 46. Lim M, Kirchoff MG. Dermatology-Related Uses of Medical Cannabis Promoted by Dispensaries  
20 in Canada, Europe, and the United States. *Journal of Cutaneous Medicine & Surgery*. 2019;23(2):178-84.  
21  
22 47. Lorente Fernandez L, Monte Boquet E, Perez-Mirallas F, Gil Gomez I, Escutia Roig M, Bosca  
23 Blasco I, et al. Clinical experiences with cannabinoids in spasticity management in multiple sclerosis.  
24 [Spanish]. *Neurologia*. 2014;29(5):257-60.  
25  
26 48. Lockett T, Phillips J, Lintzeris N, Allsop D, Lee J, Solowij N, et al. Clinical trials of medicinal  
27 cannabis for appetite-related symptoms from advanced cancer: a survey of preferences, attitudes and  
28 beliefs among patients willing to consider participation. *Internal Medicine Journal*. 2016;46(11):1269-75.  
29  
30 49. Marcellin F, Lions C, Rosenthal E, Roux P, Sogni P, Wittkop L, et al. No significant effect of  
31 cannabis use on the count and percentage of circulating CD4 T-cells in HIV-HCV co-infected patients  
32 (ANRS CO13-HEPAVIH French cohort). *Drug & Alcohol Review*. 2017;36(2):227-38.  
33  
34 50. McCabe SE, West BT, Veliz P, Frank KA, Boyd CJ. Social contexts of substance use among U.S.  
35 high school seniors: A multicohort national study. *Journal of Adolescent Health*. 2014;55(6):842-4.  
36  
37 51. Michalski CW, Laukert T, Sauliunaite D, Pacher P, Bergmann F, Agarwal N, et al. Cannabinoids  
38 ameliorate pain and reduce disease pathology in cerulein-induced acute pancreatitis. *Gastroenterology*.  
39 2007;132(5):1968-78.  
40  
41 52. Milloy MJ, Marshall B, Kerr T, Richardson L, Hogg R, Guillemi S, et al. High-intensity cannabis use  
42 associated with lower plasma human immunodeficiency virus-1 RNA viral load among recently infected  
43 people who use injection drugs. *Drug & Alcohol Review*. 2015;34(2):135-40.  
44  
45 53. Mitelpunkt A, Kramer U, Hausman Kedem M, Zilbershot Fink E, Orbach R, Chernuha V, et al. The  
46 safety, tolerability, and effectiveness of PTL-101, an oral cannabidiol formulation, in pediatric intractable  
47 epilepsy: A phase II, open-label, single-center study. *Epilepsy and Behavior*. 2019;Part A. 98:233-7.  
48  
49 54. Mousa A, Petrovic M, Fleshner NE. Prevalence and predictors of cannabis use among men  
50 receiving androgen-deprivation therapy for advanced prostate cancer. *Canadian Urological Association*  
51 *Journal*. 2020;14(1):E20-E6.  
52  
53  
54  
55  
56  
57  
58  
59  
60

- 1  
2  
3 55. Nordmann S, Vilotitch A, Roux P, Esterle L, Spire B, Marcellin F, et al. Daily cannabis and reduced  
4 risk of steatosis in human immunodeficiency virus and hepatitis C virus-co-infected patients (ANRS  
5 CO13-HEPAVIH). *Journal of Viral Hepatitis*. 2018;25(2):171-9.  
6  
7 56. Notcutt WG. A questionnaire survey of patients and carers of patients prescribed Sativex as an  
8 unlicensed medicine. *Primary Health Care Research & Development*. 2013;14(2):192-9.  
9  
10 57. Novotna A, Mares J, Ratcliffe S, Novakova I, Vachova M, Zapletalova O, et al. A randomized,  
11 double-blind, placebo-controlled, parallel-group, enriched-design study of nabiximols (Sativex( R) ), as  
12 add-on therapy, in subjects with refractory spasticity caused by multiple sclerosis. *European Journal of*  
13 *Neurology*. 2011;18(9):1122-31.  
14  
15 58. Ofir R, Bar-Sela G, Weyl Ben-Arush M, Postovsky S. Medical marijuana use for pediatric oncology  
16 patients: single institution experience. *Pediatric Hematology & Oncology*. 2019;36(5):255-66.  
17  
18 59. Palmieri B, Laurino C, Vadala M. A therapeutic effect of cbd-enriched ointment in inflammatory  
19 skin diseases and cutaneous scars. *Clinica Terapeutica*. 2019;170(2):e93-e9.  
20  
21 60. Paolicelli D, Direnzo V, Manni A, D'Onghia M, Tortorella C, Zoccollella S, et al. Long-Term Data of  
22 Efficacy, Safety, and Tolerability in a Real-Life Setting of THC/CBD Oromucosal Spray-Treated Multiple  
23 Sclerosis Patients. *Journal of Clinical Pharmacology*. 2016;56(7):845-51.  
24  
25 61. Patel VP, Feinstein A. Cannabis and cognitive functioning in multiple sclerosis: The role of  
26 gender. *Multiple Sclerosis Journal Experimental Translational & Clinical*. 2017;3(2):2055217317713027.  
27  
28 62. Patti F. Health Authorities Data Collection of THC:CBD Oromucosal Spray (L'Agenzia Italiana del  
29 Farmaco Web Registry): Figures after 1.5 Years. *European Neurology*. 2016;75 Suppl 1:9-12.  
30  
31 63. Patti F, Messina S, Solaro C, Amato MP, Bergamaschi R, Bonavita S, et al. Efficacy and safety of  
32 cannabinoid oromucosal spray for multiple sclerosis spasticity. *Journal of Neurology, Neurosurgery &*  
33 *Psychiatry*. 2016;87(9):944-51.  
34  
35 64. Pavisian B, MacIntosh BJ, Szilagyi G, Staines RW, O'Connor P, Feinstein A. Effects of cannabis on  
36 cognition in patients with MS: a psychometric and MRI study. *Neurology*. 2014;82(21):1879-87.  
37  
38 65. Punzo F, Tortora C, Di Pinto D, Pota E, Argenziano M, Di Paola A, et al. Bortezomib and  
39 endocannabinoid/endovanilloid system: a synergism in osteosarcoma. *Pharmacological Research*.  
40 2018;137:25-33.  
41  
42 66. Purcell C, Davis A, Moolman N, Taylor SM. Reduction of Benzodiazepine Use in Patients  
43 Prescribed Medical Cannabis. *Cannabis and Cannabinoid Research*. 2019;4(3):214-8.  
44  
45 67. Radke PM, Mokhtarzadeh A, Lee MS, Harrison AR. Medical Cannabis, a Beneficial High in  
46 Treatment of Blepharospasm? An Early Observation. *Neuro-Ophthalmology*. 2017;41(5):253-8.  
47  
48 68. Romero K, Pavisian B, Staines WR, Feinstein A. Multiple sclerosis, cannabis, and cognition: A  
49 structural MRI study. *NeuroImage Clinical*. 2015;8:140-7.  
50  
51 69. Russo M, Calabro RS, Naro A, Sessa E, Rifichi C, D'Aleo G, et al. Sativex in the Management of  
52 Multiple Sclerosis-Related Spasticity: Role of the Corticospinal Modulation. *Neural Plasticity*. 2015;2015  
53 (no pagination)(656582).  
54  
55  
56  
57  
58  
59  
60

- 1  
2  
3 70. Sarnelli G, D'Alessandro A, Iuvone T, Capoccia E, Gigli S, Pesce M, et al. Palmitoylethanolamide  
4 Modulates Inflammation-Associated Vascular Endothelial Growth Factor (VEGF) Signaling via the  
5 Akt/mTOR Pathway in a Selective Peroxisome Proliferator-Activated Receptor Alpha (PPAR-alpha)-  
6 Dependent Manner. *PLoS ONE [Electronic Resource]*. 2016;11(5):e0156198.  
7  
8 71. Savage TE, Sourbron J, Bruno PL, Skirvin LA, Wolper ES, Anagnos CJ, et al. Efficacy of cannabidiol  
9 in subjects with refractory epilepsy relative to concomitant use of clobazam. *Epilepsy Research*.  
10 2020;160 (no pagination)(106263).  
11  
12 72. Schabas AJ, Vukojevic V, Taylor C, Thu Z, Badyal A, Chan JK, et al. Cannabis-based product use in  
13 a multiple sclerosis cohort. *Multiple Sclerosis Journal Experimental Translational & Clinical*.  
14 2019;5(3):2055217319869360.  
15  
16 73. Stillman M, Capron M, Mallow M, Ransom T, Gustafson K, Bell A, et al. Utilization of medicinal  
17 cannabis for pain by individuals with spinal cord injury. *Spinal Cord Series and Cases*. 2019;5:66.  
18  
19 74. Swift W, Gates P, Dillon P. Survey of Australians using cannabis for medical purposes. *Harm*  
20 *Reduction Journal*. 2005;2:18.  
21  
22 75. Sylvestre DL, Clements BJ, Malibu Y. Cannabis use improves retention and virological outcomes  
23 in patients treated for hepatitis C. *European Journal of Gastroenterology & Hepatology*.  
24 2006;18(10):1057-63.  
25  
26 76. Tyree GA, Sarkar R, Bellows BK, Ellis RJ, Atkinson JH, Marcotte TD, et al. A Cost-Effectiveness  
27 Model for Adjunctive Smoked Cannabis in the Treatment of Chronic Neuropathic Pain. *Cannabis and*  
28 *Cannabinoid Research*. 2019;4(1):62-72.  
29  
30 77. Vermersch P, Trojano M. Tetrahydrocannabinol:Cannabidiol Oromucosal Spray for Multiple  
31 Sclerosis-Related Resistant Spasticity in Daily Practice. *European Neurology*. 2016;76(5-6):216-26.  
32  
33 78. Vidot DC, Lerner B, Gonzalez R. Cannabis Use, Medication Management and Adherence Among  
34 Persons Living with HIV. *AIDS & Behavior*. 2017;21(7):2005-13.  
35  
36 79. Voon P, Hayashi K, Milloy MJ, Nguyen P, Wood E, Montaner J, et al. Pain Among High-Risk  
37 Patients on Methadone Maintenance Treatment. *Journal of Pain*. 2015;16(9):887-94.  
38  
39 80. Wade DT, Makela PM, House H, Bateman C, Robson P. Long-term use of a cannabis-based  
40 medicine in the treatment of spasticity and other symptoms in multiple sclerosis. *Multiple Sclerosis*.  
41 2006;12(5):639-45.  
42  
43 81. Waissengrin B, Urban D, Leshem Y, Garty M, Wolf I. Patterns of use of medical cannabis among  
44 Israeli cancer patients: a single institution experience. *Journal of Pain & Symptom Management*.  
45 2015;49(2):223-30.  
46  
47 82. Walsh Z, Callaway R, Belle-Isle L, Capler R, Kay R, Lucas P, et al. Cannabis for therapeutic  
48 purposes: patient characteristics, access, and reasons for use. *International Journal of Drug Policy*.  
49 2013;24(6):511-6.  
50  
51 83. Ware MA, Rueda S, Singer J, Kilby D. Cannabis use by persons living with HIV/AIDS: Patterns and  
52 prevalence of use. *Journal of Cannabis Therapeutics*. 2003;3(2):3-15.  
53  
54  
55  
56  
57  
58  
59  
60



- 1  
2  
3 84. Witt CM, Berling NEJ, Rinpoche NT, Cuomo M, Willich SN. Evaluation of medicinal plants as part  
4 of Tibetan medicine prospective observational study in Sikkim and Nepal. *Journal of Alternative and*  
5 *Complementary Medicine*. 2009;15(1):59-65.  
6  
7 85. Woolridge E, Barton S, Samuel J, Osorio J, Dougherty A, Holdcroft A. Cannabis use in HIV for pain  
8 and other medical symptoms. *Journal of Pain & Symptom Management*. 2005;29(4):358-67.  
9  
10 86. Zhang H, Xie M, Levin M, Archibald SD, Jackson BS, Young JEM, et al. Survival outcomes of  
11 marijuana users in p16 positive oropharynx cancer patients. *Journal of Otolaryngology: Head and Neck*  
12 *Surgery*. 2019;48(1):43.  
13  
14

#### 15 **Study did not report on medical cannabis**

- 16  
17 1. Brenton JN, Schreiner T, Karoscik K, Richter M, Ferrante S, Waldman A, et al. Attitudes,  
18 perceptions, and use of marijuana in youth with multiple sclerosis. *Journal of Neurology*.  
19 2018;265(2):417-23.  
20  
21 2. Chirchiglia D, Paventi S, Seminara P, Cione E, Gallelli L. N-Palmitoyl Ethanol Amide  
22 Pharmacological Treatment in Patients With Nonsurgical Lumbar Radiculopathy. *Journal of Clinical*  
23 *Pharmacology*. 2018;58(6):733-9.  
24  
25 3. Coates MD, Soriano C, Dalessio S, Stuart A, Walter V, Koltun W, et al. Gastrointestinal  
26 hypoalgesia in inflammatory bowel disease. *Annals of Gastroenterology*. 2020;33(1):45-52.  
27  
28 4. Cooke AC, Knight KR, Miaskowski C. Patients' and clinicians' perspectives of co-use of cannabis  
29 and opioids for chronic non-cancer pain management in primary care. *International Journal of Drug*  
30 *Policy*. 2019;63:23-8.  
31  
32 5. Costiniuk CT, Saneei Z, Salahuddin S, Cox J, Routy JP, Rueda S, et al. Cannabis Consumption in  
33 People Living with HIV: Reasons for Use, Secondary Effects, and Opportunities for Health Education.  
34 *Cannabis and Cannabinoid Research*. 2019;4(3):204-13.  
35  
36 6. Cuomo A, Russo G, Esposito G, Forte CA, Connola M, Marcassa C. Efficacy and gastrointestinal  
37 tolerability of oral oxycodone/naloxone combination for chronic pain in outpatients with cancer: An  
38 observational study. *American Journal of Hospice & Palliative Medicine*. 2014;31(8):867-76.  
39  
40 7. Finnerup NB, Norrbrink C, Trok K, Piehl F, Johannesen IL, Sorensen JC, et al. Phenotypes and  
41 predictors of pain following traumatic spinal cord injury: A prospective study. *Journal of Pain*.  
42 2014;15(1):40-8.  
43  
44 8. Gallagher R, Best JA, Fyles G, Hawley P, Yeomans W. Attitudes and beliefs about the use of  
45 Cannabis for symptom control in a palliative population. *Journal of Cannabis Therapeutics*. 2003;3(2):41-  
46 50.  
47  
48 9. Gill A, Williams AC. Preliminary study of chronic pain patients' concerns about cannabinoids as  
49 analgesics. *Clinical Journal of Pain*. 2001;17(3):245-8.  
50  
51 10. Habib G, Avisar I. The Consumption of Cannabis by Fibromyalgia Patients in Israel. *Pain Research*  
52 *and Treatment*. 2018;2018:7829427.  
53  
54  
55  
56  
57  
58  
59  
60

11. Harder S, Groenvold M, Isaksen J, Sigaard J, Frandsen KB, Neergaard MA, et al. Antiemetic use of olanzapine in patients with advanced cancer: results from an open-label multicenter study. *Supportive Care in Cancer*. 2019;27(8):2849-56.
12. Hefner K, Sofuoglu M, Rosenheck R. Concomitant cannabis abuse/dependence in patients treated with opioids for non-cancer pain. *American Journal on Addictions*. 2015;24(6):538-45.
13. Johnson JR, Lossignol D, Burnell-Nugent M, Fallon MT. An open-label extension study to investigate the long-term safety and tolerability of THC/CBD oromucosal spray and oromucosal THC spray in patients with terminal cancer-related pain refractory to strong opioid analgesics. *Journal of Pain & Symptom Management*. 2013;46(2):207-18.
14. Lal S, Prasad N, Ryan M, Tangri S, Silverberg MS, Gordon A, et al. Cannabis use amongst patients with inflammatory bowel disease. *European Journal of Gastroenterology & Hepatology*. 2011;23(10):891-6.
15. Mai LM, Clark AJ, Gordon AS, Lynch ME, Morley-Forster PK, Nathan H, et al. Long-Term Outcomes in the Management of Painful Diabetic Neuropathy. *Canadian Journal of Neurological Sciences*. 2017;44(4):337-42.
16. Noyes R, Jr., Brunk SF, Avery DA, Canter AC. The analgesic properties of delta-9-tetrahydrocannabinol and codeine. *Clinical Pharmacology & Therapeutics*. 1975;18(1):84-9.
17. Pezzilli R, Ciuffreda P, Ottria R, Ravelli A, Melzi d'Eril G, Barassi A. Serum endocannabinoids in assessing pain in patients with chronic pancreatitis and in those with pancreatic ductal adenocarcinoma. *Scandinavian Journal of Gastroenterology*. 2017;52(10):1133-9.
18. Rogers AH, Shepherd JM, Paulus DJ, Orr MF, Ditre JW, Bakhshaie J, et al. The Interaction of Alcohol Use and Cannabis Use Problems in Relation to Opioid Misuse Among Adults with Chronic Pain. *International Journal of Behavioral Medicine*. 2019;26(5):569-75.
19. Shiplo S, Asbridge M, Leatherdale ST, Hammond D. Medical cannabis use in Canada: Vapourization and modes of delivery. *Harm Reduction Journal*. 2016;13 (1) (no pagination)(30).
20. Ste-Marie PA, Shir Y, Rampakakis E, Sampalis JS, Karellis A, Cohen M, et al. Survey of herbal cannabis (marijuana) use in rheumatology clinic attenders with a rheumatologist confirmed diagnosis. *Pain*. 2016;157(12):2792-7.
21. Stein MD, Herman DS, Bailey GL, Straus J, Anderson BJ, Uebelacker LA, et al. Chronic pain and depression among primary care patients treated with buprenorphine. *Journal of General Internal Medicine*. 2015;30(7):935-41.
22. Stillman M, Mallow M, Ransom T, Gustafson K, Bell A, Graves D. Attitudes toward and knowledge of medical cannabis among individuals with spinal cord injury. *Spinal Cord Series and Cases*. 2019;5:6.
23. Tripp DA, Nickel JC, Katz L, Krsmanovic A, Ware MA, Santor D. A survey of cannabis (marijuana) use and self-reported benefit in men with chronic prostatitis/chronic pelvic pain syndrome. *Canadian Urological Association Journal*. 2014;8(11-12):E901-5.

1  
2  
3 24. Weinkle L, Domen CH, Shelton I, Sillau S, Nair K, Alvarez E. Exploring cannabis use by patients  
4 with multiple sclerosis in a state where cannabis is legal. *Multiple Sclerosis and Related Disorders*.  
5 2019;27:383-90.  
6

7 25. Weinrieb RM, Barnett R, Lynch KG, DePiano M, Atanda A, Olthoff KM. A matched comparison  
8 study of medical and psychiatric complications and anesthesia and analgesia requirements in  
9 methadone-maintained liver transplant recipients. *Liver Transplantation*. 2004;10(1):97-106.  
10

### 11 **Study did not report on harms or adverse events**

12  
13 1. Aggarwal S, Carter G, Sullivan M, Zumbrennen C, Morrill R, Mayer J. Prospectively surveying  
14 health-related quality of life and symptom relief in a lot-based sample of medical cannabis-using  
15 patients in urban Washington State reveals managed chronic illness and debility. *American Journal of*  
16 *Hospice & Palliative Medicine*. 2013;30(6):523-31.  
17  
18

19 2. Ashrafioun L, Bohnert KM, Jannausch M, Ilgen MA. Characteristics of substance use disorder  
20 treatment patients using medical cannabis for pain. *Addictive Behaviors*. 2015;42:185-8.  
21

22 3. Bigand T, Anderson CL, Roberts ML, Shaw MR, Wilson M. Benefits and adverse effects of  
23 cannabis use among adults with persistent pain. *Nursing Outlook*. 2019;67(3):223-31.  
24

25 4. Boehnke KF, Litinas E, Clauw DJ. Medical Cannabis Use Is Associated With Decreased Opiate  
26 Medication Use in a Retrospective Cross-Sectional Survey of Patients With Chronic Pain. *Journal of Pain*.  
27 2016;17(6):739-44.  
28

29 5. Boehnke KF, Scott JR, Litinas E, Sisley S, Williams DA, Clauw DJ. Pills to Pot: Observational  
30 Analyses of Cannabis Substitution Among Medical Cannabis Users With Chronic Pain. *Journal of Pain*.  
31 2019;20(7):830-41.  
32  
33

34 6. Capano A, Weaver R, Burkman E. Evaluation of the effects of CBD hemp extract on opioid use  
35 and quality of life indicators in chronic pain patients: a prospective cohort study. *Postgraduate*  
36 *Medicine*. 2020;132(1):56-61.  
37

38 7. Consroe P, Musty R, Rein J, Tillery W, Pertwee R. The perceived effects of smoked cannabis on  
39 patients with multiple sclerosis. *European Neurology*. 1997;38(1):44-8.  
40

41 8. Cranford JA, Bohnert KM, Perron BE, Bourque C, Ilgen M. Prevalence and correlates of "Vaping"  
42 as a route of cannabis administration in medical cannabis patients. *Drug and Alcohol Dependence*.  
43 2016;169:41-7.  
44

45 9. Curtis SA, Spodick J, Lew D, Roberts JD. Medical marijuana certification for patients with sickle  
46 cell disease: A survey study of patient's use and preferences. *Blood Conference: 60th Annual Meeting of*  
47 *the American Society of Hematology, ASH*. 2018;132(Suppl. 1).  
48  
49

50 10. Davis AK, Walton MA, Bohnert KM, Bourque C, Ilgen MA. Factors associated with alcohol  
51 consumption among medical cannabis patients with chronic pain. *Addictive Behaviors*. 2018;77:166-71.  
52

53 11. Donovan KA, Oberoi-Jassal R, Chang YD, Rajasekhara S, Haas MF, Randich AL, et al. Cannabis Use  
54 in Young Adult Cancer Patients. *Journal of Adolescent & Young Adult Oncology*. 2020;9(1):30-5.  
55  
56  
57

12. Drossel C, Forchheimer M, Meade MA. Characteristics of Individuals with Spinal Cord Injury Who Use Cannabis for Therapeutic Purposes. *Topics in Spinal Cord Injury Rehabilitation*. 2016;22(1):3-12.
13. Ehde DM, Alschuler KN, Osborne TL, Hanley MA, Jensen MP, Kraft GH. Utilization and patients' perceptions of the effectiveness of pain treatments in multiple sclerosis: A cross-sectional survey. *Disability & Health Journal*. 2015;8(3):452-6.
14. Gras A, Broughton J. A cost-effectiveness model for the use of a cannabis-derived oromucosal spray for the treatment of spasticity in multiple sclerosis. *Expert Review of Pharmacoeconomics and Outcomes Research*. 2016;16(6):771-9.
15. Jehangir A, Parkman HP. Cannabinoid Use in Patients With Gastroparesis and Related Disorders: Prevalence and Benefit. *American Journal of Gastroenterology*. 2019;114(6):945-53.
16. Kindred JH, Li K, Ketelhut NB, Proessl F, Fling BW, Honce JM, et al. Cannabis use in people with Parkinson's disease and Multiple Sclerosis: A web-based investigation. *Complementary Therapies in Medicine*. 2017;33:99-104.
17. Lake S, Walsh Z, Kerr T, Cooper ZD, Buxton J, Wood E, et al. Frequency of cannabis and illicit opioid use among people who use drugs and report chronic pain: A longitudinal analysis. *PLoS Medicine / Public Library of Science*. 2019;16(11):e1002967.
18. Li X, Vigil JM, Stith SS, Brockelman F, Keeling K, Hall B. The effectiveness of self-directed medical cannabis treatment for pain. *Complementary Therapies in Medicine*. 2019;46:123-30.
19. Lucas P, Baron EP, Jikomes N. Medical cannabis patterns of use and substitution for opioids & other pharmaceutical drugs, alcohol, tobacco, and illicit substances; Results from a cross-sectional survey of authorized patients. *Harm Reduction Journal Vol 16 2019, ArtID 9*. 2019;16.
20. Mallada Frechin J. Effect of tetrahydrocannabinol:cannabidiol oromucosal spray on activities of daily living in multiple sclerosis patients with resistant spasticity: a retrospective, observational study. *Neurodegenerative Disease Management*. 2018;8(3):151-9.
21. Marinelli L, Mori L, Canneva S, Colombano F, Curra A, Fattapposta F, et al. The effect of cannabinoids on the stretch reflex in multiple sclerosis spasticity. *International Clinical Psychopharmacology*. 2016;31(4):232-9.
22. Mbachii C, Attar B, Oyenubi O, Yuchen W, Efesomwan A, Paintsil I, et al. Association between cannabis use and complications related to ulcerative colitis in hospitalized patients: A propensity matched retrospective cohort study. *Medicine*. 2019;98(32):e16551.
23. Mbachii C, Attar B, Wang Y, Paintsil I, Mba B, Fugar S, et al. Association Between Cannabis Use and Complications Related to Crohn's Disease: A Retrospective Cohort Study. *Digestive Diseases & Sciences*. 2019;64(10):2939-44.
24. Mercurio A, Aston ER, Claborn KR, Wayne K, Rosen RK. Marijuana as a substitute for prescription medications: A qualitative study. *Substance Use & Misuse*. 2019;54(11):1894-902.

- 1  
2  
3 25. Merker AM, Riaz M, Friedman S, Allegretti JR, Korzenik J. Legalization of Medicinal Marijuana  
4 Has Minimal Impact on Use Patterns in Patients With Inflammatory Bowel Disease. *Inflammatory Bowel*  
5 *Diseases*. 2018;24(11):2309-14.  
6
- 7 26. Messina S, Solaro C, Righini I, Bergamaschi R, Bonavita S, Bossio RB, et al. Sativex in resistant  
8 multiple sclerosis spasticity: Discontinuation study in a large population of Italian patients (SA.FE. study).  
9 *PLoS ONE [Electronic Resource]*. 2017;12(8):e0180651.  
10
- 11 27. Meyer T, Funke A, Munch C, Kettemann D, Maier A, Walter B, et al. Real world experience of  
12 patients with amyotrophic lateral sclerosis (ALS) in the treatment of spasticity using  
13 tetrahydrocannabinol:cannabidiol (THC:CBD). *BMC Neurology*. 2019;19(1):222.  
14
- 15 28. Michalski CW, Oti FE, Erkan M, Sauliunaite D, Bergmann F, Pacher P, et al. Cannabinoids in  
16 pancreatic cancer: Correlation with survival and pain. *International Journal of Cancer*. 2008;122(4):742-  
17 50.  
18
- 19 29. Naftali T, Lev LB, Yablecovitch D, Half E, Konikoff FM. Treatment of Crohn's disease with  
20 cannabis: an observational study. *Israel Medical Association Journal: Imaj*. 2011;13(8):455-8.  
21
- 22 30. Page SA, Verhoef MJ, Stebbins RA, Metz LM, Levy JC. Cannabis use as described by people with  
23 multiple sclerosis. *Canadian Journal of Neurological Sciences*. 2003;30(3):201-5.  
24
- 25 31. Perron BE, Bohnert K, Perone AK, Bonn-Miller MO, Ilgen M. Use of prescription pain medications  
26 among medical cannabis patients: comparisons of pain levels, functioning, and patterns of alcohol and  
27 other drug use. *Journal of Studies on Alcohol & Drugs*. 2015;76(3):406-13.  
28
- 29 32. Piper BJ, Dekeuster RM, Beals ML, Cobb CM, Burchman CA, Perkinson L, et al. Substitution of  
30 medical cannabis for pharmaceutical agents for pain, anxiety, and sleep. *Journal of*  
31 *Psychopharmacology*. 2017;31(5):569-75.  
32
- 33 33. Reiman A, Welty M, Solomon P. Cannabis as a Substitute for Opioid-Based Pain Medication:  
34 Patient Self-Report. *Cannabis and Cannabinoid Research*. 2017;2(1):160-6.  
35
- 36 34. Rochford C, Edgeworth D, Hashim M, Harmon D. Attitudes of Irish patients with chronic pain  
37 towards medicinal cannabis. *Irish Journal of Medical Science*. 2019;188(1):267-72.  
38
- 39 35. Russo M, De Luca R, Torrisi M, Rifici C, Sessa E, Bramanti P, et al. Should we care about sativex-  
40 induced neurobehavioral effects? A 6-month follow-up study. *European Review for Medical &*  
41 *Pharmacological Sciences*. 2016;20(14):3127-33.  
42
- 43 36. Saadeh CE, Rustem DR. Medical Marijuana Use in a Community Cancer Center. *Journal of*  
44 *oncology practice/American Society of Clinical Oncology*. 2018;14(9):e566-e78.  
45
- 46 37. Spencer N, Shaw E, Slaven M. Medical cannabis use in an outpatient palliative care clinic: A  
47 retrospective chart review. *Journal of Pain Management*. 2016;9(4):507-13.  
48
- 49 38. Ste-Marie PA, Fitzcharles MA, Gamsa A, Ware MA, Shir Y. Association of herbal cannabis use  
50 with negative psychosocial parameters in patients with fibromyalgia. *Arthritis care & research*.  
51 2012;64(8):1202-8.  
52  
53  
54  
55  
56  
57  
58  
59  
60

- 1  
2  
3 39. Sznitman SR, Goldberg V, Sheinman-Yuffe H, Flechter E, Bar-Sela G. Storage and disposal of  
4 medical cannabis among patients with cancer: Assessing the risk of diversion and unintentional  
5 digestion. *Cancer*. 2016;122(21):3363-70.  
6  
7 40. Victorson D, McMahon M, Horowitz B, Glickson S, Parker B, Mendoza-Temple L. Exploring  
8 cancer survivors' attitudes, perceptions, and concerns about using medical cannabis for symptom and  
9 side effect management: A qualitative focus group study. *Complementary Therapies in Medicine*.  
10 2019;47:102204.  
11  
12 41. Ware MA, Adams H, Guy GW. The medicinal use of cannabis in the UK: results of a nationwide  
13 survey. *International Journal of Clinical Practice*. 2005;59(3):291-5.  
14  
15 42. Ware MA, Martel MO, Jovey R, Lynch ME, Singer J. A prospective observational study of  
16 problematic oral cannabinoid use. *Psychopharmacology*. 2018;235(2):409-17.  
17  
18

19 **Study included <25 patients**

- 20  
21 1. Apel A, Greim B, Zettl UK. How frequently do patients with multiple sclerosis use  
22 complementary and alternative medicine? *Complementary Therapies in Medicine*. 2005;13(4):258-63.  
23  
24 2. Mondello E, Quattrone D, Cardia L, Bova G, Mallamace R, Barbagallo AA, et al. Cannabinoids and  
25 spinal cord stimulation for the treatment of failed back surgery syndrome refractory pain. *Journal of*  
26 *Pain Research*. 2018;11:1761-7.  
27  
28 3. Toth C, Au S. A prospective identification of neuropathic pain in specific chronic polyneuropathy  
29 syndromes and response to pharmacological therapy. *Pain*. 2008;138(3):657-66.  
30  
31  
32  
33  
34  
35  
36  
37  
38  
39  
40  
41  
42  
43  
44  
45  
46  
47  
48  
49  
50  
51  
52  
53  
54  
55  
56  
57  
58  
59  
60

**Appendix 5: Risk of bias ratings**

| Study                   | Confounding | Selection of participants into the study | Classification of the intervention | Departures from the intended intervention | Missing data | Measurement of outcomes | Selection of the reported Results |
|-------------------------|-------------|------------------------------------------|------------------------------------|-------------------------------------------|--------------|-------------------------|-----------------------------------|
| Ware, 2003              | ●           | ●                                        | ●                                  | ●                                         | ●            | ●                       | ●                                 |
| Lynch, 2006             | ●           | ●                                        | ●                                  | ●                                         | ●            | ●                       | ●                                 |
| Rog, 2007               | ●           | ●                                        | ●                                  | ●                                         | ●            | ●                       | ●                                 |
| Weber, 2009             | ●           | ●                                        | ●                                  | ●                                         | ●            | ●                       | ●                                 |
| Bestard, 2011*          | ●           | ●                                        | ●                                  | ●                                         | ●            | ●                       | ●                                 |
| Fiz, 2011               | ●           | ●                                        | ●                                  | ●                                         | ●            | ●                       | ●                                 |
| Dominguez, 2012         | ●           | ●                                        | ●                                  | ●                                         | ●            | ●                       | ●                                 |
| Gatti, 2012             | ●           | ●                                        | ●                                  | ●                                         | ●            | ●                       | ●                                 |
| Toth, 2012              | ●           | ●                                        | ●                                  | ●                                         | ●            | ●                       | ●                                 |
| Schifilliti, 2014       | ●           | ●                                        | ●                                  | ●                                         | ●            | ●                       | ●                                 |
| Storr, 2014             | ●           | ●                                        | ●                                  | ●                                         | ●            | ●                       | ●                                 |
| Del Giorno, 2015        | ●           | ●                                        | ●                                  | ●                                         | ●            | ●                       | ●                                 |
| Hoggart, 2015           | ●           | ●                                        | ●                                  | ●                                         | ●            | ●                       | ●                                 |
| Ware, 2015†             | ●           | ●                                        | ●                                  | ●                                         | ●            | ●                       | ●                                 |
| Haroutounian, 2016      | ●           | ●                                        | ●                                  | ●                                         | ●            | ●                       | ●                                 |
| Bellnier, 2017          | ●           | ●                                        | ●                                  | ●                                         | ●            | ●                       | ●                                 |
| Cranford, 2017          | ●           | ●                                        | ●                                  | ●                                         | ●            | ●                       | ●                                 |
| Fanelli, 2017           | ●           | ●                                        | ●                                  | ●                                         | ●            | ●                       | ●                                 |
| Feingold, 2017          | ●           | ●                                        | ●                                  | ●                                         | ●            | ●                       | ●                                 |
| Paladini, 2017          | ●           | ●                                        | ●                                  | ●                                         | ●            | ●                       | ●                                 |
| Passavanti, 2017        | ●           | ●                                        | ●                                  | ●                                         | ●            | ●                       | ●                                 |
| Schimrigk, 2017         | ●           | ●                                        | ●                                  | ●                                         | ●            | ●                       | ●                                 |
| Chirchiglia, 2018       | ●           | ●                                        | ●                                  | ●                                         | ●            | ●                       | ●                                 |
| Crowley, 2018           | ●           | ●                                        | ●                                  | ●                                         | ●            | ●                       | ●                                 |
| Habib, 2018             | ●           | ●                                        | ●                                  | ●                                         | ●            | ●                       | ●                                 |
| Anderson, 2019          | ●           | ●                                        | ●                                  | ●                                         | ●            | ●                       | ●                                 |
| Bonar, 2019             | ●           | ●                                        | ●                                  | ●                                         | ●            | ●                       | ●                                 |
| Cervigni, 2019          | ●           | ●                                        | ●                                  | ●                                         | ●            | ●                       | ●                                 |
| Cremer-Schaeffer, 2019‡ | ●           | ●                                        | ●                                  | ●                                         | ●            | ●                       | ●                                 |
| Lejczak, 2019           | ●           | ●                                        | ●                                  | ●                                         | ●            | ●                       | ●                                 |
| Loi, 2019               | ●           | ●                                        | ●                                  | ●                                         | ●            | ●                       | ●                                 |
| Naftali, 2019           | ●           | ●                                        | ●                                  | ●                                         | ●            | ●                       | ●                                 |
| Perron, 2019            | ●           | ●                                        | ●                                  | ●                                         | ●            | ●                       | ●                                 |
| Sagy, 2019              | ●           | ●                                        | ●                                  | ●                                         | ●            | ●                       | ●                                 |
| Sinclair, 2019          | ●           | ●                                        | ●                                  | ●                                         | ●            | ●                       | ●                                 |
| Ueberall, 2019          | ●           | ●                                        | ●                                  | ●                                         | ●            | ●                       | ●                                 |
| Vigil, 2019             | ●           | ●                                        | ●                                  | ●                                         | ●            | ●                       | ●                                 |
| Yassin, 2019            | ●           | ●                                        | ●                                  | ●                                         | ●            | ●                       | ●                                 |
| Giorgi, 2020            | ●           | ●                                        | ●                                  | ●                                         | ●            | ●                       | ●                                 |

|                       |   |
|-----------------------|---|
| Low risk of bias      | ● |
| Moderate risk of bias | ● |
| Serious risk of bias  | ● |
| Critical risk of bias | ● |

\* Risk of bias for confounding for comparative results were rated as serious.

† Risk of bias for confounding for unadjusted comparative comparative results were rated as serious. Adjusted comparative results were rated as moderate.

‡ The study reported on dronabinol, nabiximols, and herbal cannabis separately. The results for herbal cannabis were at serious risk of selection bias due to prior herbal cannabis use among participants.

**Appendix 6: Results for all adverse events (subgroup by design)**

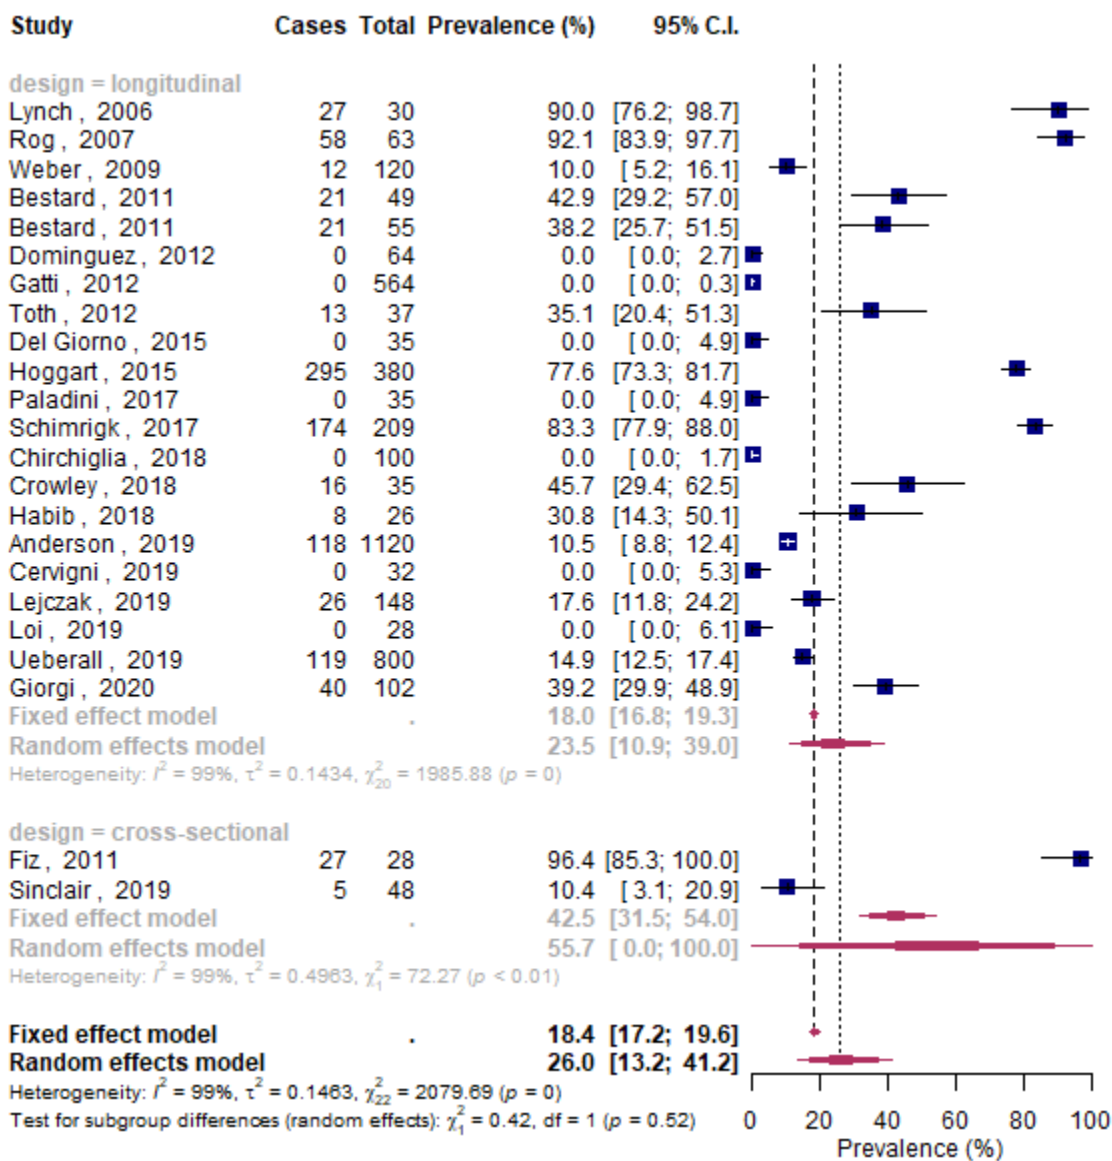



**Appendix 7: Results for all adverse events (subgroup by duration)**

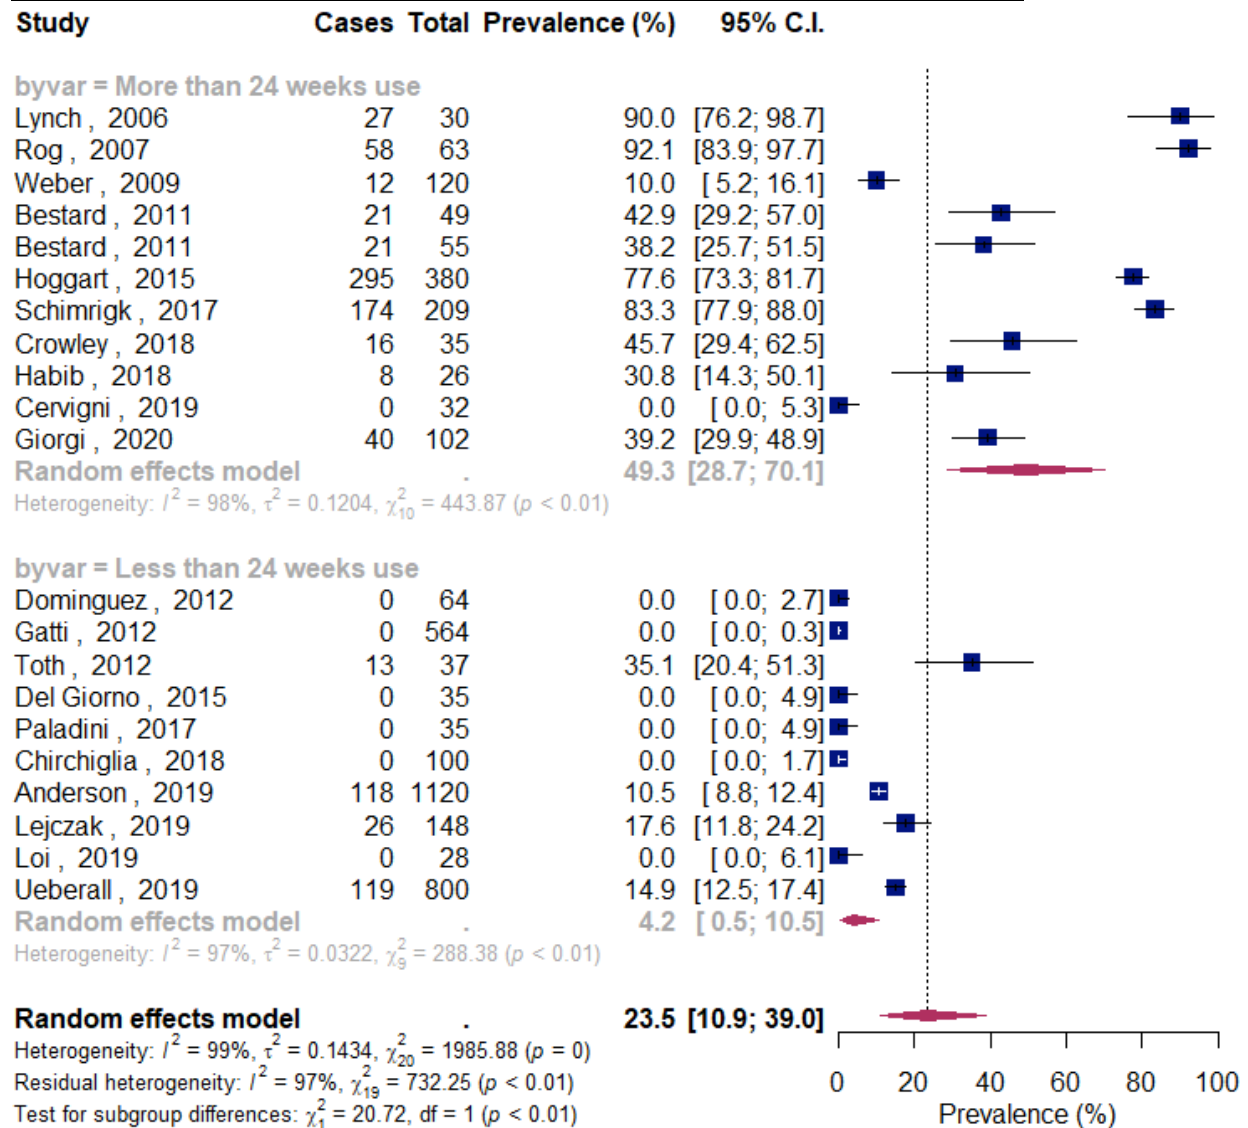

## Appendix 8: Results for all adverse events (subgroup by cannabis)

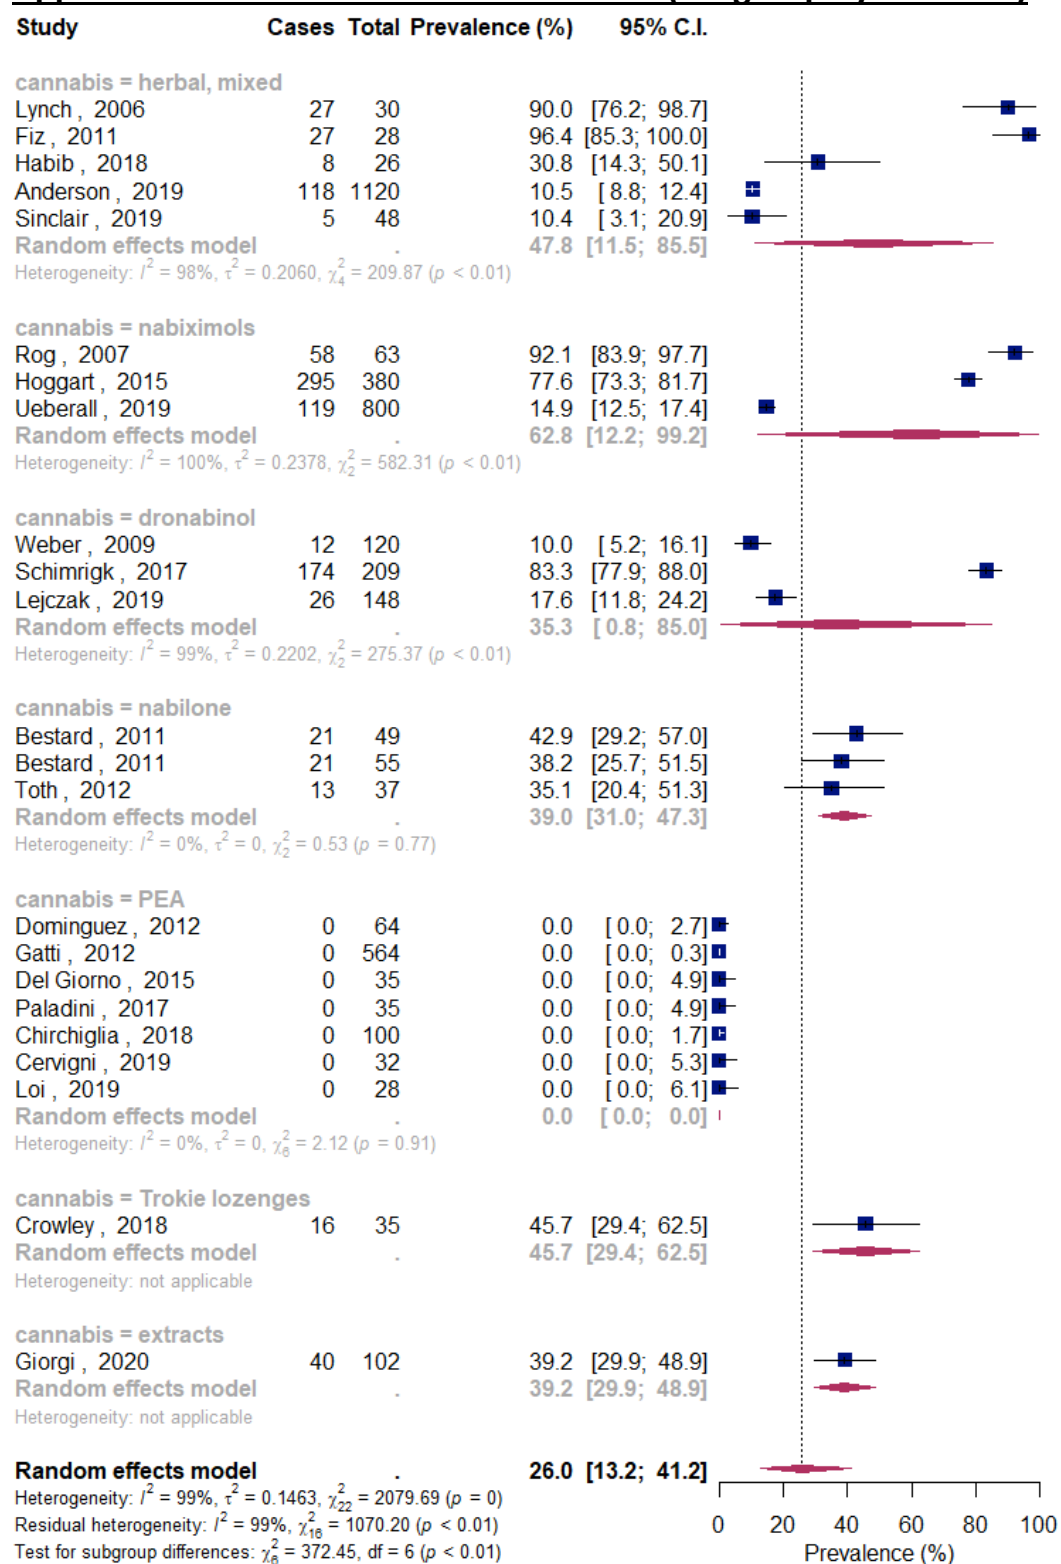

**Appendix 9: Results for all adverse events (subgroup by selection bias)**

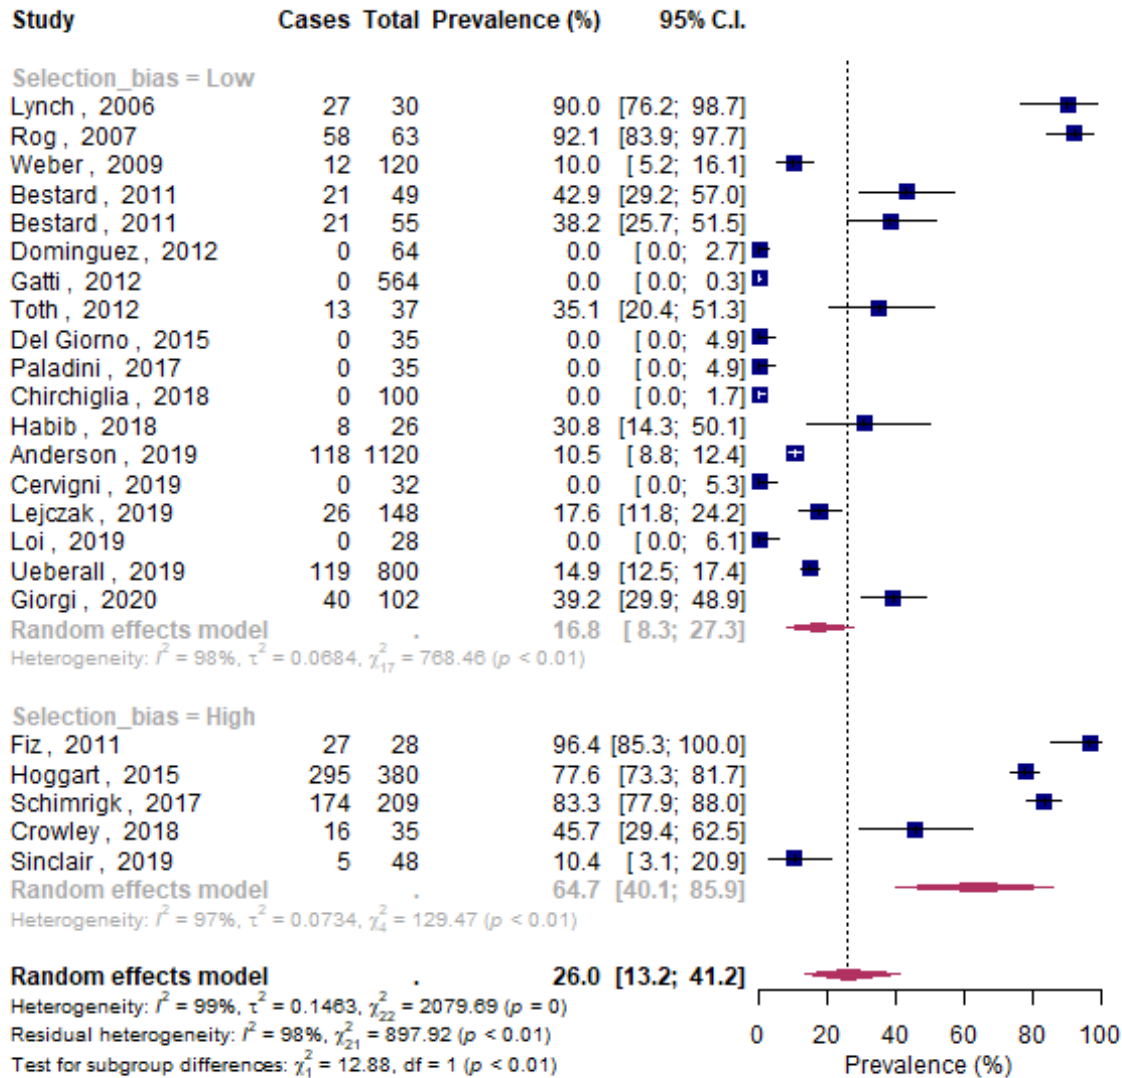

## Appendix 10: Results for adverse events leading to discontinuation (subgroup by duration)

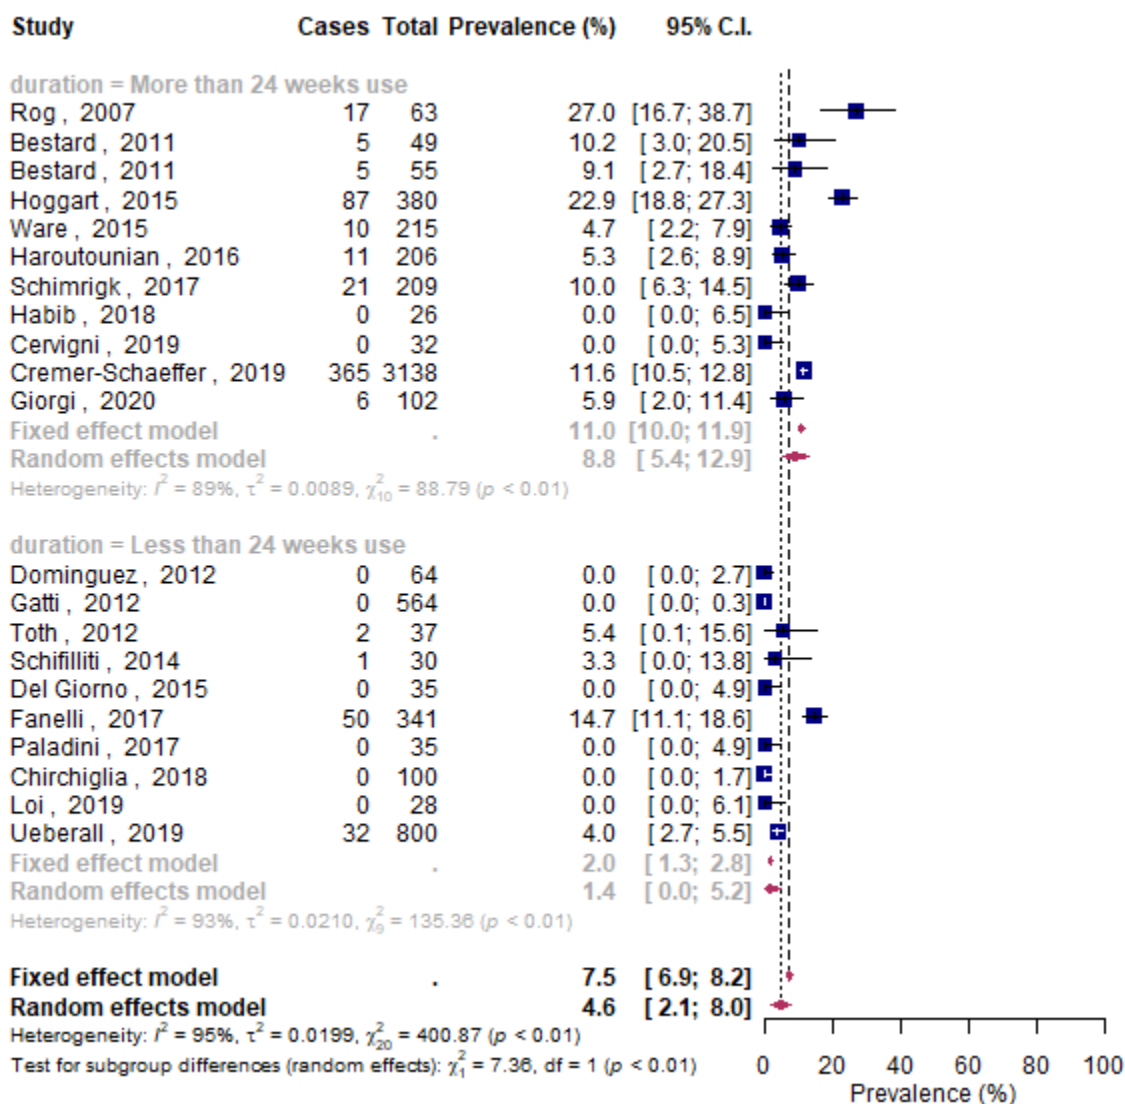

**Appendix 11: Results for adverse events leading to discontinuation (subgroup by cannabis)**

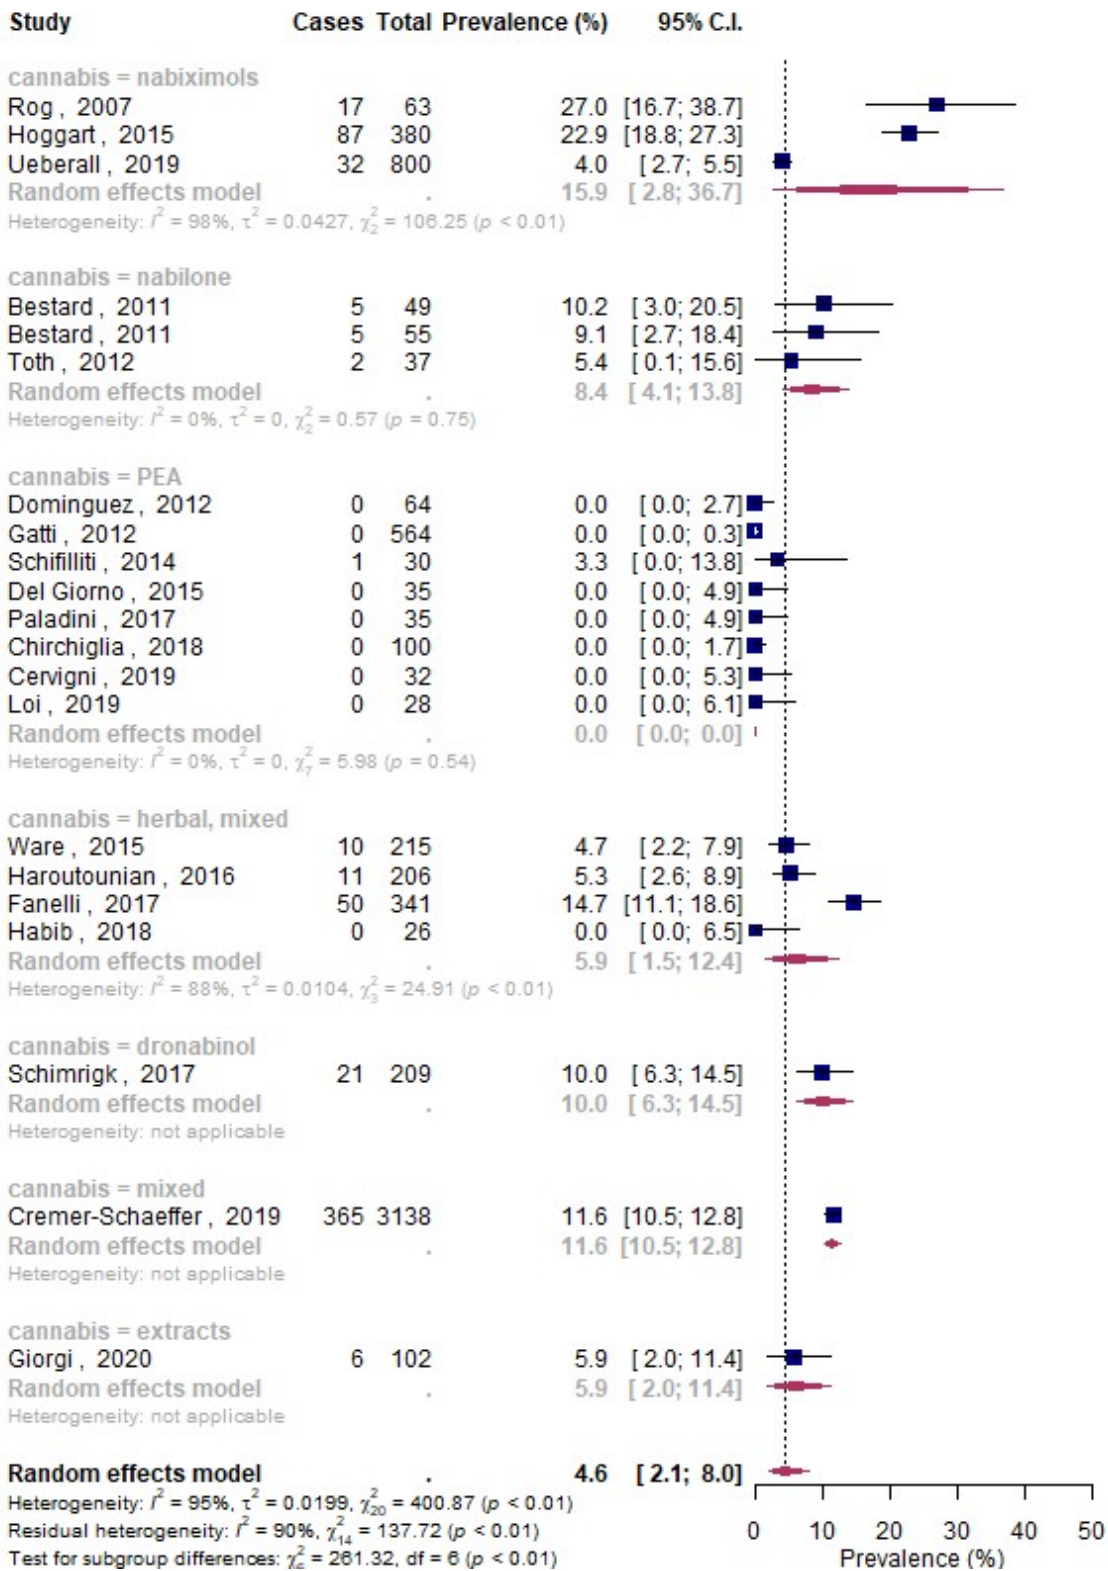

## Appendix 12: Results for adverse events leading to discontinuation (subgroup by selection bias)

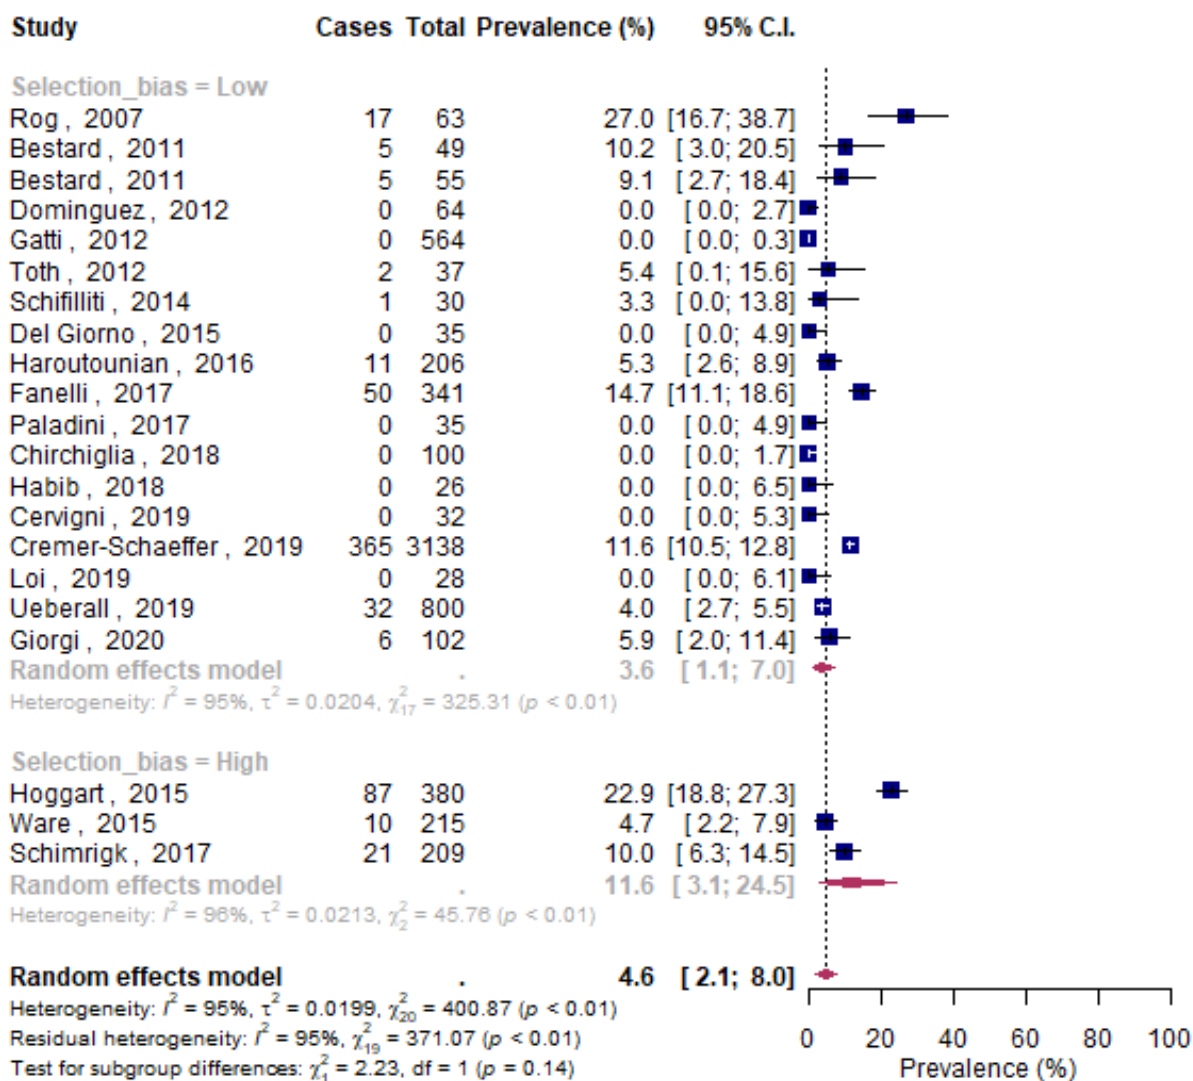

**Appendix 13: Results for serious adverse events (subgroup by design)**

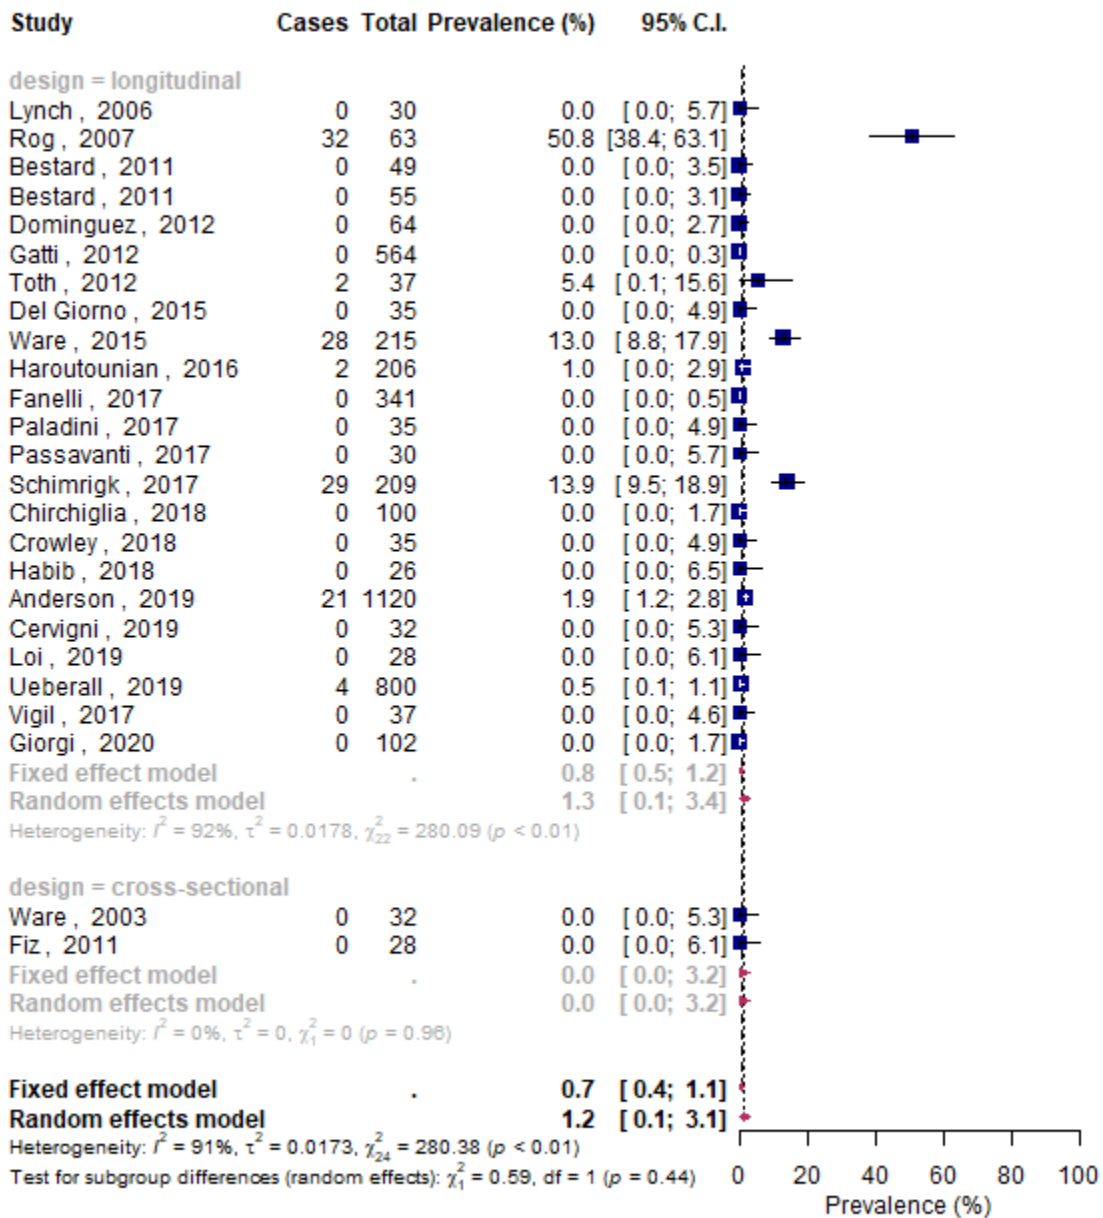

## Appendix 14: Results for serious adverse events (subgroup by duration)

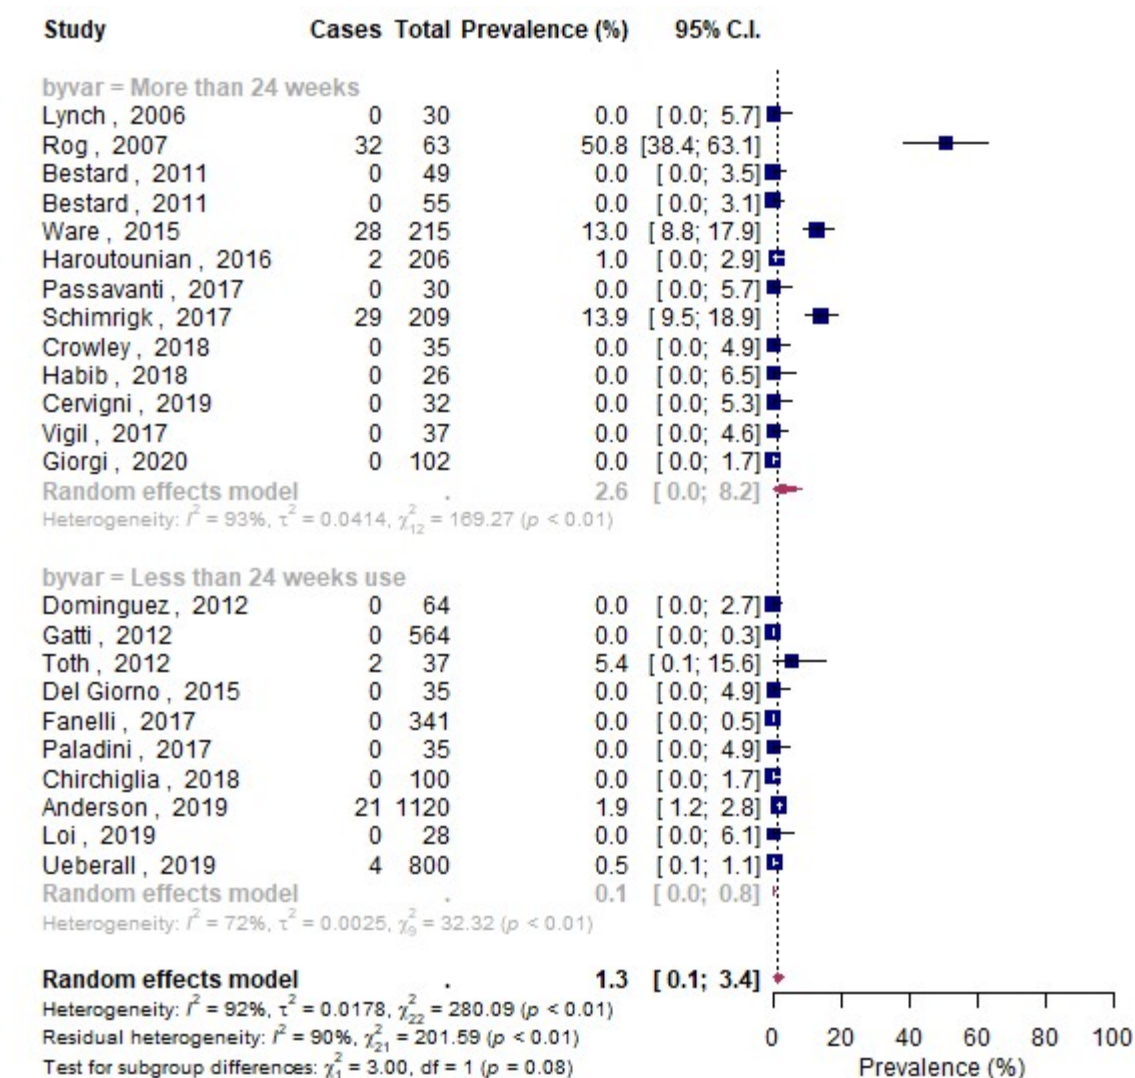



## Appendix 15: Results for serious adverse events (subgroup by selection bias)

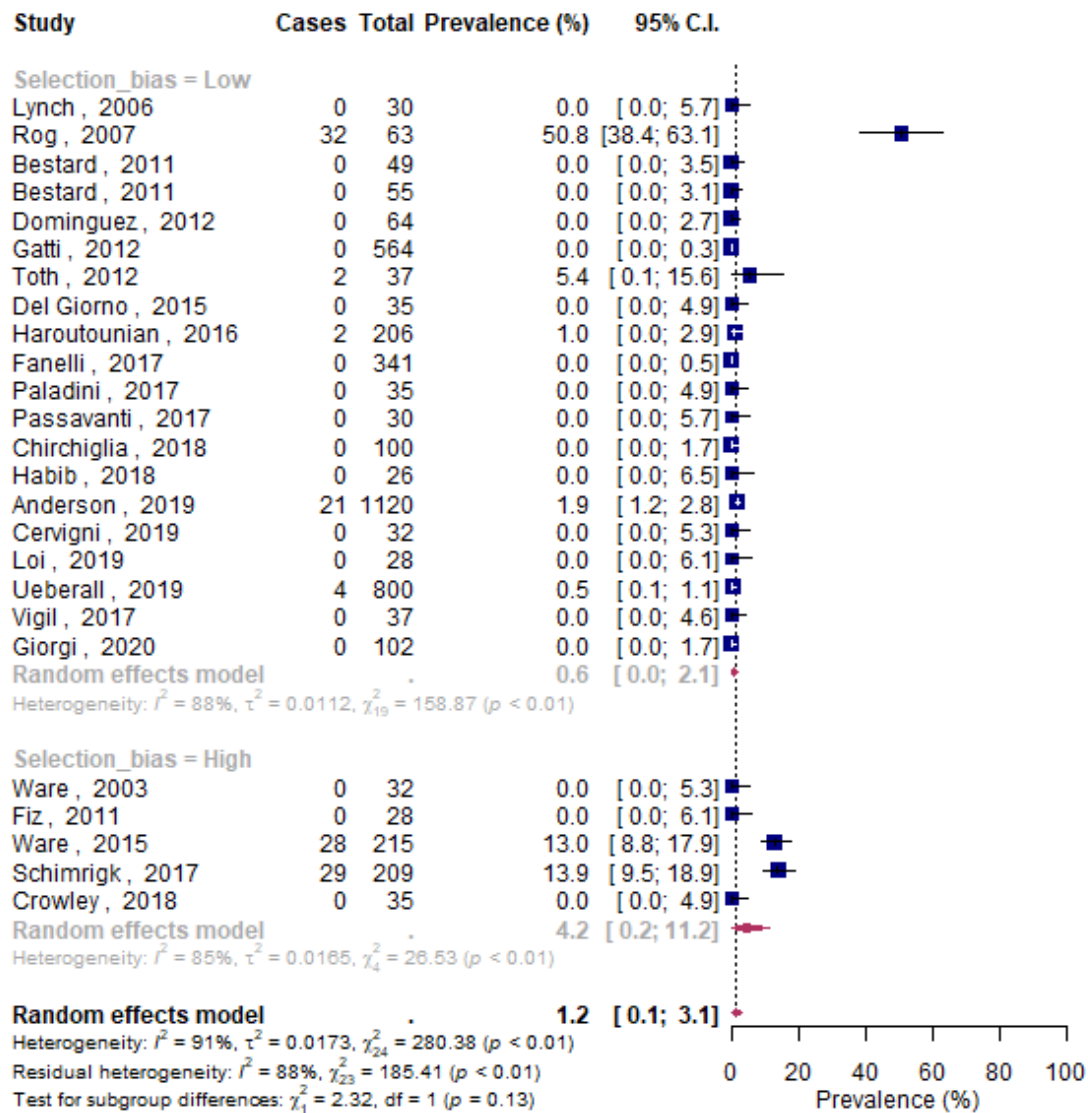

## Appendix 16: Results for psychiatric adverse events

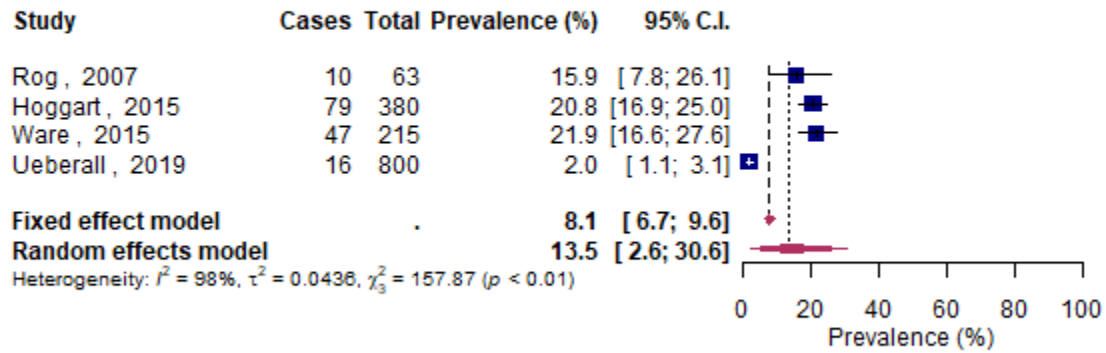

Peer review only

**Appendix 17: Results for suicide**

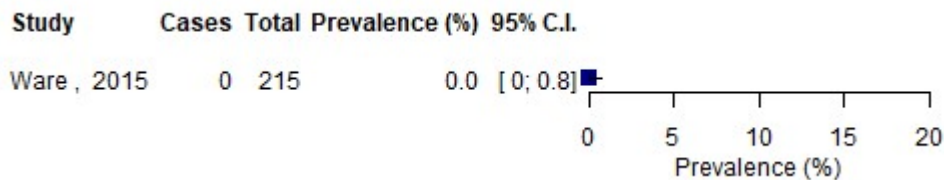

For peer review only

## Appendix 18: Results for suicidal thoughts

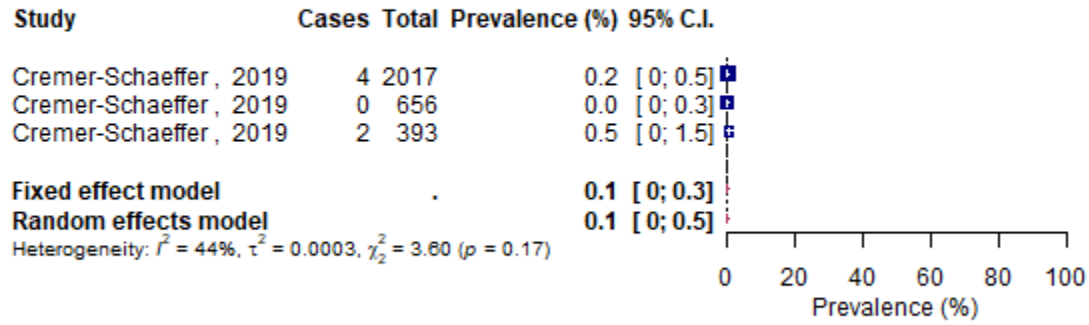

For peer review only

**Appendix 19: Results for depression**

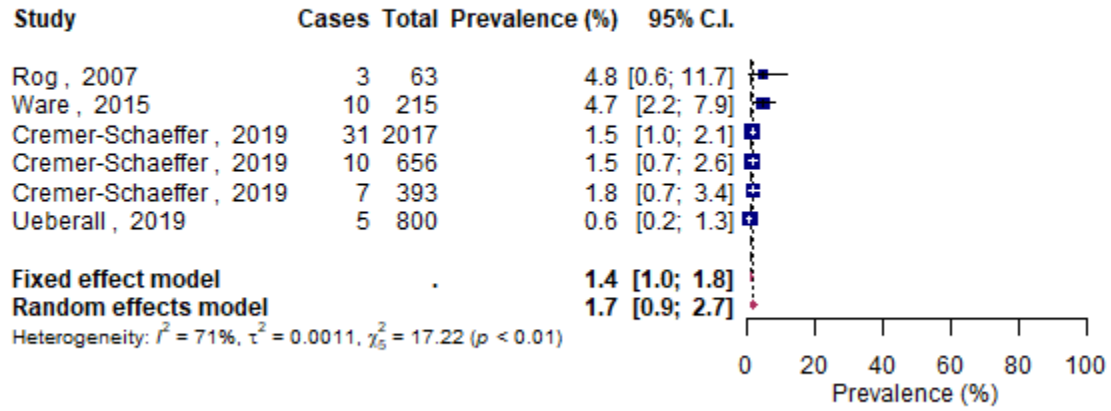

Peer review only

1  
2  
3  
4  
5  
6  
7  
8  
9  
10  
11  
12  
13  
14  
15  
16  
17  
18  
19  
20  
21  
22  
23  
24  
25  
26  
27  
28  
29  
30  
31  
32  
33  
34  
35  
36  
37  
38  
39  
40  
41  
42  
43  
44  
45  
46  
47  
48  
49  
50  
51  
52  
53  
54  
55  
56  
57  
58  
59  
60

### Appendix 20: Results for mania

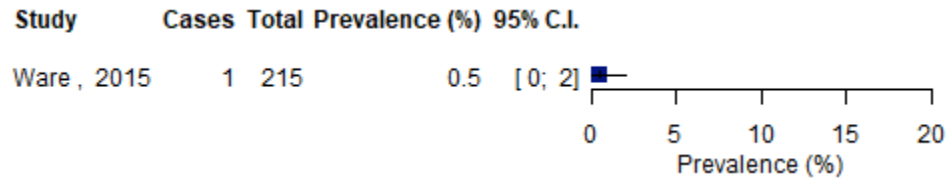

For peer review only

**Appendix 21: Results for hallucinations**

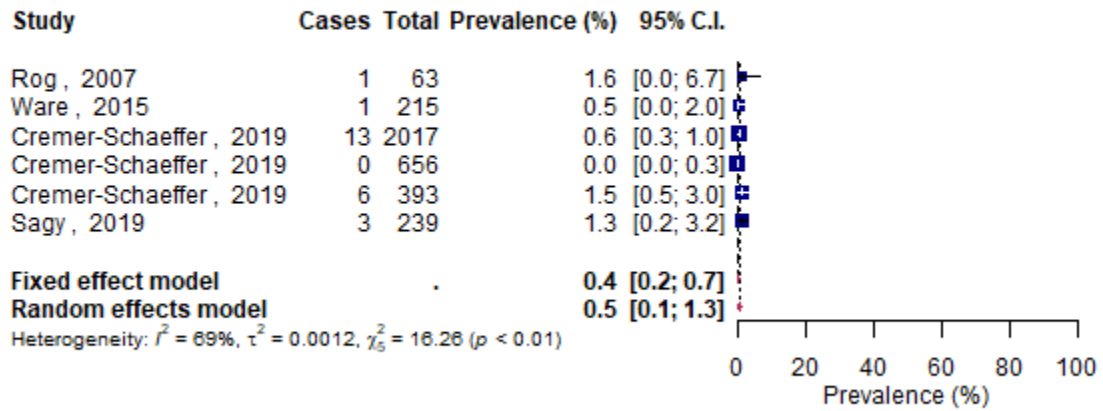

Peer review only

## Appendix 22: Results for delusions

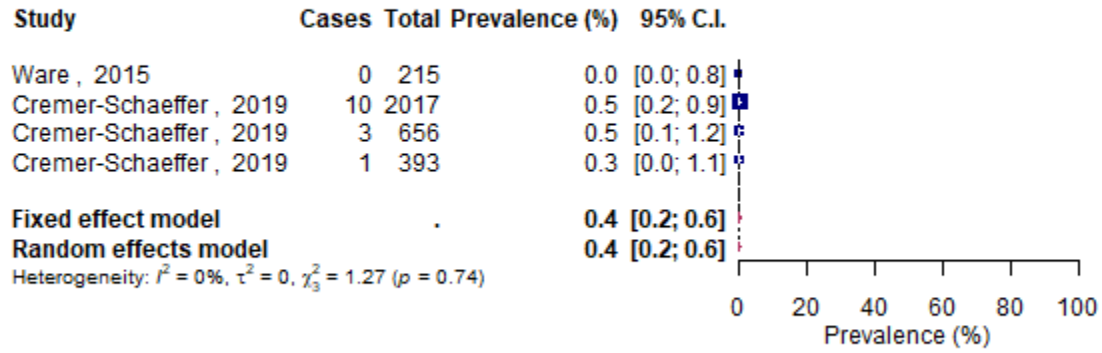

For peer review only



**Appendix 23: Results for paranoia**

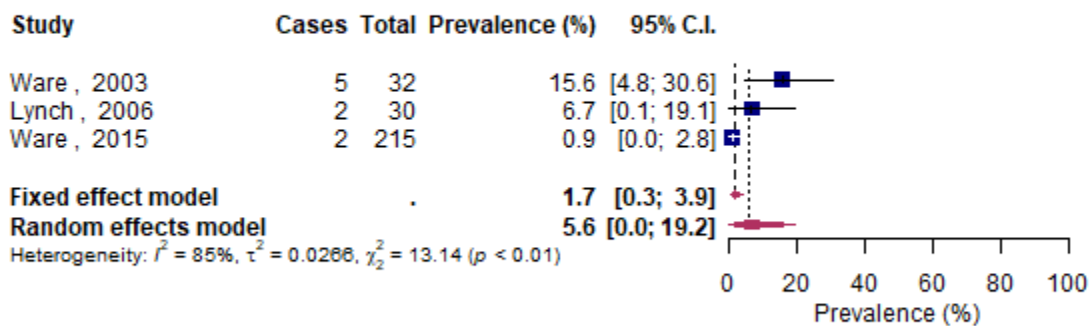

Peer review only

## Appendix 24: Results for anxiety

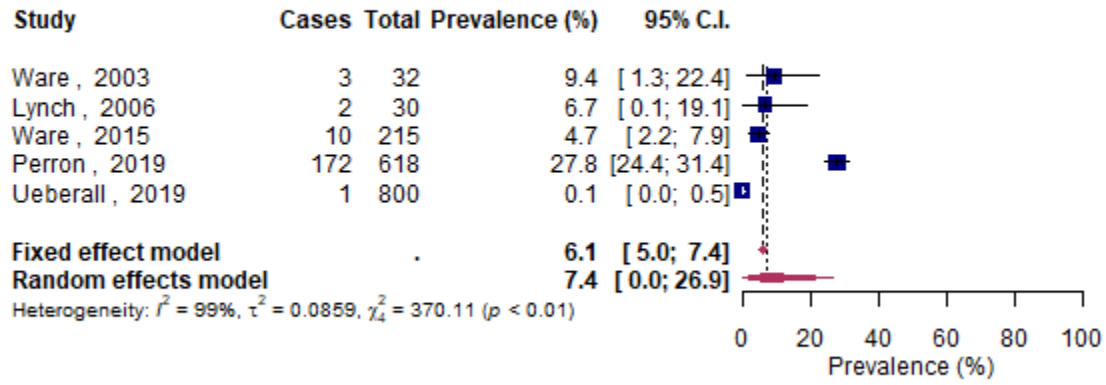

Peer review only

**Appendix 25: Results for euphoria**

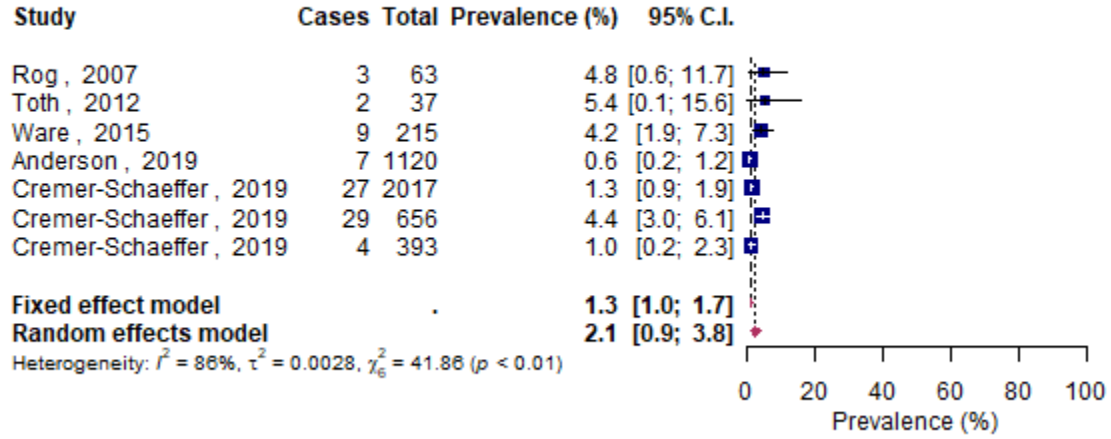

Peer review only

## Appendix 26: Results for memory impairment

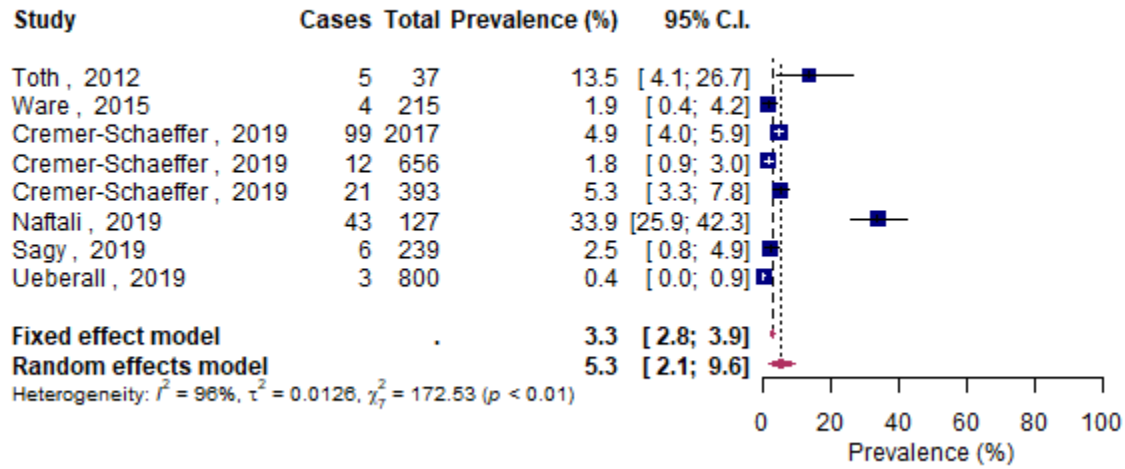

**Appendix 27: Results for confusion**

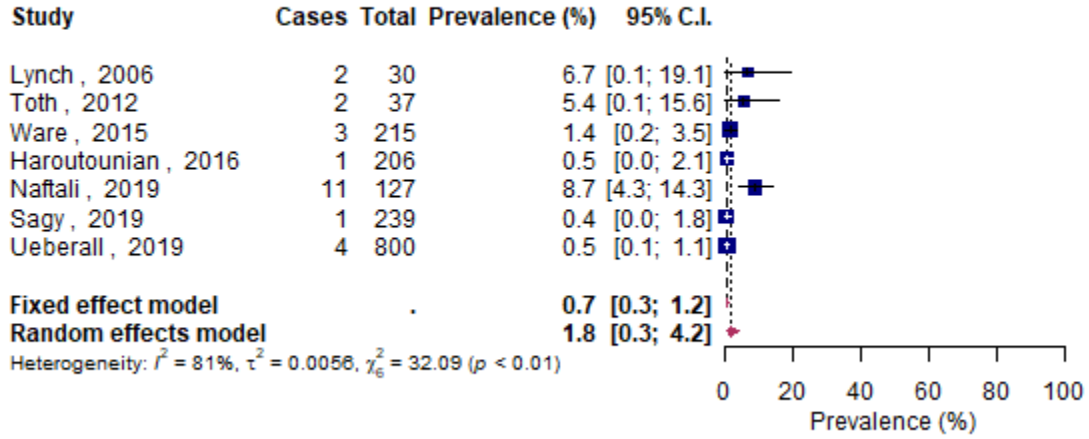

## Appendix 28: Results for disorientation

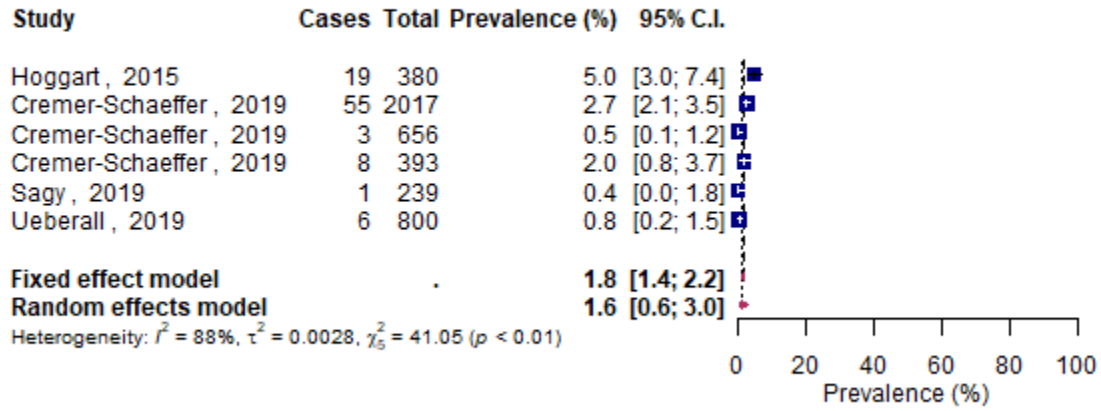

Peer review only

**Appendix 29: Results for impaired attention**

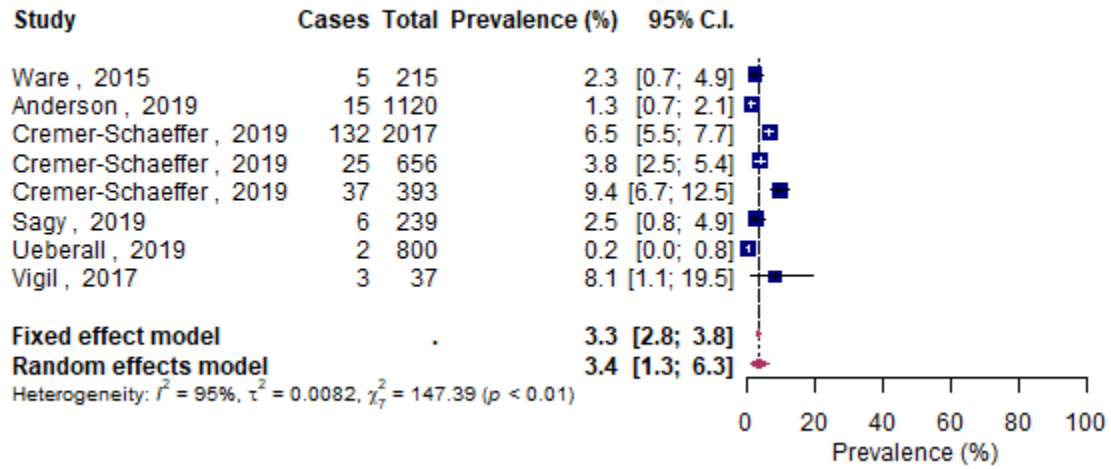

Peer review only

### Appendix 30: Results for falls

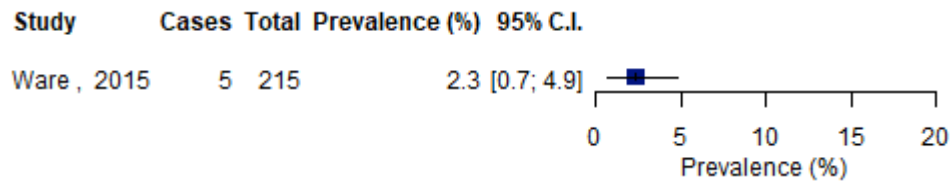

For peer review only



**Appendix 31: Results for motor vehicle accidents**

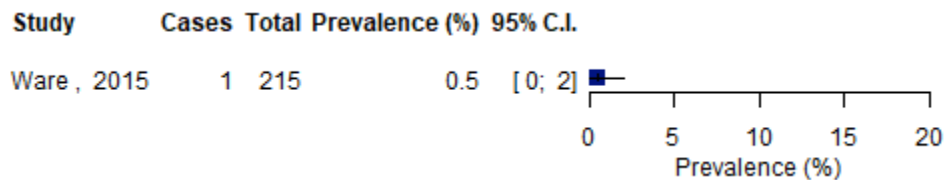

For peer review only

## Appendix 32: Results for dependence

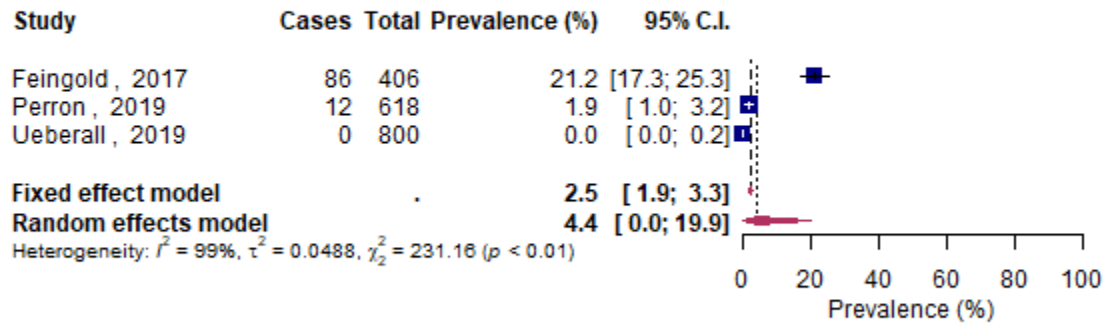

Peer review only

**Appendix 33: Results for withdrawal symptoms**

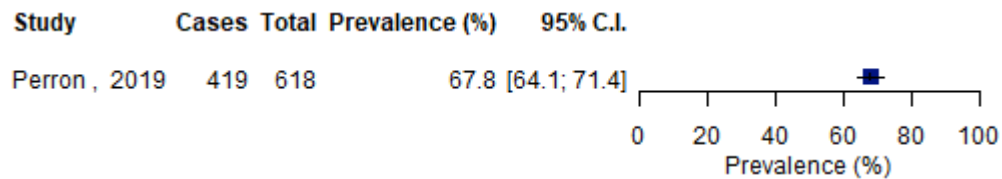

For peer review only

## Appendix 34: Results for withdrawal syndrome

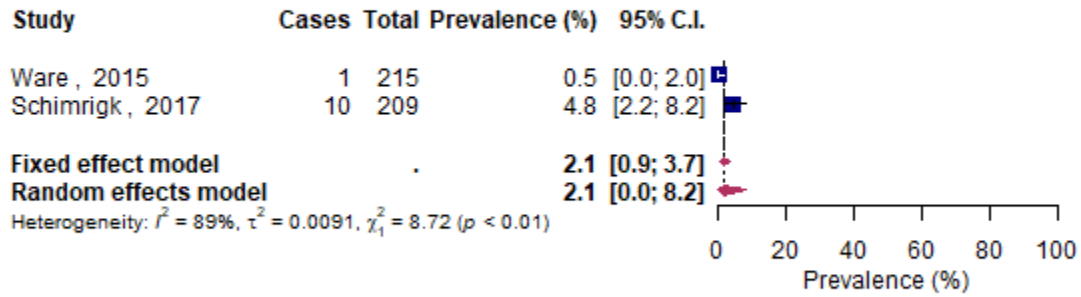

Peer review only

| Section/top<br>ic (page no)                        | Item | PRISMA checklist item                                                                                                                                                                                                                                                                                       | PRISMA<br>harms<br>(minimum)                                                                | Recommendations for reporting<br>harms in systematic reviews<br>(desirable)                                                                                                                                                            | Check<br>if done |
|----------------------------------------------------|------|-------------------------------------------------------------------------------------------------------------------------------------------------------------------------------------------------------------------------------------------------------------------------------------------------------------|---------------------------------------------------------------------------------------------|----------------------------------------------------------------------------------------------------------------------------------------------------------------------------------------------------------------------------------------|------------------|
| <b>Title</b><br>Title (3)                          | 1    | Identify the report as a systematic review, meta-analysis, or both.                                                                                                                                                                                                                                         | Specifically mention “harms” or other related terms, or the harm of interest in the review. | —                                                                                                                                                                                                                                      | X                |
| <b>Abstract</b><br>Structured<br>summary (4)       | 2    | Provide a structured summary including, as applicable: background; objectives; data sources; study eligibility criteria, participants, and interventions; study appraisal and synthesis methods; results; limitations; conclusions and implications of key findings; systematic review registration number. | —                                                                                           | Abstracts should report any analysis of harms undertaken in the review, if harms are a primary or secondary outcome.                                                                                                                   | X                |
| <b>Introduction</b><br>Rationale (5)               | 3    | Describe the rationale for the review in the context of what is already known.                                                                                                                                                                                                                              | —                                                                                           | It should clearly describe in introduction or in methods section which events are considered harms and provide a clear rationale for the specific harm(s), condition(s), and patient group(s) included in the review.                  | X                |
| <b>Objectives</b> (5)                              | 4    | Provide an explicit statement of questions being addressed with reference to participants, interventions, comparisons, outcomes, and study design (PICOS).                                                                                                                                                  | —                                                                                           | PICOS format should be specified, although in systematic reviews of harms the selection criteria for P, C, and O may be very broad (same intervention may have been used for heterogeneous indications in a diverse range of patients) | X                |
| <b>Methods</b><br>Protocol and<br>registration (6) | 5    | Indicate if a review protocol exists, if and where it can be accessed (eg, web address), and, if available, provide registration information including registration number.                                                                                                                                 | —                                                                                           | No specific additional information is required for systematic reviews of harms.                                                                                                                                                        | X                |
| <b>Eligibility<br/>Criteria</b> (6)                | 6    | Specify study characteristics (eg, PICOS, length of follow-up) and report characteristics (eg, years considered, language, publication status) used as criteria for eligibility, giving rationale.                                                                                                          | —                                                                                           | Report how handled relevant studies (based on population and intervention) when the outcomes of interest were not reported.<br>Report choices for specific study designs and length of follow-up.                                      | X                |
| <b>Information<br/>Sources</b> (7)                 | 7    | Describe all information sources (eg, databases with dates of coverage, contact with study authors to identify additional studies) in the search and date last searched.                                                                                                                                    | —                                                                                           | Report if only searched for published data, or also sought data from unpublished sources, from authors, drug manufacturers and regulatory agencies. If includes unpublished data, provide the source and the process of obtaining it.  | X                |
| <b>Search</b> (7)                                  | 8    | Present full electronic search strategy for at least one database, including any limits used, such that it could be repeated.                                                                                                                                                                               | —                                                                                           | If additional searches were used specifically to identify adverse events, authors should present the full search process so it can be replicated.                                                                                      | X                |

|    |                 |    |                                                                                                                                                                                                                        |                                                    |                                                                                                                                                                                                                                                                                                                                                                                                                                                                                                                                                                                     |   |
|----|-----------------|----|------------------------------------------------------------------------------------------------------------------------------------------------------------------------------------------------------------------------|----------------------------------------------------|-------------------------------------------------------------------------------------------------------------------------------------------------------------------------------------------------------------------------------------------------------------------------------------------------------------------------------------------------------------------------------------------------------------------------------------------------------------------------------------------------------------------------------------------------------------------------------------|---|
| 1  |                 |    |                                                                                                                                                                                                                        |                                                    |                                                                                                                                                                                                                                                                                                                                                                                                                                                                                                                                                                                     |   |
| 2  |                 |    |                                                                                                                                                                                                                        |                                                    |                                                                                                                                                                                                                                                                                                                                                                                                                                                                                                                                                                                     |   |
| 3  | Study           | 9  | State the process for selecting studies (ie, screening, eligibility, included in systematic review, and, if applicable, included in the meta-analysis).                                                                | —                                                  | If only included studies reporting on adverse events of interest, defined if screening was based on adverse event reporting in title/abstract or full text. If no harms reported in the text, report if any attempt was made to retrieve relevant data from authors.                                                                                                                                                                                                                                                                                                                | X |
| 4  | Selection (8)   |    |                                                                                                                                                                                                                        |                                                    |                                                                                                                                                                                                                                                                                                                                                                                                                                                                                                                                                                                     |   |
| 5  |                 |    |                                                                                                                                                                                                                        |                                                    |                                                                                                                                                                                                                                                                                                                                                                                                                                                                                                                                                                                     |   |
| 6  |                 |    |                                                                                                                                                                                                                        |                                                    |                                                                                                                                                                                                                                                                                                                                                                                                                                                                                                                                                                                     |   |
| 7  |                 |    |                                                                                                                                                                                                                        |                                                    |                                                                                                                                                                                                                                                                                                                                                                                                                                                                                                                                                                                     |   |
| 8  |                 |    |                                                                                                                                                                                                                        |                                                    |                                                                                                                                                                                                                                                                                                                                                                                                                                                                                                                                                                                     |   |
| 9  |                 |    |                                                                                                                                                                                                                        |                                                    |                                                                                                                                                                                                                                                                                                                                                                                                                                                                                                                                                                                     |   |
| 10 | Data            | 10 | Describe method of data extraction from reports (eg, piloted forms, independently, in duplicate) and any processes for obtaining and confirming data from investigators.                                               | —                                                  | No specific additional information is required for systematic reviews of harms.                                                                                                                                                                                                                                                                                                                                                                                                                                                                                                     | X |
| 11 | collection      |    |                                                                                                                                                                                                                        |                                                    |                                                                                                                                                                                                                                                                                                                                                                                                                                                                                                                                                                                     |   |
| 12 | process (9)     |    |                                                                                                                                                                                                                        |                                                    |                                                                                                                                                                                                                                                                                                                                                                                                                                                                                                                                                                                     |   |
| 13 |                 |    |                                                                                                                                                                                                                        |                                                    |                                                                                                                                                                                                                                                                                                                                                                                                                                                                                                                                                                                     |   |
| 14 | Data            | 11 | List and define all variables for which data were sought (eg, PICOS, funding sources) and any assumptions and simplifications made.                                                                                    | —                                                  | Report the definition of the harm and seriousness used by each included study (if applicable). Report if multiple events occurred in the same individuals, if this information is available. Consider if the harm may be related to factors associated with participants (eg, age, sex, use of medications) or provider (eg, years of practice, level of training). Specify if information was extracted and how it was used in subsequent results. Specify if extracted details regarding the specific methods used to capture harms (active/passive and timing of adverse event). | X |
| 15 | items (9)       |    |                                                                                                                                                                                                                        |                                                    |                                                                                                                                                                                                                                                                                                                                                                                                                                                                                                                                                                                     |   |
| 16 |                 |    |                                                                                                                                                                                                                        |                                                    |                                                                                                                                                                                                                                                                                                                                                                                                                                                                                                                                                                                     |   |
| 17 |                 |    |                                                                                                                                                                                                                        |                                                    |                                                                                                                                                                                                                                                                                                                                                                                                                                                                                                                                                                                     |   |
| 18 |                 |    |                                                                                                                                                                                                                        |                                                    |                                                                                                                                                                                                                                                                                                                                                                                                                                                                                                                                                                                     |   |
| 19 |                 |    |                                                                                                                                                                                                                        |                                                    |                                                                                                                                                                                                                                                                                                                                                                                                                                                                                                                                                                                     |   |
| 20 |                 |    |                                                                                                                                                                                                                        |                                                    |                                                                                                                                                                                                                                                                                                                                                                                                                                                                                                                                                                                     |   |
| 21 |                 |    |                                                                                                                                                                                                                        |                                                    |                                                                                                                                                                                                                                                                                                                                                                                                                                                                                                                                                                                     |   |
| 22 |                 |    |                                                                                                                                                                                                                        |                                                    |                                                                                                                                                                                                                                                                                                                                                                                                                                                                                                                                                                                     |   |
| 23 |                 |    |                                                                                                                                                                                                                        |                                                    |                                                                                                                                                                                                                                                                                                                                                                                                                                                                                                                                                                                     |   |
| 24 |                 |    |                                                                                                                                                                                                                        |                                                    |                                                                                                                                                                                                                                                                                                                                                                                                                                                                                                                                                                                     |   |
| 25 |                 |    |                                                                                                                                                                                                                        |                                                    |                                                                                                                                                                                                                                                                                                                                                                                                                                                                                                                                                                                     |   |
| 26 |                 |    |                                                                                                                                                                                                                        |                                                    |                                                                                                                                                                                                                                                                                                                                                                                                                                                                                                                                                                                     |   |
| 27 |                 |    |                                                                                                                                                                                                                        |                                                    |                                                                                                                                                                                                                                                                                                                                                                                                                                                                                                                                                                                     |   |
| 28 |                 |    |                                                                                                                                                                                                                        |                                                    |                                                                                                                                                                                                                                                                                                                                                                                                                                                                                                                                                                                     |   |
| 29 | Risk of bias in | 12 | Describe methods used for assessing risk of bias of individual studies (including specification of whether this was done at the study or outcome level), and how this information is to be used in any data synthesis. | —                                                  | The risk of bias assessment should be considered separately for outcomes of benefit and harms.                                                                                                                                                                                                                                                                                                                                                                                                                                                                                      | X |
| 30 | individual      |    |                                                                                                                                                                                                                        |                                                    |                                                                                                                                                                                                                                                                                                                                                                                                                                                                                                                                                                                     |   |
| 31 | studies (10)    |    |                                                                                                                                                                                                                        |                                                    |                                                                                                                                                                                                                                                                                                                                                                                                                                                                                                                                                                                     |   |
| 32 |                 |    |                                                                                                                                                                                                                        |                                                    |                                                                                                                                                                                                                                                                                                                                                                                                                                                                                                                                                                                     |   |
| 33 |                 |    |                                                                                                                                                                                                                        |                                                    |                                                                                                                                                                                                                                                                                                                                                                                                                                                                                                                                                                                     |   |
| 34 |                 |    |                                                                                                                                                                                                                        |                                                    |                                                                                                                                                                                                                                                                                                                                                                                                                                                                                                                                                                                     |   |
| 35 | Summary         | 13 | State the principal summary measures (eg, risk ratio, difference in means).                                                                                                                                            | —                                                  | No specific additional information is required for systematic reviews of harms.                                                                                                                                                                                                                                                                                                                                                                                                                                                                                                     | X |
| 36 | measures (11)   |    |                                                                                                                                                                                                                        |                                                    |                                                                                                                                                                                                                                                                                                                                                                                                                                                                                                                                                                                     |   |
| 37 |                 |    |                                                                                                                                                                                                                        |                                                    |                                                                                                                                                                                                                                                                                                                                                                                                                                                                                                                                                                                     |   |
| 38 | Synthesis of    | 14 | Describe the methods of handling data and combining results of studies, if done, including measures of consistency (eg, $I^2$ ) for each meta-analysis.                                                                | Specify how zero events were handled, if relevant. |                                                                                                                                                                                                                                                                                                                                                                                                                                                                                                                                                                                     |   |
| 39 | results (11)    |    |                                                                                                                                                                                                                        |                                                    |                                                                                                                                                                                                                                                                                                                                                                                                                                                                                                                                                                                     |   |
| 40 |                 |    |                                                                                                                                                                                                                        |                                                    |                                                                                                                                                                                                                                                                                                                                                                                                                                                                                                                                                                                     |   |
| 41 | Risk of bias    | 15 | Specify any assessment of risk of bias that may affect the cumulative evidence (eg, publication bias, selective reporting within studies).                                                                             | —                                                  | Present the extent of missing information (studies without harms outcomes), any factors that may account for their absence, and whether these reasons may be related to the results.                                                                                                                                                                                                                                                                                                                                                                                                | X |
| 42 | across studies  |    |                                                                                                                                                                                                                        |                                                    |                                                                                                                                                                                                                                                                                                                                                                                                                                                                                                                                                                                     |   |
| 43 | (11)            |    |                                                                                                                                                                                                                        |                                                    |                                                                                                                                                                                                                                                                                                                                                                                                                                                                                                                                                                                     |   |
| 44 |                 |    |                                                                                                                                                                                                                        |                                                    |                                                                                                                                                                                                                                                                                                                                                                                                                                                                                                                                                                                     |   |
| 45 |                 |    |                                                                                                                                                                                                                        |                                                    |                                                                                                                                                                                                                                                                                                                                                                                                                                                                                                                                                                                     |   |
| 46 | Additional      | 16 | Describe methods of additional analyses (eg, sensitivity or subgroup analyses, meta-regression), if done, indicating which were prespecified.                                                                          | —                                                  | Sensitivity analyses may be affected by different definitions, grading, and attribution of adverse events, as adverse events are typically infrequent or reported using heterogeneous classifications. Report the number of participants and studies included in each subgroup.                                                                                                                                                                                                                                                                                                     | X |
| 47 | analyses (12)   |    |                                                                                                                                                                                                                        |                                                    |                                                                                                                                                                                                                                                                                                                                                                                                                                                                                                                                                                                     |   |
| 48 |                 |    |                                                                                                                                                                                                                        |                                                    |                                                                                                                                                                                                                                                                                                                                                                                                                                                                                                                                                                                     |   |
| 49 |                 |    |                                                                                                                                                                                                                        |                                                    |                                                                                                                                                                                                                                                                                                                                                                                                                                                                                                                                                                                     |   |
| 50 |                 |    |                                                                                                                                                                                                                        |                                                    |                                                                                                                                                                                                                                                                                                                                                                                                                                                                                                                                                                                     |   |
| 51 |                 |    |                                                                                                                                                                                                                        |                                                    |                                                                                                                                                                                                                                                                                                                                                                                                                                                                                                                                                                                     |   |
| 52 | Results         |    |                                                                                                                                                                                                                        |                                                    |                                                                                                                                                                                                                                                                                                                                                                                                                                                                                                                                                                                     |   |
| 53 | Study           | 17 | Give numbers of studies screened, assessed for eligibility, and included in the review, with reasons for exclusions at each                                                                                            | —                                                  | If a review addresses both efficacy and harms, display a flow diagram specific for each (efficacy and harm).                                                                                                                                                                                                                                                                                                                                                                                                                                                                        | X |
| 54 | selection (13)  |    |                                                                                                                                                                                                                        |                                                    |                                                                                                                                                                                                                                                                                                                                                                                                                                                                                                                                                                                     |   |
| 55 |                 |    |                                                                                                                                                                                                                        |                                                    |                                                                                                                                                                                                                                                                                                                                                                                                                                                                                                                                                                                     |   |
| 56 |                 |    |                                                                                                                                                                                                                        |                                                    |                                                                                                                                                                                                                                                                                                                                                                                                                                                                                                                                                                                     |   |
| 57 |                 |    |                                                                                                                                                                                                                        |                                                    |                                                                                                                                                                                                                                                                                                                                                                                                                                                                                                                                                                                     |   |
| 58 |                 |    |                                                                                                                                                                                                                        |                                                    |                                                                                                                                                                                                                                                                                                                                                                                                                                                                                                                                                                                     |   |
| 59 |                 |    |                                                                                                                                                                                                                        |                                                    |                                                                                                                                                                                                                                                                                                                                                                                                                                                                                                                                                                                     |   |
| 60 |                 |    |                                                                                                                                                                                                                        |                                                    |                                                                                                                                                                                                                                                                                                                                                                                                                                                                                                                                                                                     |   |

|    |                                    |                                                                                                                                                                                                             |                                                                                                                    |                                                                                                                                                                                                                                                                                                                                          |   |
|----|------------------------------------|-------------------------------------------------------------------------------------------------------------------------------------------------------------------------------------------------------------|--------------------------------------------------------------------------------------------------------------------|------------------------------------------------------------------------------------------------------------------------------------------------------------------------------------------------------------------------------------------------------------------------------------------------------------------------------------------|---|
| 1  |                                    |                                                                                                                                                                                                             |                                                                                                                    |                                                                                                                                                                                                                                                                                                                                          |   |
| 2  |                                    |                                                                                                                                                                                                             |                                                                                                                    |                                                                                                                                                                                                                                                                                                                                          |   |
| 3  |                                    | stage, ideally with a flow diagram.                                                                                                                                                                         |                                                                                                                    |                                                                                                                                                                                                                                                                                                                                          |   |
| 4  |                                    |                                                                                                                                                                                                             |                                                                                                                    |                                                                                                                                                                                                                                                                                                                                          |   |
| 5  |                                    |                                                                                                                                                                                                             |                                                                                                                    |                                                                                                                                                                                                                                                                                                                                          |   |
| 6  | Study characteristics (14)         | 18 For each study, present characteristics for which data were extracted (eg, study size, PICOS, follow-up period) and provide the citations.                                                               | Define each harm addressed, how it was ascertained (eg, patient report, active search), and over what time period. | Add additional characteristics to: “P” (population) patient risk factors that were considered as possibly affecting the risk of the harm outcome. “I” (intervention) professional expertise/skills if relevant (for example if the intervention is a procedure). “T” (time) timing of all harms assessments and the length of follow-up. | X |
| 7  |                                    |                                                                                                                                                                                                             |                                                                                                                    |                                                                                                                                                                                                                                                                                                                                          |   |
| 8  |                                    |                                                                                                                                                                                                             |                                                                                                                    |                                                                                                                                                                                                                                                                                                                                          |   |
| 9  |                                    |                                                                                                                                                                                                             |                                                                                                                    |                                                                                                                                                                                                                                                                                                                                          |   |
| 10 |                                    |                                                                                                                                                                                                             |                                                                                                                    |                                                                                                                                                                                                                                                                                                                                          |   |
| 11 |                                    |                                                                                                                                                                                                             |                                                                                                                    |                                                                                                                                                                                                                                                                                                                                          |   |
| 12 |                                    |                                                                                                                                                                                                             |                                                                                                                    |                                                                                                                                                                                                                                                                                                                                          |   |
| 13 | Risk of bias within studies (15)   | 19 Present data on risk of bias of each study and, if available, any outcome level assessment (see item 12).                                                                                                | —                                                                                                                  | Consider the possible sources of biases that could affect the specific harm under consideration within the review. Sample selection, dropouts and measurement of adverse events should be evaluated separately from the outcomes of benefit as described in item 12, above.                                                              | X |
| 14 |                                    |                                                                                                                                                                                                             |                                                                                                                    |                                                                                                                                                                                                                                                                                                                                          |   |
| 15 |                                    |                                                                                                                                                                                                             |                                                                                                                    |                                                                                                                                                                                                                                                                                                                                          |   |
| 16 |                                    |                                                                                                                                                                                                             |                                                                                                                    |                                                                                                                                                                                                                                                                                                                                          |   |
| 17 |                                    |                                                                                                                                                                                                             |                                                                                                                    |                                                                                                                                                                                                                                                                                                                                          |   |
| 18 |                                    |                                                                                                                                                                                                             |                                                                                                                    |                                                                                                                                                                                                                                                                                                                                          |   |
| 19 |                                    |                                                                                                                                                                                                             |                                                                                                                    |                                                                                                                                                                                                                                                                                                                                          |   |
| 20 | Results of individual studies (16) | 20 For all outcomes considered (benefits or harms), present, for each study: (a) simple summary data for each intervention group (b) effect estimates and confidence intervals, ideally with a forest plot. | —                                                                                                                  | Report the actual numbers of adverse events in each study, separately for each intervention.                                                                                                                                                                                                                                             | X |
| 21 | Synthesis of results (17)          | 21 Present results of each meta-analysis done, including confidence intervals and measures of consistency.                                                                                                  | Describe any assessment of possible causality.                                                                     | If included data from unpublished sources, report clearly the data source and the impact of these studies to the final systematic review.                                                                                                                                                                                                | X |
| 22 | Risk of bias across studies (18)   | 22 Present results of any assessment of risk of bias across studies (see item 15).                                                                                                                          | —                                                                                                                  | No specific additional information is required for systematic reviews of harms. See item 15 above.                                                                                                                                                                                                                                       | X |
| 23 | Additional analysis (18)           | 23 Give results of additional analyses, if done (eg, sensitivity or subgroup analyses, meta-regression (see item 16)).                                                                                      | —                                                                                                                  | No specific additional information is required for systematic reviews of harms.                                                                                                                                                                                                                                                          | X |
| 24 | Discussion                         |                                                                                                                                                                                                             |                                                                                                                    |                                                                                                                                                                                                                                                                                                                                          |   |
| 25 | Summary of evidence (18)           | 24 Summarise the main findings including the strength of evidence for each main outcome; consider their relevance to key groups (eg, healthcare providers, users, and policy makers).                       | —                                                                                                                  | No specific additional information is required for systematic reviews of harms.                                                                                                                                                                                                                                                          | X |
| 26 | Limitations (18)                   | 25 Discuss limitations at study and outcome level (eg, risk of bias), and at review level (eg, incomplete retrieval of identified research, reporting bias).                                                | —                                                                                                                  | Recognise possible limitations of meta-analysis for rare adverse events (ie, quality and quantity of data), issues noted previously related to collection and reporting.                                                                                                                                                                 | X |
| 27 | Conclusions (18)                   | 26 Provide a general interpretation of the results in the context of other evidence, and implications for future research.                                                                                  | —                                                                                                                  | State conclusions in coherence with the review findings. When adverse events were not identified we caution against the conclusion that the intervention is “safe,” when, in reality, its safety remains unknown.                                                                                                                        | X |
| 28 |                                    |                                                                                                                                                                                                             |                                                                                                                    |                                                                                                                                                                                                                                                                                                                                          |   |
| 29 |                                    |                                                                                                                                                                                                             |                                                                                                                    |                                                                                                                                                                                                                                                                                                                                          |   |
| 30 |                                    |                                                                                                                                                                                                             |                                                                                                                    |                                                                                                                                                                                                                                                                                                                                          |   |
| 31 |                                    |                                                                                                                                                                                                             |                                                                                                                    |                                                                                                                                                                                                                                                                                                                                          |   |
| 32 |                                    |                                                                                                                                                                                                             |                                                                                                                    |                                                                                                                                                                                                                                                                                                                                          |   |
| 33 |                                    |                                                                                                                                                                                                             |                                                                                                                    |                                                                                                                                                                                                                                                                                                                                          |   |
| 34 |                                    |                                                                                                                                                                                                             |                                                                                                                    |                                                                                                                                                                                                                                                                                                                                          |   |
| 35 |                                    |                                                                                                                                                                                                             |                                                                                                                    |                                                                                                                                                                                                                                                                                                                                          |   |
| 36 |                                    |                                                                                                                                                                                                             |                                                                                                                    |                                                                                                                                                                                                                                                                                                                                          |   |
| 37 |                                    |                                                                                                                                                                                                             |                                                                                                                    |                                                                                                                                                                                                                                                                                                                                          |   |
| 38 |                                    |                                                                                                                                                                                                             |                                                                                                                    |                                                                                                                                                                                                                                                                                                                                          |   |
| 39 |                                    |                                                                                                                                                                                                             |                                                                                                                    |                                                                                                                                                                                                                                                                                                                                          |   |
| 40 |                                    |                                                                                                                                                                                                             |                                                                                                                    |                                                                                                                                                                                                                                                                                                                                          |   |
| 41 |                                    |                                                                                                                                                                                                             |                                                                                                                    |                                                                                                                                                                                                                                                                                                                                          |   |
| 42 |                                    |                                                                                                                                                                                                             |                                                                                                                    |                                                                                                                                                                                                                                                                                                                                          |   |
| 43 |                                    |                                                                                                                                                                                                             |                                                                                                                    |                                                                                                                                                                                                                                                                                                                                          |   |
| 44 |                                    |                                                                                                                                                                                                             |                                                                                                                    |                                                                                                                                                                                                                                                                                                                                          |   |
| 45 |                                    |                                                                                                                                                                                                             |                                                                                                                    |                                                                                                                                                                                                                                                                                                                                          |   |
| 46 |                                    |                                                                                                                                                                                                             |                                                                                                                    |                                                                                                                                                                                                                                                                                                                                          |   |
| 47 |                                    |                                                                                                                                                                                                             |                                                                                                                    |                                                                                                                                                                                                                                                                                                                                          |   |
| 48 |                                    |                                                                                                                                                                                                             |                                                                                                                    |                                                                                                                                                                                                                                                                                                                                          |   |
| 49 |                                    |                                                                                                                                                                                                             |                                                                                                                    |                                                                                                                                                                                                                                                                                                                                          |   |
| 50 |                                    |                                                                                                                                                                                                             |                                                                                                                    |                                                                                                                                                                                                                                                                                                                                          |   |
| 51 | Funding (19)                       | 27 Describe sources of funding for the systematic review and other support (eg, supply of data); role of funders for the systematic review.                                                                 | —                                                                                                                  | No specific additional information is required for systematic reviews of harms.                                                                                                                                                                                                                                                          | X |
| 52 |                                    |                                                                                                                                                                                                             |                                                                                                                    |                                                                                                                                                                                                                                                                                                                                          |   |
| 53 |                                    |                                                                                                                                                                                                             |                                                                                                                    |                                                                                                                                                                                                                                                                                                                                          |   |
| 54 |                                    |                                                                                                                                                                                                             |                                                                                                                    |                                                                                                                                                                                                                                                                                                                                          |   |
| 55 |                                    |                                                                                                                                                                                                             |                                                                                                                    |                                                                                                                                                                                                                                                                                                                                          |   |
| 56 |                                    |                                                                                                                                                                                                             |                                                                                                                    |                                                                                                                                                                                                                                                                                                                                          |   |
| 57 |                                    |                                                                                                                                                                                                             |                                                                                                                    |                                                                                                                                                                                                                                                                                                                                          |   |
| 58 |                                    |                                                                                                                                                                                                             |                                                                                                                    |                                                                                                                                                                                                                                                                                                                                          |   |
| 59 |                                    |                                                                                                                                                                                                             |                                                                                                                    |                                                                                                                                                                                                                                                                                                                                          |   |
| 60 |                                    |                                                                                                                                                                                                             |                                                                                                                    |                                                                                                                                                                                                                                                                                                                                          |   |
